# Supplementary material for: Gene expression and DNA methylation altering lead to the high oil content in wild allotetraploid peanut (A. monticola)
Source: Research Square preprint supplement (doi:10.21203/rs.3.rs-1222296/v1), 2022-01-07
Supplement: Supplementary file 1 [file ab5e7790ec1b8ecfe6b31dbe.xlsx]

## Sheet: Table S5
Table S5. Detected DEGs betweeen wild and cultivated peanuts at R8 stage
GeneID	Length	BW-Expression	BC-Expression	log2Ratio(BW/BC)	q-value(Storey et al. 2003)	Up-Down-Regulation(BC/BW)	Cellular Component	Molecular Function	Biological Process	Kegg Orthology	Nr Description
Aradu.00BL5	443	83	351	-1.32708	8.1947e-18	Down	NA	NA	NA	NA	NA
Aradu.027FB	831	140.87	105.78	1.1665	1.35518e-10	Up	NA	NA	GO:0044699//single-organism process	K17479//glutaredoxin domain-containing cysteine-rich protein 1	gi|593692544|ref|XP_007146814.1|//hypothetical protein PHAVU_006G072000g [Phaseolus vulgaris]
Aradu.02YQS	1129	141	102	1.22033	2.89149e-11	Up	NA	NA	GO:0007165//signal transduction	K03283//heat shock 70kDa protein 1/8;K07466//replication factor A1;K13414//mitogen-activated protein kinase kinase kinase 1 [EC:2.7.11.25];K19613//leucine-rich repeat protein SHOC2	gi|828327668|ref|XP_012573917.1|//PREDICTED: TMV resistance protein N-like [Cicer arietinum]
Aradu.033ZK	2525	64.05	1666.39	-3.94818	7.83841e-276	Down	NA	NA	NA	K05909//laccase [EC:1.10.3.2];K18674//N-acetylgalactosamine kinase [EC:2.7.1.157];K14300//nuclear pore complex protein Nup133;K02948//small subunit ribosomal protein S11	gi|460382784|ref|XP_004237116.1|//PREDICTED: uncharacterized protein LOC101254990 [Solanum lycopersicum];gi|723689023|ref|XP_010319213.1|//PREDICTED: uncharacterized protein LOC101255289 [Solanum lycopersicum];gi|698501910|ref|XP_009796631.1|//PREDICTED: uncharacterized protein LOC104243175 [Nicotiana sylvestris];gi|698534355|ref|XP_009763829.1|//PREDICTED: uncharacterized protein LOC104215674 [N…
Aradu.03WRD	1572	286.13	223.72	1.10818	2.34986e-18	Up	NA	NA	NA	K04460//serine/threonine-protein phosphatase 5 [EC:3.1.3.16]	gi|645240918|ref|XP_008226828.1|//PREDICTED: LOW QUALITY PROTEIN: uncharacterized protein LOC103326392 [Prunus mume]
Aradu.04E6I	555	1983.39	1504.26	1.15212	5.50052e-125	Up	NA	NA	NA	NA	gi|502153114|ref|XP_004509221.1|//PREDICTED: uncharacterized protein LOC101502801 [Cicer arietinum]
Aradu.055UL	1982	644.18	2809.7	-1.37167	7.9848e-138	Down	NA	NA	NA	NA	gi|955312231|ref|XP_014629290.1|//PREDICTED: uncharacterized protein LOC100800416 [Glycine max]
Aradu.06FCV	504	49.13	30.27	1.45192	4.88439e-06	Up	GO:0022625//cytosolic large ribosomal subunit	GO:0003735//structural constituent of ribosome	GO:1902626//assembly of large subunit precursor of preribosome;GO:0000027//ribosomal large subunit assembly;GO:0006412//translation	K02896//large subunit ribosomal protein L24e	gi|965604874|dbj|BAT92050.1|//hypothetical protein VIGAN_07070800 [Vigna angularis var. angularis]
Aradu.06LYN	2822	605.48	487.83	1.06491	8.92462e-35	Up	NA	NA	NA	NA	gi|734363755|gb|KHN16816.1|//hypothetical protein glysoja_002913 [Glycine soja]
Aradu.0768L	1138	143.05	689.34	-1.51549	2.03942e-40	Down	NA	NA	GO:0065007//biological regulation	NA	gi|357484127|ref|XP_003612350.1|//plant regulator RWP-RK family protein [Medicago truncatula]
Aradu.07NMY	1007	82.63	34.47	2.01453	2.63903e-13	Up	NA	NA	NA	NA	gi|955310062|ref|XP_014628823.1|//PREDICTED: uncharacterized protein At3g50808-like [Glycine max]
Aradu.085I9	1139	3004.41	1547.95	1.70993	0	Up	GO:0010287//plastoglobule;GO:0009535//chloroplast thylakoid membrane;GO:0016021//integral component of membrane;GO:0009941//chloroplast envelope;GO:0009522//photosystem I	GO:0031409//pigment binding;GO:0046872//metal ion binding;GO:0016168//chlorophyll binding	GO:0009768//photosynthesis, light harvesting in photosystem I;GO:0009416//response to light stimulus;GO:0018298//protein-chromophore linkage	K08917//light-harvesting complex II chlorophyll a/b binding protein 6	gi|955075460|ref|NP_001304252.1|//chlorophyll a-b binding protein CP24 10A, chloroplastic [Vigna radiata]
Aradu.08EQ7	1162	18.03	172.13	-2.50182	2.14381e-20	Down	NA	NA	NA	NA	NA
Aradu.08GEE	3209	88.02	398.2	-1.42438	4.55397e-22	Down	GO:0043231//intracellular membrane-bounded organelle;GO:0016021//integral component of membrane	GO:0005524//ATP binding;GO:0042626//ATPase activity, coupled to transmembrane movement of substances	GO:0055085//transmembrane transport;GO:0006869//lipid transport	K05643//ATP-binding cassette, subfamily A (ABC1), member 3;K05641//ATP-binding cassette, subfamily A (ABC1), member 1	gi|734399312|gb|KHN30818.1|//ABC transporter A family member 7 [Glycine soja]
Aradu.08H0Q	405	196.56	98.96	1.74326	1.95504e-24	Up	NA	NA	NA	NA	gi|593786801|ref|XP_007156441.1|//hypothetical protein PHAVU_003G286300g [Phaseolus vulgaris]
Aradu.09RWH	708	8	140.42	-3.3804	3.08027e-22	Down	NA	GO:0008908//isochorismatase activity	GO:0008152//metabolic process	K17604//zinc finger SWIM domain-containing protein 3	gi|351721482|ref|NP_001235163.1|//uncharacterized protein LOC100499982 [Glycine max]
Aradu.0A8NK	2112	92.32	337.87	-1.11855	1.5349e-13	Down	GO:0016021//integral component of membrane	GO:0016491//oxidoreductase activity	GO:0055114//oxidation-reduction process	K13081//leucoanthocyanidin reductase [EC:1.17.1.3]	gi|357483525|ref|XP_003612049.1|//phenylcoumaran benzylic ether reductase-like protein Fi1 [Medicago truncatula]
Aradu.0B0KP	1552	386.42	261.71	1.31541	3.17248e-31	Up	GO:0016020//membrane	NA	NA	NA	gi|703115567|ref|XP_010100924.1|//Hypersensitive-induced response protein 1 [Morus notabilis]
Aradu.0C27S	903	45.48	488.79	-2.6727	6.63325e-59	Down	GO:0016021//integral component of membrane	GO:0051119//sugar transmembrane transporter activity	GO:0034219//carbohydrate transmembrane transport	K15382//solute carrier family 50 (sugar transporter)	gi|356546214|ref|XP_003541525.1|//PREDICTED: bidirectional sugar transporter SWEET3-like [Glycine max]
Aradu.0D4S6	665	677.76	292.04	1.96782	2.68048e-94	Up	GO:0016021//integral component of membrane	GO:0004674//protein serine/threonine kinase activity;GO:0005524//ATP binding	GO:0006468//protein phosphorylation	NA	gi|356509310|ref|XP_003523393.1|//PREDICTED: receptor-like protein kinase 2 [Glycine max];gi|593328248|ref|XP_007137551.1|//hypothetical protein PHAVU_009G136200g [Phaseolus vulgaris]
Aradu.0F2PN	579	390.66	279.62	1.23565	8.98573e-29	Up	NA	NA	NA	NA	gi|351721079|ref|NP_001235150.1|//uncharacterized protein LOC100499981 [Glycine max]
Aradu.0G8MU	3460	953.92	3347.56	-1.05796	3.13638e-109	Down	GO:0005618//cell wall;GO:0005773//vacuole	GO:0030246//carbohydrate binding;GO:0004565//beta-galactosidase activity	GO:0005975//carbohydrate metabolic process	K12309//beta-galactosidase [EC:3.2.1.23]	gi|356526021|ref|XP_003531618.1|//PREDICTED: beta-galactosidase 1-like [Glycine max]
Aradu.0H2VD	1692	132.07	580.72	-1.38333	3.90967e-30	Down	NA	NA	NA	K08494//novel plant SNARE;K15378//solute carrier family 45, member 1/2/4	gi|922351707|ref|XP_013451670.1|//sucrose proton symporter 2 [Medicago truncatula];gi|950930476|ref|XP_014504492.1|//PREDICTED: sucrose transport protein SUC8-like [Vigna radiata var. radiata]
Aradu.0HV8G	621	16	84	-1.63911	5.79406e-07	Down	GO:0009570//chloroplast stroma	GO:0008270//zinc ion binding;GO:0004399//histidinol dehydrogenase activity;GO:0051287//NAD binding	GO:0009555//pollen development;GO:0000105//histidine biosynthetic process;GO:0055114//oxidation-reduction process	K00013//histidinol dehydrogenase [EC:1.1.1.23]	gi|356524921|ref|XP_003531076.1|//PREDICTED: histidinol dehydrogenase, chloroplastic-like [Glycine max]
Aradu.0IR2T	1257	619.68	176	2.56915	6.65583e-119	Up	GO:0016020//membrane	NA	NA	K04733//interleukin-1 receptor-associated kinase 4 [EC:2.7.11.1]	gi|356544806|ref|XP_003540838.1|//PREDICTED: thaumatin-like protein 1b [Glycine max]
Aradu.0IY72	293	15	3	3.07513	4.48173e-05	Up	NA	NA	NA	NA	NA
Aradu.0J3SA	730	0	218.34	-8.01723	9.53377e-38	Down	GO:0005634//nucleus;GO:0005737//cytoplasm	GO:0010427//abscisic acid binding;GO:0004864//protein phosphatase inhibitor activity;GO:0004872//receptor activity	GO:0080163//regulation of protein serine/threonine phosphatase activity;GO:0009738//abscisic acid-activated signaling pathway;GO:0006952//defense response;GO:0043086//negative regulation of catalytic activity;GO:0009607//response to biotic stimulus	NA	gi|169786740|gb|ACA79908.1|//Ara h 8 allergen isoform 3 [Arachis hypogaea]
Aradu.0L3H6	1454	2	426.53	-6.9833	3.10443e-78	Down	GO:0005634//nucleus;GO:0016021//integral component of membrane	GO:0016301//kinase activity	GO:0016310//phosphorylation;GO:0006334//nucleosome assembly	K11279//nucleosome assembly protein 1-like 1	gi|658027551|ref|XP_008349203.1|//PREDICTED: probable LRR receptor-like serine/threonine-protein kinase At4g36180 [Malus domestica];gi|920696679|gb|KOM39904.1|//hypothetical protein LR48_Vigan04g010200 [Vigna angularis]
Aradu.0M8VI	2213	294.35	1149.1	-1.21169	1.52006e-47	Down	NA	GO:0016787//hydrolase activity	GO:0016042//lipid catabolic process	NA	gi|951026238|ref|XP_014513869.1|//PREDICTED: patatin-like protein 6 [Vigna radiata var. radiata]
Aradu.0N518	420	169	92	1.63052	1.79574e-19	Up	GO:0009506//plasmodesma	GO:0004871//signal transducer activity	GO:0019722//calcium-mediated signaling	NA	gi|947129154|gb|KRH77008.1|//hypothetical protein GLYMA_01G186800 [Glycine max]
Aradu.0NY83	1882	188.48	856.73	-1.43122	6.83548e-46	Down	NA	GO:0003743//translation initiation factor activity;GO:0004004//ATP-dependent RNA helicase activity;GO:0005524//ATP binding;GO:0004386//helicase activity;GO:0003676//nucleic acid binding	GO:0006413//translational initiation;GO:0010468//regulation of gene expression;GO:0010501//RNA secondary structure unwinding	K03257//translation initiation factor 4A	gi|567922122|ref|XP_006453067.1|//hypothetical protein CICLE_v10008468mg [Citrus clementina];gi|747040823|ref|XP_011100200.1|//PREDICTED: eukaryotic initiation factor 4A-14 [Sesamum indicum]
Aradu.0UT4V	649	298	131	1.93895	1.41148e-41	Up	NA	NA	NA	NA	NA
Aradu.0VN2L	1330	72	314.58	-1.37415	6.24047e-17	Down	GO:0016021//integral component of membrane;GO:0005886//plasma membrane	GO:0022857//transmembrane transporter activity	GO:0055085//transmembrane transport	K07874//Ras-related protein Rab-1A;K00801//farnesyl-diphosphate farnesyltransferase [EC:2.5.1.21]	gi|356535430|ref|XP_003536248.1|//PREDICTED: WAT1-related protein At5g07050 isoform X1 [Glycine max]
Aradu.0VP21	2127	729.39	3406.04	-1.47013	5.60449e-185	Down	GO:0000145//exocyst	NA	GO:0006887//exocytosis	K07195//exocyst complex component 7	gi|357437557|ref|XP_003589054.1|//exocyst subunit exo70 family protein [Medicago truncatula];gi|356562235|ref|XP_003549377.1|//PREDICTED: exocyst complex component EXO70A1-like [Glycine max]
Aradu.0Y2ZI	2214	646.18	413.5	1.39726	6.7385e-56	Up	NA	GO:0004674//protein serine/threonine kinase activity;GO:0005524//ATP binding	GO:0006468//protein phosphorylation	K00924	gi|502182770|ref|XP_004516992.1|//PREDICTED: probable receptor-like protein kinase At5g47070 [Cicer arietinum]
Aradu.0Z207	1137	73	37	1.73358	4.60888e-10	Up	GO:0005737//cytoplasm	GO:0005506//iron ion binding;GO:0050113//inositol oxygenase activity	GO:0019310//inositol catabolic process;GO:0055114//oxidation-reduction process	K00469//inositol oxygenase [EC:1.13.99.1]	gi|357520775|ref|XP_003630676.1|//myo-inositol oxygenase [Medicago truncatula]
Aradu.0ZI26	629	85.01	47.52	1.5923	2.50034e-10	Up	NA	NA	NA	NA	NA
Aradu.11776	774	702.85	363.64	1.70391	1.42482e-80	Up	GO:0016020//membrane;GO:0005618//cell wall;GO:0005576//extracellular region	NA	GO:0009664//plant-type cell wall organization	K20628//expansin	gi|356567718|ref|XP_003552064.1|//PREDICTED: expansin-A4 [Glycine max]
Aradu.11RIW	5784	1201.02	873.46	1.21265	1.22393e-82	Up	GO:0016021//integral component of membrane	GO:0005524//ATP binding;GO:0004714//transmembrane receptor protein tyrosine kinase activity	GO:0018108//peptidyl-tyrosine phosphorylation	K04733//interleukin-1 receptor-associated kinase 4 [EC:2.7.11.1];K20718//LRR receptor-like serine/threonine-protein kinase ERECTA [EC:2.7.11.1];K04730//interleukin-1 receptor-associated kinase 1 [EC:2.7.11.1];K13420//LRR receptor-like serine/threonine-protein kinase FLS2 [EC:2.7.11.1]	gi|571518228|ref|XP_006597660.1|//PREDICTED: probable LRR receptor-like serine/threonine-protein kinase At4g20940 [Glycine max]
Aradu.130HL	3003	724.48	435.11	1.48877	1.49798e-68	Up	GO:0005730//nucleolus;GO:0005681//spliceosomal complex;GO:0005688//U6 snRNP;GO:0005732//small nucleolar ribonucleoprotein complex;GO:0000932//P-body;GO:0019013//viral nucleocapsid;GO:0046540//U4/U6 x U5 tri-snRNP complex	GO:0003723//RNA binding	GO:0006511//ubiquitin-dependent protein catabolic process;GO:0000398//mRNA splicing, via spliceosome;GO:0030490//maturation of SSU-rRNA	K06700//proteasome inhibitor subunit 1 (PI31);K12625//U6 snRNA-associated Sm-like protein LSm6	gi|645220413|ref|XP_008240153.1|//PREDICTED: probable proteasome inhibitor [Prunus mume];gi|947063043|gb|KRH12304.1|//hypothetical protein GLYMA_15G165200 [Glycine max];gi|901813964|gb|KMZ68383.1|//U6 snRNA-associated Sm-like protein LSm6 [Zostera marina]
Aradu.1410G	438	154	109	1.25181	1.40642e-12	Up	NA	NA	NA	NA	gi|947129051|gb|KRH76905.1|//hypothetical protein GLYMA_01G1804001, partial [Glycine max]
Aradu.14I2M	2749	17	3725.88	-7.0227	0	Down	GO:0005634//nucleus	NA	NA	K18811//cyclin D5, plant	gi|920699003|gb|KOM42228.1|//hypothetical protein LR48_Vigan04g242600 [Vigna angularis]
Aradu.158JQ	365	52	26	1.75321	9.57009e-08	Up	GO:0009507//chloroplast	GO:0033854//glutamate-prephenate aminotransferase activity;GO:0033853//aspartate-prephenate aminotransferase activity;GO:0080130//L-phenylalanine:2-oxoglutarate aminotransferase activity;GO:0042802//identical protein binding;GO:0004069//L-aspartate:2-oxoglutarate aminotransferase activity;GO:0030170//pyridoxal phosphate binding	GO:0009094//L-phenylalanine biosynthetic process	K15849//bifunctional aspartate aminotransferase and glutamate/aspartate-prephenate aminotransferase [EC:2.6.1.1 2.6.1.78 2.6.1.79]	gi|947111070|gb|KRH59396.1|//hypothetical protein GLYMA_05G181000 [Glycine max]
Aradu.15BQ1	1637	534.02	418.73	1.10408	1.24517e-32	Up	NA	GO:0030246//carbohydrate binding;GO:0004034//aldose 1-epimerase activity	GO:0019318//hexose metabolic process	K01785//aldose 1-epimerase [EC:5.1.3.3]	gi|356531788|ref|XP_003534458.1|//PREDICTED: aldose 1-epimerase-like [Glycine max]
Aradu.161N3	1312	205.9	145.59	1.25324	2.83469e-16	Up	GO:0016021//integral component of membrane	NA	GO:0006810//transport	K15287//solute carrier family 35, member F1/2	gi|357511003|ref|XP_003625790.1|//UAA transporter family protein [Medicago truncatula]
Aradu.168L7	3540	652.96	3818.8	-1.79485	1.56626e-275	Down	NA	GO:0043531//ADP binding	GO:0006952//defense response	K13457//disease resistance protein RPM1	gi|571478628|ref|XP_006587620.1|//PREDICTED: disease resistance protein RPM1-like [Glycine max];gi|743848498|ref|XP_011028248.1|//PREDICTED: uncharacterized protein LOC105128333 [Populus euphratica]
Aradu.1733C	682	68	47	1.28608	1.07582e-06	Up	GO:0005751//mitochondrial respiratory chain complex IV	GO:0004129//cytochrome-c oxidase activity	GO:1902600//hydrogen ion transmembrane transport;GO:0055114//oxidation-reduction process	K02266//cytochrome c oxidase subunit 6a	gi|728844034|gb|KHG23477.1|//Cytochrome c oxidase subunit 6a, mitochondrial -like protein [Gossypium arboreum];gi|947109854|gb|KRH58180.1|//hypothetical protein GLYMA_05G110100 [Glycine max]
Aradu.17B05	2281	642.04	368.86	1.5528	9.89705e-65	Up	GO:0005618//cell wall	GO:0004252//serine-type endopeptidase activity	GO:0006508//proteolysis	K04733//interleukin-1 receptor-associated kinase 4 [EC:2.7.11.1];K09490//heat shock 70kDa protein 5;K13199//plasminogen activator inhibitor 1 RNA-binding protein;K01183//chitinase [EC:3.2.1.14]	gi|356530435|ref|XP_003533787.1|//PREDICTED: subtilisin-like protease SBT1.7 [Glycine max]
Aradu.17DUP	418	89	350.51	-1.22437	6.87006e-16	Down	GO:0005634//nucleus	GO:0005515//protein binding;GO:0043565//sequence-specific DNA binding;GO:0003700//transcription factor activity, sequence-specific DNA binding	GO:0009733//response to auxin;GO:1902459//positive regulation of stem cell population maintenance	K18490//homeobox protein OTX2;K09326//homeobox protein OTX1	gi|356499151|ref|XP_003518406.1|//PREDICTED: WUSCHEL-related homeobox 5-like [Glycine max]
Aradu.182MN	1937	461.64	2371.14	-1.60753	4.15492e-147	Down	GO:0016021//integral component of membrane	GO:0005215//transporter activity	GO:0055085//transmembrane transport	NA	gi|356534433|ref|XP_003535759.1|//PREDICTED: hippocampus abundant transcript-like protein 1 [Glycine max]
Aradu.183XK	1733	336.86	258.16	1.13709	3.80036e-22	Up	GO:0005794//Golgi apparatus	GO:0016413//O-acetyltransferase activity	GO:0071554//cell wall organization or biogenesis	K04427//mitogen-activated protein kinase kinase kinase 7 [EC:2.7.11.25];K16573//gamma-tubulin complex component 6	gi|593692474|ref|XP_007146779.1|//hypothetical protein PHAVU_006G069200g [Phaseolus vulgaris]
Aradu.199XC	1899	90.09	351.07	-1.20911	1.24101e-15	Down	NA	NA	NA	NA	gi|965659400|dbj|BAT75819.1|//hypothetical protein VIGAN_01374300 [Vigna angularis var. angularis]
Aradu.19W8X	2585	229.61	938.38	-1.27778	2.19372e-42	Down	GO:0031969//chloroplast membrane	GO:0005525//GTP binding;GO:0003824//catalytic activity	GO:0010228//vegetative to reproductive phase transition of meristem;GO:0010027//thylakoid membrane organization	NA	gi|356536771|ref|XP_003536908.1|//PREDICTED: probable transmembrane GTPase FZO-like, chloroplastic [Glycine max]
Aradu.19YSM	1666	849.14	3477.03	-1.28057	2.95393e-153	Down	GO:0016021//integral component of membrane	GO:0016740//transferase activity	NA	K08176//MFS transporter, PHS family, inorganic phosphate transporter;K03509//DNA polymerase eta [EC:2.7.7.7];K13675//UDP-glucose:O-linked fucose beta-1,3-glucosyltransferase [EC:2.4.1.-]	gi|357507459|ref|XP_003624018.1|//transferring glycosyl group transferase [Medicago truncatula]
Aradu.1A39F	1641	525.24	351.99	1.33065	1.43392e-42	Up	NA	GO:0046872//metal ion binding;GO:0003676//nucleic acid binding	NA	K14794//ribosomal RNA-processing protein 12;K15340//DNA cross-link repair 1A protein;K12309//beta-galactosidase [EC:3.2.1.23]	gi|502117153|ref|XP_004495721.1|//PREDICTED: protein indeterminate-domain 2-like [Cicer arietinum]
Aradu.1AK6N	2158	3786.92	2387	1.41903	0	Up	GO:0005774//vacuolar membrane;GO:0016021//integral component of membrane;GO:0005886//plasma membrane	GO:0016614//oxidoreductase activity, acting on CH-OH group of donors;GO:0050614//delta24-sterol reductase activity;GO:0050660//flavin adenine dinucleotide binding;GO:0005516//calmodulin binding	GO:0009826//unidimensional cell growth;GO:0016132//brassinosteroid biosynthetic process;GO:0009834//plant-type secondary cell wall biogenesis;GO:0055114//oxidation-reduction process;GO:0009808//lignin metabolic process	K09828//Delta24-sterol reductase [EC:1.3.1.72 1.3.1.-]	gi|356544574|ref|XP_003540724.1|//PREDICTED: delta(24)-sterol reductase [Glycine max]
Aradu.1D34I	1503	244.23	2003.45	-2.28297	7.30526e-198	Down	NA	GO:0016985//mannan endo-1,4-beta-mannosidase activity	GO:0046355//mannan catabolic process	K19355//mannan endo-1,4-beta-mannosidase [EC:3.2.1.78]	gi|356572868|ref|XP_003554587.1|//PREDICTED: mannan endo-1,4-beta-mannosidase 4-like [Glycine max]
Aradu.1G3YF	3020	1173.2	700.76	1.49666	6.81044e-111	Up	GO:0005618//cell wall	GO:0004252//serine-type endopeptidase activity	GO:0006508//proteolysis	K04733//interleukin-1 receptor-associated kinase 4 [EC:2.7.11.1];K09490//heat shock 70kDa protein 5;K13199//plasminogen activator inhibitor 1 RNA-binding protein;K01183//chitinase [EC:3.2.1.14]	gi|356545774|ref|XP_003541310.1|//PREDICTED: subtilisin-like protease SBT1.7 [Glycine max]
Aradu.1GZ32	1455	6.17	347.44	-5.06214	1.96673e-65	Down	GO:0005886//plasma membrane	GO:0022857//transmembrane transporter activity	GO:0006810//transport	K07874//Ras-related protein Rab-1A;K00801//farnesyl-diphosphate farnesyltransferase [EC:2.5.1.21]	gi|922328737|ref|XP_003626704.2|//nodulin MtN21/EamA-like transporter family protein [Medicago truncatula];gi|571448010|ref|XP_006577653.1|//PREDICTED: WAT1-related protein At4g30420-like [Glycine max]
Aradu.1I9MZ	656	130.67	103.44	1.09034	4.24532e-09	Up	GO:0016021//integral component of membrane	NA	NA	NA	gi|357481847|ref|XP_003611209.1|//ycf49-like protein [Medicago truncatula]
Aradu.1KA4U	872	788	1	10.3753	3.01975e-164	Up	NA	NA	NA	NA	NA
Aradu.1M284	751	0	47	-5.80138	1.95294e-10	Down	NA	NA	NA	NA	NA
Aradu.1M2X1	1101	167.79	97.14	1.54173	5.75985e-18	Up	GO:0010287//plastoglobule;GO:0009535//chloroplast thylakoid membrane;GO:0009523//photosystem II;GO:0016021//integral component of membrane;GO:0009941//chloroplast envelope;GO:0009522//photosystem I	GO:0031409//pigment binding;GO:0046872//metal ion binding;GO:0016168//chlorophyll binding	GO:0009768//photosynthesis, light harvesting in photosystem I;GO:0009416//response to light stimulus;GO:0018298//protein-chromophore linkage	K08913//light-harvesting complex II chlorophyll a/b binding protein 2	gi|359806053|ref|NP_001241179.1|//uncharacterized protein LOC100815789 [Glycine max]
Aradu.1NF8G	993	80	1	7.07513	1.01988e-25	Up	NA	NA	GO:0008152//metabolic process	K03809//NAD(P)H dehydrogenase (quinone) [EC:1.6.5.2]	gi|12484052|gb|AAG53945.1|AF304462_1//quinone-oxidoreductase QR2 [Triphysaria versicolor];gi|388497574|gb|AFK36853.1|//unknown [Medicago truncatula]
Aradu.1P5T5	345	49.81	30.37	1.467	3.62996e-06	Up	NA	NA	NA	K13195//cold-inducible RNA-binding protein	gi|947103146|gb|KRH51529.1|//hypothetical protein GLYMA_06G012600 [Glycine max]
Aradu.1RN6D	2001	694.49	530.94	1.14061	4.13193e-44	Up	GO:0016021//integral component of membrane	GO:0005524//ATP binding;GO:0004672//protein kinase activity	GO:0006468//protein phosphorylation	K00924;K02939//large subunit ribosomal protein L9	gi|955309066|ref|XP_003518489.3|//PREDICTED: leucine-rich repeat receptor-like serine/threonine-protein kinase BAM3 [Glycine max];gi|502119677|ref|XP_004496702.1|//PREDICTED: transcription factor CYCLOIDEA-like [Cicer arietinum];gi|593666322|ref|XP_007143293.1|//hypothetical protein PHAVU_007G060100g [Phaseolus vulgaris]
Aradu.1SK9N	1304	555.3	2574.64	-1.45982	9.85697e-139	Down	NA	NA	NA	K04733//interleukin-1 receptor-associated kinase 4 [EC:2.7.11.1];K03868//RING-box protein 1	gi|502121267|ref|XP_004497247.1|//PREDICTED: GEM-like protein 4 [Cicer arietinum]
Aradu.1T3UD	1163	11498.7	7188.39	1.43093	0	Up	GO:0016021//integral component of membrane	NA	NA	K02883//large subunit ribosomal protein L18e;K11855//ubiquitin carboxyl-terminal hydrolase 36/42 [EC:3.4.19.12]	gi|593784025|ref|XP_007155053.1|//hypothetical protein PHAVU_003G169100g [Phaseolus vulgaris];gi|950995729|ref|XP_014505493.1|//PREDICTED: 36.4 kDa proline-rich protein [Vigna radiata var. radiata]
Aradu.1UD0G	505	25	111	-1.39735	3.37607e-07	Down	NA	NA	NA	NA	gi|1754977|gb|AAB39473.1|//Em protein [Robinia pseudoacacia]
Aradu.1V6RE	4519	155.14	8001.1	-4.93535	0	Down	NA	GO:0008289//lipid binding	NA	K07466//replication factor A1	gi|922329455|ref|XP_003628568.2|//replication factor-A carboxy-terminal domain protein [Medicago truncatula];gi|922395953|ref|XP_003590846.2|//replication factor-A carboxy-terminal domain protein [Medicago truncatula];gi|955303118|ref|XP_014630792.1|//PREDICTED: protein ENHANCED DISEASE RESISTANCE 2-like isoform X5 [Glycine max]
Aradu.1W9KV	1293	132.76	66.71	1.74605	4.45577e-17	Up	NA	GO:0016788//hydrolase activity, acting on ester bonds	NA	K21026//acetylajmaline esterase [EC:3.1.1.80];K01188//beta-glucosidase [EC:3.2.1.21];K00679//phospholipid:diacylglycerol acyltransferase [EC:2.3.1.158];K10960//geranylgeranyl diphosphate/geranylgeranyl-bacteriochlorophyllide a reductase [EC:1.3.1.83 1.3.1.111]	gi|593695173|ref|XP_007148085.1|//hypothetical protein PHAVU_006G179500g [Phaseolus vulgaris]
Aradu.1ZR6L	888	95.43	531.03	-1.72307	1.41922e-37	Down	GO:0016021//integral component of membrane	NA	NA	NA	gi|734387567|gb|KHN25330.1|//Transmembrane protein 45B [Glycine soja]
Aradu.1ZX4A	435	157.92	75	1.82744	3.45497e-21	Up	NA	NA	NA	NA	gi|357442399|ref|XP_003591477.1|//leguminosin group486 secreted peptide [Medicago truncatula]
Aradu.20BW4	531	13517	10867	1.06803	0	Up	NA	NA	NA	K13449//pathogenesis-related protein 1;K20412//peptidase inhibitor 16	gi|951006821|ref|XP_014508557.1|//PREDICTED: STS14 protein-like [Vigna radiata var. radiata]
Aradu.23DFM	1453	1262.8	937.37	1.18314	1.51793e-83	Up	NA	NA	NA	NA	gi|823216501|ref|XP_012440965.1|//PREDICTED: uncharacterized protein LOC105766164 [Gossypium raimondii];gi|922327155|ref|XP_013442970.1|//hypothetical protein MTR_0055s0130 [Medicago truncatula];gi|947068959|gb|KRH17850.1|//hypothetical protein GLYMA_13G021500 [Glycine max]
Aradu.23I92	1269	429.92	339.25	1.09493	2.92145e-26	Up	GO:0043231//intracellular membrane-bounded organelle	GO:0080043//quercetin 3-O-glucosyltransferase activity;GO:0080044//quercetin 7-O-glucosyltransferase activity	GO:0009813//flavonoid biosynthetic process;GO:0052696//flavonoid glucuronidation	K13496//UDP-glucosyl transferase 73C [EC:2.4.1.-]	gi|922369414|ref|XP_013456871.1|//flavonoid glucosyltransferase [Medicago truncatula]
Aradu.23XWK	1328	630.79	375.96	1.49979	1.54822e-60	Up	NA	GO:0005544//calcium-dependent phospholipid binding;GO:0005509//calcium ion binding	NA	K17095//annexin A7/11	gi|734386930|gb|KHN25117.1|//Annexin-like protein RJ4 [Glycine soja]
Aradu.24BNI	1308	718.48	0	11.242	1.6442e-130	Up	NA	NA	NA	K15223//upstream activation factor subunit UAF30	gi|356537694|ref|XP_003537360.1|//PREDICTED: upstream activation factor subunit spp27-like [Glycine max]
Aradu.24LYY	856	95	25	2.67921	1.86445e-20	Up	NA	NA	NA	NA	gi|955322782|ref|XP_014631583.1|//PREDICTED: uncharacterized protein LOC100784047 [Glycine max]
Aradu.251WJ	2187	10.97	191.31	-3.37107	1.24299e-29	Down	NA	NA	NA	K08592//sentrin-specific protease 1 [EC:3.4.22.68]	gi|357484057|ref|XP_003612315.1|//Ulp1 protease family, carboxy-terminal domain protein [Medicago truncatula]
Aradu.25598	1943	148.95	622.37	-1.30974	1.0086e-29	Down	NA	GO:0046872//metal ion binding;GO:0051213//dioxygenase activity	GO:0055114//oxidation-reduction process	K05278//flavonol synthase [EC:1.14.11.23]	gi|356524814|ref|XP_003531023.1|//PREDICTED: probable 2-oxoglutarate/Fe(II)-dependent dioxygenase [Glycine max]
Aradu.259PC	2445	2918.86	1523.44	1.69128	0	Up	NA	NA	NA	K13425//WRKY transcription factor 22;K13459//disease resistance protein RPS2;K16225//probable WRKY transcription factor 52	gi|951010337|ref|XP_014509525.1|//PREDICTED: probable WRKY transcription factor 41 [Vigna radiata var. radiata]
Aradu.25I0S	2600	274	1082	-1.22825	8.45427e-46	Down	GO:0016020//membrane	NA	NA	NA	gi|734402074|gb|KHN31853.1|//hypothetical protein glysoja_036171 [Glycine soja];gi|593700843|ref|XP_007150841.1|//hypothetical protein PHAVU_005G185400g [Phaseolus vulgaris]
Aradu.269AF	2041	339.86	282.59	1.01944	5.7723e-19	Up	NA	GO:0004185//serine-type carboxypeptidase activity;GO:0016747//transferase activity, transferring acyl groups other than amino-acyl groups	GO:0051603//proteolysis involved in cellular protein catabolic process;GO:0019748//secondary metabolic process	K16297//serine carboxypeptidase-like clade II [EC:3.4.16.-]	gi|922378007|ref|XP_013459243.1|//serine carboxypeptidase-like protein [Medicago truncatula];gi|593689750|ref|XP_007145476.1|//hypothetical protein PHAVU_007G242200g [Phaseolus vulgaris];gi|571482595|ref|XP_006589008.1|//PREDICTED: serine carboxypeptidase-like 45 [Glycine max]
Aradu.26PK0	1153	347.54	290.87	1.01001	4.35909e-19	Up	GO:0044434//chloroplast part;GO:0005763//mitochondrial small ribosomal subunit;GO:0022627//cytosolic small ribosomal subunit;GO:0009579//thylakoid	GO:0003735//structural constituent of ribosome	GO:0006412//translation	K02988//small subunit ribosomal protein S5	gi|356521382|ref|XP_003529335.1|//PREDICTED: 30S ribosomal protein S5, chloroplastic-like [Glycine max]
Aradu.26XAX	720	1199.8	5431.18	-1.42527	7.71343e-281	Down	NA	NA	GO:0050896//response to stimulus	NA	gi|571440475|ref|XP_003519004.2|//PREDICTED: MLP-like protein 43 [Glycine max]
Aradu.272PC	1293	506.43	212.03	2.0093	8.90058e-73	Up	GO:0016020//membrane	NA	NA	NA	gi|356508051|ref|XP_003522775.1|//PREDICTED: purine permease 1-like [Glycine max]
Aradu.295V7	1930	363.61	1391.99	-1.18348	3.2646e-55	Down	GO:0016021//integral component of membrane	GO:0015171//amino acid transmembrane transporter activity	GO:0003333//amino acid transmembrane transport	K15015//solute carrier family 32 (vesicular inhibitory amino acid transporter)	gi|356531770|ref|XP_003534449.1|//PREDICTED: vacuolar amino acid transporter 1-like isoform X1 [Glycine max];gi|734348030|gb|KHN11608.1|//Vacuolar amino acid transporter 1 [Glycine soja]
Aradu.29BG8	1973	159	3	6.48113	5.83232e-51	Up	NA	NA	NA	K09519//DnaJ homolog subfamily B member 13	gi|922388384|ref|XP_013462722.1|//Ulp1 protease family, carboxy-terminal domain protein [Medicago truncatula]
Aradu.29HGX	1496	44.86	549.56	-2.86157	8.97643e-71	Down	GO:0016020//membrane;GO:0070449//elongin complex	NA	GO:0006368//transcription elongation from RNA polymerase II promoter	K00844//hexokinase [EC:2.7.1.1]	gi|965601439|dbj|BAT88617.1|//hypothetical protein VIGAN_05215700 [Vigna angularis var. angularis];gi|571451688|ref|XP_006578813.1|//PREDICTED: probable mediator of RNA polymerase II transcription subunit 26c isoform X2 [Glycine max];gi|947105456|gb|KRH53839.1|//hypothetical protein GLYMA_06G149200 [Glycine max]
Aradu.2A2BJ	962	124	3	6.12244	1.64402e-40	Up	GO:0000502//proteasome complex	NA	NA	K03036//26S proteasome regulatory subunit N6	gi|593306080|ref|XP_007137150.1|//hypothetical protein PHAVU_009G104000g [Phaseolus vulgaris]
Aradu.2CH60	299	60	43	1.23383	7.99316e-06	Up	NA	NA	NA	NA	NA
Aradu.2CJ52	1293	771.87	4362.78	-1.74561	9.74417e-303	Down	GO:0016020//membrane;GO:0016021//integral component of membrane	GO:0016491//oxidoreductase activity	GO:0055114//oxidation-reduction process	K08081//tropinone reductase I [EC:1.1.1.206];K00059//3-oxoacyl-[acyl-carrier protein] reductase [EC:1.1.1.100];K11165//dehydrogenase/reductase SDR family member 7 [EC:1.1.-.-];K09841//xanthoxin dehydrogenase [EC:1.1.1.288]	gi|358249360|ref|NP_001239786.1|//uncharacterized protein LOC100808990 [Glycine max];gi|778664825|ref|XP_011660361.1|//PREDICTED: 11-beta-hydroxysteroid dehydrogenase 1B-like [Cucumis sativus];gi|502139623|ref|XP_004503837.1|//PREDICTED: 11-beta-hydroxysteroid dehydrogenase 1B-like [Cicer arietinum]
Aradu.2DC8X	495	765.82	443.39	1.54164	4.11078e-76	Up	GO:0030093//chloroplast photosystem I;GO:0016021//integral component of membrane;GO:0009941//chloroplast envelope	GO:0016168//chlorophyll binding	GO:0009773//photosynthetic electron transport in photosystem I;GO:0009780//photosynthetic NADP+ reduction;GO:0042550//photosystem I stabilization;GO:0050821//protein stabilization	K08905//photosystem I subunit V	gi|502127398|ref|XP_004499692.1|//PREDICTED: photosystem I reaction center subunit V, chloroplastic [Cicer arietinum]
Aradu.2DE36	614	497.11	189.87	2.14176	2.00699e-77	Up	NA	NA	NA	NA	NA
Aradu.2H1GD	1687	578.29	2280.19	-1.22608	1.74836e-94	Down	NA	GO:0046872//metal ion binding;GO:0005506//iron ion binding;GO:0051213//dioxygenase activity	GO:0055114//oxidation-reduction process	K05282//gibberellin 20-oxidase [EC:1.14.11.12]	gi|694430416|ref|XP_009342689.1|//PREDICTED: flavonol synthase/flavanone 3-hydroxylase-like [Pyrus x bretschneideri]
Aradu.2II5H	1824	6016.3	105.83	6.58226	0	Up	GO:0005739//mitochondrion;GO:0009507//chloroplast	GO:0003690//double-stranded DNA binding	GO:0006355//regulation of transcription, DNA-templated	K15032//mTERF domain-containing protein, mitochondrial;K10144//RING finger and CHY zinc finger domain-containing protein 1 [EC:2.3.2.27]	gi|920717937|gb|KOM57134.1|//hypothetical protein LR48_Vigan11g016600 [Vigna angularis];gi|356557195|ref|XP_003546903.1|//PREDICTED: uncharacterized protein LOC100802127 [Glycine max];gi|734363738|gb|KHN16799.1|//BTB/POZ domain-containing protein [Glycine soja]
Aradu.2JQ32	1358	486.62	362.48	1.1781	5.5823e-33	Up	GO:0016020//membrane;GO:0009506//plasmodesma	NA	NA	K04733//interleukin-1 receptor-associated kinase 4 [EC:2.7.11.1]	gi|356513092|ref|XP_003525248.1|//PREDICTED: cysteine-rich repeat secretory protein 12-like [Glycine max]
Aradu.2K10E	2104	342.49	165	1.8068	2.32383e-43	Up	GO:0016021//integral component of membrane	GO:0004674//protein serine/threonine kinase activity;GO:0005524//ATP binding	GO:0006468//protein phosphorylation	K04733//interleukin-1 receptor-associated kinase 4 [EC:2.7.11.1];K04730//interleukin-1 receptor-associated kinase 1 [EC:2.7.11.1]	gi|920705844|gb|KOM49069.1|//hypothetical protein LR48_Vigan07g277300 [Vigna angularis];gi|694390641|ref|XP_009370883.1|//PREDICTED: probable LRR receptor-like serine/threonine-protein kinase At1g06840 [Pyrus x bretschneideri]
Aradu.2K11I	3261	693.03	539.25	1.11517	1.63738e-42	Up	GO:0005634//nucleus	GO:0043565//sequence-specific DNA binding;GO:0003700//transcription factor activity, sequence-specific DNA binding	GO:0006355//regulation of transcription, DNA-templated	K09419//heat shock transcription factor, other eukaryote	gi|951016242|ref|XP_014511066.1|//PREDICTED: heat stress transcription factor A-3-like [Vigna radiata var. radiata];gi|593689272|ref|XP_007145255.1|//hypothetical protein PHAVU_007G223400g [Phaseolus vulgaris];gi|734430949|gb|KHN45684.1|//Heat stress transcription factor A-3 [Glycine soja]
Aradu.2KH9E	2161	138.21	9	4.694	2.04037e-43	Up	NA	NA	NA	K17604//zinc finger SWIM domain-containing protein 3	gi|764638806|ref|XP_004306860.2|//PREDICTED: uncharacterized protein LOC101300183 [Fragaria vesca subsp. vesca]
Aradu.2LH1B	3079	2079.16	10810.4	-1.62514	0	Down	NA	GO:0005524//ATP binding	GO:0019538//protein metabolic process	K03695//ATP-dependent Clp protease ATP-binding subunit ClpB	gi|702496407|ref|XP_010037232.1|//PREDICTED: chaperone protein ClpB1 [Eucalyptus grandis]
Aradu.2NE99	1615	87	326	-1.15258	1.09313e-13	Down	NA	NA	NA	K15397//3-ketoacyl-CoA synthase [EC:2.3.1.199];K20476//RAB6A-GEF complex partner protein 1;K15280//solute carrier family 35, member C2	gi|342365812|gb|AEL30346.1|//WD40-like protein [Arachis hypogaea]
Aradu.2NI45	1713	204.62	727.21	-1.07622	1.14618e-25	Down	NA	GO:0004805//trehalose-phosphatase activity	GO:0005992//trehalose biosynthetic process;GO:0016311//dephosphorylation	K01087//trehalose 6-phosphate phosphatase [EC:3.1.3.12]	gi|593801204|ref|XP_007163639.1|//hypothetical protein PHAVU_001G251300g [Phaseolus vulgaris]
Aradu.2NM82	1869	0	134.01	-7.31299	3.49705e-25	Down	NA	NA	NA	K10706//senataxin [EC:3.6.4.-];K20724//transmembrane protein 33;K11968//ariadne-1 [EC:2.3.2.27]	gi|731396583|ref|XP_010652564.1|//PREDICTED: serine/threonine-protein phosphatase 7 long form homolog [Vitis vinifera]
Aradu.2Q562	2174	4093.47	3419.45	1.01277	3.3868e-208	Up	NA	GO:0016836//hydro-lyase activity;GO:0003861//3-isopropylmalate dehydratase activity;GO:0016853//isomerase activity;GO:0051539//4 iron, 4 sulfur cluster binding	GO:0008652//cellular amino acid biosynthetic process	K01703//3-isopropylmalate/(R)-2-methylmalate dehydratase large subunit [EC:4.2.1.33 4.2.1.35]	gi|502122527|ref|XP_004497788.1|//PREDICTED: 3-isopropylmalate dehydratase large subunit-like [Cicer arietinum]
Aradu.2Q6QB	1426	157	55	2.26647	2.62504e-27	Up	GO:0005634//nucleus	NA	GO:0051301//cell division;GO:0007067//mitotic nuclear division	K05868//cyclin B	gi|951054207|ref|XP_014521177.1|//PREDICTED: G2/mitotic-specific cyclin-1 [Vigna radiata var. radiata]
Aradu.2TG90	1136	2764.18	1735.27	1.4249	5.11458e-241	Up	GO:0005737//cytoplasm	GO:0004364//glutathione transferase activity	GO:0006749//glutathione metabolic process;GO:0009407//toxin catabolic process	K00799//glutathione S-transferase [EC:2.5.1.18]	gi|748303053|gb|AJE59685.1|//tau class glutathione S-transferase [Glycine max]
Aradu.2Z93R	4112	1	1709.68	-9.9863	1.33259e-223	Down	NA	NA	NA	K17604//zinc finger SWIM domain-containing protein 3	gi|147765294|emb|CAN77889.1|//hypothetical protein VITISV_003778 [Vitis vinifera];gi|147787970|emb|CAN62918.1|//hypothetical protein VITISV_029735 [Vitis vinifera]
Aradu.31AY0	1759	1	1043	-9.27332	4.51598e-151	Down	GO:0016020//membrane;GO:0009506//plasmodesma;GO:0016021//integral component of membrane;GO:0005886//plasma membrane	GO:0004674//protein serine/threonine kinase activity;GO:0005524//ATP binding;GO:0004672//protein kinase activity	GO:0006468//protein phosphorylation;GO:0042742//defense response to bacterium	K04733//interleukin-1 receptor-associated kinase 4 [EC:2.7.11.1]	gi|920692947|gb|KOM36172.1|//hypothetical protein LR48_Vigan02g232200 [Vigna angularis];gi|590625642|ref|XP_007025939.1|//Cysteine-rich RLK 29 [Theobroma cacao]
Aradu.31IUC	2226	973.33	382.56	2.10045	1.72235e-146	Up	NA	NA	NA	K14487//auxin responsive GH3 gene family	gi|356543199|ref|XP_003540050.1|//PREDICTED: indole-3-acetic acid-amido synthetase GH3.6-like [Glycine max]
Aradu.32LC7	2115	1225.12	136.88	3.91515	0	Up	NA	GO:0004512//inositol-3-phosphate synthase activity	GO:0006021//inositol biosynthetic process;GO:0008654//phospholipid biosynthetic process	K01858//myo-inositol-1-phosphate synthase [EC:5.5.1.4]	gi|84311237|gb|ABC55421.1|//myo-inositol-1-phosphate synthase [Glycine max]
Aradu.32X0N	1614	1765.21	1463.47	1.02365	3.19784e-92	Up	NA	GO:0016787//hydrolase activity	GO:0006629//lipid metabolic process	K16818//phospholipase A1 [EC:3.1.1.32]	gi|502160378|ref|XP_004511725.1|//PREDICTED: phospholipase A1-Ibeta2, chloroplastic-like [Cicer arietinum]
Aradu.32ZUX	1092	147.82	1	7.9609	4.5998e-43	Up	NA	NA	NA	K16222//Dof zinc finger protein DOF5.5	gi|593787606|ref|XP_007156842.1|//hypothetical protein PHAVU_002G022000g [Phaseolus vulgaris]
Aradu.34GQZ	2430	472.41	1776.97	-1.1581	1.03316e-67	Down	NA	GO:0046872//metal ion binding;GO:0030570//pectate lyase activity	GO:0045490//pectin catabolic process	K01728//pectate lyase [EC:4.2.2.2]	gi|823175484|ref|XP_012486133.1|//PREDICTED: probable pectate lyase 4 [Gossypium raimondii];gi|922402313|ref|XP_013468292.1|//pectate lyase family protein [Medicago truncatula]
Aradu.3579H	858	0	550.74	-9.35202	1.09194e-79	Down	GO:0048046//apoplast;GO:0005829//cytosol;GO:0009507//chloroplast	GO:0008964//phosphoenolpyruvate carboxylase activity;GO:0016853//isomerase activity	GO:0006099//tricarboxylic acid cycle;GO:0044723//single-organism carbohydrate metabolic process;GO:0015977//carbon fixation;GO:0015979//photosynthesis;GO:0048366//leaf development;GO:0044281//small molecule metabolic process	K01810//glucose-6-phosphate isomerase [EC:5.3.1.9];K01595//phosphoenolpyruvate carboxylase [EC:4.1.1.31]	gi|590610127|ref|XP_007021728.1|//Phosphoenolpyruvate carboxylase 3 isoform 1 [Theobroma cacao];gi|965662063|dbj|BAT77772.1|//hypothetical protein VIGAN_02036700 [Vigna angularis var. angularis];gi|475622972|gb|EMT32045.1|//Phosphoenolpyruvate carboxylase 1 [Aegilops tauschii]
Aradu.35HVS	2553	326.44	1263.77	-1.19964	2.46709e-51	Down	NA	GO:0009882//blue light photoreceptor activity;GO:0016829//lyase activity	GO:0009785//blue light signaling pathway	K12118//cryptochrome 1	gi|359807220|ref|NP_001240855.1|//cryptochrome-1-like [Glycine max];gi|920704527|gb|KOM47752.1|//hypothetical protein LR48_Vigan07g145600 [Vigna angularis]
Aradu.35U3T	2275	109.29	371.42	-1.01168	9.48677e-13	Down	GO:0044434//chloroplast part;GO:0005576//extracellular region	GO:0008061//chitin binding;GO:0004568//chitinase activity	GO:0006032//chitin catabolic process	K17525//chitinase domain-containing protein 1	gi|217075761|gb|ACJ86240.1|//unknown [Medicago truncatula]
Aradu.3602N	1165	252.34	138.72	1.6164	6.3492e-28	Up	GO:0005737//cytoplasm	GO:0004364//glutathione transferase activity	GO:0006749//glutathione metabolic process;GO:0009407//toxin catabolic process	K00799//glutathione S-transferase [EC:2.5.1.18]	gi|748303053|gb|AJE59685.1|//tau class glutathione S-transferase [Glycine max]
Aradu.36WJI	2989	3575.73	2902.32	1.05424	2.40361e-194	Up	GO:0016021//integral component of membrane	GO:0046556//alpha-L-arabinofuranosidase activity	GO:0046373//L-arabinose metabolic process	K09955//uncharacterized protein	gi|571488512|ref|XP_006590960.1|//PREDICTED: uncharacterized protein LOC100781521 isoform X1 [Glycine max];gi|947080898|gb|KRH29687.1|//hypothetical protein GLYMA_11G131700 [Glycine max]
Aradu.37P6F	1329	142.44	119.53	1.00619	9.02706e-09	Up	GO:0016020//membrane	NA	NA	K02984//small subunit ribosomal protein S3Ae;K13420//LRR receptor-like serine/threonine-protein kinase FLS2 [EC:2.7.11.1]	gi|950995569|ref|XP_014505442.1|//PREDICTED: uncharacterized protein At4g06744-like [Vigna radiata var. radiata]
Aradu.381YR	1328	312.79	19.22	4.77772	7.84479e-97	Up	GO:0044428//nuclear part	GO:0005488//binding	GO:0006606//protein import into nucleus	K08857//NIMA (never in mitosis gene a)-related kinase 1/4/5 [EC:2.7.11.1];K20222//importin-5	gi|734329730|gb|KHN06385.1|//Importin-5 [Glycine soja];gi|955321044|ref|XP_014631180.1|//PREDICTED: importin-5-like isoform X2 [Glycine max];gi|947110609|gb|KRH58935.1|//hypothetical protein GLYMA_05G156900 [Glycine max]
Aradu.38DG2	1258	29	148.19	-1.60012	1.09339e-10	Down	NA	GO:0005506//iron ion binding;GO:0045544//gibberellin 20-oxidase activity	GO:0009908//flower development;GO:0009826//unidimensional cell growth;GO:0009416//response to light stimulus;GO:0055114//oxidation-reduction process;GO:0009740//gibberellic acid mediated signaling pathway;GO:0009686//gibberellin biosynthetic process	K05282//gibberellin 20-oxidase [EC:1.14.11.12]	gi|571475398|ref|XP_006586607.1|//PREDICTED: gibberellin 20-oxidase 1 isoform X1 [Glycine max]
Aradu.38MP3	985	1	129.99	-6.26905	9.76209e-26	Down	GO:0043231//intracellular membrane-bounded organelle;GO:0016021//integral component of membrane;GO:0044444//cytoplasmic part	GO:0016740//transferase activity	NA	NA	gi|734328927|gb|KHN06078.1|//DUF246 domain-containing protein [Glycine soja]
Aradu.38T8A	2898	199.17	831.24	-1.30806	4.52758e-39	Down	GO:0005618//cell wall	GO:0004252//serine-type endopeptidase activity	GO:0006508//proteolysis	K04733//interleukin-1 receptor-associated kinase 4 [EC:2.7.11.1];K13199//plasminogen activator inhibitor 1 RNA-binding protein;K12663//Delta(3,5)-Delta(2,4)-dienoyl-CoA isomerase [EC:5.3.3.-];K01183//chitinase [EC:3.2.1.14]	gi|920688043|gb|KOM32026.1|//hypothetical protein LR48_Vigan01g158200 [Vigna angularis];gi|356531311|ref|XP_003534221.1|//PREDICTED: subtilisin-like protease SBT3.5 isoform X2 [Glycine max];gi|734417339|gb|KHN38839.1|//Subtilisin-like protease [Glycine soja]
Aradu.3967Z	1465	228.15	1359.08	-1.82137	5.38271e-101	Down	NA	NA	NA	K19476//vacuolar protein sorting-associated protein IST1	gi|502081001|ref|XP_004486735.1|//PREDICTED: uncharacterized protein LOC101507745 [Cicer arietinum]
Aradu.39C4U	1922	192.32	824.48	-1.34677	1.79524e-40	Down	NA	NA	NA	K17578//zinc finger CCHC domain-containing protein 9	gi|388510950|gb|AFK43541.1|//unknown [Lotus japonicus];gi|502145506|ref|XP_004506058.1|//PREDICTED: protein N-lysine methyltransferase METTL21A [Cicer arietinum];gi|950940437|ref|XP_014493104.1|//PREDICTED: ribosomal protein L11 methyltransferase isoform X2 [Vigna radiata var. radiata]
Aradu.39G9P	2796	393.31	136.47	2.28029	2.05487e-66	Up	NA	GO:0016747//transferase activity, transferring acyl groups other than amino-acyl groups	NA	K13264//isoflavone 7-O-glucoside-6''-O-malonyltransferase [EC:2.3.1.115]	gi|356568766|ref|XP_003552581.1|//PREDICTED: phenolic glucoside malonyltransferase 1-like [Glycine max]
Aradu.3BK8I	1008	98.02	1001.12	-2.59919	1.74752e-115	Down	GO:0005634//nucleus	GO:0016787//hydrolase activity	GO:0090501//RNA phosphodiester bond hydrolysis;GO:0009909//regulation of flower development;GO:0009416//response to light stimulus	K03539//ribonuclease P/MRP protein subunit RPP1 [EC:3.1.26.5]	gi|571486931|ref|XP_006590510.1|//PREDICTED: uncharacterized protein LOC100786853 isoform X2 [Glycine max];gi|593790946|ref|XP_007158512.1|//hypothetical protein PHAVU_002G158500g [Phaseolus vulgaris]
Aradu.3BS48	1656	108	14.33	3.66713	4.37711e-30	Up	NA	NA	NA	K06966//uncharacterized protein	gi|593692046|ref|XP_007146565.1|//hypothetical protein PHAVU_006G051400g [Phaseolus vulgaris];gi|543176552|gb|AGV54299.1|//carboxy-lyase [Phaseolus vulgaris]
Aradu.3G22S	1084	348.53	2330.45	-1.98805	2.36266e-193	Down	NA	NA	NA	NA	gi|312599835|gb|ADQ91843.1|//late embryogenesis abundant protein group 5 protein [Arachis hypogaea]
Aradu.3I1PV	1546	49.51	373.21	-2.16099	9.04806e-36	Down	NA	NA	NA	K19513//protein CLEC16A	gi|590632777|ref|XP_007027936.1|//Uncharacterized protein isoform 1 [Theobroma cacao];gi|922401443|ref|XP_013467858.1|//hypothetical protein MTR_1g057130 [Medicago truncatula];gi|955308007|ref|XP_014623916.1|//PREDICTED: uncharacterized protein LOC100815334 isoform X1 [Glycine max]
Aradu.3L6XU	1122	132.08	82.67	1.42918	3.89014e-13	Up	NA	NA	NA	NA	gi|950955377|ref|XP_014496626.1|//PREDICTED: uncharacterized protein LOC106758192 [Vigna radiata var. radiata]
Aradu.3P8RF	1781	209	111	1.66615	2.21811e-24	Up	GO:0044425//membrane part	GO:0016853//isomerase activity	GO:0006457//protein folding	K09571//FK506-binding protein 4/5 [EC:5.2.1.8]	gi|502140947|ref|XP_004504386.1|//PREDICTED: 70 kDa peptidyl-prolyl isomerase-like [Cicer arietinum];gi|695076726|ref|XP_009385667.1|//PREDICTED: 70 kDa peptidyl-prolyl isomerase-like [Musa acuminata subsp. malaccensis]
Aradu.3QQ99	3732	130.41	688.45	-1.64709	2.43317e-45	Down	NA	NA	NA	K20473//neuroblastoma-amplified sequence;K13162//poly(rC)-binding protein 2/3/4;K20478//golgin subfamily B member 1	gi|593795620|ref|XP_007160848.1|//hypothetical protein PHAVU_001G021900g [Phaseolus vulgaris]
Aradu.3SD99	1148	2338.33	1903.45	1.05007	8.66298e-127	Up	GO:0016020//membrane	NA	NA	K15109//solute carrier family 25 (mitochondrial carnitine/acylcarnitine transporter), member 20/29	gi|356527277|ref|XP_003532238.1|//PREDICTED: uncharacterized protein LOC100801428 [Glycine max]
Aradu.3T2TK	1613	289.6	1230.48	-1.33388	9.55402e-59	Down	GO:0005622//intracellular;GO:0005886//plasma membrane	GO:0005525//GTP binding	GO:0007264//small GTPase mediated signal transduction;GO:0015031//protein transport	K07897//Ras-related protein Rab-7A	gi|351726788|ref|NP_001238418.1|//uncharacterized protein LOC100305642 [Glycine max]
Aradu.3T7J3	1910	99.82	795.24	-2.24078	1.02587e-77	Down	NA	NA	NA	K19513//protein CLEC16A	gi|731401052|ref|XP_010654148.1|//PREDICTED: uncharacterized protein LOC100854209 [Vitis vinifera];gi|922401443|ref|XP_013467858.1|//hypothetical protein MTR_1g057130 [Medicago truncatula];gi|947123999|gb|KRH72205.1|//hypothetical protein GLYMA_02G198100 [Glycine max];gi|593690402|ref|XP_007145802.1|//hypothetical protein PHAVU_007G269200g [Phaseolus vulgaris];gi|947124002|gb|KRH72208.1|//hypothe…
Aradu.3V1LI	871	115.34	518.18	-1.41435	6.18733e-28	Down	GO:0009535//chloroplast thylakoid membrane;GO:0005886//plasma membrane	GO:0016655//oxidoreductase activity, acting on NAD(P)H, quinone or similar compound as acceptor	GO:0010258//NADH dehydrogenase complex (plastoquinone) assembly;GO:0055114//oxidation-reduction process	K17065//dynamin 1-like protein [EC:3.6.5.5]	gi|351727511|ref|NP_001237675.1|//uncharacterized protein LOC100500669 [Glycine max]
Aradu.3XI0L	1375	421.05	346.4	1.03476	1.24468e-23	Up	NA	NA	NA	K14505//cyclin D3, plant	gi|920682137|gb|KOM28909.1|//hypothetical protein LR48_Vigan609s004100 [Vigna angularis]
Aradu.3XQ1H	1349	362.97	1345.12	-1.13661	3.60754e-50	Down	GO:0005737//cytoplasm	GO:0051082//unfolded protein binding	GO:0006457//protein folding	K09510//DnaJ homolog subfamily B member 4	gi|595863049|ref|XP_007211510.1|//hypothetical protein PRUPE_ppa007978mg [Prunus persica];gi|297740428|emb|CBI30610.3|//unnamed protein product [Vitis vinifera]
Aradu.3YX15	4514	1815	1186.54	1.36642	4.58669e-149	Up	GO:0016020//membrane	GO:0000166//nucleotide binding;GO:0004672//protein kinase activity	GO:0016310//phosphorylation	K04733//interleukin-1 receptor-associated kinase 4 [EC:2.7.11.1]	gi|922366677|ref|XP_013455505.1|//receptor-like kinase, putative [Medicago truncatula];gi|502106486|ref|XP_004492958.1|//PREDICTED: probable receptor protein kinase TMK1 [Cicer arietinum]
Aradu.3Z0BP	442	1	17	-3.33426	0.000403005	Down	NA	NA	NA	NA	NA
Aradu.3ZR52	1318	205.22	1951.89	-2.49642	5.96316e-214	Down	GO:0005634//nucleus	GO:0000989//transcription factor activity, transcription factor binding;GO:0008270//zinc ion binding	GO:0006355//regulation of transcription, DNA-templated;GO:0009640//photomorphogenesis	K02365//separase [EC:3.4.22.49];K12135//zinc finger protein CONSTANS	gi|356496675|ref|XP_003517191.1|//PREDICTED: B-box zinc finger protein 18-like [Glycine max];gi|734411666|gb|KHN36052.1|//Putative salt tolerance-like protein [Glycine soja];gi|947128835|gb|KRH76689.1|//hypothetical protein GLYMA_01G168500 [Glycine max]
Aradu.409XI	1231	78.21	352.49	-1.41895	1.27062e-19	Down	GO:0005783//endoplasmic reticulum	GO:0046872//metal ion binding;GO:0005524//ATP binding;GO:0016887//ATPase activity	GO:0006810//transport;GO:0045048//protein insertion into ER membrane	K01551//arsenite-transporting ATPase [EC:3.6.3.16]	gi|502157463|ref|XP_004510885.1|//PREDICTED: ATPase ASNA1 homolog [Cicer arietinum]
Aradu.40CKU	1673	0	305.99	-8.50413	9.88015e-50	Down	GO:0005783//endoplasmic reticulum;GO:0044425//membrane part	GO:0016709//oxidoreductase activity, acting on paired donors, with incorporation or reduction of molecular oxygen, NAD(P)H as one donor, and incorporation of one atom of oxygen;GO:0046872//metal ion binding	GO:0098542//defense response to other organism;GO:0044550//secondary metabolite biosynthetic process;GO:0042343//indole glucosinolate metabolic process	K13260//isoflavone 2'-hydroxylase [EC:1.14.13.89]	gi|356528158|ref|XP_003532672.1|//PREDICTED: isoflavone 2'-hydroxylase-like [Glycine max]
Aradu.40ZY5	855	142	1	7.90295	1.18071e-41	Up	NA	NA	NA	K20476//RAB6A-GEF complex partner protein 1	gi|342365812|gb|AEL30346.1|//WD40-like protein [Arachis hypogaea]
Aradu.4118A	3216	5364.59	2931.61	1.62498	0	Up	NA	GO:0030246//carbohydrate binding;GO:0032450//maltose alpha-glucosidase activity;GO:0004558//alpha-1,4-glucosidase activity	GO:0000023//maltose metabolic process	K15925//alpha-D-xyloside xylohydrolase [EC:3.2.1.177]	gi|356495935|ref|XP_003516826.1|//PREDICTED: alpha-xylosidase 1-like [Glycine max]
Aradu.41J00	1185	986.34	447.99	1.89183	1.2439e-129	Up	NA	GO:0080030//methyl indole-3-acetate esterase activity	GO:0033473//indoleacetic acid conjugate metabolic process;GO:0048367//shoot system development	K13544//pheophorbidase [EC:3.1.1.82]	gi|356516217|ref|XP_003526792.1|//PREDICTED: methylesterase 17 [Glycine max]
Aradu.42J3J	2634	11384.1	69341.6	-1.8535	0	Down	GO:0009705//plant-type vacuole membrane;GO:0016021//integral component of membrane	GO:0015140//malate transmembrane transporter activity	GO:0071423//malate transmembrane transport;GO:0015743//malate transport	K12741//heterogeneous nuclear ribonucleoprotein A1/A3;K00430//peroxidase [EC:1.11.1.7];K03695//ATP-dependent Clp protease ATP-binding subunit ClpB;K04730//interleukin-1 receptor-associated kinase 1 [EC:2.7.11.1];K13098//RNA-binding protein FUS	gi|950935394|ref|XP_014516643.1|//PREDICTED: aluminum-activated malate transporter 9-like [Vigna radiata var. radiata];gi|502163753|ref|XP_004512938.1|//PREDICTED: aluminum-activated malate transporter 9-like [Cicer arietinum]
Aradu.42P16	447	29	103	-1.07531	4.61659e-05	Down	NA	GO:0003677//DNA binding	NA	K14841//ribosome biogenesis protein NSA1	gi|734378297|gb|KHN21982.1|//Zinc finger protein ZAT8 [Glycine soja]
Aradu.43BHZ	796	35.79	152.72	-1.34005	8.31862e-09	Down	NA	NA	NA	NA	gi|358248776|ref|NP_001239938.1|//uncharacterized protein LOC100788024 [Glycine max]
Aradu.43J56	1749	51.2	285.26	-1.72486	5.58984e-21	Down	NA	NA	NA	K12135//zinc finger protein CONSTANS	gi|61611678|gb|AAX47172.1|//CONSTANS-LIKE a [Pisum sativum];gi|351725879|ref|NP_001235828.1|//CONSTANS-like 2a [Glycine max]
Aradu.43KV4	1093	1	244	-7.17753	6.67793e-45	Down	NA	NA	NA	NA	NA
Aradu.440M4	671	1501.56	5359.05	-1.08231	1.79218e-180	Down	NA	NA	GO:0006952//defense response;GO:0051704//multi-organism process	NA	gi|56267931|gb|AAV85438.1|//putative defensin 2.1 precursor [Medicago sativa]
Aradu.44JZ9	303	17.5	7	2.07513	0.00032059	Up	NA	NA	NA	NA	gi|947061538|gb|KRH10799.1|//hypothetical protein GLYMA_15G069900 [Glycine max]
Aradu.45DKN	614	4	93	-3.78595	1.62095e-16	Down	NA	NA	NA	K12854//pre-mRNA-splicing helicase BRR2 [EC:3.6.4.13];K12818//ATP-dependent RNA helicase DHX8/PRP22 [EC:3.6.4.13]	NA
Aradu.45G9P	1269	575.1	390.89	1.31026	2.12474e-45	Up	GO:0005634//nucleus;GO:0009986//cell surface;GO:0005886//plasma membrane;GO:0005737//cytoplasm	GO:0005524//ATP binding;GO:0004674//protein serine/threonine kinase activity	GO:0009926//auxin polar transport;GO:0048825//cotyledon development;GO:0009958//positive gravitropism;GO:0009734//auxin-activated signaling pathway;GO:0006468//protein phosphorylation;GO:0048766//root hair initiation;GO:0035556//intracellular signal transduction;GO:0048767//root hair elongation	K08286//protein-serine/threonine kinase [EC:2.7.11.-]	gi|356528424|ref|XP_003532803.1|//PREDICTED: protein kinase PINOID-like [Glycine max]
Aradu.46DHP	2384	787.24	5026.17	-1.92138	0	Down	GO:0016021//integral component of membrane;GO:0005886//plasma membrane	GO:0046027//phospholipid:diacylglycerol acyltransferase activity;GO:0008374//O-acyltransferase activity	GO:0006629//lipid metabolic process	K00679//phospholipid:diacylglycerol acyltransferase [EC:2.3.1.158];K02952//small subunit ribosomal protein S13	gi|734404437|gb|KHN32948.1|//CASP-like protein [Glycine soja];gi|920704477|gb|KOM47702.1|//hypothetical protein LR48_Vigan07g140600 [Vigna angularis];gi|734334934|gb|KHN07921.1|//Phospholipid:diacylglycerol acyltransferase 1 [Glycine soja]
Aradu.46Z90	5010	425.38	2164.15	-1.59377	9.29515e-133	Down	GO:0016021//integral component of membrane	GO:0005524//ATP binding;GO:0042626//ATPase activity, coupled to transmembrane movement of substances	GO:0055085//transmembrane transport	K05666//ATP-binding cassette, subfamily C (CFTR/MRP), member 2	gi|356526035|ref|XP_003531625.1|//PREDICTED: ABC transporter C family member 8-like [Glycine max]
Aradu.485JI	2165	1371.72	793.49	1.54291	2.93451e-135	Up	NA	NA	NA	K11426//SET and MYND domain-containing protein	gi|950982378|ref|XP_014502529.1|//PREDICTED: uncharacterized protein LOC106762917 [Vigna radiata var. radiata]
Aradu.486U1	685	3	32.55	-2.68642	1.68339e-05	Down	GO:0043231//intracellular membrane-bounded organelle;GO:0005887//integral component of plasma membrane;GO:0016021//integral component of membrane	GO:0046872//metal ion binding;GO:0005524//ATP binding;GO:0005388//calcium-transporting ATPase activity;GO:0005516//calmodulin binding;GO:0005488//binding	GO:0070588//calcium ion transmembrane transport;GO:0006811//ion transport	K01537//Ca2+-transporting ATPase [EC:3.6.3.8]	gi|955371530|ref|XP_014623401.1|//PREDICTED: calcium-transporting ATPase 8, plasma membrane-type-like [Glycine max];gi|950975004|ref|XP_014501025.1|//PREDICTED: calcium-transporting ATPase 8, plasma membrane-type-like [Vigna radiata var. radiata];gi|828290981|ref|XP_012574040.1|//PREDICTED: calcium-transporting ATPase 8, plasma membrane-type isoform X2 [Cicer arietinum]
Aradu.48GI0	468	47	39	1.02239	0.000461363	Up	GO:0016021//integral component of membrane	NA	NA	NA	gi|502078066|ref|XP_004485830.1|//PREDICTED: uncharacterized protein LOC101508580 [Cicer arietinum]
Aradu.49EX5	566	40.45	9.59	2.82974	3.81812e-10	Up	GO:0009535//chloroplast thylakoid membrane;GO:0009523//photosystem II;GO:0016021//integral component of membrane	GO:0046872//metal ion binding;GO:0045156//electron transporter, transferring electrons within the cyclic electron transport pathway of photosynthesis activity;GO:0016168//chlorophyll binding	GO:0009772//photosynthetic electron transport in photosystem II;GO:0018298//protein-chromophore linkage	K02705//photosystem II CP43 chlorophyll apoprotein	gi|991820866|gb|AMF84004.1|//photosystem II CP43 chlorophyll apoprotein (chloroplast) [Gynostemma pentaphyllum]
Aradu.49NPU	663	0	63	-6.22407	2.38095e-13	Down	NA	NA	NA	NA	NA
Aradu.4A8AD	959	55	1	6.53457	1.12327e-18	Up	GO:0016021//integral component of membrane;GO:0005739//mitochondrion	GO:0016820//hydrolase activity, acting on acid anhydrides, catalyzing transmembrane movement of substances;GO:0004129//cytochrome-c oxidase activity	GO:1902600//hydrogen ion transmembrane transport;GO:0055085//transmembrane transport;GO:0055114//oxidation-reduction process	K02109//F-type H+-transporting ATPase subunit b	gi|984914630|gb|AMC32743.1|//ATPase subunit 8 (mitochondrion) [Amorpha canescens]
Aradu.4B33S	2220	90.27	3228.58	-4.4073	0	Down	NA	NA	NA	K11137//telomere length regulation protein	gi|414589613|tpg|DAA40184.1|//TPA: hypothetical protein ZEAMMB73_345624 [Zea mays]
Aradu.4B6F6	1205	1284.75	548.34	1.98155	5.26054e-179	Up	NA	NA	NA	K08819//cyclin-dependent kinase 12/13 [EC:2.7.11.22 2.7.11.23]	gi|590718320|ref|XP_007050789.1|//Uncharacterized protein TCM_004539 [Theobroma cacao]
Aradu.4C32F	3564	397.31	290.68	1.20404	3.94598e-28	Up	GO:0005737//cytoplasm	GO:0016597//amino acid binding;GO:0030170//pyridoxal phosphate binding;GO:0008184//glycogen phosphorylase activity	GO:0005980//glycogen catabolic process	K00688//glycogen phosphorylase [EC:2.4.1.1]	gi|593695247|ref|XP_007148122.1|//hypothetical protein PHAVU_006G182300g [Phaseolus vulgaris];gi|571500021|ref|XP_006594571.1|//PREDICTED: glycogen phosphorylase 1-like isoform X1 [Glycine max]
Aradu.4CF0T	1688	1240.01	1037.78	1.01006	7.22005e-64	Up	GO:0005634//nucleus;GO:0005886//plasma membrane;GO:0005737//cytoplasm	GO:0005524//ATP binding;GO:0004683//calmodulin-dependent protein kinase activity;GO:0005509//calcium ion binding;GO:0009931//calcium-dependent protein serine/threonine kinase activity;GO:0005516//calmodulin binding	GO:0009738//abscisic acid-activated signaling pathway;GO:0018105//peptidyl-serine phosphorylation;GO:0035556//intracellular signal transduction;GO:0046777//protein autophosphorylation	K13412//calcium-dependent protein kinase [EC:2.7.11.1]	gi|356508898|ref|XP_003523190.1|//PREDICTED: calcium-dependent protein kinase SK5-like [Glycine max]
Aradu.4D0DY	1561	151	2	6.99161	2.61987e-47	Up	GO:0048046//apoplast;GO:0005829//cytosol;GO:0016021//integral component of membrane;GO:0009507//chloroplast	GO:0032440//2-alkenal reductase [NAD(P)] activity;GO:0003876//AMP deaminase activity;GO:0008964//phosphoenolpyruvate carboxylase activity	GO:0006099//tricarboxylic acid cycle;GO:0032264//IMP salvage;GO:0015977//carbon fixation;GO:0048366//leaf development	K01490//AMP deaminase [EC:3.5.4.6];K01595//phosphoenolpyruvate carboxylase [EC:4.1.1.31]	gi|166714353|gb|ABY87944.1|//phosphoenolpyruvate carboxylase [Arachis hypogaea];gi|1000964361|ref|XP_015575300.1|//PREDICTED: probable AMP deaminase [Ricinus communis]
Aradu.4FA9C	2450	71.53	450.64	-1.90215	1.44547e-36	Down	GO:0016021//integral component of membrane;GO:0005886//plasma membrane	GO:0015171//amino acid transmembrane transporter activity	GO:0003333//amino acid transmembrane transport	K14209//solute carrier family 36 (proton-coupled amino acid transporter);K07889//Ras-related protein Rab-5C;K15015//solute carrier family 32 (vesicular inhibitory amino acid transporter)	gi|950953376|ref|XP_014496160.1|//PREDICTED: proline transporter 2-like [Vigna radiata var. radiata]
Aradu.4GM4X	667	376	1494	-1.23717	2.54258e-63	Down	NA	NA	NA	NA	gi|593263484|ref|XP_007133920.1|//hypothetical protein PHAVU_010G003400g [Phaseolus vulgaris]
Aradu.4H615	1446	791.97	262.04	2.34887	7.33548e-137	Up	NA	GO:0016491//oxidoreductase activity	GO:0055114//oxidation-reduction process	K00010//myo-inositol 2-dehydrogenase / D-chiro-inositol 1-dehydrogenase [EC:1.1.1.18 1.1.1.369]	gi|356529384|ref|XP_003533274.1|//PREDICTED: uncharacterized oxidoreductase At4g09670-like [Glycine max]
Aradu.4JV4U	1984	19.7	239.41	-2.85001	1.2455e-31	Down	NA	NA	NA	K19513//protein CLEC16A	gi|922401443|ref|XP_013467858.1|//hypothetical protein MTR_1g057130 [Medicago truncatula];gi|955308007|ref|XP_014623916.1|//PREDICTED: uncharacterized protein LOC100815334 isoform X1 [Glycine max]
Aradu.4KT3S	3255	1598.26	1161.9	1.21322	1.55456e-109	Up	GO:0070652//HAUS complex;GO:0005876//spindle microtubule	GO:0051011//microtubule minus-end binding	GO:0051225//spindle assembly	NA	gi|502102016|ref|XP_004491941.1|//PREDICTED: uncharacterized protein LOC101500715 [Cicer arietinum];gi|950963009|ref|XP_014498237.1|//PREDICTED: AUGMIN subunit 5 [Vigna radiata var. radiata]
Aradu.4M1IL	1366	114.93	400	-1.04604	2.85042e-14	Down	GO:0043231//intracellular membrane-bounded organelle	GO:0080043//quercetin 3-O-glucosyltransferase activity;GO:0005524//ATP binding;GO:0080044//quercetin 7-O-glucosyltransferase activity;GO:0016740//transferase activity;GO:0035251//UDP-glucosyltransferase activity;GO:0016887//ATPase activity	GO:0009813//flavonoid biosynthetic process;GO:0009812//flavonoid metabolic process;GO:0052696//flavonoid glucuronidation	K06174//ATP-binding cassette, sub-family E, member 1;K00574//cyclopropane-fatty-acyl-phospholipid synthase [EC:2.1.1.79];K18822//soyasapogenol B glucuronide galactosyltransferase [EC:2.4.1.272]	gi|502161914|ref|XP_004512327.1|//PREDICTED: ABC transporter E family member 2 [Cicer arietinum];gi|734411864|gb|KHN36250.1|//UDP-glucose flavonoid 3-O-glucosyltransferase 7 [Glycine soja];gi|319759268|gb|ADV71370.1|//glycosyltransferase GT14K13 [Pueraria montana var. lobata]
Aradu.4M7WG	881	228.65	178.08	1.11382	4.08883e-15	Up	NA	NA	NA	NA	gi|951013322|ref|XP_014510282.1|//PREDICTED: protein starmaker-like [Vigna radiata var. radiata]
Aradu.4M90H	954	112.8	467.05	-1.2966	2.15769e-22	Down	GO:0016021//integral component of membrane;GO:0005886//plasma membrane	NA	NA	NA	gi|920682245|gb|KOM29017.1|//hypothetical protein LR48_Vigan627s006600 [Vigna angularis]
Aradu.4MG01	2081	57.02	195.63	-1.02538	1.2228e-07	Down	GO:0043229//intracellular organelle;GO:0005634//nucleus	GO:0003677//DNA binding	GO:0006355//regulation of transcription, DNA-templated;GO:0006996//organelle organization	K10754//replication factor C subunit 1	gi|947127203|gb|KRH75057.1|//hypothetical protein GLYMA_01G059300 [Glycine max];gi|571495234|ref|XP_006593114.1|//PREDICTED: transcription factor DIVARICATA-like [Glycine max]
Aradu.4N10P	1878	349.17	1459.03	-1.3098	1.76457e-67	Down	GO:0016021//integral component of membrane	GO:0015226//carnitine transmembrane transporter activity	GO:0055085//transmembrane transport;GO:0071702//organic substance transport;GO:0044765//single-organism transport	K08202//MFS transporter, OCT family, solute carrier family 22 (organic cation transporter), member 4/5	gi|571530296|ref|XP_006599714.1|//PREDICTED: organic cation/carnitine transporter 1-like isoform X1 [Glycine max]
Aradu.4N3HV	2544	132.45	529.28	-1.24538	1.00392e-23	Down	NA	GO:0043531//ADP binding	GO:0006952//defense response	K13459//disease resistance protein RPS2;K13457//disease resistance protein RPM1;K13415//protein brassinosteroid insensitive 1 [EC:2.7.10.1 2.7.11.1];K15078//structure-specific endonuclease subunit SLX1 [EC:3.6.1.-]	gi|571537529|ref|XP_006601011.1|//PREDICTED: probable disease resistance protein At5g66900 [Glycine max];gi|734351872|gb|KHN12956.1|//Putative disease resistance protein [Glycine soja]
Aradu.4N88U	408	14.76	257.86	-3.37362	2.16457e-39	Down	GO:0022625//cytosolic large ribosomal subunit	GO:0003735//structural constituent of ribosome	GO:0006412//translation	K02901//large subunit ribosomal protein L27e	gi|502081179|ref|XP_004486790.1|//PREDICTED: 60S ribosomal protein L27-like [Cicer arietinum]
Aradu.4ND69	534	25	170	-2.01233	7.56497e-16	Down	GO:0005634//nucleus;GO:0005737//cytoplasm	GO:0010427//abscisic acid binding;GO:0004864//protein phosphatase inhibitor activity;GO:0004872//receptor activity	GO:0080163//regulation of protein serine/threonine phosphatase activity;GO:0009738//abscisic acid-activated signaling pathway	NA	gi|502122436|ref|XP_004497745.1|//PREDICTED: lachrymatory-factor synthase-like [Cicer arietinum]
Aradu.4RE2S	1739	716.79	568.14	1.08851	2.72766e-42	Up	GO:0005622//intracellular	GO:0016629//12-oxophytodienoate reductase activity;GO:0010181//FMN binding;GO:0003959//NADPH dehydrogenase activity	GO:0055114//oxidation-reduction process	K05894//12-oxophytodienoic acid reductase [EC:1.3.1.42]	gi|571436776|ref|XP_003517567.2|//PREDICTED: 12-oxophytodienoate reductase 2 [Glycine max]
Aradu.4S7KL	1994	1565.59	651.06	2.01905	3.49694e-223	Up	GO:0016021//integral component of membrane	GO:0016705//oxidoreductase activity, acting on paired donors, with incorporation or reduction of molecular oxygen;GO:0020037//heme binding;GO:0005506//iron ion binding;GO:0004497//monooxygenase activity	GO:0055114//oxidation-reduction process	K20661//cytochrome P450 family 714 subfamily A polypeptide 1	gi|734316196|gb|KHN02133.1|//Cytochrome P450 734A1 [Glycine soja];gi|955317555|ref|XP_014630399.1|//PREDICTED: LOW QUALITY PROTEIN: cytochrome P450 714A1-like [Glycine max]
Aradu.4VH05	1353	715.99	575	1.06958	4.17521e-41	Up	NA	GO:0016874//ligase activity	NA	K10268//F-box and leucine-rich repeat protein 2/20	gi|734307856|gb|KHM99188.1|//F-box/LRR-repeat protein 4 [Glycine soja]
Aradu.4W33C	408	34	13	2.14023	7.60234e-07	Up	NA	NA	NA	NA	gi|356548963|ref|XP_003542868.1|//PREDICTED: uncharacterized protein LOC100799416 [Glycine max]
Aradu.4XP3R	1495	1422.22	796	1.59051	1.8423e-146	Up	NA	NA	NA	K09523//DnaJ homolog subfamily C member 3;K09512//DnaJ homolog subfamily B member 6;K09514//DnaJ homolog subfamily B member 8	gi|828328782|ref|XP_012574113.1|//PREDICTED: dnaJ homolog subfamily B member 6-like isoform X2 [Cicer arietinum];gi|828328784|ref|XP_012574114.1|//PREDICTED: dnaJ homolog subfamily B member 6-like isoform X3 [Cicer arietinum]
Aradu.4YG62	1440	556.99	145.9	2.68588	2.91276e-112	Up	NA	GO:0008353//RNA polymerase II carboxy-terminal domain kinase activity;GO:0005524//ATP binding	GO:0006468//protein phosphorylation	K07760//cyclin-dependent kinase [EC:2.7.11.22]	gi|965667418|dbj|BAT82906.1|//hypothetical protein VIGAN_03297800 [Vigna angularis var. angularis]
Aradu.4Z7GD	1352	69.57	45.48	1.36644	2.57979e-07	Up	NA	NA	NA	K03006//DNA-directed RNA polymerase II subunit RPB1 [EC:2.7.7.6];K00430//peroxidase [EC:1.11.1.7];K11649//SWI/SNF related-matrix-associated actin-dependent regulator of chromatin subfamily C	gi|922424993|ref|XP_013618577.1|//PREDICTED: periaxin [Brassica oleracea var. oleracea];gi|923775527|ref|XP_013680733.1|//PREDICTED: periaxin-like [Brassica napus]
Aradu.50TKD	1585	4129	3075.25	1.1783	5.208e-268	Up	NA	GO:0016740//transferase activity;GO:0004190//aspartic-type endopeptidase activity	GO:0006508//proteolysis;GO:0030163//protein catabolic process	K00924;K02882//large subunit ribosomal protein L18Ae	gi|593696890|ref|XP_007148927.1|//hypothetical protein PHAVU_005G025900g [Phaseolus vulgaris]
Aradu.51BBB	854	128.22	475.82	-1.13859	7.25829e-19	Down	GO:0016020//membrane;GO:0016021//integral component of membrane	NA	NA	NA	gi|703090853|ref|XP_010094196.1|//hypothetical protein L484_016739 [Morus notabilis];gi|951002036|ref|XP_014507233.1|//PREDICTED: uncharacterized protein LOC106766950 [Vigna radiata var. radiata]
Aradu.51INX	1020	1163.3	0	11.9372	1.34414e-186	Up	NA	NA	NA	K08592//sentrin-specific protease 1 [EC:3.4.22.68]	gi|922377573|ref|XP_013459070.1|//Ulp1 protease family, carboxy-terminal domain protein [Medicago truncatula];gi|357484057|ref|XP_003612315.1|//Ulp1 protease family, carboxy-terminal domain protein [Medicago truncatula]
Aradu.51TEZ	1479	15.9	131.2	-2.29146	1.49789e-14	Down	NA	GO:0016787//hydrolase activity	NA	NA	gi|828314610|ref|XP_012571793.1|//PREDICTED: nudix hydrolase 2 isoform X1 [Cicer arietinum]
Aradu.51WYZ	1454	706.33	312.24	1.93089	8.21462e-96	Up	GO:0005737//cytoplasm	GO:0005524//ATP binding;GO:0004356//glutamate-ammonia ligase activity	GO:0009399//nitrogen fixation;GO:0006542//glutamine biosynthetic process	K01915//glutamine synthetase [EC:6.3.1.2]	gi|734332967|gb|KHN07539.1|//Glutamine synthetase nodule isozyme [Glycine soja];gi|950952071|ref|XP_014495843.1|//PREDICTED: glutamine synthetase nodule isozyme isoform X1 [Vigna radiata var. radiata]
Aradu.521ML	1152	124.95	84.37	1.31976	2.80738e-11	Up	NA	NA	GO:0009567//double fertilization forming a zygote and endosperm	K06636//structural maintenance of chromosome 1	gi|920686892|gb|KOM30875.1|//hypothetical protein LR48_Vigan01g043000 [Vigna angularis]
Aradu.5296S	1107	52.03	0	7.45448	6.84998e-17	Up	NA	NA	NA	NA	gi|593333826|ref|XP_007139986.1|//hypothetical protein PHAVU_008G0752000g, partial [Phaseolus vulgaris]
Aradu.52P3J	1078	23	127	-1.71192	3.51101e-10	Down	NA	NA	NA	K19613//leucine-rich repeat protein SHOC2	gi|955313715|ref|XP_014629579.1|//PREDICTED: putative disease resistance protein At3g14460 [Glycine max]
Aradu.54E80	2086	352.87	262.91	1.17777	2.306e-24	Up	NA	GO:0003824//catalytic activity	NA	K13680//beta-mannan synthase [EC:2.4.1.32];K20247//hercynylcysteine sulfoxide lyase [EC:4.4.1.-]	gi|356505739|ref|XP_003521647.1|//PREDICTED: probable L-cysteine desulfhydrase, chloroplastic [Glycine max]
Aradu.54HQG	1476	0	294	-8.44647	3.84005e-48	Down	NA	NA	NA	K00963//UTP--glucose-1-phosphate uridylyltransferase [EC:2.7.7.9]	gi|356539785|ref|XP_003538374.1|//PREDICTED: UTP--glucose-1-phosphate uridylyltransferase [Glycine max]
Aradu.54RPC	279	349	274	1.10226	7.5756e-22	Up	NA	NA	NA	NA	NA
Aradu.55IUK	1556	16	565.95	-4.39132	2.45143e-100	Down	NA	NA	NA	K01872//alanyl-tRNA synthetase [EC:6.1.1.7];K07300//Ca2+:H+ antiporter	gi|565401190|ref|XP_006366093.1|//PREDICTED: uncharacterized protein LOC102600573 [Solanum tuberosum]
Aradu.570RS	1610	3133.4	10905.5	-1.04604	0	Down	GO:0016021//integral component of membrane;GO:0005886//plasma membrane	GO:0015171//amino acid transmembrane transporter activity	GO:0080144//amino acid homeostasis;GO:0032973//amino acid export;GO:0003333//amino acid transmembrane transport;GO:0043090//amino acid import	K07874//Ras-related protein Rab-1A;K00801//farnesyl-diphosphate farnesyltransferase [EC:2.5.1.21]	gi|593488387|ref|XP_007141061.1|//hypothetical protein PHAVU_008G164000g [Phaseolus vulgaris]
Aradu.57C0B	1509	377.5	169.92	1.90483	4.81503e-51	Up	NA	GO:0004721//phosphoprotein phosphatase activity;GO:0004722//protein serine/threonine phosphatase activity	GO:0006470//protein dephosphorylation	K10147//protein phosphatase 1D [EC:3.1.3.16];K14291//phosphorylated adapter RNA export protein;K19704//protein phosphatase PTC1 [EC:3.1.3.16];K17506//protein phosphatase 1L [EC:3.1.3.16];K19477//cGMP-dependent protein kinase 2 [EC:2.7.11.12]	gi|593269268|ref|XP_007136811.1|//hypothetical protein PHAVU_009G076300g [Phaseolus vulgaris]
Aradu.57J9Q	1950	0	252	-8.22407	1.86131e-42	Down	GO:0016020//membrane;GO:0016021//integral component of membrane	NA	NA	K17081//prohibitin 2;K15377//solute carrier family 44 (choline transporter-like protein), member 2/4/5	gi|828310888|ref|XP_004499932.2|//PREDICTED: protein PNS1 isoform X1 [Cicer arietinum];gi|828310891|ref|XP_004499933.2|//PREDICTED: protein PNS1 isoform X2 [Cicer arietinum];gi|823151181|ref|XP_012475418.1|//PREDICTED: CTL-like protein DDB_G0274487 [Gossypium raimondii]
Aradu.586VX	2299	172.14	617.53	-1.08972	1.84054e-22	Down	NA	NA	NA	NA	gi|502116188|ref|XP_004495334.1|//PREDICTED: protein SIEVE ELEMENT OCCLUSION B-like [Cicer arietinum]
Aradu.59CIU	1437	822.84	541.68	1.35638	1.10866e-67	Up	GO:0016021//integral component of membrane;GO:0005789//endoplasmic reticulum membrane	GO:0016787//hydrolase activity	GO:0006810//transport	K20352//p24 family protein delta-1	gi|502140346|ref|XP_004504178.1|//PREDICTED: transmembrane emp24 domain-containing protein p24delta3-like [Cicer arietinum]
Aradu.5A1GI	1177	30	110	-1.12126	1.50468e-05	Down	GO:0016021//integral component of membrane	NA	NA	K10756//replication factor C subunit 3/5	gi|734354203|gb|KHN13641.1|//Quinohemoprotein ethanol dehydrogenase type-1 [Glycine soja];gi|734354200|gb|KHN13638.1|//Quinohemoprotein ethanol dehydrogenase type-1 [Glycine soja]
Aradu.5D1IW	1305	1085.53	4102.91	-1.16504	8.92563e-156	Down	GO:0005929//cilium;GO:0005829//cytosol;GO:0016021//integral component of membrane;GO:0030991//intraciliary transport particle A;GO:0009570//chloroplast stroma	GO:0016874//ligase activity	GO:0060271//cilium assembly;GO:0061512//protein localization to cilium;GO:0035721//intraciliary retrograde transport	NA	gi|950961158|ref|XP_014497823.1|//PREDICTED: uncharacterized protein LOC106759255 [Vigna radiata var. radiata]
Aradu.5F6JJ	862	1895	1065	1.58455	1.2884e-193	Up	NA	NA	NA	NA	gi|502139093|ref|XP_004503642.1|//PREDICTED: arabinogalactan peptide 16-like [Cicer arietinum]
Aradu.5FG59	1948	116.11	561.35	-1.5202	2.31858e-33	Down	NA	GO:1901363//heterocyclic compound binding;GO:0097159//organic cyclic compound binding	NA	K11294//nucleolin	gi|502176354|ref|XP_004515855.1|//PREDICTED: 28 kDa ribonucleoprotein, chloroplastic [Cicer arietinum]
Aradu.5HX5K	495	6952	5743	1.02883	0	Up	NA	NA	NA	K03686//molecular chaperone DnaJ	gi|359806673|ref|NP_001241283.1|//uncharacterized protein LOC100800959 [Glycine max]
Aradu.5I03J	1307	170	99	1.53324	4.77309e-18	Up	NA	NA	NA	K02184//formin 2	gi|697189010|ref|XP_009603549.1|//PREDICTED: probable membrane-associated kinase regulator 1 [Nicotiana tomentosiformis];gi|548844301|gb|ERN03927.1|//hypothetical protein AMTR_s00078p00197410 [Amborella trichopoda]
Aradu.5IY1Y	1944	1050.04	574.15	1.62415	8.13505e-112	Up	GO:0009505//plant-type cell wall;GO:0009506//plasmodesma;GO:0016021//integral component of membrane;GO:0046658//anchored component of plasma membrane	GO:0016722//oxidoreductase activity, oxidizing metal ions;GO:0005507//copper ion binding;GO:0008447//L-ascorbate oxidase activity	GO:0055114//oxidation-reduction process	K19791//iron transport multicopper oxidase	gi|951009915|ref|XP_014509414.1|//PREDICTED: monocopper oxidase-like protein SKU5 [Vigna radiata var. radiata]
Aradu.5IY98	2224	646.26	5128.36	-2.2351	0	Down	NA	GO:0005524//ATP binding	NA	K09753//cinnamoyl-CoA reductase [EC:1.2.1.44];K03064//26S proteasome regulatory subunit T4	gi|357469233|ref|XP_003604901.1|//ribulose bisphosphate carboxylase/oxygenase activase [Medicago truncatula]
Aradu.5K97F	1162	221.18	109.26	1.77066	7.58759e-28	Up	GO:0005634//nucleus;GO:0016021//integral component of membrane	GO:0003677//DNA binding;GO:0008270//zinc ion binding;GO:0015079//potassium ion transmembrane transporter activity	GO:0071805//potassium ion transmembrane transport;GO:0045893//positive regulation of transcription, DNA-templated	NA	gi|950972189|ref|XP_014500468.1|//PREDICTED: uncharacterized protein LOC106761429 [Vigna radiata var. radiata]
Aradu.5M687	1245	328.3	247.32	1.16184	2.51284e-22	Up	GO:0009507//chloroplast	GO:0016747//transferase activity, transferring acyl groups other than amino-acyl groups	NA	K15400//omega-hydroxypalmitate O-feruloyl transferase [EC:2.3.1.188];K13065//shikimate O-hydroxycinnamoyltransferase [EC:2.3.1.133]	gi|947123804|gb|KRH72010.1|//hypothetical protein GLYMA_02G185100 [Glycine max]
Aradu.5M8NL	2721	28.06	395.88	-3.06527	7.00698e-55	Down	NA	NA	NA	K05909//laccase [EC:1.10.3.2];K01534//Cd2+/Zn2+-exporting ATPase [EC:3.6.3.3 3.6.3.5];K03650//tRNA modification GTPase [EC:3.6.-.-]	gi|698534355|ref|XP_009763829.1|//PREDICTED: uncharacterized protein LOC104215674 [Nicotiana sylvestris];gi|971554346|ref|XP_015165150.1|//PREDICTED: uncharacterized protein LOC107061009 [Solanum tuberosum]
Aradu.5MH5E	1251	171.48	656.2	-1.18289	7.03266e-27	Down	GO:0043226//organelle;GO:0030286//dynein complex;GO:0044464//cell part	NA	GO:0007017//microtubule-based process	K10418//dynein light chain LC8-type	gi|357478003|ref|XP_003609287.1|//dynein light chain type 1 family protein [Medicago truncatula];gi|502151807|ref|XP_004508623.1|//PREDICTED: uncharacterized protein LOC101496467 [Cicer arietinum]
Aradu.5N08M	3105	286.22	10649.7	-4.46433	0	Down	GO:0005634//nucleus	GO:0003677//DNA binding	GO:0006355//regulation of transcription, DNA-templated	K12133//MYB-related transcription factor LHY	gi|356520209|ref|XP_003528756.1|//PREDICTED: protein LHY isoform X1 [Glycine max]
Aradu.5N10F	1737	729.6	536.11	1.19778	7.03758e-50	Up	GO:0005783//endoplasmic reticulum;GO:0044425//membrane part;GO:0016021//integral component of membrane	GO:0016491//oxidoreductase activity;GO:0016717//oxidoreductase activity, acting on paired donors, with oxidation of a pair of donors resulting in the reduction of molecular oxygen to two molecules of water	GO:0006633//fatty acid biosynthetic process;GO:0055114//oxidation-reduction process;GO:0006629//lipid metabolic process	K10257//acyl-lipid omega-3 desaturase [EC:1.14.19.25 1.14.19.35 1.14.19.36]	gi|351721124|ref|NP_001236943.1|//microsomal omega-3 fatty acid desaturase [Glycine max];gi|502129346|ref|XP_004500272.1|//PREDICTED: omega-3 fatty acid desaturase, endoplasmic reticulum-like [Cicer arietinum]
Aradu.5S8J3	2270	668.1	5133.34	-2.18856	0	Down	GO:0005634//nucleus	GO:0043565//sequence-specific DNA binding;GO:0003700//transcription factor activity, sequence-specific DNA binding	GO:0006355//regulation of transcription, DNA-templated	K09419//heat shock transcription factor, other eukaryote	gi|356545733|ref|XP_003541290.1|//PREDICTED: heat stress transcription factor A-2-like [Glycine max]
Aradu.5SI2X	671	132.27	2.98	6.22524	5.28841e-43	Up	NA	NA	NA	NA	NA
Aradu.5V0J3	1130	0	227	-8.07334	5.66401e-39	Down	NA	NA	NA	NA	NA
Aradu.5V1WF	1839	528.25	5.29	7.39502	3.40799e-157	Up	NA	GO:0004713//protein tyrosine kinase activity;GO:0004674//protein serine/threonine kinase activity;GO:0005524//ATP binding	GO:0018108//peptidyl-tyrosine phosphorylation	K09291//nucleoprotein TPR;K11323//histone arginine demethylase JMJD6 [EC:1.14.11.-];K13436//pto-interacting protein 1 [EC:2.7.11.1]	gi|593686984|ref|XP_007144158.1|//hypothetical protein PHAVU_007G1336002g, partial [Phaseolus vulgaris];gi|976924294|gb|KVI08284.1|//Protein kinase, ATP binding site-containing protein [Cynara cardunculus var. scolymus]
Aradu.5W566	1482	98115	77372.4	1.09586	0	Up	NA	GO:0046872//metal ion binding	NA	NA	gi|71040683|gb|AAZ20290.1|//type 2 metallothionein [Arachis hypogaea]
Aradu.5Y6Q8	1384	534.29	336.3	1.42108	1.16346e-47	Up	NA	GO:0016787//hydrolase activity	GO:0016042//lipid catabolic process	NA	gi|356500204|ref|XP_003518923.1|//PREDICTED: probable inactive patatin-like protein 9 [Glycine max]
Aradu.5YJ13	2203	311.2	240.58	1.12453	2.98815e-20	Up	NA	NA	NA	K03386//peroxiredoxin (alkyl hydroperoxide reductase subunit C) [EC:1.11.1.15];K19525//vacuolar protein sorting-associated protein 13A/C;K13217//pre-mRNA-processing factor 39	gi|922386518|ref|XP_003595842.2|//DUF946 family protein [Medicago truncatula]
Aradu.5YR7S	507	178	136	1.14148	1.45848e-12	Up	NA	NA	NA	K14488//SAUR family protein	gi|596199566|ref|XP_007223677.1|//hypothetical protein PRUPE_ppa012903mg [Prunus persica]
Aradu.5YW6Q	291	86	46	1.65591	6.17752e-11	Up	NA	NA	NA	NA	gi|301087183|gb|ADK60808.1|//hypothetical protein, partial [Arachis diogoi]
Aradu.5Z6ML	411	1544	336	2.95335	0	Up	GO:0009507//chloroplast	NA	NA	NA	gi|442803210|gb|AGC78945.1|//hypothetical protein (mitochondrion) [Vicia faba]
Aradu.60FFJ	1741	755.66	624.87	1.02739	1.22922e-40	Up	GO:0019005//SCF ubiquitin ligase complex	GO:0004842//ubiquitin-protein transferase activity	GO:0031146//SCF-dependent proteasomal ubiquitin-dependent protein catabolic process;GO:0016567//protein ubiquitination	NA	gi|734414296|gb|KHN37221.1|//F-box only protein 13 [Glycine soja]
Aradu.60LKJ	4869	318	1337	-1.31869	1.32098e-62	Down	NA	NA	NA	K13459//disease resistance protein RPS2	gi|922392024|ref|XP_013464423.1|//disease resistance protein (CC-NBS-LRR class) family protein [Medicago truncatula]
Aradu.618YE	684	74	261	-1.06525	3.82253e-10	Down	NA	NA	NA	NA	NA
Aradu.61Y68	1861	369.42	210.51	1.56458	2.42588e-38	Up	NA	GO:0004518//nuclease activity	NA	K13963//serpin B;K14487//auxin responsive GH3 gene family	gi|920695670|gb|KOM38895.1|//hypothetical protein LR48_Vigan03g227700 [Vigna angularis];gi|734372631|gb|KHN19854.1|//Putative indole-3-acetic acid-amido synthetase GH3.6 [Glycine soja]
Aradu.623R5	1155	126.4	618.68	-1.53799	3.33419e-37	Down	GO:0044424//intracellular part;GO:0005634//nucleus;GO:0005829//cytosol;GO:0008540//proteasome regulatory particle, base subcomplex	GO:0031593//polyubiquitin binding	GO:0043248//proteasome assembly;GO:0043161//proteasome-mediated ubiquitin-dependent protein catabolic process;GO:0009987//cellular process	K03029//26S proteasome regulatory subunit N10	gi|947128789|gb|KRH76643.1|//hypothetical protein GLYMA_01G165100 [Glycine max]
Aradu.6262P	423	68.02	35.69	1.68365	3.54996e-09	Up	NA	NA	NA	NA	gi|950973194|ref|XP_014500673.1|//PREDICTED: uncharacterized protein LOC106761621 [Vigna radiata var. radiata]
Aradu.62IHC	734	125.81	83.58	1.34322	1.30683e-11	Up	NA	NA	NA	NA	gi|828290755|ref|XP_012573692.1|//PREDICTED: uncharacterized protein LOC101499111 [Cicer arietinum]
Aradu.62QCX	2943	252.32	195.56	1.12085	1.17416e-16	Up	NA	GO:0000166//nucleotide binding	NA	K13459//disease resistance protein RPS2	gi|571471075|ref|XP_006585198.1|//PREDICTED: disease resistance protein At4g27190-like [Glycine max]
Aradu.62WGK	991	663.27	523.09	1.09574	1.15598e-39	Up	NA	NA	NA	NA	gi|734389098|gb|KHN26106.1|//hypothetical protein glysoja_019430 [Glycine soja]
Aradu.634DQ	2532	50.06	1778.64	-4.39777	0	Down	GO:0005741//mitochondrial outer membrane	GO:0008308//voltage-gated anion channel activity	GO:1903959//regulation of anion transmembrane transport	K15040//voltage-dependent anion channel protein 2	gi|593781045|ref|XP_007153563.1|//hypothetical protein PHAVU_003G046100g [Phaseolus vulgaris];gi|593262038|ref|XP_007133198.1|//hypothetical protein PHAVU_011G159900g [Phaseolus vulgaris];gi|565401190|ref|XP_006366093.1|//PREDICTED: uncharacterized protein LOC102600573 [Solanum tuberosum];gi|734352829|gb|KHN13242.1|//Outer plastidial membrane protein porin [Glycine soja]
Aradu.63N31	1471	3	662.33	-7.03324	2.93854e-120	Down	NA	NA	NA	K06699//proteasome activator subunit 4;K12472//epidermal growth factor receptor substrate 15	gi|595863775|ref|XP_007211648.1|//hypothetical protein PRUPE_ppa008862mg [Prunus persica]
Aradu.63RCW	1711	67.65	242.15	-1.08653	8.63039e-10	Down	GO:0009535//chloroplast thylakoid membrane;GO:0009543//chloroplast thylakoid lumen;GO:0019898//extrinsic component of membrane;GO:0009570//chloroplast stroma;GO:0009654//photosystem II oxygen evolving complex	GO:0005509//calcium ion binding	GO:0048564//photosystem I assembly;GO:0015979//photosynthesis	K12398//AP-3 complex subunit mu	gi|965671525|dbj|BAT86132.1|//hypothetical protein VIGAN_04375500 [Vigna angularis var. angularis];gi|356505763|ref|XP_003521659.1|//PREDICTED: psbP domain-containing protein 1, chloroplastic-like [Glycine max]
Aradu.640E1	1074	1267.45	6006.43	-1.49137	0	Down	GO:0005634//nucleus;GO:0005737//cytoplasm	GO:0010427//abscisic acid binding;GO:0004864//protein phosphatase inhibitor activity;GO:0004872//receptor activity	GO:0080163//regulation of protein serine/threonine phosphatase activity;GO:0009738//abscisic acid-activated signaling pathway;GO:0043086//negative regulation of catalytic activity	K14496//abscisic acid receptor PYR/PYL family	gi|196196276|gb|ACG76109.1|//pathogenesis-induced protein [Arachis hypogaea]
Aradu.65HV5	1439	1828.32	10692.6	-1.79481	0	Down	GO:0005737//cytoplasm	GO:0005506//iron ion binding;GO:0050113//inositol oxygenase activity	GO:0019310//inositol catabolic process;GO:0055114//oxidation-reduction process	K00469//inositol oxygenase [EC:1.13.99.1]	gi|922332468|ref|XP_013444225.1|//myo-inositol oxygenase [Medicago truncatula]
Aradu.665TV	2157	1142.68	715.98	1.42764	8.55165e-101	Up	NA	NA	NA	K05868//cyclin B	gi|747067537|ref|XP_011080495.1|//PREDICTED: G2/mitotic-specific cyclin S13-7-like [Sesamum indicum]
Aradu.66DGF	994	31	483.88	-3.2111	1.52309e-69	Down	NA	GO:0005488//binding	GO:0006351//transcription, DNA-templated	K09260//MADS-box transcription enhancer factor 2A	gi|920687255|gb|KOM31238.1|//hypothetical protein LR48_Vigan01g079300 [Vigna angularis]
Aradu.687AB	1121	63.46	224.57	-1.07004	5.12413e-09	Down	NA	GO:0032440//2-alkenal reductase [NAD(P)] activity;GO:0046983//protein dimerization activity	GO:0055114//oxidation-reduction process	NA	gi|388510320|gb|AFK43226.1|//unknown [Lotus japonicus]
Aradu.68SJR	737	9.65	47.95	-1.55972	0.000178892	Down	GO:0005739//mitochondrion	GO:0000166//nucleotide binding;GO:0003995//acyl-CoA dehydrogenase activity;GO:0050662//coenzyme binding	GO:0046395//carboxylic acid catabolic process;GO:0044238//primary metabolic process;GO:0055114//oxidation-reduction process	K00253//isovaleryl-CoA dehydrogenase [EC:1.3.8.4]	gi|976925448|gb|KVI09353.1|//Acyl-CoA dehydrogenase, conserved site-containing protein [Cynara cardunculus var. scolymus]
Aradu.692V1	411	116.72	55.52	1.82518	4.51151e-16	Up	GO:0005634//nucleus;GO:0005622//intracellular	GO:0005525//GTP binding;GO:0044212//transcription regulatory region DNA binding;GO:0003924//GTPase activity	GO:0045892//negative regulation of transcription, DNA-templated;GO:0010113//negative regulation of systemic acquired resistance;GO:0006412//translation;GO:0016570//histone modification	K03243//translation initiation factor 5B	gi|661884844|emb|CDP11376.1|//unnamed protein product [Coffea canephora];gi|388504682|gb|AFK40407.1|//unknown [Lotus japonicus]
Aradu.69JAE	927	115.57	96	1.02087	1.43168e-07	Up	GO:0016021//integral component of membrane	NA	NA	NA	gi|734399324|gb|KHN30830.1|//hypothetical protein glysoja_034854 [Glycine soja]
Aradu.69Z0K	2269	172.55	796.77	-1.45394	8.87181e-44	Down	GO:0005634//nucleus;GO:0016021//integral component of membrane;GO:0005737//cytoplasm	GO:0005524//ATP binding;GO:0005509//calcium ion binding;GO:0004683//calmodulin-dependent protein kinase activity;GO:0009931//calcium-dependent protein serine/threonine kinase activity;GO:0005516//calmodulin binding	GO:0018105//peptidyl-serine phosphorylation;GO:0009877//nodulation;GO:0035556//intracellular signal transduction;GO:0009608//response to symbiont;GO:0046777//protein autophosphorylation	K13412//calcium-dependent protein kinase [EC:2.7.11.1]	gi|186909461|gb|ACC94267.1|//Ca2+ and calmodulin-dependent protein kinase [Sesbania rostrata];gi|195542475|gb|ACB46142.1|//calcium calmodulin-dependent protein kinase [Arachis hypogaea]
Aradu.6A34H	555	114.42	80.36	1.263	6.8656e-10	Up	GO:0016020//membrane	NA	NA	NA	gi|502121376|ref|XP_004497293.1|//PREDICTED: CASP-like protein 4C2 [Cicer arietinum]
Aradu.6A6AL	4932	180.7	821.49	-1.43144	4.42376e-44	Down	GO:0016459//myosin complex	GO:0003779//actin binding;GO:0005524//ATP binding;GO:0003774//motor activity	NA	K10357//myosin V	gi|955372779|ref|XP_014623678.1|//PREDICTED: myosin-12 isoform X2 [Glycine max];gi|571521886|ref|XP_006598231.1|//PREDICTED: myosin-12 isoform X1 [Glycine max]
Aradu.6AI81	1657	6238.18	21931.2	-1.06058	0	Down	GO:0016021//integral component of membrane;GO:0005886//plasma membrane	GO:0005215//transporter activity	GO:0006810//transport	K09872//aquaporin PIP	gi|950961483|ref|XP_014497888.1|//PREDICTED: aquaporin PIP2-7 [Vigna radiata var. radiata];gi|162457846|ref|NP_001105639.1|//aquaporin PIP2-7 [Zea mays]
Aradu.6C67A	858	28.12	148.83	-1.65079	3.8472e-11	Down	NA	NA	NA	K06699//proteasome activator subunit 4;K12472//epidermal growth factor receptor substrate 15	gi|147771790|emb|CAN75710.1|//hypothetical protein VITISV_004492 [Vitis vinifera]
Aradu.6CP8H	949	45.61	166.67	-1.11637	1.6435e-07	Down	NA	NA	GO:0006810//transport	K20471//coatomer subunit delta	gi|734347599|gb|KHN11457.1|//Coatomer subunit delta [Glycine soja];gi|502120970|ref|XP_004497143.1|//PREDICTED: coatomer subunit delta-like [Cicer arietinum]
Aradu.6E5XK	1427	161.74	810.27	-1.57152	1.04895e-49	Down	NA	GO:0016491//oxidoreductase activity	GO:0055114//oxidation-reduction process	K00010//myo-inositol 2-dehydrogenase / D-chiro-inositol 1-dehydrogenase [EC:1.1.1.18 1.1.1.369]	gi|217073196|gb|ACJ84957.1|//unknown [Medicago truncatula]
Aradu.6E94N	715	4	46.73	-2.79307	2.10659e-07	Down	NA	NA	NA	NA	gi|645276962|ref|XP_008243539.1|//PREDICTED: bromodomain-containing factor 1-like isoform X2 [Prunus mume]
Aradu.6FR5V	1431	107.68	451.68	-1.31534	3.67981e-22	Down	GO:0005759//mitochondrial matrix	GO:0005524//ATP binding;GO:0004176//ATP-dependent peptidase activity	GO:0006508//proteolysis;GO:0030163//protein catabolic process	K03544//ATP-dependent Clp protease ATP-binding subunit ClpX	gi|297739450|emb|CBI29632.3|//unnamed protein product [Vitis vinifera];gi|694329230|ref|XP_009355384.1|//PREDICTED: ATP-dependent Clp protease ATP-binding subunit clpX-like, mitochondrial [Pyrus x bretschneideri]
Aradu.6G9SX	666	1355.52	854.29	1.41926	3.00967e-118	Up	GO:0005634//nucleus	GO:0005525//GTP binding;GO:0044212//transcription regulatory region DNA binding;GO:0003924//GTPase activity	GO:0045892//negative regulation of transcription, DNA-templated;GO:0010113//negative regulation of systemic acquired resistance;GO:0016570//histone modification	K00083//cinnamyl-alcohol dehydrogenase [EC:1.1.1.195];K03243//translation initiation factor 5B	gi|947071462|gb|KRH20353.1|//hypothetical protein GLYMA_13G172400 [Glycine max];gi|661884844|emb|CDP11376.1|//unnamed protein product [Coffea canephora];gi|734434032|gb|KHN47205.1|//hypothetical protein glysoja_022506 [Glycine soja]
Aradu.6I2E7	987	581.52	460.35	1.0903	1.04181e-34	Up	GO:0009535//chloroplast thylakoid membrane;GO:0019898//extrinsic component of membrane;GO:0016021//integral component of membrane;GO:0009654//photosystem II oxygen evolving complex	GO:0005509//calcium ion binding	GO:0042549//photosystem II stabilization	K02716//photosystem II oxygen-evolving enhancer protein 1	gi|951006814|ref|XP_014508555.1|//PREDICTED: oxygen-evolving enhancer protein 1, chloroplastic [Vigna radiata var. radiata]
Aradu.6J7KI	3122	690.8	298.11	1.96563	6.08964e-96	Up	NA	NA	NA	K12471//epsin;K10706//senataxin [EC:3.6.4.-];K20724//transmembrane protein 33;K11968//ariadne-1 [EC:2.3.2.27]	gi|731396583|ref|XP_010652564.1|//PREDICTED: serine/threonine-protein phosphatase 7 long form homolog [Vitis vinifera];gi|147780218|emb|CAN72427.1|//hypothetical protein VITISV_008825 [Vitis vinifera]
Aradu.6K9J9	424	32.25	153.97	-1.50207	3.26198e-10	Down	NA	NA	NA	NA	NA
Aradu.6PD7Q	1907	335.03	253.53	1.15534	1.46194e-22	Up	NA	GO:0045552//dihydrokaempferol 4-reductase activity;GO:0016491//oxidoreductase activity;GO:0050662//coenzyme binding	GO:0055114//oxidation-reduction process	K13082//bifunctional dihydroflavonol 4-reductase/flavanone 4-reductase [EC:1.1.1.219 1.1.1.234]	gi|73661157|dbj|BAE19953.1|//dihydroflavonol 4-reductase [Lotus japonicus]
Aradu.6Q02G	2739	53.93	563.26	-2.63143	1.56616e-66	Down	GO:0016020//membrane;GO:0044464//cell part	GO:0051119//sugar transmembrane transporter activity	NA	K08494//novel plant SNARE;K15378//solute carrier family 45, member 1/2/4	gi|920715687|gb|KOM55775.1|//hypothetical protein LR48_Vigan10g166700 [Vigna angularis];gi|950930476|ref|XP_014504492.1|//PREDICTED: sucrose transport protein SUC8-like [Vigna radiata var. radiata]
Aradu.6R43S	1305	32.84	189.61	-1.7763	4.83575e-15	Down	NA	NA	NA	K09667//protein O-GlcNAc transferase [EC:2.4.1.255];K09519//DnaJ homolog subfamily B member 13	gi|357483793|ref|XP_003612183.1|//Ulp1 protease family, carboxy-terminal domain protein [Medicago truncatula];gi|734324188|gb|KHN04963.1|//Putative UDP-N-acetylglucosamine--peptide N-acetylglucosaminyltransferase SEC [Glycine soja]
Aradu.6V6N8	1684	236.34	926.05	-1.21702	6.79823e-39	Down	NA	NA	NA	NA	gi|955353693|ref|XP_014620202.1|//PREDICTED: uncharacterized protein LOC100818608 [Glycine max];gi|951060164|ref|XP_014522551.1|//PREDICTED: uncharacterized protein LOC106779039 [Vigna radiata var. radiata]
Aradu.6VX3K	2659	731.81	537.34	1.19884	4.30569e-50	Up	NA	GO:0046983//protein dimerization activity	NA	K04733//interleukin-1 receptor-associated kinase 4 [EC:2.7.11.1];K13422//transcription factor MYC2	gi|356522616|ref|XP_003529942.1|//PREDICTED: transcription factor EGL1-like [Glycine max]
Aradu.6Y02P	1038	70	58.97	1.00058	4.01963e-05	Up	NA	NA	NA	NA	gi|951028598|ref|XP_014514467.1|//PREDICTED: uncharacterized protein LOC106772529 [Vigna radiata var. radiata];gi|356526137|ref|XP_003531676.1|//PREDICTED: uncharacterized protein LOC100812629 [Glycine max]
Aradu.6YC20	399	83	64	1.12825	1.17736e-06	Up	NA	NA	NA	NA	gi|593792016|ref|XP_007159047.1|//hypothetical protein PHAVU_002G204200g [Phaseolus vulgaris]
Aradu.70C45	522	24	102	-1.33426	2.10558e-06	Down	NA	NA	NA	NA	gi|356526137|ref|XP_003531676.1|//PREDICTED: uncharacterized protein LOC100812629 [Glycine max]
Aradu.70DQ7	510	116	12	4.02623	3.70828e-34	Up	NA	NA	NA	K13449//pathogenesis-related protein 1	gi|356554880|ref|XP_003545770.1|//PREDICTED: pathogenesis-related protein 1-like [Glycine max]
Aradu.71EUZ	1074	1218	879.3	1.22329	6.31862e-85	Up	NA	GO:0008270//zinc ion binding	NA	NA	gi|356512343|ref|XP_003524879.1|//PREDICTED: helicase-like transcription factor [Glycine max]
Aradu.7244H	858	19.71	286.12	-3.10641	1.33315e-40	Down	NA	GO:0004088//carbamoyl-phosphate synthase (glutamine-hydrolyzing) activity	GO:0009965//leaf morphogenesis	K13944	gi|955348530|ref|XP_003537315.2|//PREDICTED: LOB domain-containing protein 12-like [Glycine max]
Aradu.72VHJ	3474	811.3	357.52	1.93542	3.70047e-110	Up	GO:0016020//membrane;GO:0016021//integral component of membrane	NA	GO:0006810//transport	K20368//protein cornichon	gi|356497177|ref|XP_003517439.1|//PREDICTED: protein cornichon homolog 4 [Glycine max]
Aradu.73C42	3320	266.74	1113.49	-1.30838	8.51467e-52	Down	GO:0016021//integral component of membrane	GO:0050664//oxidoreductase activity, acting on NAD(P)H, oxygen as acceptor;GO:0005509//calcium ion binding;GO:0004601//peroxidase activity	GO:0098869//cellular oxidant detoxification;GO:0055114//oxidation-reduction process	K13447//respiratory burst oxidase [EC:1.6.3.- 1.11.1.-]	gi|571476753|ref|XP_006587062.1|//PREDICTED: respiratory burst oxidase homolog protein E-like [Glycine max]
Aradu.73PA3	1127	186.49	2043.68	-2.70079	4.62665e-244	Down	GO:0005737//cytoplasm	GO:0004364//glutathione transferase activity	GO:0006749//glutathione metabolic process;GO:0010731//protein glutathionylation	K00799//glutathione S-transferase [EC:2.5.1.18]	gi|959092446|ref|NP_001304567.1|//glutathione S-transferase L3 [Glycine max]
Aradu.73TIL	536	40	162.58	-1.26987	1.16515e-08	Down	NA	NA	NA	NA	gi|947041234|gb|KRG90958.1|//hypothetical protein GLYMA_20G124500 [Glycine max]
Aradu.74N2Q	2791	1308.8	1037.49	1.08835	7.29209e-76	Up	GO:0005737//cytoplasm	GO:0003723//RNA binding;GO:0000166//nucleotide binding	NA	K13126//polyadenylate-binding protein	gi|356576101|ref|XP_003556172.1|//PREDICTED: polyadenylate-binding protein 3-like [Glycine max]
Aradu.74USF	1047	246.64	143.43	1.53527	1.76212e-25	Up	NA	NA	NA	NA	NA
Aradu.750BQ	1651	286.55	1396.84	-1.5321	1.67583e-81	Down	GO:0005634//nucleus	GO:0004712//protein serine/threonine/tyrosine kinase activity;GO:0003677//DNA binding;GO:0004674//protein serine/threonine kinase activity;GO:0005524//ATP binding;GO:0003746//translation elongation factor activity	GO:0006468//protein phosphorylation;GO:0006414//translational elongation;GO:0006351//transcription, DNA-templated	K02542//DNA replication licensing factor MCM6 [EC:3.6.4.12];K08832//serine/threonine-protein kinase SRPK3 [EC:2.7.11.1];K01661//naphthoate synthase [EC:4.1.3.36]	gi|951064064|ref|XP_014523424.1|//PREDICTED: probable mediator of RNA polymerase II transcription subunit 26c [Vigna radiata var. radiata];gi|629090240|gb|KCW56493.1|//hypothetical protein EUGRSUZ_I02219 [Eucalyptus grandis];gi|502161765|ref|XP_004512277.1|//PREDICTED: SRSF protein kinase 1-like [Cicer arietinum]
Aradu.75FRQ	1544	1721.06	1429.82	1.02067	1.57496e-89	Up	NA	NA	NA	K04733//interleukin-1 receptor-associated kinase 4 [EC:2.7.11.1];K14794//ribosomal RNA-processing protein 12;K12309//beta-galactosidase [EC:3.2.1.23]	gi|571492419|ref|XP_003540744.2|//PREDICTED: protein indeterminate-domain 9-like [Glycine max];gi|950936385|ref|XP_014518677.1|//PREDICTED: protein indeterminate-domain 9 [Vigna radiata var. radiata]
Aradu.75JFY	583	256	84	2.36089	1.39791e-45	Up	GO:0016020//membrane	NA	NA	NA	gi|46389839|dbj|BAD15402.1|//hypothetical protein [Oryza sativa Japonica Group];gi|947086531|gb|KRH35252.1|//hypothetical protein GLYMA_10G232100 [Glycine max]
Aradu.768A8	1362	106.18	67.61	1.40441	1.19653e-10	Up	NA	GO:0008168//methyltransferase activity;GO:0008270//zinc ion binding	GO:0032259//methylation	K11446//histone demethylase JARID1 [EC:1.14.11.-];K11643//chromodomain-helicase-DNA-binding protein 4 [EC:3.6.4.12]	gi|593331702|ref|XP_007139277.1|//hypothetical protein PHAVU_008G015700g [Phaseolus vulgaris]
Aradu.76EJ2	858	709.97	577	1.05239	9.41064e-40	Up	GO:0005634//nucleus	GO:0003677//DNA binding;GO:0003700//transcription factor activity, sequence-specific DNA binding	GO:0007623//circadian rhythm;GO:0006355//regulation of transcription, DNA-templated;GO:0009909//regulation of flower development	K14491//two-component response regulator ARR-B family	gi|950939704|ref|XP_014491656.1|//PREDICTED: transcription factor PCL1-like [Vigna radiata var. radiata]
Aradu.787RK	600	21	74	-1.06393	0.000468955	Down	NA	GO:0003824//catalytic activity	GO:0006139//nucleobase-containing compound metabolic process;GO:0006796//phosphate-containing compound metabolic process	NA	gi|947125396|gb|KRH73602.1|//hypothetical protein GLYMA_02G283200 [Glycine max]
Aradu.78PP9	1130	0	62.73	-6.21788	2.65948e-13	Down	NA	NA	NA	K20296//vacuolar protein sorting-associated protein 51	gi|734398786|gb|KHN30642.1|//Protein fat-free like [Glycine soja];gi|947083078|gb|KRH31799.1|//hypothetical protein GLYMA_10G013400 [Glycine max]
Aradu.78YAU	1027	57	478	-2.31477	3.45211e-49	Down	NA	NA	NA	NA	NA
Aradu.79A6C	814	64	326.94	-1.59968	1.50577e-21	Down	NA	GO:0046872//metal ion binding	NA	K11649//SWI/SNF related-matrix-associated actin-dependent regulator of chromatin subfamily C	gi|593144113|ref|XP_007131846.1|//hypothetical protein PHAVU_011G046200g [Phaseolus vulgaris]
Aradu.79PL2	965	212.71	148.61	1.27056	4.39557e-17	Up	NA	NA	GO:0006351//transcription, DNA-templated	K12581//CCR4-NOT transcription complex subunit 7/8;K13126//polyadenylate-binding protein;K01054//acylglycerol lipase [EC:3.1.1.23]	gi|356527600|ref|XP_003532396.1|//PREDICTED: NAC domain-containing protein 83-like [Glycine max]
Aradu.7B3CD	1715	189.9	57.96	2.46532	6.35794e-36	Up	GO:0005634//nucleus	NA	GO:0051301//cell division;GO:0007067//mitotic nuclear division	K05868//cyclin B	gi|1835260|emb|CAA99990.1|//mitotic cyclin [Sesbania rostrata]
Aradu.7BB6U	1346	560	441	1.09785	7.64929e-34	Up	GO:0010287//plastoglobule;GO:0009535//chloroplast thylakoid membrane;GO:0016021//integral component of membrane;GO:0009941//chloroplast envelope;GO:0009522//photosystem I	GO:0031409//pigment binding;GO:0046872//metal ion binding;GO:0016168//chlorophyll binding	GO:0009768//photosynthesis, light harvesting in photosystem I;GO:0009416//response to light stimulus;GO:0018298//protein-chromophore linkage	K08907//light-harvesting complex I chlorophyll a/b binding protein 1	gi|388491152|gb|AFK33642.1|//unknown [Lotus japonicus]
Aradu.7G515	2014	560.66	2761.02	-1.5468	7.94543e-162	Down	GO:0005829//cytosol	GO:0004674//protein serine/threonine kinase activity;GO:0005524//ATP binding	GO:0018105//peptidyl-serine phosphorylation;GO:0035556//intracellular signal transduction	K08790//serine/threonine kinase 38 [EC:2.7.11.1]	gi|955379955|ref|XP_014625373.1|//PREDICTED: serine/threonine-protein kinase tricorner [Glycine max]
Aradu.7HS2D	1538	14840.4	53993.4	-1.11005	0	Down	GO:0016021//integral component of membrane;GO:0005886//plasma membrane	GO:0022857//transmembrane transporter activity	GO:0055085//transmembrane transport	K07874//Ras-related protein Rab-1A;K00801//farnesyl-diphosphate farnesyltransferase [EC:2.5.1.21]	gi|388503474|gb|AFK39803.1|//unknown [Lotus japonicus]
Aradu.7I46P	727	387.96	1578.9	-1.27173	1.05862e-69	Down	GO:0016020//membrane	NA	NA	NA	gi|255543046|ref|XP_002512586.1|//PREDICTED: hydrophobic protein LTI6A [Ricinus communis]
Aradu.7IB98	465	25	265	-2.65279	1.95435e-32	Down	NA	NA	NA	NA	NA
Aradu.7J6WS	2879	1334.61	6671.28	-1.56834	0	Down	NA	NA	NA	K13172//serine/arginine repetitive matrix protein 2	gi|593685636|ref|XP_007143517.1|//hypothetical protein PHAVU_007G078100g [Phaseolus vulgaris];gi|922349060|ref|XP_003619204.2|//hypothetical protein MTR_6g044600 [Medicago truncatula];gi|947089630|gb|KRH38295.1|//hypothetical protein GLYMA_09G125400 [Glycine max]
Aradu.7J9HW	625	392	280	1.23863	5.71864e-29	Up	NA	NA	NA	NA	gi|920688433|gb|KOM32416.1|//hypothetical protein LR48_Vigan01g197200 [Vigna angularis];gi|593785579|ref|XP_007155830.1|//hypothetical protein PHAVU_003G235100g [Phaseolus vulgaris]
Aradu.7L2S4	1254	1235	841	1.30754	2.36347e-95	Up	GO:0031012//extracellular matrix;GO:0016021//integral component of membrane	GO:0004222//metalloendopeptidase activity;GO:0008270//zinc ion binding	GO:0006508//proteolysis	K07761//metalloendoproteinase 5-MMP [EC:3.4.24.-]	gi|502141260|ref|XP_004504503.1|//PREDICTED: metalloendoproteinase 1 [Cicer arietinum]
Aradu.7L7M7	510	165.14	27.89	3.31908	7.79175e-42	Up	GO:0009536//plastid;GO:0005739//mitochondrion	NA	NA	K01859//chalcone isomerase [EC:5.5.1.6]	gi|357458587|ref|XP_003599574.1|//hypothetical protein MTR_3g035620 [Medicago truncatula]
Aradu.7M0PQ	4887	1001.4	9340.85	-2.46833	0	Down	GO:0005737//cytoplasm	GO:0004642//phosphoribosylformylglycinamidine synthase activity;GO:0005524//ATP binding	GO:0006541//glutamine metabolic process;GO:0006189//'de novo' IMP biosynthetic process	K01952//phosphoribosylformylglycinamidine synthase [EC:6.3.5.3]	gi|502138893|ref|XP_004503568.1|//PREDICTED: probable phosphoribosylformylglycinamidine synthase, chloroplastic/mitochondrial [Cicer arietinum]
Aradu.7MF12	1575	136.01	71.89	1.67306	1.55637e-16	Up	NA	GO:0016831//carboxy-lyase activity;GO:0030170//pyridoxal phosphate binding	GO:0006520//cellular amino acid metabolic process	K01592//tyrosine decarboxylase [EC:4.1.1.25]	gi|734391522|gb|KHN27251.1|//Tyrosine/DOPA decarboxylase 2 [Glycine soja]
Aradu.7N7GR	2734	902.96	659.01	1.20757	4.02365e-62	Up	NA	NA	NA	NA	NA
Aradu.7TW9C	2050	249	5114	-3.60703	0	Down	NA	NA	NA	NA	gi|734350303|gb|KHN12332.1|//hypothetical protein glysoja_034424 [Glycine soja];gi|734315414|gb|KHN01966.1|//hypothetical protein glysoja_045961 [Glycine soja]
Aradu.7U09Y	1215	57	0	7.5861	3.6147e-18	Up	NA	GO:0016787//hydrolase activity	NA	NA	gi|388514297|gb|AFK45210.1|//unknown [Lotus japonicus]
Aradu.7Z02Q	2260	706.73	414.27	1.52379	3.40377e-69	Up	GO:0016021//integral component of membrane;GO:0005886//plasma membrane	GO:0005524//ATP binding;GO:0004672//protein kinase activity	GO:0006468//protein phosphorylation	K04733//interleukin-1 receptor-associated kinase 4 [EC:2.7.11.1]	gi|951023217|ref|XP_014513122.1|//PREDICTED: leucine-rich repeat receptor-like protein kinase PXC1 [Vigna radiata var. radiata]
Aradu.7Z1R6	1528	123	1006	-2.27869	7.0053e-100	Down	NA	GO:0046872//metal ion binding	NA	K16276//zinc finger protein-like protein	gi|955322138|ref|XP_014631388.1|//PREDICTED: uncharacterized protein LOC100801725 isoform X2 [Glycine max];gi|828316606|ref|XP_012572081.1|//PREDICTED: uncharacterized protein LOC101514376 [Cicer arietinum];gi|118764601|dbj|BAF38781.1|//putative E3 ubiquitin ligase [Lotus japonicus];gi|802797472|ref|XP_012093030.1|//PREDICTED: uncharacterized protein LOC105650696 [Jatropha curcas]
Aradu.7ZK0R	1559	144	62.01	1.9687	2.44179e-21	Up	GO:0005576//extracellular region	GO:0020037//heme binding;GO:0046872//metal ion binding;GO:0004601//peroxidase activity	GO:0006979//response to oxidative stress;GO:0098869//cellular oxidant detoxification;GO:0042744//hydrogen peroxide catabolic process;GO:0055114//oxidation-reduction process	K00430//peroxidase [EC:1.11.1.7]	gi|357448431|ref|XP_003594491.1|//peroxidase family protein [Medicago truncatula]
Aradu.802R8	3503	0	801.84	-9.89396	4.53222e-107	Down	GO:0030897//HOPS complex;GO:0009506//plasmodesma;GO:0005622//intracellular	NA	GO:0006886//intracellular protein transport;GO:0097576//vacuole fusion;GO:0016192//vesicle-mediated transport	K20183//Vam6/Vps39-like protein vacuolar protein sorting-associated protein 39	gi|502153212|ref|XP_004509258.1|//PREDICTED: vam6/Vps39-like protein isoform X2 [Cicer arietinum]
Aradu.805L3	2405	311.3	1355.43	-1.36917	4.10055e-67	Down	GO:0016021//integral component of membrane	NA	NA	K15015//solute carrier family 32 (vesicular inhibitory amino acid transporter)	gi|734409117|gb|KHN35212.1|//Vacuolar amino acid transporter 1 [Glycine soja];gi|571440698|ref|XP_006575238.1|//PREDICTED: amino acid transporter ANTL1-like [Glycine max];gi|947123727|gb|KRH71933.1|//hypothetical protein GLYMA_02G179100 [Glycine max]
Aradu.80EN4	2941	414.87	7857.06	-3.49005	0	Down	GO:0005634//nucleus	GO:0003677//DNA binding	GO:0006355//regulation of transcription, DNA-templated	K12133//MYB-related transcription factor LHY	gi|502114151|ref|XP_004494878.1|//PREDICTED: protein LHY isoform X1 [Cicer arietinum];gi|571560842|ref|XP_006604919.1|//PREDICTED: protein LHY isoform X2 [Glycine max]
Aradu.80TED	1528	110.76	71.54	1.38382	7.9212e-11	Up	NA	GO:0003824//catalytic activity;GO:0050662//coenzyme binding	NA	K03178//ubiquitin-activating enzyme E1 [EC:6.2.1.45]	gi|357437673|ref|XP_003589112.1|//3-oxo-delta(4,5)-steroid 5-beta-reductase-like protein [Medicago truncatula]
Aradu.80WBV	2279	9487.18	2380.78	2.74775	0	Up	GO:0005618//cell wall	GO:0004252//serine-type endopeptidase activity	GO:0006508//proteolysis	K04733//interleukin-1 receptor-associated kinase 4 [EC:2.7.11.1];K13199//plasminogen activator inhibitor 1 RNA-binding protein;K12663//Delta(3,5)-Delta(2,4)-dienoyl-CoA isomerase [EC:5.3.3.-];K01183//chitinase [EC:3.2.1.14]	gi|525507411|ref|NP_001267495.1|//SUB1 homolog precursor [Glycine max];gi|356510927|ref|XP_003524185.1|//PREDICTED: subtilisin-like protease SBT5.3 [Glycine max]
Aradu.814QD	945	0	678.26	-9.65249	6.37354e-94	Down	GO:0048046//apoplast;GO:0005829//cytosol;GO:0009507//chloroplast	GO:0004347//glucose-6-phosphate isomerase activity;GO:0008964//phosphoenolpyruvate carboxylase activity	GO:0006099//tricarboxylic acid cycle;GO:0015977//carbon fixation;GO:0006094//gluconeogenesis;GO:0006096//glycolytic process;GO:0015979//photosynthesis;GO:0048366//leaf development	K01810//glucose-6-phosphate isomerase [EC:5.3.1.9];K01595//phosphoenolpyruvate carboxylase [EC:4.1.1.31]	gi|950979579|ref|XP_014501897.1|//PREDICTED: glucose-6-phosphate isomerase, cytosolic [Vigna radiata var. radiata];gi|661895172|emb|CDP00977.1|//unnamed protein product [Coffea canephora]
Aradu.819DH	2117	1498.93	874.99	1.5298	7.62055e-146	Up	GO:0009505//plant-type cell wall;GO:0016021//integral component of membrane;GO:0046658//anchored component of plasma membrane	GO:0004553//hydrolase activity, hydrolyzing O-glycosyl compounds;GO:0030247//polysaccharide binding	GO:0005975//carbohydrate metabolic process	K19892//glucan endo-1,3-beta-glucosidase 4 [EC:3.2.1.39];K19891//glucan endo-1,3-beta-glucosidase 1/2/3 [EC:3.2.1.39]	gi|920718650|gb|KOM57847.1|//hypothetical protein LR48_Vigan11g088000 [Vigna angularis]
Aradu.823H0	1532	204.49	1143.17	-1.72973	1.96315e-79	Down	GO:0016021//integral component of membrane;GO:0005622//intracellular	GO:0000155//phosphorelay sensor kinase activity	GO:0023014//signal transduction by protein phosphorylation;GO:0000160//phosphorelay signal transduction system	K14489//arabidopsis histidine kinase 2/3/4 (cytokinin receptor) [EC:2.7.13.3]	gi|965657971|dbj|BAT74390.1|//hypothetical protein VIGAN_01205300 [Vigna angularis var. angularis];gi|951075888|ref|XP_014493084.1|//PREDICTED: histidine kinase 3 [Vigna radiata var. radiata]
Aradu.82ABY	1062	90.11	45.62	1.73523	4.82716e-12	Up	NA	GO:0000166//nucleotide binding;GO:0004672//protein kinase activity	GO:0016310//phosphorylation	K04733//interleukin-1 receptor-associated kinase 4 [EC:2.7.11.1]	gi|965599568|dbj|BAT86746.1|//hypothetical protein VIGAN_05005400 [Vigna angularis var. angularis]
Aradu.82FMJ	643	194	105	1.63887	2.95138e-22	Up	NA	NA	NA	NA	NA
Aradu.84QJ1	565	243.82	91.13	2.17303	1.74987e-39	Up	NA	NA	NA	NA	NA
Aradu.862GA	960	239	126	1.67679	7.10921e-28	Up	NA	GO:0003677//DNA binding	NA	K09422//myb proto-oncogene protein, plant	gi|563425561|gb|AHB59595.1|//putative R2R3 MYB protein 7 [Arachis hypogaea]
Aradu.865GB	435	312	0	10.0386	2.56835e-69	Up	NA	NA	NA	NA	NA
Aradu.87AY8	868	2493.33	2087.53	1.00948	1.02218e-126	Up	NA	NA	NA	K12471//epsin;K12448//UDP-arabinose 4-epimerase [EC:5.1.3.5];K11254//histone H4;K19042//E3 ubiquitin-protein ligase BOI and related proteins [EC:2.3.2.27]	gi|971547703|ref|XP_006345944.2|//PREDICTED: uncharacterized protein LOC102605056 [Solanum tuberosum];gi|965616142|dbj|BAU01292.1|//hypothetical protein VIGAN_11049700 [Vigna angularis var. angularis]
Aradu.87BHP	1209	411	342	1.01835	1.50289e-22	Up	NA	NA	NA	NA	NA
Aradu.87JYI	1653	28	667	-3.82098	5.78912e-109	Down	NA	NA	NA	K01074//palmitoyl-protein thioesterase [EC:3.1.2.22];K03798//cell division protease FtsH [EC:3.4.24.-];K13800//UMP-CMP kinase [EC:2.7.4.- 2.7.4.14]	gi|922337651|ref|XP_013446815.1|//TLD-domain nucleolar protein [Medicago truncatula];gi|470145811|ref|XP_004308527.1|//PREDICTED: pentatricopeptide repeat-containing protein At1g71460, chloroplastic [Fragaria vesca subsp. vesca]
Aradu.88SWU	1857	176.45	857.76	-1.52811	1.7705e-50	Down	NA	NA	NA	K10755//replication factor C subunit 2/4	gi|950935913|ref|XP_014517621.1|//PREDICTED: uncharacterized protein LOC106775091 [Vigna radiata var. radiata];gi|920716481|gb|KOM56569.1|//hypothetical protein LR48_Vigan10g246100 [Vigna angularis]
Aradu.89N3H	1559	16	90	-1.73865	7.75938e-08	Down	NA	NA	NA	K10393//kinesin family member 2/24	NA
Aradu.8AQ1Z	1286	990.05	487.9	1.77412	2.54536e-119	Up	GO:0005576//extracellular region	GO:0020037//heme binding;GO:0046872//metal ion binding;GO:0004601//peroxidase activity	GO:0006979//response to oxidative stress;GO:0098869//cellular oxidant detoxification;GO:0042744//hydrogen peroxide catabolic process;GO:0055114//oxidation-reduction process	K00430//peroxidase [EC:1.11.1.7]	gi|593787380|ref|XP_007156729.1|//hypothetical protein PHAVU_002G012300g [Phaseolus vulgaris]
Aradu.8BA60	2232	36.4	1810.88	-4.8834	0	Down	GO:0005634//nucleus;GO:0005829//cytosol;GO:0009507//chloroplast	GO:0003690//double-stranded DNA binding;GO:0016791//phosphatase activity	GO:0006260//DNA replication;GO:0016311//dephosphorylation;GO:0006974//cellular response to DNA damage stimulus	K13102//DNA/RNA-binding protein KIN17;K15634//probable phosphoglycerate mutase [EC:5.4.2.12]	gi|593199718|ref|XP_007132387.1|//hypothetical protein PHAVU_011G090600g [Phaseolus vulgaris];gi|356542713|ref|XP_003539810.1|//PREDICTED: probable 2-carboxy-D-arabinitol-1-phosphatase [Glycine max];gi|502099007|ref|XP_004491366.1|//PREDICTED: DNA/RNA-binding protein KIN17-like [Cicer arietinum]
Aradu.8C7UR	2157	291.49	1075.78	-1.13066	3.95323e-40	Down	GO:0016021//integral component of membrane	NA	NA	NA	gi|356529105|ref|XP_003533137.1|//PREDICTED: uncharacterized protein LOC100778592 [Glycine max]
Aradu.8D1HB	914	68	30	1.93378	9.60419e-11	Up	NA	NA	NA	NA	gi|734346877|gb|KHN11141.1|//hypothetical protein glysoja_039404 [Glycine soja];gi|502099573|ref|XP_004491512.1|//PREDICTED: uncharacterized protein LOC101512908 [Cicer arietinum]
Aradu.8D21Y	730	9	196	-3.69158	2.06019e-32	Down	NA	NA	NA	NA	NA
Aradu.8D75I	1999	4	923.67	-7.09803	1.96482e-166	Down	GO:0016021//integral component of membrane;GO:0005737//cytoplasm	GO:0003872//6-phosphofructokinase activity;GO:0046872//metal ion binding;GO:0004674//protein serine/threonine kinase activity;GO:0005524//ATP binding	GO:0006002//fructose 6-phosphate metabolic process;GO:0006468//protein phosphorylation;GO:0061615//glycolytic process through fructose-6-phosphate	K00850//6-phosphofructokinase 1 [EC:2.7.1.11]	gi|965657819|dbj|BAT74238.1|//hypothetical protein VIGAN_01186100 [Vigna angularis var. angularis];gi|661890887|emb|CDP05464.1|//unnamed protein product [Coffea canephora];gi|951003900|ref|XP_014507729.1|//PREDICTED: serine/threonine-protein kinase BRI1-like 2 [Vigna radiata var. radiata];gi|947100520|gb|KRH49012.1|//hypothetical protein GLYMA_07G126400 [Glycine max]
Aradu.8DJ4R	1463	1405.39	718.32	1.72148	7.24521e-162	Up	GO:0031224//intrinsic component of membrane	NA	NA	K17964//leucine-rich PPR motif-containing protein, mitochondrial	gi|571494376|ref|XP_006592832.1|//PREDICTED: uncharacterized GPI-anchored protein At4g28100-like [Glycine max]
Aradu.8E0AS	769	13726.6	1638.16	3.82003	0	Up	NA	NA	NA	NA	gi|502130923|ref|XP_004500816.1|//PREDICTED: MATH and LRR domain-containing protein PFE0570w [Cicer arietinum];gi|48426429|emb|CAA66109.3|//specific tissue protein 2, partial [Cicer arietinum]
Aradu.8EU70	1722	210.43	65.43	2.43852	3.73546e-39	Up	NA	GO:0010997//anaphase-promoting complex binding;GO:0097027//ubiquitin-protein transferase activator activity	GO:0050790//regulation of catalytic activity	K03364//cell division cycle 20-like protein 1, cofactor of APC complex	gi|703099212|ref|XP_010096587.1|//Protein FIZZY-RELATED 3 [Morus notabilis];gi|593800756|ref|XP_007163415.1|//hypothetical protein PHAVU_001G232800g [Phaseolus vulgaris]
Aradu.8G3D2	2940	202.75	857.42	-1.32709	4.03606e-41	Down	NA	NA	NA	K07466//replication factor A1	gi|645303661|ref|XP_008245910.1|//PREDICTED: uncharacterized protein LOC103344060, partial [Prunus mume];gi|674929074|emb|CDY04215.1|//BnaC06g26000D [Brassica napus]
Aradu.8G4YR	3570	248.14	970.05	-1.2137	1.69671e-40	Down	NA	GO:0005488//binding	NA	K02958//small subunit ribosomal protein S15e	gi|734406897|gb|KHN34126.1|//hypothetical protein glysoja_038615 [Glycine soja];gi|955304282|ref|XP_014632852.1|//PREDICTED: uncharacterized protein LOC100799306 isoform X5 [Glycine max]
Aradu.8I79H	2116	866.84	3094.53	-1.08268	6.62505e-105	Down	GO:0005634//nucleus;GO:0005829//cytosol;GO:0016021//integral component of membrane	GO:0032440//2-alkenal reductase [NAD(P)] activity;GO:0042132//fructose 1,6-bisphosphate 1-phosphatase activity	GO:0005986//sucrose biosynthetic process;GO:0009750//response to fructose;GO:0055114//oxidation-reduction process;GO:0009737//response to abscisic acid;GO:0005975//carbohydrate metabolic process;GO:0016311//dephosphorylation;GO:0005983//starch catabolic process;GO:0030388//fructose 1,6-bisphosphate metabolic process;GO:0015979//photosynthesis	K03841//fructose-1,6-bisphosphatase I [EC:3.1.3.11]	gi|720015724|ref|XP_010260929.1|//PREDICTED: fructose-1,6-bisphosphatase, cytosolic [Nelumbo nucifera]
Aradu.8IZ03	766	41	169	-1.29012	4.07605e-09	Down	GO:0005622//intracellular	GO:0005525//GTP binding	GO:0007264//small GTPase mediated signal transduction	K07955//ADP-ribosylation factor-like protein 8	gi|568867167|ref|XP_006486915.1|//PREDICTED: ADP-ribosylation factor-like protein 8A [Citrus sinensis]
Aradu.8K8TN	1205	74.15	1152.51	-3.20498	3.16155e-163	Down	GO:0005887//integral component of plasma membrane;GO:0009506//plasmodesma;GO:0005773//vacuole	GO:0015250//water channel activity;GO:0015254//glycerol channel activity	GO:0006833//water transport;GO:0034220//ion transmembrane transport;GO:0009992//cellular water homeostasis;GO:0015793//glycerol transport	K09872//aquaporin PIP	gi|359806793|ref|NP_001241050.1|//uncharacterized protein LOC100791447 [Glycine max]
Aradu.8KH6E	3068	2232.45	1845.05	1.02817	4.65486e-117	Up	NA	GO:0003824//catalytic activity	NA	K08332;K09260//MADS-box transcription enhancer factor 2A;K04454//MADS-box transcription enhancer factor 2C	gi|734338418|gb|KHN08793.1|//U-box domain-containing protein 21 [Glycine soja]
Aradu.8LV0D	1607	196.2	137.14	1.26988	7.08749e-16	Up	GO:0005829//cytosol;GO:0016021//integral component of membrane	GO:0008732//L-allo-threonine aldolase activity	GO:0006545//glycine biosynthetic process;GO:0006567//threonine catabolic process	K01620//threonine aldolase [EC:4.1.2.48]	gi|951071977|ref|XP_014491464.1|//PREDICTED: probable low-specificity L-threonine aldolase 1 [Vigna radiata var. radiata];gi|920715590|gb|KOM55678.1|//hypothetical protein LR48_Vigan10g157000 [Vigna angularis]
Aradu.8M36C	1481	162.24	109.7	1.31777	4.10047e-14	Up	NA	NA	NA	K18183//cytochrome c oxidase assembly protein subunit 19;K15601//lysine-specific demethylase 3 [EC:1.14.11.-]	gi|734411799|gb|KHN36185.1|//Cell division cycle-associated 7-like protein [Glycine soja];gi|920701843|gb|KOM45068.1|//hypothetical protein LR48_Vigan06g037400 [Vigna angularis]
Aradu.8MU6L	519	48.75	24.03	1.77377	1.85481e-07	Up	NA	NA	NA	K19038//E3 ubiquitin-protein ligase ATL41 [EC:2.3.2.27];K10664//E3 ubiquitin-protein ligase ATL6/9/15/31/42/55 [EC:2.3.2.27];K16286//E3 ubiquitin-protein ligase EL5 [EC:2.3.2.27]	gi|950949995|ref|XP_014495285.1|//PREDICTED: RING-H2 finger protein ATL66-like [Vigna radiata var. radiata]
Aradu.8N23N	779	933	760	1.04908	1.83228e-51	Up	NA	NA	NA	NA	NA
Aradu.8NU5X	2745	1489.13	8627.38	-1.78125	0	Down	NA	NA	NA	K07466//replication factor A1	gi|698525996|ref|XP_009759827.1|//PREDICTED: uncharacterized protein LOC104212304 [Nicotiana sylvestris];gi|357491997|ref|XP_003616287.1|//replication factor-A carboxy-terminal domain protein [Medicago truncatula];gi|731378708|ref|XP_010668249.1|//PREDICTED: replication protein A 70 kDa DNA-binding subunit B-like, partial [Beta vulgaris subsp. vulgaris]
Aradu.8PE87	1309	362.26	173.8	1.8128	5.70992e-46	Up	GO:0042720//mitochondrial inner membrane peptidase complex;GO:0016021//integral component of membrane	GO:0004252//serine-type endopeptidase activity;GO:0008236//serine-type peptidase activity	GO:0006627//protein processing involved in protein targeting to mitochondrion;GO:0006508//proteolysis;GO:0033108//mitochondrial respiratory chain complex assembly;GO:0006465//signal peptide processing	K09647//mitochondrial inner membrane protease subunit 1 [EC:3.4.21.-]	gi|502158139|ref|XP_004511043.1|//PREDICTED: mitochondrial inner membrane protease subunit 1-like [Cicer arietinum]
Aradu.8QB2V	2155	288.06	226.28	1.10147	2.64706e-18	Up	NA	NA	NA	K20285//Rab9 effector protein with kelch motifs	gi|571565694|ref|XP_006605801.1|//PREDICTED: rab9 effector protein with kelch motifs-like [Glycine max]
Aradu.8S0BF	1400	205	41	3.07513	3.01046e-48	Up	GO:0016020//membrane	NA	NA	K12178//COP9 signalosome complex subunit 4	gi|965608276|dbj|BAT94767.1|//hypothetical protein VIGAN_08139900 [Vigna angularis var. angularis];gi|645235150|ref|XP_008224139.1|//PREDICTED: tetratricopeptide repeat protein 7B-like [Prunus mume];gi|920692323|gb|KOM35548.1|//hypothetical protein LR48_Vigan02g169800 [Vigna angularis];gi|593685722|ref|XP_007143548.1|//hypothetical protein PHAVU_007G080900g [Phaseolus vulgaris]
Aradu.8VB5P	794	366.48	1247.77	-1.01434	4.77714e-39	Down	GO:0016021//integral component of membrane	NA	GO:0006950//response to stress;GO:0009737//response to abscisic acid	K17279//receptor expression-enhancing protein 5/6	gi|357465013|ref|XP_003602788.1|//TB2/DP1, HVA22 family protein [Medicago truncatula]
Aradu.8VI8X	2029	2305.57	1050.95	1.88664	5.57516e-300	Up	GO:0005618//cell wall;GO:0005737//cytoplasm	GO:0016829//lyase activity;GO:0045330//aspartyl esterase activity;GO:0030599//pectinesterase activity	GO:0045490//pectin catabolic process;GO:0042545//cell wall modification	K01051//pectinesterase [EC:3.1.1.11]	gi|357520829|ref|XP_003630703.1|//pectinesterase [Medicago truncatula];gi|502138689|ref|XP_004503496.1|//PREDICTED: probable pectinesterase 53 [Cicer arietinum]
Aradu.90KNZ	1228	477	5.53	7.18377	3.02267e-144	Up	GO:0005886//plasma membrane	GO:0005524//ATP binding;GO:0004714//transmembrane receptor protein tyrosine kinase activity	GO:0018108//peptidyl-tyrosine phosphorylation	K04733//interleukin-1 receptor-associated kinase 4 [EC:2.7.11.1]	gi|571494234|ref|XP_006592789.1|//PREDICTED: probable receptor-like protein kinase At1g49730 isoform X1 [Glycine max]
Aradu.90TGE	2420	244.08	880.58	-1.09789	1.10083e-31	Down	NA	GO:0003954//NADH dehydrogenase activity;GO:0005509//calcium ion binding;GO:0016491//oxidoreductase activity	GO:0055114//oxidation-reduction process	K17871//NADH:ubiquinone reductase (non-electrogenic) [EC:1.6.5.9]	gi|965657384|dbj|BAT73803.1|//hypothetical protein VIGAN_01134000 [Vigna angularis var. angularis]
Aradu.919C4	1046	1116.87	4407.43	-1.22727	1.73004e-181	Down	GO:0016020//membrane	NA	NA	K14009//B-cell receptor-associated protein 31	gi|357471347|ref|XP_003605958.1|//B-cell receptor-associated-like protein [Medicago truncatula]
Aradu.91JGK	1228	2	158	-5.55057	4.36164e-31	Down	GO:0016020//membrane	GO:0016301//kinase activity	NA	K13418//somatic embryogenesis receptor kinase 1 [EC:2.7.10.1 2.7.11.1];K04733//interleukin-1 receptor-associated kinase 4 [EC:2.7.11.1];K00924;K20718//LRR receptor-like serine/threonine-protein kinase ERECTA [EC:2.7.11.1]	gi|922360689|ref|XP_013454265.1|//LRR receptor-like kinase [Medicago truncatula];gi|828295981|ref|XP_012568559.1|//PREDICTED: probable leucine-rich repeat receptor-like serine/threonine-protein kinase At3g14840 [Cicer arietinum]
Aradu.920JZ	1434	478.65	282.4	1.51444	5.68251e-47	Up	GO:0016021//integral component of membrane	GO:0046872//metal ion binding;GO:0030570//pectate lyase activity	GO:0045490//pectin catabolic process	K01728//pectate lyase [EC:4.2.2.2]	gi|356575512|ref|XP_003555884.1|//PREDICTED: probable pectate lyase 12 [Glycine max];gi|951023874|ref|XP_014513277.1|//PREDICTED: probable pectate lyase 18 [Vigna radiata var. radiata]
Aradu.924GX	2156	261.95	114.16	1.95144	4.80046e-37	Up	NA	GO:0033926//glycopeptide alpha-N-acetylgalactosaminidase activity;GO:0003824//catalytic activity	NA	K11593//eukaryotic translation initiation factor 2C	gi|920699042|gb|KOM42267.1|//hypothetical protein LR48_Vigan04g246500 [Vigna angularis];gi|502130711|ref|XP_004500744.1|//PREDICTED: probable alkaline/neutral invertase B [Cicer arietinum]
Aradu.9255Z	1824	239.54	94	2.10274	2.60415e-37	Up	NA	NA	NA	K10523//speckle-type POZ protein	gi|356567678|ref|XP_003552044.1|//PREDICTED: BTB/POZ domain-containing protein At1g67900-like [Glycine max];gi|951066545|ref|XP_014523987.1|//PREDICTED: BTB/POZ domain-containing protein At1g67900-like [Vigna radiata var. radiata]
Aradu.92CC5	2015	13.54	1024.48	-5.48831	1.40526e-192	Down	NA	GO:0016787//hydrolase activity;GO:0000166//nucleotide binding;GO:0005525//GTP binding;GO:0003924//GTPase activity	NA	K14754//interferon-induced GTP-binding protein Mx1;K17065//dynamin 1-like protein [EC:3.6.5.5]	gi|920686863|gb|KOM30846.1|//hypothetical protein LR48_Vigan01g040100 [Vigna angularis];gi|951064155|ref|XP_014523444.1|//PREDICTED: dynamin-related protein 4C [Vigna radiata var. radiata]
Aradu.92LSD	1309	23.47	3754.18	-6.56833	0	Down	NA	NA	NA	NA	gi|593781261|ref|XP_007153671.1|//hypothetical protein PHAVU_003G055000g [Phaseolus vulgaris];gi|955337556|ref|XP_014634813.1|//PREDICTED: uncharacterized protein LOC100779114 isoform X3 [Glycine max]
Aradu.92QJW	1401	297.36	185.72	1.43229	1.45742e-27	Up	NA	NA	NA	K04733//interleukin-1 receptor-associated kinase 4 [EC:2.7.11.1]	gi|351723221|ref|NP_001238551.1|//serine-threonine kinase [Glycine max]
Aradu.92XHB	1034	22.2	110.54	-1.56273	3.57627e-08	Down	GO:0005634//nucleus	GO:0032440//2-alkenal reductase [NAD(P)] activity;GO:0003677//DNA binding;GO:0003700//transcription factor activity, sequence-specific DNA binding;GO:0046983//protein dimerization activity	GO:0010077//maintenance of inflorescence meristem identity;GO:0010154//fruit development;GO:0006355//regulation of transcription, DNA-templated;GO:0055114//oxidation-reduction process	K09264//MADS-box transcription factor, plant	gi|502151875|ref|XP_004508656.1|//PREDICTED: truncated transcription factor CAULIFLOWER A [Cicer arietinum]
Aradu.93KPA	1521	8465.65	51135.3	-1.84142	0	Down	GO:0071944//cell periphery	GO:0030599//pectinesterase activity;GO:0046910//pectinesterase inhibitor activity	GO:0071555//cell wall organization	K01051//pectinesterase [EC:3.1.1.11]	gi|734377113|gb|KHN21590.1|//Putative pectinesterase/pectinesterase inhibitor 6 [Glycine soja]
Aradu.942ZP	1334	298.49	146.75	1.77753	3.41362e-37	Up	GO:0016021//integral component of membrane	NA	NA	NA	gi|28194659|gb|AAO33591.1|AF479309_1//putative early light induced protein [Arachis hypogaea]
Aradu.945VS	1660	24.74	235.83	-2.49962	2.65398e-27	Down	NA	NA	NA	K19041//E3 ubiquitin-protein ligase RNF38/44 [EC:2.3.2.27]	gi|502139031|ref|XP_004503620.1|//PREDICTED: RING-H2 finger protein ATL20-like [Cicer arietinum]
Aradu.947SP	1430	35.39	315.45	-2.40279	1.94585e-34	Down	GO:0009505//plant-type cell wall;GO:0005576//extracellular region	GO:0020037//heme binding;GO:0046872//metal ion binding;GO:0004601//peroxidase activity	GO:0006979//response to oxidative stress;GO:0009664//plant-type cell wall organization;GO:0098869//cellular oxidant detoxification;GO:0042744//hydrogen peroxide catabolic process;GO:0055114//oxidation-reduction process	K00430//peroxidase [EC:1.11.1.7]	gi|129808|sp|P22196.1|PER2_ARAHY//RecName: Full=Cationic peroxidase 2; AltName: Full=PNPC2; Flags: Precursor [Arachis hypogaea]
Aradu.94UA3	1035	0	377	-8.80521	7.13162e-59	Down	NA	NA	NA	K03549//KUP system potassium uptake protein	NA
Aradu.951UC	3080	40.29	248.38	-1.87085	1.79328e-20	Down	GO:0005737//cytoplasm	GO:0046872//metal ion binding;GO:0016165//linoleate 13S-lipoxygenase activity	GO:0006633//fatty acid biosynthetic process;GO:0055114//oxidation-reduction process;GO:0031408//oxylipin biosynthetic process	K15718//linoleate 9S-lipoxygenase [EC:1.13.11.58]	gi|767509961|gb|AJT49213.1|//putative lipoxygenase-9 [Arachis hypogaea]
Aradu.9624S	1927	1196.77	332.77	2.59976	3.05333e-231	Up	NA	GO:0001758//retinal dehydrogenase activity;GO:0050269//coniferyl-aldehyde dehydrogenase activity;GO:0004029//aldehyde dehydrogenase (NAD) activity	GO:0055114//oxidation-reduction process	K12355//coniferyl-aldehyde dehydrogenase [EC:1.2.1.68]	gi|356520525|ref|XP_003528912.1|//PREDICTED: aldehyde dehydrogenase family 2 member C4-like isoform X1 [Glycine max]
Aradu.96ZXM	1415	2528.28	719	2.5673	0	Up	GO:0016020//membrane;GO:0016021//integral component of membrane	NA	NA	NA	gi|734355893|gb|KHN14010.1|//hypothetical protein glysoja_041619 [Glycine soja]
Aradu.97018	1178	46	247	-1.6716	1.15106e-17	Down	NA	GO:0004519//endonuclease activity	GO:0090305//nucleic acid phosphodiester bond hydrolysis	K10706//senataxin [EC:3.6.4.-]	gi|965612176|dbj|BAT98315.1|//hypothetical protein VIGAN_09196100 [Vigna angularis var. angularis];gi|920678825|gb|KOM25814.1|//hypothetical protein LR48_Vigan192s001200 [Vigna angularis]
Aradu.970W1	567	95	357	-1.15672	6.64186e-15	Down	GO:0016021//integral component of membrane	NA	NA	K08145//MFS transporter, SP family, solute carrier family 2 (facilitated glucose transporter), member 8	gi|947072069|gb|KRH20960.1|//hypothetical protein GLYMA_13G212400 [Glycine max]
Aradu.9721M	1465	0	587.47	-9.44516	7.24345e-84	Down	NA	NA	NA	K06630//14-3-3 protein epsilon	gi|571492632|ref|XP_006592295.1|//PREDICTED: syndetin-like isoform X2 [Glycine max];gi|734416974|gb|KHN38691.1|//Coiled-coil domain-containing protein 132 [Glycine soja]
Aradu.9729Z	1545	606.85	411.77	1.31271	5.9864e-48	Up	NA	NA	GO:0006351//transcription, DNA-templated	NA	gi|947089532|gb|KRH38197.1|//hypothetical protein GLYMA_09G117500 [Glycine max]
Aradu.97V2G	594	48	30	1.43128	7.59476e-06	Up	NA	NA	NA	K19747//BAHD acyltransferase [EC:2.3.1.-];K18810//cyclin D1/2/4, plant;K01759//lactoylglutathione lyase [EC:4.4.1.5]	gi|502113840|ref|XP_004494776.1|//PREDICTED: uncharacterized protein LOC101496947 [Cicer arietinum]
Aradu.97XZI	891	154.88	723.11	-1.46986	1.63396e-40	Down	NA	NA	NA	K16222//Dof zinc finger protein DOF5.5	gi|908212374|tpg|DAA64930.1|//TPA_inf: dof protein [Cajanus cajan]
Aradu.98HXZ	1677	758.77	502.83	1.3468	6.99813e-62	Up	NA	NA	NA	K16280//E3 ubiquitin-protein ligase RGLG [EC:2.3.2.27]	gi|922339857|ref|XP_003624273.2|//copine protein, putative [Medicago truncatula];gi|922339859|ref|XP_003624275.2|//transmembrane protein, putative [Medicago truncatula]
Aradu.99532	1345	176.64	733.71	-1.30119	2.06659e-34	Down	NA	GO:0005488//binding	NA	K04733//interleukin-1 receptor-associated kinase 4 [EC:2.7.11.1];K12126//phytochrome-interacting factor 3	gi|955377778|ref|XP_014624838.1|//PREDICTED: transcription factor ALC-like isoform X3 [Glycine max];gi|571508304|ref|XP_006595974.1|//PREDICTED: transcription factor ALC-like isoform X1 [Glycine max]
Aradu.99AQ5	2155	170.65	668.43	-1.21653	1.6252e-28	Down	GO:0016020//membrane	GO:0016491//oxidoreductase activity	GO:0044710//single-organism metabolic process	K10526//OPC-8:0 CoA ligase 1 [EC:6.2.1.-]	gi|357463591|ref|XP_003602077.1|//4-coumarate:CoA ligase-like protein [Medicago truncatula]
Aradu.99F66	1575	269.08	1336.86	-1.55953	4.37715e-80	Down	NA	GO:0016702//oxidoreductase activity, acting on single donors with incorporation of molecular oxygen, incorporation of two atoms of oxygen	GO:0018171//peptidyl-cysteine oxidation;GO:0070483//detection of hypoxia;GO:0009061//anaerobic respiration	K10712//cysteamine dioxygenase [EC:1.13.11.19]	gi|357508797|ref|XP_003624687.1|//2-aminoethanethiol dioxygenase-like protein [Medicago truncatula]
Aradu.99PKX	1980	2.58	319.78	-6.20036	5.15876e-61	Down	NA	NA	NA	K17604//zinc finger SWIM domain-containing protein 3	gi|947084696|gb|KRH33417.1|//hypothetical protein GLYMA_10G121700 [Glycine max];gi|571490959|ref|XP_006591712.1|//PREDICTED: protein FAR1-RELATED SEQUENCE 5-like [Glycine max]
Aradu.9A5NS	902	1	261	-7.2747	1.32774e-47	Down	NA	NA	NA	NA	NA
Aradu.9B4VR	2059	153.75	0	9.01765	5.65885e-40	Up	NA	NA	NA	K15449//tRNA wybutosine-synthesizing protein 1 [EC:4.1.3.44]	gi|694378684|ref|XP_009365568.1|//PREDICTED: S-adenosyl-L-methionine-dependent tRNA 4-demethylwyosine synthase-like [Pyrus x bretschneideri]
Aradu.9C9ZX	1111	481.01	98.93	3.03479	1.03632e-109	Up	NA	GO:0046872//metal ion binding;GO:0048029//monosaccharide binding;GO:0005537//mannose binding;GO:0044373//cytokinin binding	GO:0045892//negative regulation of transcription, DNA-templated;GO:0016337//single organismal cell-cell adhesion;GO:0080037//negative regulation of cytokinin-activated signaling pathway;GO:0045840//positive regulation of mitotic nuclear division	K04733//interleukin-1 receptor-associated kinase 4 [EC:2.7.11.1]	gi|4033446|sp|Q39529.1|LEC2_CLAKE//RecName: Full=Agglutinin-2; AltName: Full=Agglutinin II; AltName: Full=ClAII; AltName: Full=LecClAII; Flags: Precursor;gi|951118|gb|AAA74576.1|//mannose/glucose-binding lectin precursor, partial [Arachis hypogaea]
Aradu.9F14F	805	67	1	6.8193	4.12184e-22	Up	NA	NA	NA	NA	NA
Aradu.9F1DZ	1255	727.04	3408.11	-1.47566	4.05624e-186	Down	GO:0005783//endoplasmic reticulum;GO:0031090//organelle membrane;GO:0016021//integral component of membrane	GO:0020037//heme binding;GO:0016853//isomerase activity;GO:0005506//iron ion binding;GO:0033770//2-hydroxyisoflavanone synthase activity	GO:0009717//isoflavonoid biosynthetic process;GO:0055114//oxidation-reduction process	K13257//2-hydroxyisoflavanone synthase [EC:1.14.13.136];K07408//cytochrome P450 family 1 subfamily A polypeptide 1 [EC:1.14.14.1]	gi|920687607|gb|KOM31590.1|//hypothetical protein LR48_Vigan01g114500 [Vigna angularis]
Aradu.9F1L9	2396	97.11	443.02	-1.43647	1.1696e-24	Down	NA	NA	NA	K17710//pentatricopeptide repeat domain-containing protein 1	gi|356513139|ref|XP_003525271.1|//PREDICTED: pentatricopeptide repeat-containing protein At5g21222-like isoform X1 [Glycine max]
Aradu.9F431	2166	11	5246.82	-8.14459	0	Down	NA	NA	NA	K16277//E3 ubiquitin-protein ligase DRIP [EC:2.3.2.27];K02985//small subunit ribosomal protein S3e	gi|502141671|ref|XP_004504586.1|//PREDICTED: uncharacterized protein LOC101514379 [Cicer arietinum];gi|574139415|emb|CCW28820.1|//putative protein contains domain DUF581 [Arachis hypogaea]
Aradu.9FN01	563	51.77	311.27	-1.83477	1.26916e-24	Down	NA	NA	NA	K12890//splicing factor, arginine/serine-rich 1	gi|950952171|ref|XP_014495869.1|//PREDICTED: serine/arginine-rich-splicing factor SR34 isoform X2 [Vigna radiata var. radiata];gi|734425833|gb|KHN43510.1|//Pre-mRNA-splicing factor SF2 [Glycine soja]
Aradu.9G6FH	2274	707.07	228.37	2.38369	1.79918e-124	Up	GO:0016020//membrane	GO:0008324//cation transmembrane transporter activity	GO:0098655//cation transmembrane transport;GO:0006816//calcium ion transport	K07300//Ca2+:H+ antiporter	gi|300521743|gb|ADK26060.1|//Ca2+/H+-exchanging protein [Galega orientalis]
Aradu.9G825	681	639.88	459.17	1.23198	7.20676e-46	Up	NA	NA	NA	K04733//interleukin-1 receptor-associated kinase 4 [EC:2.7.11.1]	gi|502139394|ref|XP_004503751.1|//PREDICTED: protein P21-like isoform X2 [Cicer arietinum]
Aradu.9G9GJ	1057	120.82	93.35	1.12534	6.71733e-09	Up	GO:0016021//integral component of membrane;GO:0005886//plasma membrane	NA	NA	NA	gi|351723717|ref|NP_001236009.1|//CASP-like protein 1E2 [Glycine max]
Aradu.9H2L5	1102	52.25	196.03	-1.15436	6.41972e-09	Down	GO:0016021//integral component of membrane	GO:0008289//lipid binding	GO:0006869//lipid transport	NA	gi|955332931|ref|XP_014633839.1|//PREDICTED: uncharacterized protein LOC100792950 isoform X1 [Glycine max]
Aradu.9I4XH	562	818.24	407.06	1.76049	7.60562e-98	Up	NA	NA	NA	NA	gi|734416797|gb|KHN38596.1|//hypothetical protein glysoja_040150 [Glycine soja]
Aradu.9JN6B	852	128	33	2.70881	2.77428e-27	Up	GO:0016021//integral component of membrane;GO:0005739//mitochondrion	GO:0016820//hydrolase activity, acting on acid anhydrides, catalyzing transmembrane movement of substances;GO:0016491//oxidoreductase activity	GO:0044699//single-organism process;GO:0055085//transmembrane transport	K02109//F-type H+-transporting ATPase subunit b	gi|984914630|gb|AMC32743.1|//ATPase subunit 8 (mitochondrion) [Amorpha canescens]
Aradu.9Q0HP	3676	467	7541.89	-3.26023	0	Down	GO:0016021//integral component of membrane	GO:0004674//protein serine/threonine kinase activity;GO:0005524//ATP binding	GO:0006468//protein phosphorylation	K04733//interleukin-1 receptor-associated kinase 4 [EC:2.7.11.1];K17604//zinc finger SWIM domain-containing protein 3;K14811//ATP-dependent RNA helicase DBP3 [EC:3.6.4.13];K17086//transmembrane 9 superfamily member 2/4;K14808//ATP-dependent RNA helicase DDX54/DBP10 [EC:3.6.4.13]	gi|593783621|ref|XP_007154851.1|//hypothetical protein PHAVU_003G152900g [Phaseolus vulgaris];gi|502093198|ref|XP_004489869.1|//PREDICTED: uncharacterized protein LOC101510316 [Cicer arietinum];gi|951048633|ref|XP_014519757.1|//PREDICTED: uncharacterized protein LOC106776803 [Vigna radiata var. radiata]
Aradu.9Q62W	1034	152	56	2.19378	1.61566e-25	Up	NA	GO:0003677//DNA binding	NA	K09422//myb proto-oncogene protein, plant	gi|356540542|ref|XP_003538747.1|//PREDICTED: transcription factor MYB114-like [Glycine max]
Aradu.9SJ9X	624	183.76	104.85	1.5627	7.13716e-20	Up	NA	GO:0009055//electron carrier activity;GO:0051537//2 iron, 2 sulfur cluster binding;GO:0046872//metal ion binding	GO:0022900//electron transport chain	K02639//ferredoxin	gi|338173755|gb|AEI83424.1|//chloroplast ferredoxin I [Camellia sinensis]
Aradu.9SR9S	1524	1186.98	825.37	1.27739	1.68575e-88	Up	GO:0005634//nucleus	GO:0003677//DNA binding;GO:0043565//sequence-specific DNA binding;GO:0003700//transcription factor activity, sequence-specific DNA binding;GO:0044212//transcription regulatory region DNA binding	GO:0006351//transcription, DNA-templated;GO:0045893//positive regulation of transcription, DNA-templated	K09286//EREBP-like factor	gi|407317211|gb|AFU07643.1|//ethylene-responsive element binding factor 6 [Arachis hypogaea]
Aradu.9SX35	2340	28.22	480.25	-3.33579	2.7008e-71	Down	NA	NA	NA	K01897//long-chain acyl-CoA synthetase [EC:6.2.1.3];K07739//elongator complex protein 3 [EC:2.3.1.48];K10862//tyrosyl-DNA phosphodiesterase 1 [EC:3.1.4.-]	gi|344178892|dbj|BAK64102.1|//gag-pol polyprotein [Eustoma exaltatum subsp. russellianum];gi|593795402|ref|XP_007160739.1|//hypothetical protein PHAVU_001G013100g [Phaseolus vulgaris];gi|982895289|gb|AMB19005.1|//long chain acyl-CoA synthetase 4 [Arachis hypogaea]
Aradu.9T1SG	1428	13771.2	49063.3	-1.07978	0	Down	GO:0005634//nucleus;GO:0005737//cytoplasm	GO:0010427//abscisic acid binding;GO:0004864//protein phosphatase inhibitor activity;GO:0004872//receptor activity	GO:0080163//regulation of protein serine/threonine phosphatase activity;GO:0009738//abscisic acid-activated signaling pathway	NA	gi|145904610|gb|ABP97433.1|//Ara h 8 allergen isoform [Arachis hypogaea]
Aradu.9U8X7	285	37.17	138.17	-1.14103	1.10342e-06	Down	NA	NA	NA	NA	NA
Aradu.9W4JC	2521	1652.85	1242.07	1.16542	2.5744e-106	Up	GO:0016021//integral component of membrane	GO:0004674//protein serine/threonine kinase activity;GO:0005524//ATP binding	GO:0006468//protein phosphorylation	K04733//interleukin-1 receptor-associated kinase 4 [EC:2.7.11.1]	gi|571453546|ref|XP_006579547.1|//PREDICTED: LRR receptor-like serine/threonine-protein kinase FEI 2 [Glycine max]
Aradu.9Y5KL	913	80.23	683.43	-2.33737	1.98758e-70	Down	NA	NA	NA	NA	gi|922389582|ref|XP_013463214.1|//pollen Ole e I family allergen [Medicago truncatula]
Aradu.A07D4	2218	188.78	651.47	-1.03379	8.49081e-22	Down	GO:0016020//membrane;GO:0016021//integral component of membrane	GO:0008422//beta-glucosidase activity;GO:0016787//hydrolase activity	GO:1901657//glycosyl compound metabolic process;GO:0005975//carbohydrate metabolic process	K19964//hydroxyisourate hydrolase [EC:3.5.2.17]	gi|947068154|gb|KRH17297.1|//hypothetical protein GLYMA_14G211700 [Glycine max];gi|922396217|ref|XP_003591535.2|//glycoside hydrolase family 1 protein [Medicago truncatula];gi|734418242|gb|KHN39487.1|//Hydroxyisourate hydrolase [Glycine soja]
Aradu.A0MU0	1254	182.89	98.7	1.64306	3.78129e-21	Up	GO:0016021//integral component of membrane	GO:0016491//oxidoreductase activity	GO:0055114//oxidation-reduction process;GO:0006629//lipid metabolic process	K13076//Delta8-fatty-acid desaturase [EC:1.14.19.4]	gi|269854059|gb|ACZ51243.1|//sphingolipid delta-8 desaturase [Arachis hypogaea]
Aradu.A0YGD	1062	676.14	543.88	1.06724	8.93909e-39	Up	NA	NA	NA	K13081//leucoanthocyanidin reductase [EC:1.17.1.3]	gi|351726399|ref|NP_001237637.1|//isoflavone reductase homolog 2 [Glycine max]
Aradu.A1MN7	1461	121.54	95.62	1.09925	1.13344e-08	Up	GO:0016021//integral component of membrane	GO:0017176//phosphatidylinositol N-acetylglucosaminyltransferase activity	NA	K06119//sulfoquinovosyltransferase [EC:2.4.1.-];K03857//phosphatidylinositol glycan, class A [EC:2.4.1.198]	gi|593786573|ref|XP_007156327.1|//hypothetical protein PHAVU_003G277200g [Phaseolus vulgaris]
Aradu.A24RB	1375	304.99	1040.5	-1.01724	5.57758e-33	Down	GO:0005634//nucleus;GO:0005737//cytoplasm	GO:0020037//heme binding;GO:0010427//abscisic acid binding;GO:0004864//protein phosphatase inhibitor activity;GO:0004601//peroxidase activity;GO:0004872//receptor activity	GO:0080163//regulation of protein serine/threonine phosphatase activity;GO:0006979//response to oxidative stress;GO:0009738//abscisic acid-activated signaling pathway;GO:0098869//cellular oxidant detoxification;GO:0043086//negative regulation of catalytic activity;GO:0055114//oxidation-reduction process	K14496//abscisic acid receptor PYR/PYL family	gi|950987349|ref|XP_014503760.1|//PREDICTED: abscisic acid receptor PYL4-like [Vigna radiata var. radiata];gi|356501211|ref|XP_003519420.1|//PREDICTED: abscisic acid receptor PYL4-like [Glycine max]
Aradu.A3CPU	1294	56	1	6.56056	5.7588e-19	Up	GO:0016020//membrane;GO:0005634//nucleus;GO:0016442//RISC complex;GO:0005737//cytoplasm	GO:0003677//DNA binding;GO:0003723//RNA binding;GO:0005524//ATP binding;GO:0004525//ribonuclease III activity	GO:0090502//RNA phosphodiester bond hydrolysis, endonucleolytic;GO:0030422//production of siRNA involved in RNA interference	K11592//endoribonuclease Dicer [EC:3.1.26.-]	gi|734399600|gb|KHN30966.1|//Protein TAPT1 like [Glycine soja];gi|955357812|ref|XP_014621063.1|//PREDICTED: dicer-like protein 4 isoform X6 [Glycine max]
Aradu.A3D6P	819	286	0	9.91308	7.98339e-65	Up	NA	NA	NA	NA	NA
Aradu.A3K6K	3990	372.23	1591.48	-1.3429	2.80218e-76	Down	GO:0043231//intracellular membrane-bounded organelle	GO:0080043//quercetin 3-O-glucosyltransferase activity;GO:0005524//ATP binding;GO:0080044//quercetin 7-O-glucosyltransferase activity;GO:0004386//helicase activity;GO:0003676//nucleic acid binding	GO:0009813//flavonoid biosynthetic process;GO:0052696//flavonoid glucuronidation	K08236//limonoid glucosyltransferase [EC:2.4.1.210];K12811//ATP-dependent RNA helicase DDX46/PRP5 [EC:3.6.4.13];K13068//sinapate 1-glucosyltransferase [EC:2.4.1.120]	gi|558480484|gb|AHA54051.1|//UGT84A13 [Quercus robur];gi|951050574|ref|XP_014520230.1|//PREDICTED: DEAD-box ATP-dependent RNA helicase 42 [Vigna radiata var. radiata]
Aradu.A43U5	1459	144.68	98.22	1.31198	1.0763e-12	Up	GO:0016020//membrane;GO:0005615//extracellular space;GO:0005764//lysosome	GO:0004197//cysteine-type endopeptidase activity	GO:0051603//proteolysis involved in cellular protein catabolic process	K16292//KDEL-tailed cysteine endopeptidase [EC:3.4.22.-]	gi|922387962|ref|XP_013462564.1|//papain family cysteine protease [Medicago truncatula]
Aradu.A4FGM	1860	185.76	76.15	2.03973	3.02182e-28	Up	NA	NA	NA	K06911//uncharacterized protein;K10278//F-box and leucine-rich repeat protein 12	gi|734339564|gb|KHN08979.1|//F-box/FBD/LRR-repeat protein [Glycine soja]
Aradu.A5Z1R	2070	1012.94	781.82	1.12685	2.13522e-62	Up	GO:0005634//nucleus;GO:0005739//mitochondrion	GO:0003723//RNA binding;GO:0004809//tRNA (guanine-N2-)-methyltransferase activity	GO:0002940//tRNA N2-guanine methylation	K00555//tRNA (guanine26-N2/guanine27-N2)-dimethyltransferase [EC:2.1.1.215 2.1.1.216]	gi|502148857|ref|XP_004507297.1|//PREDICTED: probable tRNA (guanine(26)-N(2))-dimethyltransferase 1 isoform X3 [Cicer arietinum]
Aradu.A6TG7	826	44	8	3.21264	4.48815e-12	Up	GO:0016020//membrane	NA	NA	NA	gi|502112338|ref|XP_004494298.1|//PREDICTED: uncharacterized protein At3g58460 [Cicer arietinum]
Aradu.A78TV	811	14	140	-2.56872	2.33628e-17	Down	GO:0005874//microtubule;GO:0005819//spindle	NA	GO:0060236//regulation of mitotic spindle organization;GO:0032147//activation of protein kinase activity	K16812//targeting protein for Xklp2	gi|571462533|ref|XP_006582312.1|//PREDICTED: protein TPX2-like isoform X2 [Glycine max]
Aradu.A9IQR	1843	223.75	82.1	2.19964	6.74035e-37	Up	NA	NA	NA	NA	gi|593798850|ref|XP_007162463.1|//hypothetical protein PHAVU_001G154400g [Phaseolus vulgaris]
Aradu.AAH6J	3206	168.67	787.05	-1.46905	6.52899e-44	Down	GO:0016021//integral component of membrane	GO:0005524//ATP binding;GO:0004672//protein kinase activity	GO:0006468//protein phosphorylation	K04733//interleukin-1 receptor-associated kinase 4 [EC:2.7.11.1]	gi|356571765|ref|XP_003554043.1|//PREDICTED: probable inactive leucine-rich repeat receptor-like protein kinase At3g03770 [Glycine max]
Aradu.ADJ2V	1105	155	1401	-2.42291	7.86037e-149	Down	NA	NA	NA	K03469//ribonuclease HI [EC:3.1.26.4]	NA
Aradu.AF8HB	2259	597.06	318.48	1.65988	3.06076e-66	Up	GO:0005874//microtubule;GO:0005871//kinesin complex	GO:0005524//ATP binding;GO:0008017//microtubule binding;GO:0008574//ATP-dependent microtubule motor activity, plus-end-directed	GO:0007018//microtubule-based movement;GO:0008104//protein localization;GO:0030705//cytoskeleton-dependent intracellular transport	K10396//kinesin family member 5	gi|922355388|ref|XP_003611213.2|//armadillo repeat kinesin-like protein [Medicago truncatula];gi|571487021|ref|XP_006590542.1|//PREDICTED: armadillo repeat-containing kinesin-like protein 3 isoform X4 [Glycine max]
Aradu.AF9V9	441	438.18	318.45	1.21366	3.18049e-31	Up	NA	GO:0016740//transferase activity;GO:0005488//binding	GO:0044699//single-organism process;GO:0006355//regulation of transcription, DNA-templated	NA	gi|351721812|ref|NP_001237222.1|//bZIP transcription factor bZIP41 [Glycine max]
Aradu.AFL9R	553	31	128	-1.2926	2.50985e-07	Down	NA	NA	NA	NA	gi|922356986|ref|XP_003616146.2|//hypothetical protein MTR_5g076600 [Medicago truncatula]
Aradu.AG5I3	3309	1508.34	1034.47	1.29728	1.00323e-114	Up	GO:0016021//integral component of membrane;GO:0005886//plasma membrane	GO:0004674//protein serine/threonine kinase activity;GO:0005524//ATP binding	GO:0016310//phosphorylation;GO:0006468//protein phosphorylation	K04733//interleukin-1 receptor-associated kinase 4 [EC:2.7.11.1]	gi|922392260|ref|XP_013464540.1|//cysteine-rich RLK (receptor-like kinase) protein [Medicago truncatula];gi|734370870|gb|KHN19486.1|//Putative leucine-rich repeat receptor-like serine/threonine-protein kinase [Glycine soja];gi|828292487|ref|XP_012567979.1|//PREDICTED: probable leucine-rich repeat receptor-like serine/threonine-protein kinase At3g14840 [Cicer arietinum]
Aradu.AH39E	4036	605.36	303.04	1.75149	2.72945e-72	Up	GO:0043226//organelle;GO:0044464//cell part;GO:0016021//integral component of membrane	GO:0005524//ATP binding;GO:0004672//protein kinase activity	GO:0006810//transport;GO:0006952//defense response;GO:0006468//protein phosphorylation;GO:0009617//response to bacterium	K13420//LRR receptor-like serine/threonine-protein kinase FLS2 [EC:2.7.11.1]	gi|356528114|ref|XP_003532650.1|//PREDICTED: LRR receptor-like serine/threonine-protein kinase FLS2 [Glycine max]
Aradu.AHY1U	733	76	1	7.00113	1.27345e-24	Up	NA	NA	NA	K15289//solute carrier family 35, member F5;K01599//uroporphyrinogen decarboxylase [EC:4.1.1.37]	NA
Aradu.AI61T	1584	171.36	136.23	1.08419	2.5538e-11	Up	NA	NA	NA	K01889//phenylalanyl-tRNA synthetase alpha chain [EC:6.1.1.20];K17535//serine/threonine-protein kinase TNNI3K [EC:2.7.11.1];K11649//SWI/SNF related-matrix-associated actin-dependent regulator of chromatin subfamily C;K15030//translation initiation factor 3 subunit M;K08955//ATP-dependent metalloprotease [EC:3.4.24.-]	gi|356518621|ref|XP_003527977.1|//PREDICTED: F-box/kelch-repeat protein At3g06240-like [Glycine max];gi|356525096|ref|XP_003531163.1|//PREDICTED: F-box/kelch-repeat protein At3g06240-like [Glycine max]
Aradu.AI6A0	652	937.89	778.94	1.02111	1.49355e-49	Up	GO:0016021//integral component of membrane;GO:0022625//cytosolic large ribosomal subunit	GO:0003735//structural constituent of ribosome	GO:0006412//translation	K02921//large subunit ribosomal protein L37Ae	gi|565475298|ref|XP_006295290.1|//hypothetical protein CARUB_v10024379mg, partial [Capsella rubella]
Aradu.AIW9R	2465	335.31	233.68	1.27417	4.44216e-26	Up	NA	NA	NA	K06670//cohesin complex subunit SCC1	gi|950984184|ref|XP_014502985.1|//PREDICTED: sister chromatid cohesion 1 protein 1 [Vigna radiata var. radiata]
Aradu.AK8HB	717	5024	3362	1.33272	0	Up	GO:0016020//membrane	NA	NA	NA	gi|502155870|ref|XP_004510221.1|//PREDICTED: auxin-induced in root cultures protein 12 [Cicer arietinum]
Aradu.AKR7M	504	1611.54	1210.71	1.16579	9.50406e-104	Up	NA	NA	NA	K13449//pathogenesis-related protein 1;K20412//peptidase inhibitor 16	gi|357483161|ref|XP_003611867.1|//CAP, cysteine-rich secretory protein, antigen 5 [Medicago truncatula]
Aradu.ALM1L	2105	287.96	186.7	1.37835	2.49199e-25	Up	GO:0016021//integral component of membrane	GO:0008375//acetylglucosaminyltransferase activity	NA	NA	gi|734330463|gb|KHN06677.1|//hypothetical protein glysoja_021223 [Glycine soja]
Aradu.ALT43	1690	208.67	173.25	1.02157	2.4837e-12	Up	GO:0005618//cell wall;GO:0009506//plasmodesma;GO:0046658//anchored component of plasma membrane	GO:0004553//hydrolase activity, hydrolyzing O-glycosyl compounds;GO:0030247//polysaccharide binding	GO:0005975//carbohydrate metabolic process	K19891//glucan endo-1,3-beta-glucosidase 1/2/3 [EC:3.2.1.39]	gi|502182642|ref|XP_004516968.1|//PREDICTED: glucan endo-1,3-beta-glucosidase [Cicer arietinum]
Aradu.ANI3L	1157	210.87	83.05	2.09751	6.08281e-33	Up	NA	NA	NA	K14484//auxin-responsive protein IAA	gi|593700321|ref|XP_007150599.1|//hypothetical protein PHAVU_005G165600g [Phaseolus vulgaris];gi|590619517|ref|XP_007024319.1|//Phytochrome-associated protein 1, putative [Theobroma cacao]
Aradu.ANI5N	1948	377.19	117.05	2.44137	5.60023e-69	Up	GO:0009941//chloroplast envelope;GO:0009534//chloroplast thylakoid	GO:0016630//protochlorophyllide reductase activity	GO:0055114//oxidation-reduction process;GO:0015979//photosynthesis;GO:0015995//chlorophyll biosynthetic process	K00218//protochlorophyllide reductase [EC:1.3.1.33]	gi|802716205|ref|XP_012084920.1|//PREDICTED: protochlorophyllide reductase, chloroplastic [Jatropha curcas]
Aradu.AP7MY	787	300.51	246.67	1.03804	2.0024e-17	Up	GO:0016021//integral component of membrane	GO:0008270//zinc ion binding	NA	K19041//E3 ubiquitin-protein ligase RNF38/44 [EC:2.3.2.27]	gi|593534258|ref|XP_007142271.1|//hypothetical protein PHAVU_008G266700g [Phaseolus vulgaris]
Aradu.AQR2G	1653	2	247	-6.19516	1.68789e-47	Down	GO:0043231//intracellular membrane-bounded organelle;GO:0016020//membrane;GO:0031902//late endosome membrane;GO:0005829//cytosol;GO:0005794//Golgi apparatus;GO:0016021//integral component of membrane;GO:0031201//SNARE complex;GO:0005789//endoplasmic reticulum membrane;GO:0012507//ER to Golgi transport vesicle membrane;GO:0044444//cytoplasmic part	GO:0005484//SNAP receptor activity;GO:0000149//SNARE binding	GO:0006896//Golgi to vacuole transport;GO:0048280//vesicle fusion with Golgi apparatus;GO:0006623//protein targeting to vacuole;GO:0042147//retrograde transport, endosome to Golgi;GO:0006888//ER to Golgi vesicle-mediated transport;GO:0006891//intra-Golgi vesicle-mediated transport	K08496//golgi SNAP receptor complex member 2;K19882//O-palmitoleoyl-L-serine hydrolase [EC:3.1.1.98]	gi|502098641|ref|XP_004491283.1|//PREDICTED: membrin-11-like [Cicer arietinum];gi|502153960|ref|XP_004509522.1|//PREDICTED: pectin acetylesterase 8-like [Cicer arietinum];gi|947109293|gb|KRH57619.1|//hypothetical protein GLYMA_05G072900 [Glycine max]
Aradu.AR3UR	1383	4125.01	15234.8	-1.13169	0	Down	GO:0005768//endosome;GO:0016021//integral component of membrane;GO:0005802//trans-Golgi network	GO:0016857//racemase and epimerase activity, acting on carbohydrates and derivatives;GO:0050662//coenzyme binding	GO:0005975//carbohydrate metabolic process	K08679//UDP-glucuronate 4-epimerase [EC:5.1.3.6]	gi|502135150|ref|XP_004502237.1|//PREDICTED: UDP-glucuronate 4-epimerase 6 [Cicer arietinum]
Aradu.ASL4K	1201	24	274	-2.75986	7.56604e-35	Down	GO:0005886//plasma membrane	GO:0004144//diacylglycerol O-acyltransferase activity;GO:0047196//long-chain-alcohol O-fatty-acyltransferase activity	GO:0019432//triglyceride biosynthetic process	K20098//DNA excision repair protein ERCC-6-like 2 [EC:3.6.4.-]	gi|356567032|ref|XP_003551727.1|//PREDICTED: O-acyltransferase WSD1-like [Glycine max]
Aradu.AT7EY	882	14.3	375.77	-3.96256	1.58073e-63	Down	GO:0005747//mitochondrial respiratory chain complex I	NA	NA	K03946//NADH dehydrogenase (ubiquinone) 1 alpha subcomplex subunit 2	gi|734370579|gb|KHN19337.1|//NADH dehydrogenase [ubiquinone] 1 alpha subcomplex subunit 2 [Glycine soja]
Aradu.AU74Y	1938	1182.84	986.03	1.01576	1.49228e-61	Up	NA	NA	NA	K07195//exocyst complex component 7	gi|356541262|ref|XP_003539098.1|//PREDICTED: exocyst complex component EXO70B1-like [Glycine max]
Aradu.AW2UH	2275	260.37	167.63	1.38849	2.65979e-23	Up	GO:0005887//integral component of plasma membrane	GO:0005355//glucose transmembrane transporter activity;GO:0005351//sugar:proton symporter activity	GO:0046323//glucose import;GO:0015992//proton transport;GO:1904659//glucose transmembrane transport	K08150//MFS transporter, SP family, solute carrier family 2 (myo-inositol transporter), member 13	gi|955352784|ref|XP_003541068.2|//PREDICTED: polyol transporter 5-like [Glycine max]
Aradu.AW4VB	768	209.89	765.87	-1.11426	2.09425e-28	Down	NA	NA	NA	NA	gi|351727168|ref|NP_001238687.1|//uncharacterized protein LOC100527099 [Glycine max]
Aradu.AY0CP	829	40.21	234.88	-1.79309	1.8936e-18	Down	NA	GO:0031177//phosphopantetheine binding;GO:0016491//oxidoreductase activity	GO:0006633//fatty acid biosynthetic process;GO:0055114//oxidation-reduction process	K03955//NADH dehydrogenase (ubiquinone) 1 alpha/beta subcomplex 1	gi|284808851|gb|ADB94673.1|//acyl carrier protein 4 [Arachis hypogaea]
Aradu.AYN79	829	9.39	138.11	-3.12534	1.46671e-20	Down	NA	NA	NA	K01256//aminopeptidase N [EC:3.4.11.2];K08956//AFG3 family protein [EC:3.4.24.-]	gi|388505220|gb|AFK40676.1|//unknown [Lotus japonicus]
Aradu.B0BG6	1416	192.19	864.13	-1.41551	1.54587e-45	Down	NA	GO:0051082//unfolded protein binding	GO:0006457//protein folding	K09510//DnaJ homolog subfamily B member 4	gi|356517478|ref|XP_003527414.1|//PREDICTED: dnaJ protein homolog 1-like [Glycine max];gi|950936639|ref|XP_014519202.1|//PREDICTED: dnaJ protein homolog 1-like [Vigna radiata var. radiata]
Aradu.B16HX	1532	431.37	309.31	1.23308	1.67947e-31	Up	NA	NA	NA	K11426//SET and MYND domain-containing protein	gi|356498081|ref|XP_003517882.1|//PREDICTED: uncharacterized protein LOC100778421 [Glycine max];gi|734404257|gb|KHN32908.1|//hypothetical protein glysoja_037079 [Glycine soja]
Aradu.B1CT2	852	1869.52	781.81	2.01098	7.1626e-265	Up	GO:0005829//cytosol;GO:0009570//chloroplast stroma	GO:0016491//oxidoreductase activity	GO:0009228//thiamine biosynthetic process;GO:0052837//thiazole biosynthetic process;GO:0006950//response to stress;GO:0055114//oxidation-reduction process	K03146//thiamine thiazole synthase	gi|951072791|ref|XP_014491873.1|//PREDICTED: thiamine thiazole synthase 2, chloroplastic-like [Vigna radiata var. radiata]
Aradu.B1RW3	2276	0	741	-9.78012	1.15128e-100	Down	NA	NA	NA	K09519//DnaJ homolog subfamily B member 13	gi|357471053|ref|XP_003605811.1|//Ulp1 protease family, carboxy-terminal domain protein [Medicago truncatula]
Aradu.B2QV1	3252	11.01	2013.52	-6.76155	0	Down	NA	GO:0008017//microtubule binding	GO:0007010//cytoskeleton organization	K03029//26S proteasome regulatory subunit N10	gi|502149624|ref|XP_004507603.1|//PREDICTED: microtubule-associated protein 70-5-like [Cicer arietinum]
Aradu.B48EE	978	976.91	554.7	1.56972	3.3632e-99	Up	NA	NA	NA	NA	gi|922359286|ref|XP_013453607.1|//hypothetical protein MTR_5g024973 [Medicago truncatula]
Aradu.B4D3A	2088	403	226	1.58766	1.54592e-42	Up	GO:0005634//nucleus;GO:0005737//cytoplasm	NA	NA	K08332	gi|734312171|gb|KHN00349.1|//U-box domain-containing protein 19 [Glycine soja]
Aradu.B5TNQ	327	533.86	302.18	1.57426	3.71745e-55	Up	NA	NA	NA	K03676//glutaredoxin 3	gi|951042039|ref|XP_014518075.1|//PREDICTED: glutaredoxin-C9 [Vigna radiata var. radiata]
Aradu.B6CZV	1566	1957.87	902.54	1.87043	5.2262e-252	Up	GO:0005794//Golgi apparatus	GO:0016413//O-acetyltransferase activity	GO:0071554//cell wall organization or biogenesis	K16573//gamma-tubulin complex component 6	gi|734354460|gb|KHN13696.1|//hypothetical protein glysoja_034006 [Glycine soja]
Aradu.B6TXL	612	62	336	-1.68491	1.12221e-23	Down	NA	NA	NA	NA	NA
Aradu.B6W9G	1224	51.64	702.48	-3.01269	1.28841e-94	Down	GO:0005774//vacuolar membrane;GO:0016020//membrane;GO:0016021//integral component of membrane	GO:0015184//L-cystine transmembrane transporter activity	GO:0015811//L-cystine transport	K12386//cystinosin	gi|743935173|ref|XP_011011947.1|//PREDICTED: cystinosin homolog isoform X1 [Populus euphratica];gi|922351043|ref|XP_013451347.1|//cystinosin-like protein [Medicago truncatula]
Aradu.B6WCM	2356	1	1324.67	-9.61821	7.62106e-183	Down	GO:0005655//nucleolar ribonuclease P complex	GO:0004526//ribonuclease P activity	GO:0090502//RNA phosphodiester bond hydrolysis, endonucleolytic	NA	gi|571542880|ref|XP_006602003.1|//PREDICTED: factor of DNA methylation 2-like [Glycine max]
Aradu.B6WV3	435	21.61	76.61	-1.07263	0.000356513	Down	NA	NA	NA	NA	NA
Aradu.B74ZD	1454	196	137	1.26988	7.32757e-16	Up	NA	NA	NA	NA	gi|920689722|gb|KOM33705.1|//hypothetical protein LR48_Vigan01g326100 [Vigna angularis]
Aradu.B8D8W	2465	111.8	624.79	-1.72924	3.97756e-44	Down	GO:0016021//integral component of membrane	GO:0000250//lanosterol synthase activity	NA	K01853//cycloartenol synthase [EC:5.4.99.8]	gi|108743267|dbj|BAE95409.1|//oxidosqualene cyclase [Lotus japonicus]
Aradu.B8GCY	1840	1559.78	920.05	1.51477	1.55404e-149	Up	NA	GO:0004014//adenosylmethionine decarboxylase activity	GO:0006597//spermine biosynthetic process;GO:0006557//S-adenosylmethioninamine biosynthetic process;GO:0008295//spermidine biosynthetic process	K01611//S-adenosylmethionine decarboxylase [EC:4.1.1.50]	gi|828297117|ref|XP_012568778.1|//PREDICTED: S-adenosylmethionine decarboxylase proenzyme-like isoform X3 [Cicer arietinum];gi|734354909|gb|KHN13794.1|//S-adenosylmethionine decarboxylase proenzyme [Glycine soja]
Aradu.B8PKQ	1912	2	125	-5.21258	9.59248e-25	Down	NA	NA	NA	K07300//Ca2+:H+ antiporter	gi|697126427|ref|XP_009617248.1|//PREDICTED: uncharacterized protein LOC104109606 [Nicotiana tomentosiformis]
Aradu.B8U65	2198	131.14	586.84	-1.40865	3.08679e-31	Down	GO:0016021//integral component of membrane	GO:0015105//arsenite transmembrane transporter activity	GO:0055085//transmembrane transport;GO:0015700//arsenite transport;GO:0098656//anion transmembrane transport	K14430//phosphate transporter	gi|502163371|ref|XP_004512819.1|//PREDICTED: putative transporter arsB [Cicer arietinum]
Aradu.B9QGP	2724	252.63	1071.14	-1.33084	3.58128e-51	Down	NA	NA	NA	K09060//plant G-box-binding factor	gi|571558875|ref|XP_006604634.1|//PREDICTED: uncharacterized protein LOC100788624 isoform X2 [Glycine max];gi|955312750|ref|XP_014629391.1|//PREDICTED: uncharacterized protein LOC778152 isoform X1 [Glycine max]
Aradu.BA5XE	1305	90	543.99	-1.84238	5.09068e-42	Down	GO:0016020//membrane	NA	NA	NA	gi|734386127|gb|KHN24847.1|//Desiccation-related protein PCC13-62 [Glycine soja]
Aradu.BB4JP	1728	1144.44	746.59	1.36946	7.05647e-95	Up	NA	NA	NA	K13425//WRKY transcription factor 22	gi|571541254|ref|XP_006601715.1|//PREDICTED: transcription factor isoform X1 [Glycine max]
Aradu.BC06J	1944	232.99	821.92	-1.06552	2.35793e-28	Down	GO:0005669//transcription factor TFIID complex	GO:0046982//protein heterodimerization activity	GO:0006352//DNA-templated transcription, initiation	K03129//transcription initiation factor TFIID subunit 4	gi|734376681|gb|KHN21410.1|//Transcription initiation factor TFIID subunit 4 [Glycine soja]
Aradu.BC114	1843	878.65	80.75	4.19696	3.11566e-254	Up	GO:0005618//cell wall;GO:0005773//vacuole	GO:0030246//carbohydrate binding;GO:0004565//beta-galactosidase activity	GO:0005975//carbohydrate metabolic process	K12309//beta-galactosidase [EC:3.2.1.23]	gi|475469968|gb|EMT02336.1|//Beta-galactosidase 2 [Aegilops tauschii];gi|51507377|emb|CAH18936.1|//beta-galactosidase [Pyrus communis]
Aradu.BD7BL	1758	104.4	1	7.45918	3.32014e-32	Up	GO:0005634//nucleus;GO:0000932//P-body;GO:0030015//CCR4-NOT core complex	NA	GO:0017148//negative regulation of translation;GO:0006355//regulation of transcription, DNA-templated;GO:0000288//nuclear-transcribed mRNA catabolic process, deadenylation-dependent decay	K12605//CCR4-NOT transcription complex subunit 2	gi|920708765|gb|KOM50762.1|//hypothetical protein LR48_Vigan08g158900 [Vigna angularis];gi|743938841|ref|XP_011013859.1|//PREDICTED: probable NOT transcription complex subunit VIP2 [Populus euphratica]
Aradu.BDU45	509	30	114	-1.17279	5.43371e-06	Down	NA	NA	NA	NA	gi|734390929|gb|KHN27004.1|//hypothetical protein glysoja_040812 [Glycine soja]
Aradu.BEE8W	822	953	688	1.22327	8.61812e-67	Up	NA	NA	NA	NA	gi|571433220|ref|XP_006572801.1|//PREDICTED: uncharacterized protein LOC100305891 isoform X1 [Glycine max]
Aradu.BFJ1U	448	439	164	2.17373	8.2211e-70	Up	NA	NA	NA	NA	gi|947096157|gb|KRH44742.1|//hypothetical protein GLYMA_08G228400 [Glycine max]
Aradu.BG2Q4	1268	280.03	82.37	2.5186	1.95521e-53	Up	GO:0009505//plant-type cell wall;GO:0005576//extracellular region	GO:0020037//heme binding;GO:0046872//metal ion binding;GO:0004601//peroxidase activity	GO:0006979//response to oxidative stress;GO:0009664//plant-type cell wall organization;GO:0098869//cellular oxidant detoxification;GO:0042744//hydrogen peroxide catabolic process;GO:0055114//oxidation-reduction process	K00430//peroxidase [EC:1.11.1.7]	gi|1232069|gb|AAB67737.1|//cationic peroxidase [Stylosanthes humilis]
Aradu.BI5JF	1096	10710.1	8	11.1399	0	Up	GO:0044432//endoplasmic reticulum part;GO:0044425//membrane part	NA	NA	K20721//reticulon-1;K20723//reticulon-3	gi|351724107|ref|NP_001237302.1|//24 kDa seed maturation protein [Glycine max]
Aradu.BJ4QR	2081	555.31	1957.9	-1.06474	3.37309e-65	Down	NA	GO:0008270//zinc ion binding;GO:0016874//ligase activity	NA	K16280//E3 ubiquitin-protein ligase RGLG [EC:2.3.2.27]	gi|920699547|gb|KOM42772.1|//hypothetical protein LR48_Vigan05g037600 [Vigna angularis];gi|947095076|gb|KRH43661.1|//hypothetical protein GLYMA_08G1630001, partial [Glycine max];gi|922391527|ref|XP_013464177.1|//E3 ubiquitin-protein ligase RGLG2-like protein [Medicago truncatula];gi|356528633|ref|XP_003532904.1|//PREDICTED: E3 ubiquitin-protein ligase RGLG2-like [Glycine max]
Aradu.BK9AL	1727	992.48	3405.98	-1.02575	1.07842e-105	Down	NA	GO:0046872//metal ion binding;GO:0005506//iron ion binding;GO:0051213//dioxygenase activity	GO:0055114//oxidation-reduction process	K06892//feruloyl-CoA ortho-hydroxylase [EC:1.14.11.-];K13229//2,4-dihydroxy-1,4-benzoxazin-3-one-glucoside dioxygenase [EC:1.14.20.2]	gi|388500052|gb|AFK38092.1|//unknown [Lotus japonicus]
Aradu.BP38Y	2003	75	391.44	-1.63062	3.86147e-26	Down	NA	GO:0008422//beta-glucosidase activity	GO:1901657//glycosyl compound metabolic process;GO:0005975//carbohydrate metabolic process	K01188//beta-glucosidase [EC:3.2.1.21]	gi|357468871|ref|XP_003604720.1|//glycoside hydrolase family 1 protein [Medicago truncatula]
Aradu.BPZ0W	1632	5	178	-4.4006	1.06112e-32	Down	GO:0005737//cytoplasm	GO:0004596//peptide alpha-N-acetyltransferase activity	GO:0017196//N-terminal peptidyl-methionine acetylation	K20792//N-alpha-acetyltransferase 15/16, NatA auxiliary subunit	gi|6730746|gb|AAF27136.1|AC018849_24//putative N-terminal acetyltransferase; 84330-89402 [Arabidopsis thaliana];gi|734313470|gb|KHN01367.1|//N-alpha-acetyltransferase 16, NatA auxiliary subunit [Glycine soja];gi|920680469|gb|KOM27334.1|//hypothetical protein LR48_Vigan406s014400 [Vigna angularis]
Aradu.BS04E	1013	119.67	83.81	1.26707	2.61336e-10	Up	GO:0005634//nucleus;GO:0005694//chromosome;GO:0000775//chromosome, centromeric region;GO:0000786//nucleosome	GO:0003677//DNA binding;GO:0046982//protein heterodimerization activity;GO:0005488//binding	GO:0051301//cell division;GO:0051307//meiotic chromosome separation	K11253//histone H3	gi|593266110|ref|XP_007135233.1|//hypothetical protein PHAVU_010G112000g [Phaseolus vulgaris];gi|365799495|dbj|BAL42672.1|//centromere specific histone H3 variant [Astragalus sinicus]
Aradu.BT2CM	927	86	61	1.24873	9.66314e-08	Up	NA	NA	NA	NA	NA
Aradu.BT8WT	682	45.8	18.86	2.03322	3.35402e-08	Up	NA	NA	NA	NA	NA
Aradu.BUY04	2703	346	279.92	1.05896	2.06447e-20	Up	GO:0016021//integral component of membrane;GO:0005886//plasma membrane	GO:0005544//calcium-dependent phospholipid binding;GO:0016757//transferase activity, transferring glycosyl groups;GO:0005509//calcium ion binding	NA	K04733//interleukin-1 receptor-associated kinase 4 [EC:2.7.11.1]	gi|356563570|ref|XP_003550034.1|//PREDICTED: protein QUIRKY-like [Glycine max]
Aradu.BV2Q9	602	140.93	724.8	-1.6094	3.82571e-46	Down	GO:0016020//membrane	NA	NA	NA	gi|502151611|ref|XP_004508526.1|//PREDICTED: early nodulin-93-like [Cicer arietinum]
Aradu.BVL00	2543	1519.77	11642.5	-2.18427	0	Down	NA	NA	GO:0006351//transcription, DNA-templated	K12133//MYB-related transcription factor LHY	gi|356560061|ref|XP_003548314.1|//PREDICTED: protein REVEILLE 7 [Glycine max]
Aradu.BX0IC	507	73.03	60.7	1.02	2.1724e-05	Up	NA	NA	NA	NA	gi|502157374|ref|XP_004510853.1|//PREDICTED: BON1-associated protein 2-like [Cicer arietinum]
Aradu.BYX8Y	363	27	1	5.50809	3.8483e-10	Up	NA	NA	NA	NA	NA
Aradu.C1QBJ	1761	259.39	1005.71	-1.20181	2.64966e-41	Down	NA	NA	NA	K12741//heterogeneous nuclear ribonucleoprotein A1/A3;K06236//collagen, type I, alpha;K14491//two-component response regulator ARR-B family;K01940//argininosuccinate synthase [EC:6.3.4.5]	gi|947118798|gb|KRH67047.1|//hypothetical protein GLYMA_03G143600 [Glycine max]
Aradu.C1VYE	2882	358.97	272.83	1.14907	7.31557e-24	Up	NA	NA	NA	K20495//long-chain fatty acid omega-monooxygenase [EC:1.14.13.205]	gi|947075683|gb|KRH24523.1|//hypothetical protein GLYMA_12G046500 [Glycine max];gi|571492060|ref|XP_006592117.1|//PREDICTED: uncharacterized protein LOC100789011 isoform X1 [Glycine max]
Aradu.C2JFU	2152	3284.67	1927.27	1.5224	0	Up	GO:0009507//chloroplast	GO:0008878//glucose-1-phosphate adenylyltransferase activity;GO:0005524//ATP binding	GO:0019252//starch biosynthetic process;GO:0005978//glycogen biosynthetic process	K00975//glucose-1-phosphate adenylyltransferase [EC:2.7.7.27]	gi|356545193|ref|XP_003541029.1|//PREDICTED: glucose-1-phosphate adenylyltransferase large subunit 1-like [Glycine max]
Aradu.C2WH3	1345	257.05	0	10.233	8.47759e-56	Up	NA	NA	NA	NA	NA
Aradu.C331T	932	180.11	112.03	1.4382	1.89533e-17	Up	GO:0009506//plasmodesma;GO:0016459//myosin complex;GO:0035619//root hair tip	GO:0003774//motor activity;GO:0005488//binding	GO:0030048//actin filament-based movement;GO:0010154//fruit development;GO:0010091//trichome branching;GO:0051646//mitochondrion localization;GO:0060151//peroxisome localization;GO:0048467//gynoecium development;GO:0048768//root hair cell tip growth;GO:0051645//Golgi localization;GO:0090436//leaf pavement cell development;GO:0051301//cell division	K10357//myosin V	gi|743797690|ref|XP_010925046.1|//PREDICTED: myosin-17-like isoform X2 [Elaeis guineensis];gi|319827297|gb|ADV74832.1|//myosin XI-K headless derivative [Arabidopsis thaliana]
Aradu.C3H41	1871	69.23	311	-1.41424	1.97636e-17	Down	GO:0005622//intracellular	NA	GO:0006886//intracellular protein transport	K16803//cytoskeleton-associated protein 5	gi|502140670|ref|XP_004504295.1|//PREDICTED: two-component response regulator ARR14-like [Cicer arietinum];gi|965608017|dbj|BAT94508.1|//hypothetical protein VIGAN_08111800 [Vigna angularis var. angularis]
Aradu.C4MHC	1599	469.13	252.28	1.64817	6.99875e-52	Up	NA	NA	NA	NA	gi|356520559|ref|XP_003528929.1|//PREDICTED: probable protein ABIL5 [Glycine max]
Aradu.C70BH	1472	11041.1	1546.26	3.58924	0	Up	NA	NA	NA	NA	NA
Aradu.C7350	3673	486.13	1857.56	-1.18079	6.97007e-73	Down	GO:0045252//oxoglutarate dehydrogenase complex;GO:0005829//cytosol;GO:0005739//mitochondrion	GO:0004591//oxoglutarate dehydrogenase (succinyl-transferring) activity;GO:0030976//thiamine pyrophosphate binding	GO:0006099//tricarboxylic acid cycle	K00164//2-oxoglutarate dehydrogenase E1 component [EC:1.2.4.2]	gi|734381240|gb|KHN23142.1|//2-oxoglutarate dehydrogenase, mitochondrial [Glycine soja]
Aradu.C7AZ0	1191	1742	6111	-1.05746	5.21646e-198	Down	NA	GO:0043169//cation binding;GO:0004721//phosphoprotein phosphatase activity	NA	K14497//protein phosphatase 2C [EC:3.1.3.16]	gi|965615005|dbj|BAU00638.1|//hypothetical protein VIGAN_10224900 [Vigna angularis var. angularis]
Aradu.C8QG6	423	27.18	4	3.51768	1.32252e-08	Up	GO:0016020//membrane	NA	NA	K04567//lysyl-tRNA synthetase, class II [EC:6.1.1.6];K13466//EIX receptor 1/2;K03021//DNA-directed RNA polymerase III subunit RPC2 [EC:2.7.7.6];K19613//leucine-rich repeat protein SHOC2	gi|955383326|ref|XP_014626113.1|//PREDICTED: LRR receptor-like serine/threonine-protein kinase GSO2 [Glycine max]
Aradu.CC15G	1696	284.36	1314.29	-1.45529	2.94224e-71	Down	NA	GO:0009055//electron carrier activity;GO:0005506//iron ion binding	NA	K03686//molecular chaperone DnaJ;K05337//ferredoxin;K08244//alpha-glucan, water dikinase [EC:2.7.9.4]	gi|734413262|gb|KHN36707.1|//Chaperone protein DnaJ [Glycine soja];gi|951057266|ref|XP_014521945.1|//PREDICTED: uncharacterized protein LOC106778489 [Vigna radiata var. radiata];gi|356542195|ref|XP_003539555.1|//PREDICTED: uncharacterized protein LOC100786494 [Glycine max]
Aradu.CH4J6	492	14.27	69.16	-1.52375	1.37605e-05	Down	NA	NA	NA	K02133//F-type H+-transporting ATPase subunit beta [EC:3.6.3.14]	gi|571466041|ref|XP_006583546.1|//PREDICTED: uncharacterized protein LOC100812781 [Glycine max]
Aradu.CLF8Y	932	161	735.46	-1.43838	6.43768e-40	Down	NA	GO:0042409//caffeoyl-CoA O-methyltransferase activity	GO:0032259//methylation	K00588//caffeoyl-CoA O-methyltransferase [EC:2.1.1.104]	gi|955349443|ref|XP_014619330.1|//PREDICTED: caffeoyl-CoA O-methyltransferase 5-like isoform X1 [Glycine max]
Aradu.CM5QW	832	10918.4	1002.54	4.19824	0	Up	NA	NA	NA	NA	gi|947068890|gb|KRH17781.1|//hypothetical protein GLYMA_13G015400 [Glycine max]
Aradu.CMH7M	1663	6	1304	-7.01056	1.16523e-235	Down	GO:0016021//integral component of membrane	NA	NA	K11982//E3 ubiquitin-protein ligase RNF115/126 [EC:2.3.2.27];K15918//D-glycerate 3-kinase [EC:2.7.1.31]	gi|955376115|ref|XP_014624477.1|//PREDICTED: uncharacterized protein LOC100810148 isoform X8 [Glycine max];gi|947059528|gb|KRH08934.1|//hypothetical protein GLYMA_16G182200 [Glycine max];gi|955376111|ref|XP_014624476.1|//PREDICTED: uncharacterized protein LOC100810148 isoform X6 [Glycine max]
Aradu.CP1HR	1028	167.9	57	2.31178	9.45099e-30	Up	GO:0009536//plastid	NA	NA	K02160//acetyl-CoA carboxylase biotin carboxyl carrier protein	gi|255547536|ref|XP_002514825.1|//PREDICTED: biotin carboxyl carrier protein of acetyl-CoA carboxylase 1, chloroplastic isoform X1 [Ricinus communis]
Aradu.CPR44	1842	457760	383989	1.00673	0	Up	GO:0016020//membrane;GO:0005811//lipid particle;GO:0016021//integral component of membrane;GO:0012511//monolayer-surrounded lipid storage body	NA	NA	NA	gi|571560074|ref|XP_006604809.1|//PREDICTED: uncharacterized protein LOC100803807 isoform X2 [Glycine max];gi|571560060|ref|XP_006604805.1|//PREDICTED: uncharacterized protein LOC100803807 isoform X1 [Glycine max];gi|52001241|gb|AAU21501.1|//oleosin 3 [Arachis hypogaea]
Aradu.CQN7Q	1945	69.5	356.34	-1.60496	1.92937e-23	Down	NA	GO:0008909//isochorismate synthase activity	GO:0009058//biosynthetic process	K02552//menaquinone-specific isochorismate synthase [EC:5.4.4.2]	gi|965611215|dbj|BAT97354.1|//hypothetical protein VIGAN_09077300 [Vigna angularis var. angularis]
Aradu.CS27R	1613	298	1034.22	-1.04195	4.80475e-34	Down	GO:0016021//integral component of membrane	GO:0061630//ubiquitin protein ligase activity;GO:0008270//zinc ion binding;GO:0016874//ligase activity	GO:0043161//proteasome-mediated ubiquitin-dependent protein catabolic process;GO:0042787//protein ubiquitination involved in ubiquitin-dependent protein catabolic process;GO:0000209//protein polyubiquitination	K16283//E3 ubiquitin-protein ligase SDIR1 [EC:2.3.2.27]	gi|358249356|ref|NP_001239785.1|//uncharacterized protein LOC100805406 [Glycine max]
Aradu.CT21N	629	2581.35	9557.48	-1.1353	0	Down	NA	NA	NA	NA	NA
Aradu.CTP8M	1449	279.57	105.23	2.16287	8.92792e-45	Up	GO:0048046//apoplast;GO:0005618//cell wall	GO:0004553//hydrolase activity, hydrolyzing O-glycosyl compounds;GO:0016762//xyloglucan:xyloglucosyl transferase activity	GO:0010411//xyloglucan metabolic process;GO:0042546//cell wall biogenesis;GO:0071555//cell wall organization	K08235//xyloglucan:xyloglucosyl transferase [EC:2.4.1.207]	gi|593698936|ref|XP_007149933.1|//hypothetical protein PHAVU_005G111300g [Phaseolus vulgaris]
Aradu.CU7RX	2519	1052.25	880.94	1.00957	2.12873e-54	Up	NA	GO:0008422//beta-glucosidase activity;GO:0102483//scopolin beta-glucosidase activity	GO:0009651//response to salt stress;GO:0009725//response to hormone;GO:0019762//glucosinolate catabolic process;GO:0005975//carbohydrate metabolic process	K01188//beta-glucosidase [EC:3.2.1.21]	gi|356544198|ref|XP_003540541.1|//PREDICTED: beta-glucosidase 13-like isoform X1 [Glycine max];gi|356531818|ref|XP_003534473.1|//PREDICTED: beta-glucosidase 24-like [Glycine max];gi|955355693|ref|XP_014620609.1|//PREDICTED: beta-glucosidase 13-like isoform X2 [Glycine max]
Aradu.CUP56	703	191.96	15.94	4.34329	9.60186e-58	Up	NA	NA	NA	NA	gi|947015816|gb|KRG68574.1|//hypothetical protein GLYMA_U007300 [Glycine max];gi|947068863|gb|KRH17754.1|//hypothetical protein GLYMA_13G012900 [Glycine max]
Aradu.CVI2N	530	2	35.14	-3.38184	8.0151e-07	Down	GO:0009507//chloroplast	GO:0016798//hydrolase activity, acting on glycosyl bonds	NA	K01193//beta-fructofuranosidase [EC:3.2.1.26];K01689//enolase [EC:4.2.1.11]	gi|593611959|ref|XP_007142851.1|//hypothetical protein PHAVU_007G0220000g, partial [Phaseolus vulgaris];gi|947091317|gb|KRH39982.1|//hypothetical protein GLYMA_09G231500 [Glycine max]
Aradu.CW6UG	1141	161.29	69.27	1.97256	9.28529e-24	Up	NA	NA	NA	NA	gi|734398107|gb|KHN30438.1|//hypothetical protein glysoja_033176 [Glycine soja]
Aradu.CWE2B	645	52	248	-1.50055	2.11285e-15	Down	NA	NA	NA	K14455//aspartate aminotransferase, mitochondrial [EC:2.6.1.1]	gi|922375222|ref|XP_003600497.2|//transmembrane protein, putative [Medicago truncatula]
Aradu.CZP85	1585	1659.34	1287.57	1.11917	4.12191e-100	Up	GO:0015934//large ribosomal subunit	GO:0003735//structural constituent of ribosome	GO:0006412//translation	K02876//large subunit ribosomal protein L15	gi|388494588|gb|AFK35360.1|//unknown [Lotus japonicus]
Aradu.D03W8	2353	737.17	609.19	1.02831	9.70936e-40	Up	GO:0005634//nucleus;GO:0005886//plasma membrane;GO:0005737//cytoplasm	GO:0005524//ATP binding;GO:0004683//calmodulin-dependent protein kinase activity;GO:0005509//calcium ion binding;GO:0009931//calcium-dependent protein serine/threonine kinase activity;GO:0005516//calmodulin binding	GO:0009738//abscisic acid-activated signaling pathway;GO:0018105//peptidyl-serine phosphorylation;GO:0035556//intracellular signal transduction;GO:0046777//protein autophosphorylation	K13412//calcium-dependent protein kinase [EC:2.7.11.1]	gi|356565063|ref|XP_003550764.1|//PREDICTED: calcium-dependent protein kinase 10-like [Glycine max]
Aradu.D0CN9	1985	659.84	314.21	1.82359	4.51481e-83	Up	GO:0005576//extracellular region	GO:0016722//oxidoreductase activity, oxidizing metal ions;GO:0005507//copper ion binding	GO:0009809//lignin biosynthetic process	K05909//laccase [EC:1.10.3.2]	gi|947059171|gb|KRH08577.1|//hypothetical protein GLYMA_16G158400 [Glycine max]
Aradu.D0Z4W	1848	1241.26	741.76	1.49599	3.67268e-117	Up	NA	NA	NA	K15032//mTERF domain-containing protein, mitochondrial	gi|593330937|ref|XP_007138895.1|//hypothetical protein PHAVU_009G246600g [Phaseolus vulgaris]
Aradu.D14Q2	2183	443	282	1.40482	3.83174e-39	Up	NA	NA	NA	K04733//interleukin-1 receptor-associated kinase 4 [EC:2.7.11.1]	gi|251748500|gb|ACT11052.1|//thaumatin-like protein [Arachis diogoi]
Aradu.D1GTJ	991	146.96	106.93	1.21196	1.45796e-11	Up	NA	NA	NA	NA	gi|920694231|gb|KOM37456.1|//hypothetical protein LR48_Vigan03g083800 [Vigna angularis];gi|734380978|gb|KHN23044.1|//hypothetical protein glysoja_042060 [Glycine soja]
Aradu.D1SW4	1986	2240.57	8240.39	-1.12564	8.44782e-295	Down	GO:0016021//integral component of membrane;GO:0005778//peroxisomal membrane	GO:0008422//beta-glucosidase activity;GO:0033971//hydroxyisourate hydrolase activity	GO:0019628//urate catabolic process;GO:1901657//glycosyl compound metabolic process;GO:0006144//purine nucleobase metabolic process;GO:0005975//carbohydrate metabolic process	K19964//hydroxyisourate hydrolase [EC:3.5.2.17]	gi|593687313|ref|XP_007144316.1|//hypothetical protein PHAVU_007G145900g [Phaseolus vulgaris];gi|955305655|ref|XP_006574546.2|//PREDICTED: hydroxyisourate hydrolase isoform X1 [Glycine max];gi|965609216|dbj|BAT95707.1|//hypothetical protein VIGAN_08248000 [Vigna angularis var. angularis]
Aradu.D2U3D	1323	1879.41	7985.5	-1.3339	0	Down	NA	GO:0052887//7,9,9'-tricis-neurosporene:quinone oxidoreductase activity;GO:0052886//9,9'-dicis-carotene:quinone oxidoreductase activity;GO:0016788//hydrolase activity, acting on ester bonds	GO:0052889//9,9'-di-cis-zeta-carotene desaturation to 7,9,7',9'-tetra-cis-lycopene;GO:0055114//oxidation-reduction process	K21026//acetylajmaline esterase [EC:3.1.1.80];K00679//phospholipid:diacylglycerol acyltransferase [EC:2.3.1.158]	gi|356573291|ref|XP_003554796.1|//PREDICTED: GDSL esterase/lipase 5-like [Glycine max];gi|593266406|ref|XP_007135381.1|//hypothetical protein PHAVU_010G124800g [Phaseolus vulgaris]
Aradu.D33UF	2604	116	503.21	-1.36383	8.30518e-26	Down	GO:0016020//membrane	GO:0016301//kinase activity	GO:0016310//phosphorylation	K04733//interleukin-1 receptor-associated kinase 4 [EC:2.7.11.1]	gi|955392048|ref|XP_003555314.2|//PREDICTED: uncharacterized protein LOC100784215 [Glycine max];gi|947086899|gb|KRH35620.1|//hypothetical protein GLYMA_10G254100 [Glycine max];gi|734381334|gb|KHN23189.1|//Cysteine-rich receptor-like protein kinase 29 [Glycine soja]
Aradu.D3M3F	2052	47.94	166.87	-1.04622	6.2395e-07	Down	GO:0005576//extracellular region	GO:0016722//oxidoreductase activity, oxidizing metal ions;GO:0005507//copper ion binding	GO:0055114//oxidation-reduction process	K00423//L-ascorbate oxidase [EC:1.10.3.3]	gi|734416320|gb|KHN38199.1|//L-ascorbate oxidase [Glycine soja]
Aradu.D4A83	1178	30.11	218.85	-2.10842	4.74951e-21	Down	NA	NA	NA	K14611//solute carrier family 23 (nucleobase transporter), member 1/2;K14831//protein MAK16	gi|502146891|ref|XP_004506652.1|//PREDICTED: protein MAK16 homolog B isoform X1 [Cicer arietinum]
Aradu.D62MZ	819	169	27	3.3992	1.33708e-43	Up	NA	GO:0003725//double-stranded RNA binding	NA	NA	gi|734342136|gb|KHN09934.1|//Hypothetical protein glysoja_047183 [Glycine soja]
Aradu.D734A	1706	120.7	502.18	-1.30357	3.85345e-24	Down	GO:0005829//cytosol	GO:0004013//adenosylhomocysteinase activity	GO:0033353//S-adenosylmethionine cycle;GO:0006730//one-carbon metabolic process	K01251//adenosylhomocysteinase [EC:3.3.1.1]	gi|661885227|emb|CDP11183.1|//unnamed protein product [Coffea canephora]
Aradu.D85KR	2042	229.9	24.97	3.95595	2.15542e-65	Up	GO:0005773//vacuole	GO:0004560//alpha-L-fucosidase activity	GO:0006004//fucose metabolic process	K01206//alpha-L-fucosidase [EC:3.2.1.51]	gi|357444199|ref|XP_003592377.1|//alpha-L-fucosidase-like protein [Medicago truncatula]
Aradu.D8NAK	1376	584.26	134.01	2.87748	2.78086e-126	Up	NA	NA	NA	NA	NA
Aradu.DA9VG	826	8	401.99	-4.89781	8.61755e-75	Down	NA	NA	NA	K10706//senataxin [EC:3.6.4.-]	gi|1000978242|ref|XP_015571121.1|//PREDICTED: uncharacterized protein LOC8259952, partial [Ricinus communis];gi|763796352|gb|KJB63307.1|//hypothetical protein B456_010G141600 [Gossypium raimondii];gi|965604241|dbj|BAT91417.1|//hypothetical protein VIGAN_07001200 [Vigna angularis var. angularis];gi|950975800|ref|XP_014501162.1|//PREDICTED: helicase SEN1 isoform X2 [Vigna radiata var. radiata]
Aradu.DAK4F	1307	75.82	277.89	-1.12066	1.82807e-11	Down	GO:0005737//cytoplasm;GO:0009570//chloroplast stroma;GO:0009507//chloroplast	GO:0004364//glutathione transferase activity	GO:0006749//glutathione metabolic process;GO:0010731//protein glutathionylation	K00799//glutathione S-transferase [EC:2.5.1.18]	gi|502121562|ref|XP_004497370.1|//PREDICTED: protein IN2-1 homolog B-like [Cicer arietinum]
Aradu.DBH0W	1029	25.31	225.95	-2.40502	3.65525e-25	Down	NA	NA	NA	K17604//zinc finger SWIM domain-containing protein 3	gi|571490959|ref|XP_006591712.1|//PREDICTED: protein FAR1-RELATED SEQUENCE 5-like [Glycine max]
Aradu.DC8XI	564	38.72	27.34	1.25527	0.000203903	Up	NA	NA	NA	K04733//interleukin-1 receptor-associated kinase 4 [EC:2.7.11.1]	gi|502166484|ref|XP_004513907.1|//PREDICTED: CST complex subunit STN1 [Cicer arietinum]
Aradu.DD3VV	1608	39.69	208.8	-1.64207	7.46049e-15	Down	NA	NA	NA	K17964//leucine-rich PPR motif-containing protein, mitochondrial	gi|502118578|ref|XP_004496333.1|//PREDICTED: pentatricopeptide repeat-containing protein At2g16880 [Cicer arietinum]
Aradu.DF7HX	889	9	100	-2.72072	1.33952e-13	Down	NA	NA	NA	K20279//synaptojanin [EC:3.1.3.36]	gi|566146875|ref|XP_006368441.1|//hypothetical protein POPTR_0001s02880g [Populus trichocarpa]
Aradu.DHT3V	2554	212.25	947.12	-1.40458	3.40902e-49	Down	GO:0016021//integral component of membrane	GO:0030246//carbohydrate binding;GO:0005524//ATP binding;GO:0004672//protein kinase activity	GO:0006468//protein phosphorylation	K04733//interleukin-1 receptor-associated kinase 4 [EC:2.7.11.1]	gi|950993965|ref|XP_014505027.1|//PREDICTED: L-type lectin-domain containing receptor kinase VIII.2-like [Vigna radiata var. radiata]
Aradu.DIF7F	498	100	49	1.78235	1.29019e-13	Up	NA	NA	NA	K09597//signal peptide peptidase-like 2B [EC:3.4.23.-]	gi|356539678|ref|XP_003538322.1|//PREDICTED: uncharacterized protein LOC100810027 [Glycine max]
Aradu.DJ2MU	1391	36.98	212.49	-1.76937	1.42257e-16	Down	GO:0009705//plant-type vacuole membrane;GO:0016021//integral component of membrane	GO:0005267//potassium channel activity	GO:0071805//potassium ion transmembrane transport;GO:0006811//ion transport	K05389//potassium channel subfamily K, other eukaryote	gi|955313114|ref|XP_014629456.1|//PREDICTED: two-pore potassium channel 5-like isoform X2 [Glycine max];gi|356503966|ref|XP_003520770.1|//PREDICTED: two-pore potassium channel 5-like isoform X1 [Glycine max]
Aradu.DL7C8	1248	354.49	1384.98	-1.21284	4.67116e-57	Down	GO:0016020//membrane;GO:0016021//integral component of membrane	GO:0005215//transporter activity	GO:0006810//transport	NA	gi|950949533|ref|XP_014495182.1|//PREDICTED: probable purine permease 5 [Vigna radiata var. radiata]
Aradu.DM4CY	550	5688.39	4175.39	1.19932	0	Up	NA	NA	NA	K09510//DnaJ homolog subfamily B member 4;K09512//DnaJ homolog subfamily B member 6;K09514//DnaJ homolog subfamily B member 8	gi|950950291|ref|XP_014495360.1|//PREDICTED: dnaJ homolog subfamily B member 6 [Vigna radiata var. radiata]
Aradu.DP4NA	2170	427.77	213.67	1.75466	1.10878e-51	Up	NA	NA	NA	K20495//long-chain fatty acid omega-monooxygenase [EC:1.14.13.205];K10756//replication factor C subunit 3/5	gi|571537434|ref|XP_006600995.1|//PREDICTED: uncharacterized protein LOC100780747 isoform X1 [Glycine max]
Aradu.DQR3M	1410	247.19	860.16	-1.04578	9.36974e-29	Down	NA	NA	NA	K12581//CCR4-NOT transcription complex subunit 7/8;K03094//S-phase kinase-associated protein 1;K13126//polyadenylate-binding protein;K05941//glutathione gamma-glutamylcysteinyltransferase [EC:2.3.2.15];K01054//acylglycerol lipase [EC:3.1.1.23]	gi|593695413|ref|XP_007148205.1|//hypothetical protein PHAVU_006G188900g [Phaseolus vulgaris];gi|922369860|ref|XP_013457094.1|//NAC transcription factor-like protein [Medicago truncatula]
Aradu.DQX5V	1981	10	612	-5.18225	1.17378e-114	Down	NA	NA	NA	K05749//cytoplasmic FMR1 interacting protein	gi|947120576|gb|KRH68825.1|//hypothetical protein GLYMA_03G253000 [Glycine max];gi|947120575|gb|KRH68824.1|//hypothetical protein GLYMA_03G253000 [Glycine max];gi|955313517|ref|XP_014629528.1|//PREDICTED: protein PIR-like isoform X2 [Glycine max];gi|947120574|gb|KRH68823.1|//hypothetical protein GLYMA_03G253000 [Glycine max]
Aradu.DSK6H	669	27.94	118.57	-1.33213	3.68818e-07	Down	NA	NA	NA	NA	gi|342365835|gb|AEL30368.1|//hypothetical protein 205D04_8 [Arachis hypogaea]
Aradu.DSK8P	2135	3805.26	0	13.647	0	Up	GO:0005685//U1 snRNP;GO:0071004//U2-type prespliceosome;GO:0071011//precatalytic spliceosome;GO:0019013//viral nucleocapsid;GO:0000243//commitment complex	GO:0003729//mRNA binding;GO:0030619//U1 snRNA binding;GO:0000166//nucleotide binding	GO:0000398//mRNA splicing, via spliceosome	K11093//U1 small nuclear ribonucleoprotein 70kDa	gi|828326628|ref|XP_012573705.1|//PREDICTED: U1 small nuclear ribonucleoprotein 70 kDa [Cicer arietinum];gi|84468434|dbj|BAE71300.1|//putative U1 snRNP 70K protein [Trifolium pratense]
Aradu.DT82E	835	73	14	3.13568	1.50261e-18	Up	NA	NA	NA	NA	NA
Aradu.DT9DH	457	0	28	-5.05415	8.31876e-07	Down	NA	NA	NA	NA	NA
Aradu.DU7VI	1992	1678.63	1144.31	1.30601	8.06404e-129	Up	NA	GO:0046975//histone methyltransferase activity (H3-K36 specific);GO:0003700//transcription factor activity, sequence-specific DNA binding	GO:0042752//regulation of circadian rhythm;GO:0010452//histone H3-K36 methylation;GO:0006355//regulation of transcription, DNA-templated;GO:0070544//histone H3-K36 demethylation	K10277//lysine-specific demethylase 8 [EC:1.14.11.27]	gi|502182902|ref|XP_004517016.1|//PREDICTED: putative lysine-specific demethylase JMJD5 [Cicer arietinum];gi|356541868|ref|XP_003539394.1|//PREDICTED: putative lysine-specific demethylase JMJD5 [Glycine max];gi|734387504|gb|KHN25267.1|//Lysine-specific demethylase 8 [Glycine soja]
Aradu.DVQ9A	2149	218.02	114.21	1.68598	9.22129e-26	Up	GO:0016021//integral component of membrane	GO:0019139//cytokinin dehydrogenase activity;GO:0016614//oxidoreductase activity, acting on CH-OH group of donors;GO:0050660//flavin adenine dinucleotide binding	GO:0009690//cytokinin metabolic process;GO:0055114//oxidation-reduction process	K00279//cytokinin dehydrogenase [EC:1.5.99.12]	gi|950971785|ref|XP_014500389.1|//PREDICTED: cytokinin dehydrogenase 3-like [Vigna radiata var. radiata]
Aradu.DY5S9	305	0	13	-3.94723	0.000866883	Down	NA	NA	NA	NA	NA
Aradu.DZ5Y1	1765	2604.22	1639.27	1.421	3.2034e-226	Up	NA	NA	NA	NA	gi|922368779|ref|XP_013456554.1|//pollen protein Ole E I-like protein [Medicago truncatula]
Aradu.DZC43	982	156.96	593.56	-1.16579	5.98027e-24	Down	GO:0030126//COPI vesicle coat	NA	GO:0006810//transport;GO:0006890//retrograde vesicle-mediated transport, Golgi to ER;GO:0015031//protein transport	K20471//coatomer subunit delta	gi|734347599|gb|KHN11457.1|//Coatomer subunit delta [Glycine soja]
Aradu.E00AS	1949	215.33	927.22	-1.35316	1.26467e-45	Down	GO:0016021//integral component of membrane	NA	NA	K06689//ubiquitin-conjugating enzyme E2 D [EC:2.3.2.23];K00279//cytokinin dehydrogenase [EC:1.5.99.12];K12189//ESCRT-II complex subunit VPS25	gi|947075697|gb|KRH24537.1|//hypothetical protein GLYMA_12G047500 [Glycine max]
Aradu.E051H	894	78	54	1.28372	2.03062e-07	Up	GO:0016020//membrane	NA	NA	K10249//elongation of very long chain fatty acids protein 4 [EC:2.3.1.199]	gi|502125933|ref|XP_004499120.1|//PREDICTED: elongation of fatty acids protein 3-like [Cicer arietinum]
Aradu.E0JEI	1406	1347.38	853.88	1.41126	1.46204e-116	Up	GO:0016021//integral component of membrane	GO:0052887//7,9,9'-tricis-neurosporene:quinone oxidoreductase activity;GO:0052886//9,9'-dicis-carotene:quinone oxidoreductase activity;GO:0016788//hydrolase activity, acting on ester bonds	GO:0052889//9,9'-di-cis-zeta-carotene desaturation to 7,9,7',9'-tetra-cis-lycopene;GO:0055114//oxidation-reduction process	K21026//acetylajmaline esterase [EC:3.1.1.80];K01188//beta-glucosidase [EC:3.2.1.21];K00679//phospholipid:diacylglycerol acyltransferase [EC:2.3.1.158];K10960//geranylgeranyl diphosphate/geranylgeranyl-bacteriochlorophyllide a reductase [EC:1.3.1.83 1.3.1.111]	gi|356558457|ref|XP_003547523.1|//PREDICTED: GDSL esterase/lipase 5-like [Glycine max];gi|734438316|gb|KHN49084.1|//GDSL esterase/lipase 5 [Glycine soja]
Aradu.E1GHD	543	205	103	1.74619	1.81618e-25	Up	NA	NA	NA	NA	gi|920696110|gb|KOM39335.1|//hypothetical protein LR48_Vigan03g271700 [Vigna angularis]
Aradu.E3EHQ	1381	1363.65	1076.21	1.09472	1.03134e-79	Up	NA	GO:0016709//oxidoreductase activity, acting on paired donors, with incorporation or reduction of molecular oxygen, NAD(P)H as one donor, and incorporation of one atom of oxygen;GO:0004497//monooxygenase activity;GO:0016491//oxidoreductase activity;GO:0071949//FAD binding	GO:0044550//secondary metabolite biosynthetic process;GO:0055114//oxidation-reduction process	K00480//salicylate hydroxylase [EC:1.14.13.1];K09838//zeaxanthin epoxidase [EC:1.14.15.21]	gi|502121093|ref|XP_004497185.1|//PREDICTED: zeaxanthin epoxidase, chloroplastic-like [Cicer arietinum];gi|922408723|ref|XP_013470334.1|//FAD-dependent urate hydroxylase-like protein [Medicago truncatula]
Aradu.E4FA8	9990	1840.39	1115.29	1.4758	1.48448e-169	Up	GO:0005887//integral component of plasma membrane;GO:0016021//integral component of membrane	GO:0005355//glucose transmembrane transporter activity;GO:0005351//sugar:proton symporter activity;GO:0022891//substrate-specific transmembrane transporter activity	GO:0055085//transmembrane transport;GO:0035428//hexose transmembrane transport;GO:0046323//glucose import	K16055//trehalose 6-phosphate synthase/phosphatase [EC:2.4.1.15 3.1.3.12];K08145//MFS transporter, SP family, solute carrier family 2 (facilitated glucose transporter), member 8;K08150//MFS transporter, SP family, solute carrier family 2 (myo-inositol transporter), member 13	gi|965656434|dbj|BAT72853.1|//hypothetical protein VIGAN_01029500 [Vigna angularis var. angularis];gi|357520915|ref|XP_003630746.1|//sugar porter (SP) family MFS transporter [Medicago truncatula]
Aradu.E58SH	3214	9911.95	34515.6	-1.0468	0	Down	NA	GO:0005524//ATP binding	NA	K10875//DNA repair and recombination protein RAD54 and RAD54-like protein [EC:3.6.4.-]	gi|356544159|ref|XP_003540522.1|//PREDICTED: protein chromatin remodeling 35-like isoform X1 [Glycine max]
Aradu.E61FK	2270	1981.4	1074.74	1.63574	8.31713e-212	Up	GO:0016020//membrane;GO:0016021//integral component of membrane	GO:0015369//calcium:proton antiporter activity;GO:0008324//cation transmembrane transporter activity	GO:0070588//calcium ion transmembrane transport;GO:0098655//cation transmembrane transport;GO:0006816//calcium ion transport	K07300//Ca2+:H+ antiporter	gi|357490695|ref|XP_003615635.1|//vacuolar cation/proton exchanger 3 [Medicago truncatula];gi|965666055|dbj|BAT81543.1|//hypothetical protein VIGAN_03128900 [Vigna angularis var. angularis];gi|734419346|gb|KHN40067.1|//Vacuolar cation/proton exchanger 1 [Glycine soja]
Aradu.E6KMV	1072	1033	252	2.78855	3.39859e-215	Up	GO:0005737//cytoplasm	GO:0004364//glutathione transferase activity	GO:0006749//glutathione metabolic process;GO:0009407//toxin catabolic process	K00799//glutathione S-transferase [EC:2.5.1.18]	gi|734392741|gb|KHN27768.1|//Putative glutathione S-transferase [Glycine soja]
Aradu.E70EA	1844	735.44	2493.86	-1.00849	1.0448e-75	Down	NA	GO:0003978//UDP-glucose 4-epimerase activity;GO:0050662//coenzyme binding	GO:0006012//galactose metabolic process	K01784//UDP-glucose 4-epimerase [EC:5.1.3.2]	gi|951053440|ref|XP_014520995.1|//PREDICTED: UDP-glucose 4-epimerase GEPI48 [Vigna radiata var. radiata]
Aradu.E721V	441	12	91	-2.16963	4.98525e-10	Down	NA	GO:0004866//endopeptidase inhibitor activity	GO:0010466//negative regulation of peptidase activity	NA	gi|922349214|ref|XP_003619743.2|//Kunitz type trypsin inhibitor / Alpha-fucosidase [Medicago truncatula]
Aradu.E735W	1457	459.46	328.76	1.23611	1.44138e-33	Up	GO:0016021//integral component of membrane	GO:0004805//trehalose-phosphatase activity;GO:0016787//hydrolase activity;GO:0003824//catalytic activity	GO:0005992//trehalose biosynthetic process;GO:0016311//dephosphorylation;GO:0044237//cellular metabolic process	K01087//trehalose 6-phosphate phosphatase [EC:3.1.3.12]	gi|356518491|ref|XP_003527912.1|//PREDICTED: probable trehalose-phosphate phosphatase J isoform X2 [Glycine max];gi|571450061|ref|XP_003523824.2|//PREDICTED: probable trehalose-phosphate phosphatase J [Glycine max]
Aradu.E7MLC	1054	6525.68	5431.24	1.01805	0	Up	GO:0005829//cytosol;GO:0009507//chloroplast	GO:0008806//carboxymethylenebutenolidase activity;GO:0016787//hydrolase activity	NA	K01061//carboxymethylenebutenolidase [EC:3.1.1.45]	gi|224131618|ref|XP_002321135.1|//dienelactone hydrolase family protein [Populus trichocarpa];gi|470103051|ref|XP_004287959.1|//PREDICTED: carboxymethylenebutenolidase homolog [Fragaria vesca subsp. vesca]
Aradu.E8QSY	1757	419.74	1585.24	-1.16393	4.66522e-61	Down	NA	GO:0016829//lyase activity;GO:0016705//oxidoreductase activity, acting on paired donors, with incorporation or reduction of molecular oxygen;GO:0020037//heme binding;GO:0005506//iron ion binding;GO:0004497//monooxygenase activity	GO:0055114//oxidation-reduction process	K01723//hydroperoxide dehydratase [EC:4.2.1.92]	gi|323575357|dbj|BAJ78218.1|//9/13-hydroperoxide lyase [Lotus japonicus]
Aradu.EAG5M	2298	195.75	807	-1.29035	3.21755e-37	Down	GO:0016021//integral component of membrane	GO:0005509//calcium ion binding	NA	K04733//interleukin-1 receptor-associated kinase 4 [EC:2.7.11.1];K09597//signal peptide peptidase-like 2B [EC:3.4.23.-];K04730//interleukin-1 receptor-associated kinase 1 [EC:2.7.11.1]	gi|357512783|ref|XP_003626680.1|//vacuolar-sorting receptor-like protein [Medicago truncatula]
Aradu.ED3FV	990	187.88	1153.77	-1.86527	9.32118e-89	Down	NA	GO:0016787//hydrolase activity	NA	K07766//diphosphoinositol-polyphosphate diphosphatase [EC:3.6.1.52]	gi|950988287|ref|XP_014503942.1|//PREDICTED: nudix hydrolase 18, mitochondrial-like [Vigna radiata var. radiata]
Aradu.EDQ3S	744	4	220	-5.02815	5.81164e-42	Down	GO:0016021//integral component of membrane	GO:0004222//metalloendopeptidase activity	GO:0007155//cell adhesion;GO:0006508//proteolysis	K01404//leishmanolysin [EC:3.4.24.36]	gi|734375457|gb|KHN21000.1|//Leishmanolysin-like peptidase [Glycine soja];gi|593795496|ref|XP_007160786.1|//hypothetical protein PHAVU_001G016500g [Phaseolus vulgaris]
Aradu.EE03A	616	9	54	-1.83176	1.212e-05	Down	NA	NA	NA	NA	gi|734381848|gb|KHN23435.1|//hypothetical protein glysoja_015737 [Glycine soja]
Aradu.EF677	1229	1458.48	7061.46	-1.52229	0	Down	GO:0048046//apoplast;GO:0005618//cell wall	GO:0016762//xyloglucan:xyloglucosyl transferase activity;GO:0033946//xyloglucan-specific endo-beta-1,4-glucanase activity	GO:0016998//cell wall macromolecule catabolic process;GO:0010411//xyloglucan metabolic process;GO:0042546//cell wall biogenesis;GO:0071555//cell wall organization	K08235//xyloglucan:xyloglucosyl transferase [EC:2.4.1.207]	gi|734330875|gb|KHN06880.1|//Putative xyloglucan endotransglucosylase/hydrolase protein 32 [Glycine soja]
Aradu.EH8VM	1279	240.41	1052.73	-1.37736	5.96872e-53	Down	NA	GO:0008948//oxaloacetate decarboxylase activity;GO:0046872//metal ion binding;GO:0008428//ribonuclease inhibitor activity;GO:0047443//4-hydroxy-4-methyl-2-oxoglutarate aldolase activity	GO:0043086//negative regulation of catalytic activity;GO:0051252//regulation of RNA metabolic process	NA	gi|225463540|ref|XP_002265968.1|//PREDICTED: putative 4-hydroxy-4-methyl-2-oxoglutarate aldolase 3 [Vitis vinifera]
Aradu.EIB6W	2861	2965.37	1736.16	1.52552	5.9308e-286	Up	GO:0016021//integral component of membrane;GO:0005886//plasma membrane	GO:0005544//calcium-dependent phospholipid binding;GO:0005509//calcium ion binding;GO:0003824//catalytic activity;GO:0016874//ligase activity	NA	K01736//chorismate synthase [EC:4.2.3.5]	gi|734390830|gb|KHN26984.1|//Multiple C2 and transmembrane domain-containing protein 1 [Glycine soja]
Aradu.EJA5A	1573	236.7	141.4	1.49648	1.12897e-23	Up	GO:0009705//plant-type vacuole membrane	GO:0015140//malate transmembrane transporter activity	GO:0015743//malate transport	K03695//ATP-dependent Clp protease ATP-binding subunit ClpB	gi|922367151|ref|XP_013455742.1|//aluminum activated malate transporter family protein [Medicago truncatula]
Aradu.EL1FN	2210	1333.74	558.69	2.00856	4.53728e-189	Up	GO:0016021//integral component of membrane;GO:0005737//cytoplasm	GO:0004364//glutathione transferase activity;GO:0016853//isomerase activity	GO:0006749//glutathione metabolic process	K01800//maleylacetoacetate isomerase [EC:5.2.1.2]	gi|357484413|ref|XP_003612494.1|//transmembrane protein, putative [Medicago truncatula];gi|194466141|gb|ACF74301.1|//glutathione S-transferase 2 [Arachis hypogaea]
Aradu.ELJ24	1733	445.49	326.18	1.20293	2.68224e-31	Up	NA	NA	NA	NA	gi|920692144|gb|KOM35369.1|//hypothetical protein LR48_Vigan02g151900 [Vigna angularis]
Aradu.EM87N	1332	206.66	165.75	1.07146	4.37934e-13	Up	GO:0032040//small-subunit processome	NA	GO:0006364//rRNA processing	K14554//U3 small nucleolar RNA-associated protein 21	gi|947126283|gb|KRH74137.1|//hypothetical protein GLYMA_01G001600 [Glycine max]
Aradu.EMG6I	1353	2693.73	1589.97	1.51381	5.73878e-257	Up	NA	NA	NA	K04733//interleukin-1 receptor-associated kinase 4 [EC:2.7.11.1]	gi|571470043|ref|XP_003530957.2|//PREDICTED: thaumatin-like protein [Glycine max]
Aradu.ENG34	737	142.53	115.03	1.06246	1.94293e-09	Up	NA	GO:0003743//translation initiation factor activity	GO:0006413//translational initiation	K03113//translation initiation factor 1	gi|571473966|ref|XP_006586085.1|//PREDICTED: protein translation factor SUI1 homolog 2 [Glycine max]
Aradu.EP6I4	1419	529.2	442.75	1.01053	3.22904e-28	Up	NA	GO:0016747//transferase activity, transferring acyl groups other than amino-acyl groups	NA	K15400//omega-hydroxypalmitate O-feruloyl transferase [EC:2.3.1.188]	gi|947057497|gb|KRH06903.1|//hypothetical protein GLYMA_16G053300 [Glycine max];gi|356561604|ref|XP_003549071.1|//PREDICTED: omega-hydroxypalmitate O-feruloyl transferase-like [Glycine max]
Aradu.EP9BX	339	82.16	39.6	1.80614	1.14699e-11	Up	NA	NA	NA	NA	gi|502106495|ref|XP_004492961.1|//PREDICTED: uncharacterized protein LOC101490459 [Cicer arietinum]
Aradu.EQ0IM	873	21	116.99	-1.72472	1.3573e-09	Down	NA	NA	NA	NA	gi|571478691|ref|XP_006587638.1|//PREDICTED: uncharacterized protein LOC102659694 [Glycine max]
Aradu.EQ6UY	1998	478.86	178.28	2.17867	3.22565e-76	Up	NA	NA	NA	K04733//interleukin-1 receptor-associated kinase 4 [EC:2.7.11.1];K16219//protein N-terminal methyltransferase [EC:2.1.1.244];K08235//xyloglucan:xyloglucosyl transferase [EC:2.4.1.207]	gi|388519251|gb|AFK47687.1|//unknown [Lotus japonicus];gi|296089714|emb|CBI39533.3|//unnamed protein product [Vitis vinifera]
Aradu.ES9F5	2249	862.07	686.3	1.08217	4.55963e-50	Up	GO:0009331//glycerol-3-phosphate dehydrogenase complex;GO:0005829//cytosol	GO:0051287//NAD binding;GO:0004367//glycerol-3-phosphate dehydrogenase [NAD+] activity	GO:0046168//glycerol-3-phosphate catabolic process;GO:0005975//carbohydrate metabolic process;GO:0055114//oxidation-reduction process	K00006//glycerol-3-phosphate dehydrogenase (NAD+) [EC:1.1.1.8]	gi|955311910|ref|XP_014629229.1|//PREDICTED: glycerol-3-phosphate dehydrogenase [NAD(+)] GPDHC1, cytosolic [Glycine max]
Aradu.ETA60	2140	213	1046	-1.54275	4.80756e-62	Down	NA	NA	NA	K03217//YidC/Oxa1 family membrane protein insertase;K01365//cathepsin L [EC:3.4.22.15]	gi|951001957|ref|XP_014507215.1|//PREDICTED: mitochondrial inner membrane protein OXA1-like [Vigna radiata var. radiata];gi|734337509|gb|KHN08446.1|//Hypothetical protein glysoja_014211 [Glycine soja];gi|947072396|gb|KRH21287.1|//hypothetical protein GLYMA_13G230500 [Glycine max]
Aradu.ETS8A	1363	546.84	323.8	1.50922	3.60744e-53	Up	NA	NA	NA	K04733//interleukin-1 receptor-associated kinase 4 [EC:2.7.11.1];K12173//BRCA1-A complex subunit BRE	gi|502131613|ref|XP_004501042.1|//PREDICTED: pathogenesis-related protein 5-like [Cicer arietinum]
Aradu.EWZ0P	1004	9	274.29	-4.17643	3.13164e-48	Down	GO:0031224//intrinsic component of membrane;GO:0046658//anchored component of plasma membrane	NA	NA	NA	gi|951043428|ref|XP_014518361.1|//PREDICTED: umecyanin-like [Vigna radiata var. radiata]
Aradu.EX4VM	1273	139.98	102.53	1.20238	5.64212e-11	Up	NA	NA	NA	NA	gi|734409115|gb|KHN35210.1|//hypothetical protein glysoja_041327 [Glycine soja]
Aradu.EX5YL	1836	78	5	4.71668	2.87898e-25	Up	NA	NA	NA	NA	NA
Aradu.EYP74	522	51.97	9.72	3.17186	8.13101e-14	Up	NA	NA	NA	NA	gi|502143676|ref|XP_004505423.1|//PREDICTED: uncharacterized protein LOC101513513 [Cicer arietinum]
Aradu.EZW7V	1599	69.49	521.01	-2.15323	4.55542e-49	Down	GO:0000790//nuclear chromatin	GO:0003677//DNA binding	GO:0009555//pollen development;GO:0006281//DNA repair;GO:0007141//male meiosis I;GO:0006260//DNA replication;GO:0048232//male gamete generation;GO:0051026//chiasma assembly	K07466//replication factor A1	gi|502165212|ref|XP_004513472.1|//PREDICTED: replication protein A 70 kDa DNA-binding subunit A [Cicer arietinum]
Aradu.F02NL	1916	355.77	1256.87	-1.06761	1.29071e-42	Down	GO:0005576//extracellular region	GO:0004650//polygalacturonase activity	GO:0005975//carbohydrate metabolic process;GO:0071555//cell wall organization	K01184//polygalacturonase [EC:3.2.1.15]	gi|356530050|ref|XP_003533597.1|//PREDICTED: probable polygalacturonase [Glycine max];gi|965668978|dbj|BAT83585.1|//hypothetical protein VIGAN_04075500 [Vigna angularis var. angularis]
Aradu.F0EVB	1033	18	921.79	-4.92516	8.81124e-170	Down	NA	GO:0003723//RNA binding;GO:0070039//rRNA (guanosine-2'-O-)-methyltransferase activity	GO:0000453//enzyme-directed rRNA 2'-O-methylation	NA	gi|734319371|gb|KHN03411.1|//tRNA (guanosine(18)-2'-O)-methyltransferase [Glycine soja];gi|951007348|ref|XP_014508703.1|//PREDICTED: putative TrmH family tRNA/rRNA methyltransferase [Vigna radiata var. radiata];gi|763805560|gb|KJB72498.1|//hypothetical protein B456_011G181900 [Gossypium raimondii]
Aradu.F1I05	3411	89.69	891.05	-2.55928	3.12148e-101	Down	NA	NA	NA	K17604//zinc finger SWIM domain-containing protein 3	gi|147799567|emb|CAN68463.1|//hypothetical protein VITISV_040413 [Vitis vinifera];gi|147765294|emb|CAN77889.1|//hypothetical protein VITISV_003778 [Vitis vinifera]
Aradu.F2DYX	2018	747.37	2995.75	-1.24982	2.20906e-127	Down	NA	GO:0016787//hydrolase activity;GO:0004301//epoxide hydrolase activity	NA	K14759//isochorismate synthase / 2-succinyl-5-enolpyruvyl-6-hydroxy-3-cyclohexene-1-carboxylate synthase / 2-succinyl-6-hydroxy-2,4-cyclohexadiene-1-carboxylate synthase / O-succinylbenzoate synthase [EC:5.4.4.2 2.2.1.9 4.2.99.20 4.2.1.113];K01259//proline iminopeptidase [EC:3.4.11.5];K08726//soluble epoxide hydrolase / lipid-phosphate phosphatase [EC:3.3.2.10 3.1.3.76];K10144//RING finger and CH…	gi|2764806|emb|CAA55294.1|//epoxide hydrolase [Glycine max];gi|920711580|gb|KOM52829.1|//hypothetical protein LR48_Vigan09g148800 [Vigna angularis];gi|951018511|ref|XP_014511821.1|//PREDICTED: uncharacterized protein LOC106770531 [Vigna radiata var. radiata]
Aradu.F3KB2	804	4498.74	33855.5	-2.15859	0	Down	GO:0016020//membrane	NA	NA	NA	gi|312599845|gb|ADQ91848.1|//late embryogenesis abundant protein group 9 protein [Arachis hypogaea]
Aradu.F3XNS	1538	524.15	297.54	1.5701	5.56545e-54	Up	GO:0016021//integral component of membrane	NA	NA	K08678//UDP-glucuronate decarboxylase [EC:4.1.1.35]	gi|502150952|ref|XP_004508205.1|//PREDICTED: UDP-glucuronic acid decarboxylase 2-like [Cicer arietinum]
Aradu.F4M5D	1479	391.53	289.09	1.19081	2.71309e-27	Up	NA	GO:0016210//naringenin-chalcone synthase activity	GO:0009813//flavonoid biosynthetic process	K00660//chalcone synthase [EC:2.3.1.74]	gi|28261335|gb|AAO32821.1|//chalcone synthase [Arachis hypogaea]
Aradu.F5QP2	1143	103	75	1.21089	1.34733e-08	Up	NA	GO:0031072//heat shock protein binding;GO:0051082//unfolded protein binding	NA	K12309//beta-galactosidase [EC:3.2.1.23]	gi|502132505|ref|XP_004501393.1|//PREDICTED: uncharacterized protein LOC101488433 [Cicer arietinum];gi|734413730|gb|KHN37100.1|//hypothetical protein glysoja_009128 [Glycine soja]
Aradu.F7PQZ	2166	573.9	3954.47	-2.03141	0	Down	NA	GO:0003825//alpha,alpha-trehalose-phosphate synthase (UDP-forming) activity	GO:0005992//trehalose biosynthetic process	K16055//trehalose 6-phosphate synthase/phosphatase [EC:2.4.1.15 3.1.3.12]	gi|356510997|ref|XP_003524218.1|//PREDICTED: alpha,alpha-trehalose-phosphate synthase [UDP-forming] 1-like [Glycine max];gi|734329792|gb|KHN06447.1|//Alpha,alpha-trehalose-phosphate synthase [UDP-forming] 1 [Glycine soja];gi|922329941|ref|XP_003629883.2|//trehalose-6-phosphate synthase [Medicago truncatula];gi|502140542|ref|XP_004504252.1|//PREDICTED: alpha,alpha-trehalose-phosphate synthase [UDP…
Aradu.F8QAT	7138	39821.9	150334	-1.16333	0	Down	NA	GO:0046872//metal ion binding;GO:0005524//ATP binding;GO:0016301//kinase activity;GO:0050242//pyruvate, phosphate dikinase activity	GO:0016310//phosphorylation;GO:0006090//pyruvate metabolic process	K01006//pyruvate, orthophosphate dikinase [EC:2.7.9.1]	gi|734318222|gb|KHN03025.1|//Pyruvate, phosphate dikinase, chloroplastic [Glycine soja];gi|947102462|gb|KRH50954.1|//hypothetical protein GLYMA_07G253700 [Glycine max]
Aradu.F8RAG	1665	2067.56	1681.62	1.05128	1.70898e-112	Up	NA	NA	NA	K09422//myb proto-oncogene protein, plant	gi|563425559|gb|AHB59594.1|//putative R2R3 MYB protein 6 [Arachis hypogaea]
Aradu.F9LPP	1015	21.86	147.82	-2.00427	6.17462e-14	Down	GO:0009507//chloroplast	GO:0004497//monooxygenase activity;GO:0016984//ribulose-bisphosphate carboxylase activity	GO:0019253//reductive pentose-phosphate cycle;GO:0009853//photorespiration;GO:0055114//oxidation-reduction process	K01602//ribulose-bisphosphate carboxylase small chain [EC:4.1.1.39]	gi|540360866|gb|AGV08375.1|//ribulose-1,5-bisphosphate carboxylase/oxygenase small subunit [Arachis hypogaea]
Aradu.F9M07	871	95285.4	77283.1	1.05531	0	Up	NA	NA	NA	NA	gi|71040687|gb|AAZ20292.1|//auxin-repressed protein [Arachis hypogaea]
Aradu.FAG1P	1282	642.75	538.99	1.00721	9.6308e-34	Up	NA	NA	NA	NA	NA
Aradu.FAQ2E	833	256.71	171.57	1.33455	9.62358e-22	Up	GO:0016020//membrane	NA	NA	NA	gi|951041617|ref|XP_014517975.1|//PREDICTED: uncharacterized protein LOC106775373 [Vigna radiata var. radiata]
Aradu.FB2F2	2913	44.8	313.18	-2.05221	1.83437e-28	Down	GO:0016021//integral component of membrane	GO:0016174//NAD(P)H oxidase activity;GO:0005509//calcium ion binding;GO:0004601//peroxidase activity	GO:0098869//cellular oxidant detoxification;GO:0055114//oxidation-reduction process	K13447//respiratory burst oxidase [EC:1.6.3.- 1.11.1.-]	gi|356505839|ref|XP_003521697.1|//PREDICTED: respiratory burst oxidase homolog protein B-like [Glycine max]
Aradu.FBN6P	1522	288.62	80.34	2.59819	6.57488e-57	Up	GO:0005618//cell wall;GO:0005737//cytoplasm	GO:0045330//aspartyl esterase activity;GO:0030599//pectinesterase activity	GO:0045490//pectin catabolic process;GO:0042545//cell wall modification	K01051//pectinesterase [EC:3.1.1.11]	gi|950931338|ref|XP_014506619.1|//PREDICTED: probable pectinesterase 53 [Vigna radiata var. radiata]
Aradu.FC7FL	713	71	258	-1.10827	1.33343e-10	Down	NA	GO:0046872//metal ion binding	GO:0030001//metal ion transport	K04733//interleukin-1 receptor-associated kinase 4 [EC:2.7.11.1];K12823//ATP-dependent RNA helicase DDX5/DBP2 [EC:3.6.4.13];K10572//inositol-pentakisphosphate 2-kinase [EC:2.7.1.158]	gi|593794135|ref|XP_007160106.1|//hypothetical protein PHAVU_002G292900g [Phaseolus vulgaris];gi|922338233|ref|XP_013447106.1|//heavy metal transport/detoxification superfamily protein [Medicago truncatula]
Aradu.FFX4X	2002	1714.15	0	12.4965	9.26654e-248	Up	GO:0005737//cytoplasm	GO:0004842//ubiquitin-protein transferase activity	GO:0009966//regulation of signal transduction	K08592//sentrin-specific protease 1 [EC:3.4.22.68];K16278//E3 ubiquitin-protein ligase HOS1 [EC:2.3.2.27]	gi|955349197|ref|XP_003538986.3|//PREDICTED: E3 ubiquitin-protein ligase HOS1-like [Glycine max];gi|357484057|ref|XP_003612315.1|//Ulp1 protease family, carboxy-terminal domain protein [Medicago truncatula]
Aradu.FG622	1878	1572.44	66.54	5.31585	0	Up	NA	NA	NA	K09291//nucleoprotein TPR;K20478//golgin subfamily B member 1	gi|356500946|ref|XP_003519291.1|//PREDICTED: protein NETWORKED 4A-like isoform X1 [Glycine max]
Aradu.FH10G	1563	2143	7471.38	-1.04854	1.83139e-238	Down	NA	GO:0045552//dihydrokaempferol 4-reductase activity;GO:0050662//coenzyme binding;GO:0016621//cinnamoyl-CoA reductase activity	GO:0055114//oxidation-reduction process	K09753//cinnamoyl-CoA reductase [EC:1.2.1.44]	gi|593700751|ref|XP_007150805.1|//hypothetical protein PHAVU_005G182100g [Phaseolus vulgaris];gi|965604270|dbj|BAT91446.1|//hypothetical protein VIGAN_07004300 [Vigna angularis var. angularis]
Aradu.FHT7B	2072	247.48	152.72	1.44963	1.30425e-23	Up	GO:0005887//integral component of plasma membrane	GO:0005355//glucose transmembrane transporter activity;GO:0005351//sugar:proton symporter activity	GO:0046323//glucose import;GO:0015992//proton transport;GO:1904659//glucose transmembrane transport	K08150//MFS transporter, SP family, solute carrier family 2 (myo-inositol transporter), member 13	gi|593791456|ref|XP_007158767.1|//hypothetical protein PHAVU_002G180200g [Phaseolus vulgaris]
Aradu.FI298	876	1060	438	2.02827	1.82295e-152	Up	NA	NA	NA	NA	gi|734338081|gb|KHN08696.1|//Heme-binding protein 2 [Glycine soja]
Aradu.FJF3V	731	79	0	8.05699	1.39613e-23	Up	GO:0016272//prefoldin complex;GO:0005829//cytosol;GO:0005737//cytoplasm	GO:0051082//unfolded protein binding;GO:0051087//chaperone binding	GO:0006457//protein folding	K09550//prefoldin subunit 4	gi|502116842|ref|XP_004495612.1|//PREDICTED: probable prefoldin subunit 4 [Cicer arietinum]
Aradu.FL2WS	1263	61.23	700.02	-2.76188	1.43656e-86	Down	GO:0016021//integral component of membrane	GO:0008233//peptidase activity	GO:0006508//proteolysis	K00001//alcohol dehydrogenase [EC:1.1.1.1]	gi|388520339|gb|AFK48231.1|//unknown [Lotus japonicus]
Aradu.FM6Q1	3086	681.82	17	6.07899	8.55321e-216	Up	GO:0005737//cytoplasm	GO:0000287//magnesium ion binding;GO:0005524//ATP binding;GO:0003879//ATP phosphoribosyltransferase activity;GO:0004672//protein kinase activity	GO:0000105//histidine biosynthetic process;GO:0006355//regulation of transcription, DNA-templated;GO:0006468//protein phosphorylation	K00765//ATP phosphoribosyltransferase [EC:2.4.2.17]	gi|951009011|ref|XP_014509167.1|//PREDICTED: probable serine/threonine-protein kinase DDB_G0282963 isoform X2 [Vigna radiata var. radiata];gi|734340655|gb|KHN09460.1|//ATP phosphoribosyltransferase [Glycine soja];gi|571467635|ref|XP_006583997.1|//PREDICTED: serine/threonine-protein kinase STY8-like isoform X2 [Glycine max];gi|951009015|ref|XP_014509168.1|//PREDICTED: probable serine/threonine-pro…
Aradu.FNR52	3409	325.98	4428.36	-3.01071	0	Down	GO:0005634//nucleus	GO:0008289//lipid binding;GO:0003677//DNA binding	GO:0006869//lipid transport;GO:0006355//regulation of transcription, DNA-templated;GO:0009734//auxin-activated signaling pathway	K17964//leucine-rich PPR motif-containing protein, mitochondrial;K14486//auxin response factor	gi|950990570|ref|XP_014504340.1|//PREDICTED: auxin response factor 6-like [Vigna radiata var. radiata];gi|502151412|ref|XP_004508428.1|//PREDICTED: pentatricopeptide repeat-containing protein At5g64320, mitochondrial [Cicer arietinum]
Aradu.FPC2C	1400	8961.43	36136.4	-1.25844	0	Down	NA	NA	NA	K10779//transcriptional regulator ATRX [EC:3.6.4.12]	gi|574139409|emb|CCW28814.1|//seed maturation protein [Arachis hypogaea]
Aradu.FW4A8	1285	125.24	43.18	2.28947	2.27151e-22	Up	NA	NA	NA	NA	gi|965658061|dbj|BAT74480.1|//hypothetical protein VIGAN_01215600 [Vigna angularis var. angularis]
Aradu.FW9WM	3634	636.4	488.19	1.1357	2.70977e-40	Up	NA	GO:0046556//alpha-L-arabinofuranosidase activity;GO:0003824//catalytic activity	GO:0046373//L-arabinose metabolic process	K09955//uncharacterized protein	gi|593699899|ref|XP_007150388.1|//hypothetical protein PHAVU_005G149100g [Phaseolus vulgaris];gi|950954496|ref|XP_014496439.1|//PREDICTED: uncharacterized protein LOC106758049 isoform X2 [Vigna radiata var. radiata];gi|950954489|ref|XP_014496438.1|//PREDICTED: uncharacterized protein LOC106758049 isoform X1 [Vigna radiata var. radiata]
Aradu.FX2GH	873	74.57	15.99	2.97463	4.45193e-18	Up	GO:0016021//integral component of membrane	NA	GO:0045492//xylan biosynthetic process	K18801//glucuronoxylan 4-O-methyltransferase [EC:2.1.1.112]	gi|571542004|ref|XP_003552780.2|//PREDICTED: glucuronoxylan 4-O-methyltransferase 1-like [Glycine max]
Aradu.FX47V	685	1206.32	972.35	1.06427	1.33965e-67	Up	NA	NA	NA	NA	gi|388500728|gb|AFK38430.1|//unknown [Lotus japonicus]
Aradu.FXX49	987	108.77	76.03	1.26985	1.49883e-09	Up	NA	GO:0004674//protein serine/threonine kinase activity;GO:0005524//ATP binding;GO:0004714//transmembrane receptor protein tyrosine kinase activity	GO:0018108//peptidyl-tyrosine phosphorylation	K04733//interleukin-1 receptor-associated kinase 4 [EC:2.7.11.1]	gi|920682214|gb|KOM28986.1|//hypothetical protein LR48_Vigan627s003500 [Vigna angularis]
Aradu.FY1SG	978	76	339	-1.40401	1.16154e-18	Down	NA	GO:0016787//hydrolase activity	GO:0008152//metabolic process	K13258//2-hydroxyisoflavanone dehydratase [EC:4.2.1.105];K20506//tuliposide A-converting enzyme [EC:4.2.99.22]	gi|947103577|gb|KRH51960.1|//hypothetical protein GLYMA_06G038000 [Glycine max]
Aradu.FZS1B	393	90.49	62.5	1.28711	2.28996e-08	Up	NA	NA	NA	NA	NA
Aradu.G01FC	444	4198.96	2597.53	1.4461	0	Up	GO:0044434//chloroplast part;GO:0030529//intracellular ribonucleoprotein complex	NA	NA	K02961//small subunit ribosomal protein S17	gi|297743261|emb|CBI36128.3|//unnamed protein product [Vitis vinifera]
Aradu.G0Z55	1114	27	170.84	-1.90841	5.9135e-15	Down	NA	GO:0051213//dioxygenase activity	NA	K05278//flavonol synthase [EC:1.14.11.23];K04124//gibberellin 3-beta-dioxygenase [EC:1.14.11.15];K04125//gibberellin 2-oxidase [EC:1.14.11.13]	gi|593796428|ref|XP_007161252.1|//hypothetical protein PHAVU_001G054800g [Phaseolus vulgaris]
Aradu.G1DZV	1005	2523.76	10380.5	-1.28702	0	Down	NA	NA	NA	K04733//interleukin-1 receptor-associated kinase 4 [EC:2.7.11.1];K16219//protein N-terminal methyltransferase [EC:2.1.1.244];K08235//xyloglucan:xyloglucosyl transferase [EC:2.4.1.207]	gi|734324196|gb|KHN04971.1|//F-box protein PP2-B1 [Glycine soja]
Aradu.G1HJM	374	59	1	6.63585	7.81569e-20	Up	NA	NA	NA	NA	NA
Aradu.G1LZN	2857	1049.27	772.47	1.19504	8.95722e-71	Up	GO:0005887//integral component of plasma membrane;GO:0009507//chloroplast	GO:0008271//secondary active sulfate transmembrane transporter activity	GO:1902358//sulfate transmembrane transport	K17471//sulfate transporter 3	gi|356572214|ref|XP_003554265.1|//PREDICTED: sulfate transporter 3.1-like [Glycine max]
Aradu.G1PE7	471	49.8	39.05	1.10403	0.000149792	Up	NA	NA	NA	NA	NA
Aradu.G27H3	1485	136	85	1.43128	1.67646e-13	Up	NA	NA	NA	K13422//transcription factor MYC2	gi|593266246|ref|XP_007135301.1|//hypothetical protein PHAVU_010G117900g [Phaseolus vulgaris]
Aradu.G2KXQ	1689	139.93	564.59	-1.25929	1.3066e-25	Down	GO:0016021//integral component of membrane	GO:0004674//protein serine/threonine kinase activity;GO:0005524//ATP binding	GO:0006468//protein phosphorylation	K04733//interleukin-1 receptor-associated kinase 4 [EC:2.7.11.1]	gi|357468623|ref|XP_003604596.1|//receptor-like kinase [Medicago truncatula]
Aradu.G3AR6	1021	189.52	827.58	-1.37334	8.46639e-42	Down	NA	GO:0033883//pyridoxal phosphatase activity	GO:0016311//dephosphorylation	K13248//pyridoxal phosphate phosphatase PHOSPHO2 [EC:3.1.3.74]	gi|920680573|gb|KOM27438.1|//hypothetical protein LR48_Vigan406s024800 [Vigna angularis]
Aradu.G3DHZ	1506	157.57	691.7	-1.38095	1.72627e-35	Down	NA	GO:0046872//metal ion binding;GO:0030570//pectate lyase activity	GO:0045490//pectin catabolic process	K01728//pectate lyase [EC:4.2.2.2]	gi|947108850|gb|KRH57176.1|//hypothetical protein GLYMA_05G044000 [Glycine max]
Aradu.G49IM	2078	21.76	158.68	-2.11316	9.21819e-16	Down	NA	NA	NA	K05909//laccase [EC:1.10.3.2]	gi|723689023|ref|XP_010319213.1|//PREDICTED: uncharacterized protein LOC101255289 [Solanum lycopersicum]
Aradu.G4JAG	626	0	94.92	-6.81543	7.44557e-19	Down	GO:0005741//mitochondrial outer membrane	GO:0008308//voltage-gated anion channel activity	GO:0006820//anion transport;GO:1903959//regulation of anion transmembrane transport	K15040//voltage-dependent anion channel protein 2	gi|388499160|gb|AFK37646.1|//unknown [Lotus japonicus];gi|734352829|gb|KHN13242.1|//Outer plastidial membrane protein porin [Glycine soja]
Aradu.G4PX6	2574	955.09	777.47	1.05006	1.01097e-52	Up	NA	GO:0047268//galactinol-raffinose galactosyltransferase activity	NA	K06617//raffinose synthase [EC:2.4.1.82]	gi|356552396|ref|XP_003544554.1|//PREDICTED: probable galactinol--sucrose galactosyltransferase 1 [Glycine max]
Aradu.G4V4T	1766	123.47	615.36	-1.56406	6.80826e-38	Down	NA	NA	NA	NA	gi|571492632|ref|XP_006592295.1|//PREDICTED: syndetin-like isoform X2 [Glycine max];gi|955353308|ref|XP_014620082.1|//PREDICTED: syndetin-like isoform X1 [Glycine max]
Aradu.G4XFI	985	271.15	1318.62	-1.52866	8.85849e-77	Down	NA	NA	NA	K01897//long-chain acyl-CoA synthetase [EC:6.2.1.3]	gi|342365845|gb|AEL30378.1|//unknown [Arachis hypogaea];gi|965615007|dbj|BAU00640.1|//hypothetical protein VIGAN_10225100 [Vigna angularis var. angularis];gi|982895289|gb|AMB19005.1|//long chain acyl-CoA synthetase 4 [Arachis hypogaea]
Aradu.G54CE	285	48.1	37.56	1.11005	0.000177903	Up	NA	NA	NA	NA	NA
Aradu.G5LLA	799	112.33	24.25	2.96489	2.59739e-26	Up	NA	NA	NA	NA	gi|595927035|ref|XP_007215061.1|//hypothetical protein PRUPE_ppa012279mg [Prunus persica]
Aradu.G6IK8	3021	231.05	789.85	-1.02017	1.50407e-25	Down	GO:0009507//chloroplast	GO:0005524//ATP binding;GO:0004356//glutamate-ammonia ligase activity	GO:0009399//nitrogen fixation;GO:0006542//glutamine biosynthetic process	K01915//glutamine synthetase [EC:6.3.1.2]	gi|356555606|ref|XP_003546121.1|//PREDICTED: glutamine synthetase leaf isozyme, chloroplastic [Glycine max]
Aradu.G70BL	669	0	39	-5.5322	6.19513e-09	Down	NA	NA	NA	K01887//arginyl-tRNA synthetase [EC:6.1.1.19]	gi|763787295|gb|KJB54291.1|//hypothetical protein B456_009G028100 [Gossypium raimondii];gi|1000977240|ref|XP_015571820.1|//PREDICTED: arginine--tRNA ligase, cytoplasmic isoform X1 [Ricinus communis]
Aradu.G71TJ	1977	242.81	158.24	1.37092	1.87252e-21	Up	NA	NA	NA	NA	gi|502137481|ref|XP_004503097.1|//PREDICTED: uncharacterized protein LOC101491890 [Cicer arietinum]
Aradu.G7446	429	408	36	4.25571	1.01791e-119	Up	NA	NA	NA	NA	gi|734338653|gb|KHN08842.1|//hypothetical protein glysoja_044024 [Glycine soja]
Aradu.G7BKV	2742	1576.34	1304.47	1.02632	7.17219e-83	Up	GO:0016021//integral component of membrane	GO:0004674//protein serine/threonine kinase activity;GO:0005524//ATP binding	GO:0006468//protein phosphorylation	K00924	gi|951009853|ref|XP_014509399.1|//PREDICTED: receptor-like protein kinase HSL1 [Vigna radiata var. radiata]
Aradu.G7CTI	1508	371.79	242.56	1.36935	6.47528e-32	Up	NA	GO:0061630//ubiquitin protein ligase activity;GO:0046872//metal ion binding	GO:0043161//proteasome-mediated ubiquitin-dependent protein catabolic process	K20715//phototropin [EC:2.7.11.1]	gi|734422836|gb|KHN41757.1|//E3 ubiquitin-protein ligase ATL9 [Glycine soja]
Aradu.G7MBB	2424	471.12	2971.61	-1.90387	1.63749e-232	Down	GO:0005623//cell	NA	GO:0000055//ribosomal large subunit export from nucleus;GO:0042254//ribosome biogenesis;GO:0030036//actin cytoskeleton organization;GO:0042273//ribosomal large subunit biogenesis	K14856//protein SDA1	gi|920697043|gb|KOM40268.1|//hypothetical protein LR48_Vigan04g046600 [Vigna angularis];gi|965663897|dbj|BAT79606.1|//hypothetical protein VIGAN_02251900 [Vigna angularis var. angularis]
Aradu.G870M	1143	214	137	1.39664	1.31978e-19	Up	NA	GO:0003824//catalytic activity;GO:0030170//pyridoxal phosphate binding	GO:0009058//biosynthetic process	K15849//bifunctional aspartate aminotransferase and glutamate/aspartate-prephenate aminotransferase [EC:2.6.1.1 2.6.1.78 2.6.1.79]	gi|976904538|gb|KVH92211.1|//Aminotransferase, class I/classII [Cynara cardunculus var. scolymus];gi|694407629|ref|XP_009378544.1|//PREDICTED: bifunctional aspartate aminotransferase and glutamate/aspartate-prephenate aminotransferase-like [Pyrus x bretschneideri];gi|764596780|ref|XP_004302193.2|//PREDICTED: bifunctional aspartate aminotransferase and glutamate/aspartate-prephenate aminotransfera…
Aradu.G88H9	2102	927	779.76	1.00275	1.34265e-47	Up	NA	GO:0004326//tetrahydrofolylpolyglutamate synthase activity;GO:0005524//ATP binding	GO:0046901//tetrahydrofolylpolyglutamate biosynthetic process	K20457//dihydrofolate synthase [EC:6.3.2.12]	gi|356533471|ref|XP_003535287.1|//PREDICTED: dihydrofolate synthetase-like isoform X1 [Glycine max];gi|571481973|ref|XP_006588819.1|//PREDICTED: dihydrofolate synthetase-like isoform X2 [Glycine max]
Aradu.G97XD	1096	665.48	384.99	1.54278	2.03061e-66	Up	NA	NA	NA	NA	gi|920689227|gb|KOM33210.1|//hypothetical protein LR48_Vigan01g276600 [Vigna angularis]
Aradu.G9HBE	796	208.41	109.58	1.68065	1.34758e-24	Up	NA	GO:0016740//transferase activity	GO:0044237//cellular metabolic process;GO:1901564//organonitrogen compound metabolic process	K03283//heat shock 70kDa protein 1/8;K01800//maleylacetoacetate isomerase [EC:5.2.1.2]	gi|194466141|gb|ACF74301.1|//glutathione S-transferase 2 [Arachis hypogaea]
Aradu.G9TPP	1767	1040.3	4.05	8.75807	1.06351e-269	Up	GO:0005634//nucleus;GO:0005737//cytoplasm	GO:0004674//protein serine/threonine kinase activity;GO:0005524//ATP binding	GO:0006468//protein phosphorylation;GO:0035556//intracellular signal transduction	K14498//serine/threonine-protein kinase SRK2 [EC:2.7.11.1]	gi|356496854|ref|XP_003517280.1|//PREDICTED: serine/threonine-protein kinase SRK2I-like isoform X1 [Glycine max]
Aradu.GAZ1G	979	95	22	2.86363	8.38235e-22	Up	NA	GO:0016491//oxidoreductase activity	GO:0055114//oxidation-reduction process	K13070//momilactone-A synthase [EC:1.1.1.295];K09841//xanthoxin dehydrogenase [EC:1.1.1.288]	gi|593329575|ref|XP_007138214.1|//hypothetical protein PHAVU_009G190300g [Phaseolus vulgaris]
Aradu.GBG51	1694	923.43	6235.26	-2.00217	0	Down	NA	GO:0016787//hydrolase activity	GO:0008152//metabolic process	K07025//putative hydrolase of the HAD superfamily	gi|965607564|dbj|BAT94055.1|//hypothetical protein VIGAN_08062200 [Vigna angularis var. angularis]
Aradu.GC9C4	1404	378.03	1490.04	-1.22557	2.97954e-62	Down	NA	GO:0008124//4-alpha-hydroxytetrahydrobiopterin dehydratase activity	GO:0006729//tetrahydrobiopterin biosynthetic process	K01724//4a-hydroxytetrahydrobiopterin dehydratase [EC:4.2.1.96]	gi|947094390|gb|KRH42975.1|//hypothetical protein GLYMA_08G123200 [Glycine max]
Aradu.GD6AN	1689	335	162	1.80137	2.78723e-42	Up	NA	NA	NA	NA	gi|502138363|ref|XP_004503377.1|//PREDICTED: uncharacterized protein LOC101500982 isoform X2 [Cicer arietinum]
Aradu.GFT6J	794	11	134	-2.85345	1.86113e-18	Down	NA	NA	GO:0050789//regulation of biological process;GO:0050896//response to stimulus;GO:0065007//biological regulation	K13464//jasmonate ZIM domain-containing protein	gi|351727797|ref|NP_001237173.1|//uncharacterized LOC100305565 [Glycine max]
Aradu.GHZ7R	464	53.84	40.64	1.15898	4.83149e-05	Up	NA	NA	NA	K19041//E3 ubiquitin-protein ligase RNF38/44 [EC:2.3.2.27]	gi|947075692|gb|KRH24532.1|//hypothetical protein GLYMA_12G047300 [Glycine max]
Aradu.GII5H	990	132.65	75.98	1.55714	9.59429e-15	Up	NA	NA	NA	NA	gi|359806612|ref|NP_001241017.1|//uncharacterized protein LOC100798609 [Glycine max]
Aradu.GK0WC	1458	416.52	58.28	3.59052	1.10172e-109	Up	NA	NA	NA	K17604//zinc finger SWIM domain-containing protein 3	gi|985459025|ref|XP_015387983.1|//PREDICTED: protein FAR1-RELATED SEQUENCE 5-like [Citrus sinensis]
Aradu.GKH10	351	159	117	1.19572	3.79029e-12	Up	NA	NA	NA	NA	gi|593786101|ref|XP_007156091.1|//hypothetical protein PHAVU_003G257700g [Phaseolus vulgaris]
Aradu.GLV35	891	379	189	1.75702	4.65662e-46	Up	NA	GO:0003677//DNA binding	NA	K09422//myb proto-oncogene protein, plant	gi|951031888|ref|XP_014515266.1|//PREDICTED: transcription factor WER-like [Vigna radiata var. radiata]
Aradu.GQ9ZJ	2204	391	6	6.77927	2.17544e-121	Up	GO:0005794//Golgi apparatus;GO:0005829//cytosol;GO:0031201//SNARE complex;GO:0031902//late endosome membrane;GO:0016021//integral component of membrane;GO:0005789//endoplasmic reticulum membrane;GO:0012507//ER to Golgi transport vesicle membrane	GO:0005484//SNAP receptor activity;GO:0000149//SNARE binding	GO:0006896//Golgi to vacuole transport;GO:0048280//vesicle fusion with Golgi apparatus;GO:0006623//protein targeting to vacuole;GO:0042147//retrograde transport, endosome to Golgi;GO:0006888//ER to Golgi vesicle-mediated transport;GO:0006891//intra-Golgi vesicle-mediated transport	K08494//novel plant SNARE	gi|747104846|ref|XP_011100675.1|//PREDICTED: novel plant SNARE 12 [Sesamum indicum]
Aradu.GR4IB	2135	941.76	793.01	1.00123	3.25696e-48	Up	NA	NA	NA	K18875//enhanced disease susceptibility 1 protein	gi|502090769|ref|XP_004489334.1|//PREDICTED: senescence-associated carboxylesterase 101 isoform X1 [Cicer arietinum];gi|734363074|gb|KHN16343.1|//hypothetical protein glysoja_041437 [Glycine soja]
Aradu.GT2DG	3577	888	3830.78	-1.3558	4.19989e-184	Down	NA	GO:0005488//binding;GO:0005543//phospholipid binding	NA	K20043//clathrin coat assembly protein AP180;K20044//phosphatidylinositol-binding clathrin assembly protein	gi|502077071|ref|XP_004485543.1|//PREDICTED: putative clathrin assembly protein At1g03050 [Cicer arietinum];gi|357445719|ref|XP_003593137.1|//clathrin assembly plant-like protein, putative [Medicago truncatula]
Aradu.GT6LC	3645	678.08	510.96	1.16145	2.50938e-44	Up	GO:0005874//microtubule;GO:0005871//kinesin complex	GO:0005524//ATP binding;GO:0003777//microtubule motor activity;GO:0008017//microtubule binding;GO:0016887//ATPase activity	GO:0007018//microtubule-based movement	K10406//kinesin family member C2/C3	gi|571446669|ref|XP_006577158.1|//PREDICTED: kinesin-4 isoform X2 [Glycine max]
Aradu.GU2WH	4314	499	15	5.80921	9.57466e-159	Up	NA	NA	NA	K01528//dynamin GTPase [EC:3.6.5.5];K00276//primary-amine oxidase [EC:1.4.3.21];K13065//shikimate O-hydroxycinnamoyltransferase [EC:2.3.1.133]	gi|169246016|gb|ACA51023.1|//zinc finger protein ZFP133 [Arachis hypogaea]
Aradu.GW6SP	693	60	15	2.75321	6.93411e-14	Up	NA	NA	NA	NA	gi|734422515|gb|KHN41631.1|//hypothetical protein glysoja_036375 [Glycine soja]
Aradu.GWJ9U	553	0	21.55	-4.67641	1.58846e-05	Down	NA	NA	NA	K07466//replication factor A1	gi|828339041|ref|XP_012567644.1|//PREDICTED: uncharacterized protein LOC101506735, partial [Cicer arietinum]
Aradu.GWM5E	434	54.72	31.81	1.53579	5.85953e-07	Up	NA	NA	NA	NA	NA
Aradu.GWN5L	1433	1307	494.99	2.15399	1.68447e-202	Up	GO:0012505//endomembrane system;GO:0009535//chloroplast thylakoid membrane;GO:0016021//integral component of membrane	GO:0005451//monovalent cation:proton antiporter activity;GO:0020037//heme binding	GO:1902600//hydrogen ion transmembrane transport;GO:0017004//cytochrome complex assembly;GO:0006885//regulation of pH	NA	gi|748992106|gb|AJE72533.1|//cytochrome c biogenesis protein (plastid) [Medicago lupulina];gi|502079434|ref|XP_004486258.1|//PREDICTED: cation/H(+) antiporter 15-like [Cicer arietinum]
Aradu.GXG63	3326	1976.06	1172.41	1.50636	1.60164e-187	Up	GO:0005634//nucleus	GO:0003677//DNA binding	GO:0000160//phosphorelay signal transduction system;GO:0006355//regulation of transcription, DNA-templated	K14491//two-component response regulator ARR-B family	gi|728828764|gb|KHG08207.1|//Two-component response regulator-like APRR2 [Gossypium arboreum];gi|734424399|gb|KHN42627.1|//Two-component response regulator-like APRR2 [Glycine soja]
Aradu.GXJ7L	1429	314.17	220.66	1.26293	3.16378e-24	Up	NA	NA	NA	NA	gi|734416904|gb|KHN38621.1|//hypothetical protein glysoja_008170 [Glycine soja]
Aradu.GZ9A0	2936	59.62	328.36	-1.7082	1.34692e-23	Down	GO:0016021//integral component of membrane	GO:0004674//protein serine/threonine kinase activity;GO:0005524//ATP binding;GO:0004568//chitinase activity	GO:0006032//chitin catabolic process;GO:0006468//protein phosphorylation;GO:0005975//carbohydrate metabolic process	K04733//interleukin-1 receptor-associated kinase 4 [EC:2.7.11.1]	gi|922371984|ref|XP_013458150.1|//cysteine-rich RLK (receptor-like kinase) protein [Medicago truncatula]
Aradu.H03C7	2063	14.92	750.89	-4.90008	2.26547e-138	Down	NA	NA	NA	K05909//laccase [EC:1.10.3.2]	gi|723689023|ref|XP_010319213.1|//PREDICTED: uncharacterized protein LOC101255289 [Solanum lycopersicum]
Aradu.H2QUF	833	42	180	-1.34633	3.86961e-10	Down	GO:0016021//integral component of membrane;GO:0046658//anchored component of plasma membrane	GO:0009055//electron carrier activity	NA	K03006//DNA-directed RNA polymerase II subunit RPB1 [EC:2.7.7.6];K04733//interleukin-1 receptor-associated kinase 4 [EC:2.7.11.1]	gi|951067253|ref|XP_014524170.1|//PREDICTED: mavicyanin-like [Vigna radiata var. radiata]
Aradu.H2YS3	1280	160	607	-1.17042	1.33801e-24	Down	NA	NA	GO:0006351//transcription, DNA-templated	K12581//CCR4-NOT transcription complex subunit 7/8;K13126//polyadenylate-binding protein;K05941//glutathione gamma-glutamylcysteinyltransferase [EC:2.3.2.15];K01054//acylglycerol lipase [EC:3.1.1.23]	gi|950949491|ref|XP_014495173.1|//PREDICTED: protein CUP-SHAPED COTYLEDON 3-like [Vigna radiata var. radiata]
Aradu.H4BH8	1687	1	662	-8.61748	2.06586e-104	Down	NA	NA	NA	K13341//peroxin-7	gi|734379987|gb|KHN22630.1|//Peroxisome biogenesis protein 7 [Glycine soja];gi|356549206|ref|XP_003542988.1|//PREDICTED: peroxisome biogenesis protein 7 [Glycine max]
Aradu.H4UTD	4738	354	1710	-1.51897	3.42308e-98	Down	NA	NA	NA	K05909//laccase [EC:1.10.3.2];K01188//beta-glucosidase [EC:3.2.1.21];K14400//pre-mRNA cleavage complex 2 protein Pcf11;K00620//glutamate N-acetyltransferase / amino-acid N-acetyltransferase [EC:2.3.1.35 2.3.1.1]	gi|685311891|ref|XP_009146506.1|//PREDICTED: uncharacterized protein LOC103870148 [Brassica rapa];gi|731357378|ref|XP_010690177.1|//PREDICTED: uncharacterized protein LOC104903764 [Beta vulgaris subsp. vulgaris]
Aradu.H5XDC	2452	258.15	1170.81	-1.42802	6.40915e-62	Down	GO:0005634//nucleus;GO:0016021//integral component of membrane;GO:0005789//endoplasmic reticulum membrane	GO:0016787//hydrolase activity;GO:0043565//sequence-specific DNA binding;GO:0003700//transcription factor activity, sequence-specific DNA binding	GO:0006810//transport;GO:0006355//regulation of transcription, DNA-templated	K20347//p24 family protein beta-1;K09419//heat shock transcription factor, other eukaryote	gi|356570600|ref|XP_003553473.1|//PREDICTED: transmembrane emp24 domain-containing protein p24beta3-like [Glycine max];gi|947045959|gb|KRG95588.1|//hypothetical protein GLYMA_19G159500 [Glycine max]
Aradu.H802Y	1258	99.23	58	1.52793	3.47631e-11	Up	GO:0005634//nucleus;GO:0043232//intracellular non-membrane-bounded organelle;GO:0044446//intracellular organelle part	GO:0008017//microtubule binding	NA	K10436//microtubule-associated protein, RP/EB family	gi|920701766|gb|KOM44991.1|//hypothetical protein LR48_Vigan06g029700 [Vigna angularis]
Aradu.H88LD	2603	1629.27	5859.81	-1.09342	1.80807e-200	Down	GO:0016021//integral component of membrane;GO:0005789//endoplasmic reticulum membrane;GO:0005778//peroxisomal membrane	GO:0050661//NADP binding;GO:0004420//hydroxymethylglutaryl-CoA reductase (NADPH) activity	GO:0008299//isoprenoid biosynthetic process;GO:0016126//sterol biosynthetic process;GO:0015936//coenzyme A metabolic process;GO:0055114//oxidation-reduction process	K00021//hydroxymethylglutaryl-CoA reductase (NADPH) [EC:1.1.1.34]	gi|306416887|gb|ADM87300.1|//3-hydroxy-3-methylglutaryl-coenzyme A reductase [Glycyrrhiza uralensis];gi|502153809|ref|XP_004509470.1|//PREDICTED: 3-hydroxy-3-methylglutaryl-coenzyme A reductase 3-like [Cicer arietinum]
Aradu.H8L2E	432	14105.5	9609.3	1.30696	0	Up	NA	GO:0000166//nucleotide binding;GO:0003676//nucleic acid binding	NA	K13195//cold-inducible RNA-binding protein;K13098//RNA-binding protein FUS	gi|920699113|gb|KOM42338.1|//hypothetical protein LR48_Vigan04g253600 [Vigna angularis]
Aradu.H8PLQ	989	294.07	200.85	1.30325	7.71283e-24	Up	NA	NA	NA	K10802//high mobility group protein B1;K11296//high mobility group protein B3	gi|194466163|gb|ACF74312.1|//high mobility group protein 1 [Arachis hypogaea]
Aradu.H8XF8	1355	8	725	-5.74863	4.81321e-137	Down	NA	GO:0008233//peptidase activity;GO:0005488//binding;GO:0004842//ubiquitin-protein transferase activity;GO:0016874//ligase activity	GO:0016567//protein ubiquitination	K01363//cathepsin B [EC:3.4.22.1];K10590//E3 ubiquitin-protein ligase TRIP12 [EC:2.3.2.26];K11649//SWI/SNF related-matrix-associated actin-dependent regulator of chromatin subfamily C	gi|802674654|ref|XP_012081768.1|//PREDICTED: E3 ubiquitin-protein ligase UPL3 [Jatropha curcas];gi|593144113|ref|XP_007131846.1|//hypothetical protein PHAVU_011G046200g [Phaseolus vulgaris]
Aradu.H9U8I	1434	327.18	1307.26	-1.24518	3.70201e-56	Down	NA	NA	NA	K09286//EREBP-like factor	gi|193237575|dbj|BAG50064.1|//transcription factor AP2-EREBP [Lotus japonicus]
Aradu.H9WXZ	743	633.46	385.98	1.46793	6.27616e-59	Up	GO:0009507//chloroplast	NA	GO:0009793//embryo development ending in seed dormancy	NA	gi|351720857|ref|NP_001237958.1|//uncharacterized protein LOC100305614 [Glycine max]
Aradu.HF0IF	1008	150	116	1.12404	1.26586e-10	Up	NA	NA	NA	NA	NA
Aradu.HG244	1859	1922	1248	1.3762	1.77052e-159	Up	NA	NA	NA	NA	gi|342365835|gb|AEL30368.1|//hypothetical protein 205D04_8 [Arachis hypogaea]
Aradu.HI33E	1738	875.57	703.24	1.06941	6.928e-50	Up	NA	NA	NA	NA	gi|356507500|ref|XP_003522502.1|//PREDICTED: uncharacterized protein LOC100787397 [Glycine max];gi|593269682|ref|XP_007136981.1|//hypothetical protein PHAVU_009G090200g [Phaseolus vulgaris]
Aradu.HK5Y3	1686	45.84	270.08	-1.8055	3.78049e-21	Down	GO:0016021//integral component of membrane	GO:0016747//transferase activity, transferring acyl groups other than amino-acyl groups	GO:0006633//fatty acid biosynthetic process	K15397//3-ketoacyl-CoA synthase [EC:2.3.1.199]	gi|703114496|ref|XP_010100669.1|//3-ketoacyl-CoA synthase 1 [Morus notabilis]
Aradu.HN6FL	2692	236.38	839.81	-1.07575	2.31021e-29	Down	GO:0016020//membrane	GO:0016901//oxidoreductase activity, acting on the CH-OH group of donors, quinone or similar compound as acceptor;GO:0048038//quinone binding	GO:0005975//carbohydrate metabolic process;GO:0055114//oxidation-reduction process	NA	gi|502152166|ref|XP_004508796.1|//PREDICTED: HIPL1 protein-like [Cicer arietinum]
Aradu.HR3NA	1956	448.53	56.43	3.74388	1.33612e-121	Up	GO:0016020//membrane	NA	GO:0006351//transcription, DNA-templated	K12741//heterogeneous nuclear ribonucleoprotein A1/A3;K06236//collagen, type I, alpha;K14491//two-component response regulator ARR-B family;K01940//argininosuccinate synthase [EC:6.3.4.5]	gi|955313465|ref|XP_014629521.1|//PREDICTED: protein PHR1-LIKE 1-like isoform X1 [Glycine max]
Aradu.HSE9Z	372	1609	607	2.1596	8.97674e-250	Up	NA	NA	NA	NA	NA
Aradu.HSQ50	1604	43	382	-2.39796	2.90563e-41	Down	GO:0012505//endomembrane system;GO:0044446//intracellular organelle part;GO:0005773//vacuole	GO:0008168//methyltransferase activity	GO:0008152//metabolic process;GO:0032259//methylation	K20069//adaptin ear-binding coat-associated protein 1/2	gi|944225050|gb|KQK89454.1|//hypothetical protein SETIT_036315mg [Setaria italica];gi|357474569|ref|XP_003607569.1|//CMV 1a interacting protein [Medicago truncatula]
Aradu.HVW3A	2348	467.17	355.34	1.14795	1.65342e-30	Up	NA	GO:0004715//non-membrane spanning protein tyrosine kinase activity;GO:0004674//protein serine/threonine kinase activity;GO:0005524//ATP binding	GO:0006468//protein phosphorylation;GO:0018108//peptidyl-tyrosine phosphorylation	K04733//interleukin-1 receptor-associated kinase 4 [EC:2.7.11.1]	gi|920708754|gb|KOM50751.1|//hypothetical protein LR48_Vigan08g157800 [Vigna angularis];gi|356557471|ref|XP_003547039.1|//PREDICTED: probable serine/threonine-protein kinase RLCKVII [Glycine max]
Aradu.HWI6N	1028	0	130	-7.26916	1.49411e-24	Down	NA	NA	NA	K10589//ubiquitin-protein ligase E3 C [EC:2.3.2.26]	gi|571518405|ref|XP_006597687.1|//PREDICTED: E3 ubiquitin-protein ligase UPL6-like isoform X2 [Glycine max]
Aradu.HX36X	2270	23179.8	117500	-1.58851	0	Down	NA	NA	NA	NA	gi|240254706|gb|ACS49840.1|//seed biotinylated protein 68 kDa isoform [Glycine max]
Aradu.HY2QM	1964	13.9	288.6	-3.62271	2.51117e-46	Down	GO:0016020//membrane;GO:0016021//integral component of membrane	GO:0016709//oxidoreductase activity, acting on paired donors, with incorporation or reduction of molecular oxygen, NAD(P)H as one donor, and incorporation of one atom of oxygen;GO:0046872//metal ion binding;GO:0016705//oxidoreductase activity, acting on paired donors, with incorporation or reduction of molecular oxygen;GO:0020037//heme binding;GO:0005506//iron ion binding;GO:0004497//monooxygenas…	GO:0044550//secondary metabolite biosynthetic process;GO:0055114//oxidation-reduction process	K00512//steroid 17alpha-monooxygenase / 17alpha-hydroxyprogesterone deacetylase [EC:1.14.14.19 1.14.14.32];K14985//26-hydroxylase [EC:1.14.-.-];K07408//cytochrome P450 family 1 subfamily A polypeptide 1 [EC:1.14.14.1]	gi|920716689|gb|KOM56777.1|//hypothetical protein LR48_Vigan10g266900 [Vigna angularis];gi|9957087|gb|AAG09208.1|AF175278_1//wound-inducible P450 hydroxylase [Pisum sativum]
Aradu.HYJ3F	1855	76.01	347.02	-1.43755	1.07834e-19	Down	GO:0005887//integral component of plasma membrane	GO:0005355//glucose transmembrane transporter activity;GO:0005351//sugar:proton symporter activity	GO:0035428//hexose transmembrane transport;GO:0046323//glucose import	K08150//MFS transporter, SP family, solute carrier family 2 (myo-inositol transporter), member 13	gi|357447953|ref|XP_003594252.1|//inositol transporter, putative [Medicago truncatula]
Aradu.HYP1B	3512	1104.54	776.37	1.26184	6.24065e-81	Up	NA	NA	NA	K19513//protein CLEC16A	gi|947124006|gb|KRH72212.1|//hypothetical protein GLYMA_02G198100 [Glycine max];gi|955308007|ref|XP_014623916.1|//PREDICTED: uncharacterized protein LOC100815334 isoform X1 [Glycine max];gi|955308009|ref|XP_006575290.2|//PREDICTED: uncharacterized protein LOC100815334 isoform X2 [Glycine max]
Aradu.HZ16A	1603	418	310.77	1.18086	1.15723e-28	Up	NA	GO:0052887//7,9,9'-tricis-neurosporene:quinone oxidoreductase activity;GO:0052886//9,9'-dicis-carotene:quinone oxidoreductase activity;GO:0016788//hydrolase activity, acting on ester bonds	GO:0052889//9,9'-di-cis-zeta-carotene desaturation to 7,9,7',9'-tetra-cis-lycopene;GO:0055114//oxidation-reduction process	K21026//acetylajmaline esterase [EC:3.1.1.80]	gi|356572536|ref|XP_003554424.1|//PREDICTED: GDSL esterase/lipase At5g03610-like [Glycine max]
Aradu.I08Z6	4283	481.54	1932.99	-1.2519	5.88668e-83	Down	NA	GO:0016787//hydrolase activity;GO:0008568//microtubule-severing ATPase activity;GO:0008270//zinc ion binding;GO:0005488//binding	NA	K01074//palmitoyl-protein thioesterase [EC:3.1.2.22];K03363//cell division cycle 20, cofactor of APC complex;K10683//BRCA1-associated RING domain protein 1;K05658//ATP-binding cassette, subfamily B (MDR/TAP), member 1 [EC:3.6.3.44];K04733//interleukin-1 receptor-associated kinase 4 [EC:2.7.11.1];K02890//large subunit ribosomal protein L22;K17285//selenium-binding protein 1;K02259//cytochrome c ox…	gi|502152498|ref|XP_004508953.1|//PREDICTED: pentatricopeptide repeat-containing protein At4g16835, mitochondrial [Cicer arietinum];gi|225001253|gb|ACN78484.1|//putative RNA-directed DNA polymerase [Arachis hypogaea]
Aradu.I118N	2543	556.9	2156.13	-1.19975	1.83115e-86	Down	NA	NA	NA	NA	gi|571502834|ref|XP_003542023.2|//PREDICTED: uncharacterized protein LOC100785658 [Glycine max]
Aradu.I1CLH	1384	816.08	331	2.05509	1.00797e-119	Up	GO:0044424//intracellular part;GO:0005634//nucleus;GO:0005737//cytoplasm	NA	NA	K09510//DnaJ homolog subfamily B member 4;K09512//DnaJ homolog subfamily B member 6;K09514//DnaJ homolog subfamily B member 8	gi|596195785|ref|XP_007223572.1|//hypothetical protein PRUPE_ppa012272mg [Prunus persica];gi|388494500|gb|AFK35316.1|//unknown [Lotus japonicus]
Aradu.I1GRS	1139	3565.39	2347.96	1.35586	4.94978e-288	Up	NA	GO:0043565//sequence-specific DNA binding;GO:0003700//transcription factor activity, sequence-specific DNA binding	GO:0006355//regulation of transcription, DNA-templated	K13425//WRKY transcription factor 22	gi|951014630|ref|XP_014510614.1|//PREDICTED: probable WRKY transcription factor 17 [Vigna radiata var. radiata];gi|255645786|gb|ACU23385.1|//unknown [Glycine max]
Aradu.I27F7	1246	13	413.18	-4.23698	2.19429e-72	Down	GO:0016021//integral component of membrane;GO:0005886//plasma membrane	GO:0005385//zinc ion transmembrane transporter activity;GO:0016491//oxidoreductase activity	GO:0071577//zinc II ion transmembrane transport	K14709//solute carrier family 39 (zinc transporter), member 1/2/3	gi|593789530|ref|XP_007157804.1|//hypothetical protein PHAVU_002G099700g [Phaseolus vulgaris]
Aradu.I2A4P	816	146.67	33	2.90524	3.27559e-33	Up	NA	NA	NA	K13993//HSP20 family protein	gi|593694432|ref|XP_007147737.1|//hypothetical protein PHAVU_006G150600g [Phaseolus vulgaris]
Aradu.I2VY0	1700	17	312	-3.44473	4.23378e-48	Down	NA	NA	NA	NA	NA
Aradu.I3E1J	1192	169062	580032	-1.02537	0	Down	NA	NA	NA	K01206//alpha-L-fucosidase [EC:3.2.1.51]	gi|356529093|ref|XP_003533131.1|//PREDICTED: desiccation-related protein PCC13-62-like [Glycine max]
Aradu.I471F	949	5	69.76	-3.04919	5.34085e-11	Down	NA	NA	NA	NA	NA
Aradu.I4ITZ	1641	466	305	1.36473	2.16161e-39	Up	GO:0016020//membrane	NA	NA	NA	gi|440583723|emb|CCH47225.1|//hypothetical protein [Lupinus angustifolius]
Aradu.I55UR	1290	11	826	-5.47736	1.61508e-155	Down	NA	GO:0000166//nucleotide binding;GO:0004672//protein kinase activity	GO:0016310//phosphorylation	K04733//interleukin-1 receptor-associated kinase 4 [EC:2.7.11.1];K04730//interleukin-1 receptor-associated kinase 1 [EC:2.7.11.1];K07300//Ca2+:H+ antiporter	gi|502137085|ref|XP_004502962.1|//PREDICTED: proline-rich receptor-like protein kinase PERK14 [Cicer arietinum]
Aradu.I5L62	858	93.57	42.64	1.88705	9.41918e-14	Up	GO:0009507//chloroplast	NA	NA	K01859//chalcone isomerase [EC:5.5.1.6]	gi|922374974|ref|XP_003599575.2|//hypothetical protein MTR_3g035630 [Medicago truncatula]
Aradu.I62QK	1406	64286.3	40436.2	1.42207	0	Up	GO:0005737//cytoplasm	GO:0020037//heme binding;GO:0046872//metal ion binding;GO:0016688//L-ascorbate peroxidase activity	GO:0006979//response to oxidative stress;GO:0098869//cellular oxidant detoxification;GO:0042744//hydrogen peroxide catabolic process;GO:0055114//oxidation-reduction process	K00434//L-ascorbate peroxidase [EC:1.11.1.11]	gi|120969450|gb|ABM45856.1|//cytosolic ascorbate peroxidase [Arachis hypogaea]
Aradu.I7Y6M	1412	127.86	437.99	-1.02313	5.65365e-15	Down	GO:0016021//integral component of membrane;GO:0005737//cytoplasm	GO:0004820//glycine-tRNA ligase activity;GO:0005524//ATP binding	GO:0006426//glycyl-tRNA aminoacylation	K01880//glycyl-tRNA synthetase [EC:6.1.1.14]	gi|728841290|gb|KHG20733.1|//Glycine--tRNA ligase 1, mitochondrial -like protein [Gossypium arboreum];gi|743880400|ref|XP_011036186.1|//PREDICTED: glycine--tRNA ligase 1, mitochondrial [Populus euphratica]
Aradu.I8HGC	3180	110	1970.09	-3.40948	5.11956e-293	Down	GO:0016021//integral component of membrane	NA	NA	K03809//NAD(P)H dehydrogenase (quinone) [EC:1.6.5.2]	gi|734419125|gb|KHN39944.1|//hypothetical protein glysoja_043054 [Glycine soja]
Aradu.I9PC5	2039	431.12	332.67	1.1272	1.63125e-27	Up	NA	GO:0050356//tropine dehydrogenase activity;GO:0016491//oxidoreductase activity	GO:0055114//oxidation-reduction process	K08081//tropinone reductase I [EC:1.1.1.206]	gi|731392100|ref|XP_010650990.1|//PREDICTED: tropinone reductase homolog isoform X2 [Vitis vinifera];gi|388503756|gb|AFK39944.1|//unknown [Lotus japonicus]
Aradu.IFF56	902	70.38	56.57	1.06833	1.54379e-05	Up	NA	NA	GO:0006810//transport	NA	gi|965611468|dbj|BAT97607.1|//hypothetical protein VIGAN_09110600 [Vigna angularis var. angularis]
Aradu.IFQ8D	2009	7731.77	5854.63	1.15443	0	Up	GO:0044434//chloroplast part;GO:0016021//integral component of membrane	GO:0015131//oxaloacetate transmembrane transporter activity;GO:0015140//malate transmembrane transporter activity	GO:0071423//malate transmembrane transport;GO:0015729//oxaloacetate transport	K03319//divalent anion:Na+ symporter, DASS family	gi|356542068|ref|XP_003539493.1|//PREDICTED: dicarboxylate transporter 1, chloroplastic-like [Glycine max]
Aradu.IG70C	4080	239.36	857.35	-1.0875	1.9108e-30	Down	NA	GO:0016787//hydrolase activity	GO:0046856//phosphatidylinositol dephosphorylation	K00430//peroxidase [EC:1.11.1.7]	gi|734424397|gb|KHN42625.1|//Type I inositol-1,4,5-trisphosphate 5-phosphatase 2 [Glycine soja];gi|571487238|ref|XP_006590604.1|//PREDICTED: type I inositol polyphosphate 5-phosphatase 2-like [Glycine max]
Aradu.II75M	2024	436.23	304.73	1.27076	2.70002e-33	Up	NA	NA	NA	K10523//speckle-type POZ protein	gi|965658311|dbj|BAT74730.1|//hypothetical protein VIGAN_01246400 [Vigna angularis var. angularis]
Aradu.ILC9H	1596	50.03	408.38	-2.27584	1.9146e-41	Down	GO:0031248//protein acetyltransferase complex	GO:0004596//peptide alpha-N-acetyltransferase activity	GO:0006474//N-terminal protein amino acid acetylation	NA	gi|593267294|ref|XP_007135825.1|//hypothetical protein PHAVU_010G161500g [Phaseolus vulgaris]
Aradu.IM9AT	1976	24521.9	11517.4	1.84346	0	Up	GO:0016020//membrane	GO:0020037//heme binding;GO:0005506//iron ion binding;GO:0016710//trans-cinnamate 4-monooxygenase activity	GO:0044550//secondary metabolite biosynthetic process;GO:0055114//oxidation-reduction process;GO:0009808//lignin metabolic process	K00487//trans-cinnamate 4-monooxygenase [EC:1.14.13.11]	gi|343796371|gb|AEM63594.1|//cinnamate 4-hydroxylase [Leucaena leucocephala]
Aradu.IPH1G	1504	356.74	203.42	1.56362	4.75036e-37	Up	NA	NA	GO:0006351//transcription, DNA-templated	NA	gi|629097501|gb|KCW63266.1|//hypothetical protein EUGRSUZ_G00890 [Eucalyptus grandis];gi|951023330|ref|XP_014513154.1|//PREDICTED: B3 domain-containing transcription factor VRN1-like [Vigna radiata var. radiata];gi|947089527|gb|KRH38192.1|//hypothetical protein GLYMA_09G117200 [Glycine max]
Aradu.IR1JE	2714	45	311.13	-2.03631	5.07589e-28	Down	GO:0009506//plasmodesma;GO:0016021//integral component of membrane;GO:0005886//plasma membrane	GO:0030246//carbohydrate binding;GO:0005524//ATP binding;GO:0004674//protein serine/threonine kinase activity;GO:0031625//ubiquitin protein ligase binding	GO:0048544//recognition of pollen;GO:0006468//protein phosphorylation;GO:0045087//innate immune response	K04733//interleukin-1 receptor-associated kinase 4 [EC:2.7.11.1]	gi|571444627|ref|XP_006576562.1|//PREDICTED: G-type lectin S-receptor-like serine/threonine-protein kinase At1g11300 isoform X1 [Glycine max]
Aradu.IR1JZ	2218	240.67	130.66	1.63445	4.10359e-27	Up	NA	GO:0004049//anthranilate synthase activity	GO:0000162//tryptophan biosynthetic process	K01657//anthranilate synthase component I [EC:4.1.3.27]	gi|734412329|gb|KHN36387.1|//Anthranilate synthase component I-1, chloroplastic [Glycine soja]
Aradu.IR41I	1381	187.67	676.02	-1.09566	1.22964e-24	Down	NA	NA	NA	K12795//suppressor of G2 allele of SKP1	gi|947059411|gb|KRH08817.1|//hypothetical protein GLYMA_16G176200 [Glycine max];gi|356559728|ref|XP_003548149.1|//PREDICTED: protein SGT1 homolog [Glycine max]
Aradu.IS5GH	1483	342.85	263.86	1.13101	2.48306e-22	Up	NA	GO:0016747//transferase activity, transferring acyl groups other than amino-acyl groups	NA	K15400//omega-hydroxypalmitate O-feruloyl transferase [EC:2.3.1.188]	gi|356553771|ref|XP_003545226.1|//PREDICTED: omega-hydroxypalmitate O-feruloyl transferase-like [Glycine max]
Aradu.ISE5U	2377	923.51	3124.24	-1.0051	6.21234e-94	Down	NA	GO:0005524//ATP binding	NA	K14440//SWI/SNF-related matrix-associated actin-dependent regulator of chromatin subfamily A-like protein 1 [EC:3.6.4.12]	gi|1000966421|ref|XP_015574734.1|//PREDICTED: SWI/SNF-related matrix-associated actin-dependent regulator of chromatin subfamily A-like protein 1 [Ricinus communis];gi|947053039|gb|KRH02492.1|//hypothetical protein GLYMA_17G041700 [Glycine max]
Aradu.IV8SJ	1600	486.78	182.89	2.1655	6.99849e-77	Up	GO:0016020//membrane;GO:0005618//cell wall;GO:0005576//extracellular region	NA	GO:0009664//plant-type cell wall organization	K20628//expansin	gi|947039858|gb|KRG89582.1|//hypothetical protein GLYMA_20G033900 [Glycine max]
Aradu.IW0YD	2022	58.32	534.48	-2.44287	2.73856e-58	Down	GO:0016021//integral component of membrane;GO:0000139//Golgi membrane	GO:0008378//galactosyltransferase activity	GO:0006486//protein glycosylation	K20855//beta-1,3-galactosyltransferase 1/2/3/4/5/7/8 [EC:2.4.1.-]	gi|720073348|ref|XP_010278673.1|//PREDICTED: probable beta-1,3-galactosyltransferase 2 isoform X2 [Nelumbo nucifera];gi|955355165|ref|XP_014620511.1|//PREDICTED: probable beta-1,3-galactosyltransferase 2 isoform X1 [Glycine max]
Aradu.IW3RC	2002	216.76	738.38	-1.01506	8.27993e-24	Down	GO:0016021//integral component of membrane	GO:0008233//peptidase activity	GO:0006508//proteolysis	NA	gi|951050213|ref|XP_014520145.1|//PREDICTED: probable zinc metallopeptidase EGY3, chloroplastic [Vigna radiata var. radiata]
Aradu.IWT7W	904	14.85	68.7	-1.45664	2.61767e-05	Down	NA	NA	NA	NA	NA
Aradu.IZA6Y	1238	752.62	2837.54	-1.16144	1.12568e-107	Down	NA	GO:0046872//metal ion binding	NA	K10666//E3 ubiquitin-protein ligase RNF5 [EC:2.3.2.27]	gi|922335278|ref|XP_013445629.1|//E3 ubiquitin-protein ligase RMA1H1-like protein [Medicago truncatula]
Aradu.J17YE	3246	0	712	-9.72253	1.44366e-97	Down	NA	NA	NA	K11294//nucleolin	gi|342365835|gb|AEL30368.1|//hypothetical protein 205D04_8 [Arachis hypogaea]
Aradu.J1B8U	1595	86.32	357.19	-1.29572	1.677e-17	Down	NA	GO:0008270//zinc ion binding;GO:0016491//oxidoreductase activity	GO:0055114//oxidation-reduction process	K00121//S-(hydroxymethyl)glutathione dehydrogenase / alcohol dehydrogenase [EC:1.1.1.284 1.1.1.1]	gi|356501338|ref|XP_003519482.1|//PREDICTED: alcohol dehydrogenase-like 7 isoform X1 [Glycine max]
Aradu.J33DL	960	58.77	325.15	-1.71475	1.68681e-23	Down	GO:0009507//chloroplast	GO:0004497//monooxygenase activity;GO:0016984//ribulose-bisphosphate carboxylase activity	GO:0019253//reductive pentose-phosphate cycle;GO:0009853//photorespiration;GO:0055114//oxidation-reduction process	K01602//ribulose-bisphosphate carboxylase small chain [EC:4.1.1.39]	gi|540360866|gb|AGV08375.1|//ribulose-1,5-bisphosphate carboxylase/oxygenase small subunit [Arachis hypogaea]
Aradu.J4CTC	8515	113.99	2453.51	-3.67466	0	Down	GO:0005887//integral component of plasma membrane	GO:0005249//voltage-gated potassium channel activity	GO:0006813//potassium ion transport;GO:0034220//ion transmembrane transport;GO:0009987//cellular process;GO:0042391//regulation of membrane potential	K05391//cyclic nucleotide gated channel, other eukaryote	gi|297745428|emb|CBI40508.3|//unnamed protein product [Vitis vinifera]
Aradu.J4K6H	2015	30.01	274.43	-2.43972	1.10568e-30	Down	GO:0016020//membrane;GO:0005794//Golgi apparatus	GO:0008417//fucosyltransferase activity	GO:0009969//xyloglucan biosynthetic process;GO:0009832//plant-type cell wall biogenesis	K13681//xyloglucan fucosyltransferase [EC:2.4.1.-]	gi|571472578|ref|XP_006585650.1|//PREDICTED: probable fucosyltransferase 7 [Glycine max];gi|734379235|gb|KHN22399.1|//hypothetical protein glysoja_024908 [Glycine soja]
Aradu.J4KU5	1805	17.99	202.63	-2.74037	5.05274e-26	Down	GO:0016021//integral component of membrane	GO:0015238//drug transmembrane transporter activity;GO:0015297//antiporter activity	GO:0006855//drug transmembrane transport	K03327//multidrug resistance protein, MATE family	gi|965605406|dbj|BAT92582.1|//hypothetical protein VIGAN_07133700 [Vigna angularis var. angularis];gi|502088103|ref|XP_004488731.1|//PREDICTED: MATE efflux family protein ALF5-like [Cicer arietinum]
Aradu.J54B1	1207	107	417	-1.20923	2.94993e-18	Down	NA	NA	NA	K09667//protein O-GlcNAc transferase [EC:2.4.1.255]	gi|828287104|ref|XP_012567970.1|//PREDICTED: uncharacterized protein LOC101504946 [Cicer arietinum]
Aradu.J5XVH	1336	160.72	84.51	1.68056	2.40414e-19	Up	NA	NA	NA	K14505//cyclin D3, plant	gi|89111299|dbj|BAE80324.1|//cyclin D3-1 [Camellia sinensis]
Aradu.J6DQU	1018	58.88	216.24	-1.12358	2.51708e-09	Down	NA	NA	NA	K11296//high mobility group protein B3	gi|828295917|ref|XP_012568548.1|//PREDICTED: high mobility group B protein 7 [Cicer arietinum]
Aradu.J6GHV	1173	1498.14	1248.54	1.01614	1.40191e-77	Up	NA	NA	NA	K05747//Wiskott-Aldrich syndrome protein	gi|356495033|ref|XP_003516385.1|//PREDICTED: ninja-family protein AFP3-like [Glycine max]
Aradu.J6I5C	1408	44	928.12	-3.64553	3.87031e-146	Down	GO:0005829//cytosol;GO:0009507//chloroplast	GO:0004489//methylenetetrahydrofolate reductase (NAD(P)H) activity;GO:0004852//uroporphyrinogen-III synthase activity	GO:0033014//tetrapyrrole biosynthetic process;GO:0006730//one-carbon metabolic process;GO:0006780//uroporphyrinogen III biosynthetic process;GO:0055114//oxidation-reduction process	K01719//uroporphyrinogen-III synthase [EC:4.2.1.75]	gi|922382970|ref|XP_013461708.1|//uroporphyrinogen III synthase [Medicago truncatula];gi|502132940|ref|XP_004501590.1|//PREDICTED: uroporphyrinogen-III synthase, chloroplastic [Cicer arietinum]
Aradu.J6ZTL	3217	2	2799	-9.69749	0	Down	NA	NA	NA	K10624//E3 ubiquitin-protein ligase RBBP6 [EC:2.3.2.27]	gi|697189438|ref|XP_009603775.1|//PREDICTED: B3 domain-containing protein At1g49475-like [Nicotiana tomentosiformis];gi|802582030|ref|XP_012070021.1|//PREDICTED: E3 ubiquitin-protein ligase RBBP6-like [Jatropha curcas]
Aradu.J75FD	691	18	287	-3.24178	3.00039e-42	Down	NA	NA	NA	K02212//DNA replication licensing factor MCM4 [EC:3.6.4.12]	gi|356538731|ref|XP_003537854.1|//PREDICTED: DNA replication licensing factor MCM4-like [Glycine max]
Aradu.J7JER	1460	242.85	142.95	1.51776	1.00772e-24	Up	GO:0005829//cytosol;GO:0005886//plasma membrane	GO:0004459//L-lactate dehydrogenase activity	GO:0019752//carboxylic acid metabolic process;GO:0005975//carbohydrate metabolic process;GO:0055114//oxidation-reduction process	K00016//L-lactate dehydrogenase [EC:1.1.1.27]	gi|357476891|ref|XP_003608731.1|//L-lactate dehydrogenase A-like protein [Medicago truncatula]
Aradu.J8VZJ	2335	662.62	356.03	1.64939	1.08624e-72	Up	NA	GO:0046556//alpha-L-arabinofuranosidase activity;GO:0016798//hydrolase activity, acting on glycosyl bonds	GO:0046373//L-arabinose metabolic process	K01209//alpha-N-arabinofuranosidase [EC:3.2.1.55]	gi|593697162|ref|XP_007149063.1|//hypothetical protein PHAVU_005G037800g [Phaseolus vulgaris];gi|828299626|ref|XP_012569208.1|//PREDICTED: LOW QUALITY PROTEIN: alpha-L-arabinofuranosidase 1-like [Cicer arietinum]
Aradu.J9JP2	795	2939.11	653.68	2.92193	0	Up	GO:0010287//plastoglobule;GO:0009535//chloroplast thylakoid membrane;GO:0009523//photosystem II;GO:0016021//integral component of membrane;GO:0009941//chloroplast envelope;GO:0009522//photosystem I	GO:0031409//pigment binding;GO:0046872//metal ion binding;GO:0016168//chlorophyll binding	GO:0009768//photosynthesis, light harvesting in photosystem I;GO:0009416//response to light stimulus;GO:0018298//protein-chromophore linkage	K08912//light-harvesting complex II chlorophyll a/b binding protein 1	gi|947059263|gb|KRH08669.1|//hypothetical protein GLYMA_16G165200 [Glycine max]
Aradu.JA0HW	3617	204.96	807.59	-1.22507	1.80908e-34	Down	GO:0016021//integral component of membrane	GO:0016709//oxidoreductase activity, acting on paired donors, with incorporation or reduction of molecular oxygen, NAD(P)H as one donor, and incorporation of one atom of oxygen;GO:0020037//heme binding;GO:0005506//iron ion binding	GO:0044550//secondary metabolite biosynthetic process;GO:0055114//oxidation-reduction process	K00512//steroid 17alpha-monooxygenase / 17alpha-hydroxyprogesterone deacetylase [EC:1.14.14.19 1.14.14.32]	gi|823224587|ref|XP_012445065.1|//PREDICTED: LOW QUALITY PROTEIN: uncharacterized protein LOC105769156 [Gossypium raimondii]
Aradu.JAF9B	2089	367.74	216.15	1.51986	1.1781e-36	Up	GO:0016020//membrane;GO:0016021//integral component of membrane	GO:0016740//transferase activity	NA	K20889//probable glucuronoxylan glucuronosyltransferase IRX7 [EC2.4.1.-]	gi|356541948|ref|XP_003539434.1|//PREDICTED: probable glucuronoxylan glucuronosyltransferase IRX7 [Glycine max];gi|734376924|gb|KHN21487.1|//Putative glucuronoxylan glucuronosyltransferase IRX7 [Glycine soja]
Aradu.JAU4D	468	35.8	20	1.59317	2.57063e-05	Up	NA	NA	NA	NA	gi|734370286|gb|KHN19228.1|//hypothetical protein glysoja_041580 [Glycine soja]
Aradu.JB1F3	1783	3155.49	2537	1.06795	2.65213e-175	Up	GO:0043229//intracellular organelle;GO:0044444//cytoplasmic part	GO:0016740//transferase activity	NA	K00627//pyruvate dehydrogenase E2 component (dihydrolipoamide acetyltransferase) [EC:2.3.1.12]	gi|951015379|ref|XP_014510829.1|//PREDICTED: dihydrolipoyllysine-residue acetyltransferase component 5 of pyruvate dehydrogenase complex, chloroplastic [Vigna radiata var. radiata]
Aradu.JBN5K	1610	358.85	1549.68	-1.35731	1.62254e-75	Down	NA	NA	NA	K17046//protein DEK;K14826//FK506-binding nuclear protein [EC:5.2.1.8]	gi|823242820|ref|XP_012454073.1|//PREDICTED: mediator-associated protein 1-like [Gossypium raimondii]
Aradu.JD2JG	567	7	40	-1.76137	0.000188358	Down	NA	NA	NA	NA	NA
Aradu.JD5ZU	1345	130.16	452.19	-1.04344	7.4303e-16	Down	NA	NA	NA	K18726//FAS-associated factor 2	gi|356522648|ref|XP_003529958.1|//PREDICTED: plant UBX domain-containing protein 13 [Glycine max];gi|658037831|ref|XP_008354468.1|//PREDICTED: uncharacterized protein LOC103418097 [Malus domestica]
Aradu.JFD8S	1500	661.95	2640.43	-1.24277	1.77563e-111	Down	NA	GO:0080130//L-phenylalanine:2-oxoglutarate aminotransferase activity;GO:0004838//L-tyrosine:2-oxoglutarate aminotransferase activity;GO:0030170//pyridoxal phosphate binding	GO:0010189//vitamin E biosynthetic process;GO:0006520//cellular amino acid metabolic process	K00815//tyrosine aminotransferase [EC:2.6.1.5]	gi|351726492|ref|NP_001238408.1|//tyrosine aminotransferase [Glycine max]
Aradu.JG747	4638	459.07	154.61	2.32329	5.69251e-79	Up	GO:0005634//nucleus;GO:0009295//nucleoid;GO:0009330//DNA topoisomerase complex (ATP-hydrolyzing)	GO:0003677//DNA binding;GO:0046872//metal ion binding;GO:0005524//ATP binding;GO:0003918//DNA topoisomerase type II (ATP-hydrolyzing) activity	GO:0000819//sister chromatid segregation;GO:0000712//resolution of meiotic recombination intermediates;GO:0006268//DNA unwinding involved in DNA replication;GO:0006312//mitotic recombination;GO:0044774//mitotic DNA integrity checkpoint;GO:0006265//DNA topological change	K03164//DNA topoisomerase II [EC:5.99.1.3]	gi|356555329|ref|XP_003545986.1|//PREDICTED: DNA topoisomerase 2-like [Glycine max]
Aradu.JG8Q0	790	21.36	136.9	-1.92693	1.85459e-12	Down	NA	NA	GO:0006810//transport	K20471//coatomer subunit delta	gi|734347599|gb|KHN11457.1|//Coatomer subunit delta [Glycine soja]
Aradu.JH5EZ	835	529	361	1.30448	1.27578e-41	Up	NA	NA	NA	NA	NA
Aradu.JI62L	982	1576.89	1256.9	1.08042	5.05615e-90	Up	NA	GO:0016597//amino acid binding;GO:0046983//protein dimerization activity	GO:0008152//metabolic process	NA	gi|194466187|gb|ACF74324.1|//unknown [Arachis hypogaea]
Aradu.JJ52W	632	9.88	56.35	-1.75863	1.37019e-05	Down	GO:0005634//nucleus;GO:0030529//intracellular ribonucleoprotein complex	GO:0003723//RNA binding	NA	K11086//small nuclear ribonucleoprotein B and B'	gi|593532134|ref|XP_007142248.1|//hypothetical protein PHAVU_008G264900g [Phaseolus vulgaris]
Aradu.JK25B	877	109.35	57.4	1.68304	1.00295e-13	Up	NA	NA	NA	NA	gi|359807476|ref|NP_001241396.1|//uncharacterized protein LOC100801492 precursor [Glycine max]
Aradu.JLM18	1714	168.12	602.6	-1.0885	6.36353e-22	Down	GO:0009705//plant-type vacuole membrane;GO:0016021//integral component of membrane	GO:0022891//substrate-specific transmembrane transporter activity	GO:0055085//transmembrane transport	K08150//MFS transporter, SP family, solute carrier family 2 (myo-inositol transporter), member 13	gi|356576905|ref|XP_003556570.1|//PREDICTED: inositol transporter 1-like isoform X1 [Glycine max]
Aradu.JLN7Z	3298	146.32	689.05	-1.48228	3.78049e-39	Down	GO:0016021//integral component of membrane	GO:0032440//2-alkenal reductase [NAD(P)] activity;GO:0004674//protein serine/threonine kinase activity;GO:0005524//ATP binding	GO:0006468//protein phosphorylation;GO:0055114//oxidation-reduction process	K00924;K17422//large subunit ribosomal protein L41;K13420//LRR receptor-like serine/threonine-protein kinase FLS2 [EC:2.7.11.1]	gi|920698217|gb|KOM41442.1|//hypothetical protein LR48_Vigan04g164000 [Vigna angularis]
Aradu.JM7KB	1503	22.45	170.22	-2.16941	2.70421e-17	Down	GO:0016020//membrane	GO:0090447//glycerol-3-phosphate 2-O-acyltransferase activity;GO:0016791//phosphatase activity	GO:0010143//cutin biosynthetic process;GO:0016311//dephosphorylation	K13508//glycerol-3-phosphate acyltransferase [EC:2.3.1.15]	gi|356503944|ref|XP_003520759.1|//PREDICTED: probable glycerol-3-phosphate acyltransferase 2 [Glycine max]
Aradu.JML4I	660	25.65	103.72	-1.26246	4.3671e-06	Down	NA	GO:0016787//hydrolase activity	NA	K08233//polyneuridine-aldehyde esterase [EC:3.1.1.78]	gi|734312419|gb|KHN00597.1|//Polyneuridine-aldehyde esterase [Glycine soja]
Aradu.JP0ZJ	2258	104.27	590.76	-1.74904	1.85088e-42	Down	GO:0016021//integral component of membrane	GO:0005215//transporter activity	GO:0006810//transport	K14638//solute carrier family 15 (peptide/histidine transporter), member 3/4	gi|593264988|ref|XP_007134672.1|//hypothetical protein PHAVU_010G066200g [Phaseolus vulgaris]
Aradu.JPL2X	4719	234.73	2005.73	-2.34185	3.51775e-204	Down	GO:0016021//integral component of membrane	GO:0005524//ATP binding;GO:0042626//ATPase activity, coupled to transmembrane movement of substances	GO:0055085//transmembrane transport	K05666//ATP-binding cassette, subfamily C (CFTR/MRP), member 2	gi|947059358|gb|KRH08764.1|//hypothetical protein GLYMA_16G172600 [Glycine max];gi|955376531|ref|XP_014624584.1|//PREDICTED: ABC transporter C family member 10-like isoform X1 [Glycine max]
Aradu.JR4KW	1654	5186.94	4214.13	1.05286	1.09955e-280	Up	GO:0016020//membrane;GO:0045298//tubulin complex;GO:0005874//microtubule;GO:0005794//Golgi apparatus	GO:0005515//protein binding;GO:0005525//GTP binding;GO:0005200//structural constituent of cytoskeleton;GO:0003924//GTPase activity	GO:0009651//response to salt stress;GO:0007017//microtubule-based process	K07375//tubulin beta	gi|657944997|ref|XP_008377500.1|//PREDICTED: tubulin beta-1 chain [Malus domestica]
Aradu.JS9G3	1378	1540.59	1294.01	1.00484	2.63991e-78	Up	GO:0016021//integral component of membrane;GO:0005789//endoplasmic reticulum membrane	GO:0016787//hydrolase activity	GO:0006810//transport	K20352//p24 family protein delta-1	gi|955356623|ref|XP_014620834.1|//PREDICTED: transmembrane emp24 domain-containing protein p24delta4-like [Glycine max]
Aradu.JT1K4	1950	628.63	2150.29	-1.02104	8.19854e-67	Down	NA	GO:0016788//hydrolase activity, acting on ester bonds	GO:0008152//metabolic process	K01114//phospholipase C [EC:3.1.4.3]	gi|951008278|ref|XP_014508964.1|//PREDICTED: non-specific phospholipase C2 [Vigna radiata var. radiata]
Aradu.JU93B	513	16.82	75.49	-1.4129	1.72178e-05	Down	GO:0016021//integral component of membrane	GO:0005384//manganese ion transmembrane transporter activity;GO:0005381//iron ion transmembrane transporter activity	GO:0071421//manganese ion transmembrane transport;GO:0030026//cellular manganese ion homeostasis;GO:0006880//intracellular sequestering of iron ion;GO:0071281//cellular response to iron ion	K00430//peroxidase [EC:1.11.1.7]	gi|955319019|ref|XP_014630848.1|//PREDICTED: nodulin-21 isoform X1 [Glycine max]
Aradu.JUQ26	1170	292.55	229.06	1.10616	1.1133e-18	Up	GO:0005634//nucleus;GO:0005622//intracellular;GO:0005737//cytoplasm	GO:0032440//2-alkenal reductase [NAD(P)] activity;GO:0043424//protein histidine kinase binding;GO:0004871//signal transducer activity;GO:0009927//histidine phosphotransfer kinase activity	GO:0010089//xylem development;GO:0016310//phosphorylation;GO:0009736//cytokinin-activated signaling pathway;GO:0000160//phosphorelay signal transduction system;GO:0055114//oxidation-reduction process	K14490//histidine-containing phosphotransfer peotein	gi|920680426|gb|KOM27291.1|//hypothetical protein LR48_Vigan406s010100, partial [Vigna angularis];gi|593267158|ref|XP_007135757.1|//hypothetical protein PHAVU_010G156100g [Phaseolus vulgaris]
Aradu.JV6J2	703	0	188.72	-7.8069	1.80425e-33	Down	NA	NA	NA	K08081//tropinone reductase I [EC:1.1.1.206]	NA
Aradu.JXY3D	696	93.36	575.16	-1.86988	3.3831e-45	Down	NA	NA	NA	K05747//Wiskott-Aldrich syndrome protein;K11137//telomere length regulation protein	gi|723746793|ref|XP_010313594.1|//PREDICTED: basic proline-rich protein, partial [Solanum lycopersicum]
Aradu.JZ1T7	540	8	58	-2.10477	8.4791e-07	Down	NA	NA	NA	NA	NA
Aradu.JZ8MY	2835	469.72	361.74	1.13005	6.06585e-30	Up	NA	GO:0004372//glycine hydroxymethyltransferase activity;GO:0008168//methyltransferase activity;GO:0030170//pyridoxal phosphate binding	GO:0006544//glycine metabolic process;GO:0035999//tetrahydrofolate interconversion;GO:0032259//methylation;GO:0006563//L-serine metabolic process	K00600//glycine hydroxymethyltransferase [EC:2.1.2.1]	gi|356518509|ref|XP_003527921.1|//PREDICTED: serine hydroxymethyltransferase 7-like [Glycine max];gi|922375522|ref|XP_003601141.2|//serine transhydroxymethyltransferase [Medicago truncatula]
Aradu.JZZ9Y	1071	1052.35	6308.25	-1.83042	0	Down	NA	NA	NA	K17046//protein DEK	gi|947107429|gb|KRH55812.1|//hypothetical protein GLYMA_06G283900 [Glycine max];gi|502082448|ref|XP_004487170.1|//PREDICTED: seed biotin-containing protein SBP65 [Cicer arietinum]
Aradu.K04P6	1245	52.01	644.14	-2.87731	3.93239e-83	Down	GO:0005739//mitochondrion;GO:0009941//chloroplast envelope	GO:0008237//metallopeptidase activity;GO:0005524//ATP binding;GO:0004222//metalloendopeptidase activity;GO:0000166//nucleotide binding;GO:0008124//4-alpha-hydroxytetrahydrobiopterin dehydratase activity;GO:0004176//ATP-dependent peptidase activity	GO:0006508//proteolysis;GO:0006729//tetrahydrobiopterin biosynthetic process	K01724//4a-hydroxytetrahydrobiopterin dehydratase [EC:4.2.1.96]	gi|965604457|dbj|BAT91633.1|//hypothetical protein VIGAN_07024100 [Vigna angularis var. angularis];gi|734305808|gb|KHM98725.1|//ATP-dependent zinc metalloprotease FtsH [Glycine soja];gi|947094390|gb|KRH42975.1|//hypothetical protein GLYMA_08G123200 [Glycine max];gi|920701262|gb|KOM44487.1|//hypothetical protein LR48_Vigan05g209200 [Vigna angularis]
Aradu.K0FM3	513	90.32	43.2	1.81722	9.41067e-13	Up	GO:0016020//membrane;GO:0009579//thylakoid;GO:0009507//chloroplast	GO:0046872//metal ion binding	NA	K02638//plastocyanin	gi|734406057|gb|KHN33826.1|//Plastocyanin, chloroplastic [Glycine soja]
Aradu.K17GR	516	34	10	2.51874	5.86667e-08	Up	NA	NA	NA	NA	NA
Aradu.K1BYW	698	106	58.97	1.59922	1.55666e-12	Up	NA	NA	NA	K16904//dCTP diphosphatase [EC:3.6.1.12]	gi|947108545|gb|KRH56871.1|//hypothetical protein GLYMA_05G023900 [Glycine max]
Aradu.K1LWM	3156	2073.31	1422.16	1.29706	4.35245e-157	Up	GO:0016020//membrane;GO:0009506//plasmodesma;GO:0016021//integral component of membrane;GO:0005886//plasma membrane	GO:0030246//carbohydrate binding;GO:0005524//ATP binding;GO:0004674//protein serine/threonine kinase activity;GO:0004672//protein kinase activity	GO:0016310//phosphorylation;GO:0006952//defense response;GO:0048544//recognition of pollen;GO:0006468//protein phosphorylation	K04733//interleukin-1 receptor-associated kinase 4 [EC:2.7.11.1]	gi|922386890|ref|XP_003597066.2|//S-locus lectin kinase family protein [Medicago truncatula];gi|356547043|ref|XP_003541927.1|//PREDICTED: G-type lectin S-receptor-like serine/threonine-protein kinase At4g03230 isoform X1 [Glycine max]
Aradu.K1NNF	4092	576.04	417.25	1.21846	8.95921e-41	Up	GO:0016021//integral component of membrane	GO:0005524//ATP binding;GO:0004672//protein kinase activity	GO:0006468//protein phosphorylation	K00924;K20718//LRR receptor-like serine/threonine-protein kinase ERECTA [EC:2.7.11.1];K04730//interleukin-1 receptor-associated kinase 1 [EC:2.7.11.1]	gi|571507111|ref|XP_006595805.1|//PREDICTED: probable inactive receptor kinase At5g10020 isoform X2 [Glycine max];gi|734416559|gb|KHN38438.1|//Putative inactive receptor kinase [Glycine soja];gi|955308990|ref|XP_014625709.1|//PREDICTED: probable inactive receptor kinase At5g10020 isoform X2 [Glycine max]
Aradu.K1WXQ	617	216.57	162.78	1.16512	2.33562e-15	Up	NA	NA	NA	NA	NA
Aradu.K23U3	1692	599.74	472.56	1.09705	4.34712e-36	Up	NA	GO:0016597//amino acid binding;GO:0016779//nucleotidyltransferase activity	GO:0008152//metabolic process	NA	gi|593790756|ref|XP_007158417.1|//hypothetical protein PHAVU_002G151300g [Phaseolus vulgaris];gi|356540171|ref|XP_003538563.1|//PREDICTED: ACT domain-containing protein ACR8-like [Glycine max]
Aradu.K2F98	2068	11701.4	5564.34	1.82561	0	Up	GO:0005874//microtubule;GO:0005737//cytoplasm	GO:0005525//GTP binding;GO:0005200//structural constituent of cytoskeleton;GO:0003924//GTPase activity	GO:0007017//microtubule-based process	K07374//tubulin alpha	gi|672128539|ref|XP_008787760.1|//PREDICTED: tubulin alpha chain-like [Phoenix dactylifera]
Aradu.K2QKB	533	135.18	631.66	-1.47106	1.22341e-35	Down	NA	NA	NA	K07466//replication factor A1	NA
Aradu.K2XX4	1590	128	537	-1.31557	4.8391e-26	Down	NA	GO:0004674//protein serine/threonine kinase activity;GO:0005524//ATP binding	GO:0006468//protein phosphorylation	K08864//tousled-like kinase [EC:2.7.11.1];K10706//senataxin [EC:3.6.4.-]	gi|702474580|ref|XP_010031602.1|//PREDICTED: serine/threonine-protein kinase TOUSLED isoform X2 [Eucalyptus grandis];gi|702474589|ref|XP_010031605.1|//PREDICTED: serine/threonine-protein kinase TOUSLED isoform X5 [Eucalyptus grandis];gi|702474577|ref|XP_010031601.1|//PREDICTED: serine/threonine-protein kinase TOUSLED isoform X1 [Eucalyptus grandis]
Aradu.K3FG8	1994	131.17	446.64	-1.01447	4.76426e-15	Down	NA	NA	GO:0009793//embryo development ending in seed dormancy	K19323//ataxin-10	gi|920694120|gb|KOM37345.1|//hypothetical protein LR48_Vigan03g072600 [Vigna angularis]
Aradu.K3I53	697	0	35.24	-5.38594	3.24575e-08	Down	GO:0016021//integral component of membrane	GO:0005215//transporter activity	GO:0006810//transport;GO:0042981//regulation of apoptotic process	K08360//cytochrome b-561 [EC:1.16.5.1];K14638//solute carrier family 15 (peptide/histidine transporter), member 3/4	gi|828287329|ref|XP_004486281.2|//PREDICTED: protein NRT1/ PTR FAMILY 4.5-like [Cicer arietinum];gi|658061422|ref|XP_008366580.1|//PREDICTED: uncharacterized protein LOC103430221 [Malus domestica]
Aradu.K3W2X	1421	161.23	114.13	1.25165	4.35794e-13	Up	NA	NA	NA	NA	gi|356570388|ref|XP_003553371.1|//PREDICTED: uncharacterized protein LOC100803801 [Glycine max]
Aradu.K49J7	857	46	4	4.27677	5.38773e-15	Up	NA	GO:0005488//binding	GO:0044260//cellular macromolecule metabolic process;GO:0006355//regulation of transcription, DNA-templated;GO:0044238//primary metabolic process;GO:0016573//histone acetylation	K08869//aarF domain-containing kinase;K17613//calcineurin-binding protein cabin-1	gi|955327970|ref|XP_014632752.1|//PREDICTED: myb-like protein J [Glycine max]
Aradu.K52XK	1405	3283.57	11319.7	-1.03229	0	Down	GO:0016020//membrane;GO:0016021//integral component of membrane	GO:0051119//sugar transmembrane transporter activity	GO:0008643//carbohydrate transport;GO:0034219//carbohydrate transmembrane transport	K15382//solute carrier family 50 (sugar transporter)	gi|593328194|ref|XP_007137524.1|//hypothetical protein PHAVU_009G134300g [Phaseolus vulgaris]
Aradu.K60K0	1543	1652.55	1145.54	1.28187	2.8796e-123	Up	NA	GO:0004471//malate dehydrogenase (decarboxylating) (NAD+) activity;GO:0046872//metal ion binding;GO:0051287//NAD binding	GO:0055114//oxidation-reduction process;GO:0006108//malate metabolic process	K00028//malate dehydrogenase (decarboxylating) [EC:1.1.1.39]	gi|734322701|gb|KHN04643.1|//NAD-dependent malic enzyme 59 kDa isoform, mitochondrial [Glycine soja];gi|747044982|ref|XP_011091799.1|//PREDICTED: NAD-dependent malic enzyme 59 kDa isoform, mitochondrial [Sesamum indicum];gi|951036582|ref|XP_014516659.1|//PREDICTED: NAD-dependent malic enzyme 59 kDa isoform, mitochondrial-like [Vigna radiata var. radiata];gi|734391663|gb|KHN27303.1|//NAD-dependent…
Aradu.K7LGT	1460	8672.04	37848	-1.37257	0	Down	NA	NA	NA	NA	gi|950944633|ref|XP_014494067.1|//PREDICTED: uncharacterized protein LOC106756243 [Vigna radiata var. radiata]
Aradu.K7RRB	1446	14.39	145.3	-2.58269	4.75537e-18	Down	GO:0016592//mediator complex	GO:0001104//RNA polymerase II transcription cofactor activity	GO:0006357//regulation of transcription from RNA polymerase II promoter	K05909//laccase [EC:1.10.3.2];K15164//mediator of RNA polymerase II transcription subunit 13	gi|593801618|ref|XP_007163846.1|//hypothetical protein PHAVU_001G269300g [Phaseolus vulgaris]
Aradu.K83YT	798	1.04	91.97	-5.7133	8.18625e-19	Down	NA	NA	NA	NA	NA
Aradu.K93AE	1575	509.11	313.38	1.45327	5.43367e-47	Up	GO:0043231//intracellular membrane-bounded organelle	GO:0080043//quercetin 3-O-glucosyltransferase activity;GO:0080044//quercetin 7-O-glucosyltransferase activity	GO:0009813//flavonoid biosynthetic process;GO:0052696//flavonoid glucuronidation	K13496//UDP-glucosyl transferase 73C [EC:2.4.1.-]	gi|356572494|ref|XP_003554403.1|//PREDICTED: UDP-glycosyltransferase 73C2-like [Glycine max]
Aradu.K9FS5	3059	306.54	1354.72	-1.39064	1.19833e-68	Down	GO:0005634//nucleus	GO:0005524//ATP binding;GO:0008568//microtubule-severing ATPase activity	GO:0031122//cytoplasmic microtubule organization	K13254//spastin [EC:3.6.4.3];K03231//elongation factor 1-alpha;K07767//katanin p60 ATPase-containing subunit A1 [EC:3.6.4.3]	gi|734363715|gb|KHN16776.1|//Putative AAA domain-containing protein C24B10.10c [Glycine soja];gi|951003354|ref|XP_014507578.1|//PREDICTED: uncharacterized AAA domain-containing protein C16E9.10c-like [Vigna radiata var. radiata]
Aradu.KAB2Z	603	45.79	257.09	-1.73596	3.14565e-19	Down	GO:0016021//integral component of membrane	NA	GO:0009269//response to desiccation	NA	gi|312599841|gb|ADQ91846.1|//late embryogenesis abundant protein group 7 protein [Arachis hypogaea]
Aradu.KD0CV	1859	0	351.3	-8.70335	1.29595e-55	Down	GO:0016020//membrane;GO:0016021//integral component of membrane	NA	NA	K14794//ribosomal RNA-processing protein 12	gi|947091058|gb|KRH39723.1|//hypothetical protein GLYMA_09G216300 [Glycine max];gi|356495264|ref|XP_003516499.1|//PREDICTED: protein NUCLEAR FUSION DEFECTIVE 4-like [Glycine max]
Aradu.KD7Y3	676	163	10	4.78001	3.11632e-51	Up	NA	NA	NA	NA	NA
Aradu.KF6LM	1329	573.6	2054.02	-1.08713	1.28327e-70	Down	NA	GO:0050661//NADP binding;GO:0004499//N,N-dimethylaniline monooxygenase activity;GO:0050660//flavin adenine dinucleotide binding	GO:0055114//oxidation-reduction process	K00485//dimethylaniline monooxygenase (N-oxide forming) [EC:1.14.13.8]	gi|571489272|ref|XP_006591168.1|//PREDICTED: flavin-containing monooxygenase FMO GS-OX-like 3 isoform X1 [Glycine max]
Aradu.KGX2I	1920	84.45	352.57	-1.30853	1.54565e-17	Down	NA	NA	NA	NA	gi|955376836|ref|XP_014624654.1|//PREDICTED: protein WEAK CHLOROPLAST MOVEMENT UNDER BLUE LIGHT 1 isoform X1 [Glycine max]
Aradu.KH3I5	860	104.56	84.74	1.05642	2.57219e-07	Up	GO:0009535//chloroplast thylakoid membrane;GO:0009570//chloroplast stroma	NA	GO:0010275//NAD(P)H dehydrogenase complex assembly	NA	gi|351721889|ref|NP_001236201.1|//uncharacterized protein LOC100526934 [Glycine max]
Aradu.KH972	2004	518.07	238.04	1.87515	4.94864e-68	Up	NA	GO:0050392//vicianin beta-glucosidase activity	GO:0016052//carbohydrate catabolic process	K01188//beta-glucosidase [EC:3.2.1.21]	gi|357457465|ref|XP_003599013.1|//glycoside hydrolase family 1 protein [Medicago truncatula]
Aradu.KHJ4B	962	842.25	2842.71	-1.00174	3.81369e-85	Down	GO:0005737//cytoplasm	GO:0016740//transferase activity	GO:0009072//aromatic amino acid family metabolic process	K01800//maleylacetoacetate isomerase [EC:5.2.1.2]	gi|356496394|ref|XP_003517053.1|//PREDICTED: glutathione S-transferase zeta class isoform X1 [Glycine max]
Aradu.KI3D9	303	14	0	5.56056	4.58672e-06	Up	GO:0015935//small ribosomal subunit;GO:0009507//chloroplast	GO:0003735//structural constituent of ribosome;GO:0019843//rRNA binding	GO:0006412//translation	K02954//small subunit ribosomal protein S14	gi|966202915|ref|YP_009193072.1|//ribosomal protein S14 (chloroplast) [Inga leiocalycina]
Aradu.KJH8E	1832	181.79	835.14	-1.44654	1.8002e-45	Down	GO:0016021//integral component of membrane	GO:0016709//oxidoreductase activity, acting on paired donors, with incorporation or reduction of molecular oxygen, NAD(P)H as one donor, and incorporation of one atom of oxygen;GO:0020037//heme binding;GO:0005506//iron ion binding	GO:0044550//secondary metabolite biosynthetic process;GO:0055114//oxidation-reduction process	K20618//cytochrome P450 family 76 subfamily A	gi|357445155|ref|XP_003592855.1|//cytochrome P450 family protein [Medicago truncatula]
Aradu.KJM0J	900	38.88	163.92	-1.32269	3.54996e-09	Down	GO:0005634//nucleus	GO:0003677//DNA binding;GO:0008138//protein tyrosine/serine/threonine phosphatase activity;GO:0046983//protein dimerization activity	GO:0010374//stomatal complex development;GO:0006470//protein dephosphorylation	K20558//transcription factor SPEECHLESS	gi|356557885|ref|XP_003547240.1|//PREDICTED: transcription factor MUTE-like [Glycine max]
Aradu.KL2T4	1242	133.09	79.57	1.49531	4.97798e-14	Up	NA	NA	NA	NA	NA
Aradu.KL56H	1794	1	384.03	-7.83187	2.85146e-66	Down	NA	NA	NA	K05747//Wiskott-Aldrich syndrome protein;K15178//RNA polymerase-associated protein RTF1;K06630//14-3-3 protein epsilon	gi|955353316|ref|XP_014620085.1|//PREDICTED: syndetin-like isoform X5 [Glycine max]
Aradu.KL6KV	1444	9208	7306	1.08701	0	Up	NA	GO:0005488//binding	GO:0048856//anatomical structure development;GO:0009987//cellular process;GO:0044767//single-organism developmental process	K09338//homeobox-leucine zipper protein	gi|593785307|ref|XP_007155694.1|//hypothetical protein PHAVU_003G223200g [Phaseolus vulgaris]
Aradu.KM1Q8	972	25	182	-2.11073	8.27257e-18	Down	NA	NA	NA	K14499//BRI1 kinase inhibitor 1	gi|593268994|ref|XP_007136674.1|//hypothetical protein PHAVU_009G064300g [Phaseolus vulgaris]
Aradu.KR62J	765	36.05	128.25	-1.07768	6.52007e-06	Down	NA	NA	NA	NA	gi|388493994|gb|AFK35063.1|//unknown [Lotus japonicus]
Aradu.KV1RH	1373	128.19	466.04	-1.10896	8.20402e-18	Down	GO:0009535//chloroplast thylakoid membrane;GO:0009543//chloroplast thylakoid lumen;GO:0016021//integral component of membrane	NA	NA	NA	gi|947082227|gb|KRH31016.1|//hypothetical protein GLYMA_11G222100 [Glycine max]
Aradu.KV3KX	1495	14275.5	11522.5	1.06229	0	Up	GO:0016021//integral component of membrane	GO:0005215//transporter activity	GO:0006810//transport	K09873//aquaporin TIP	gi|920682504|gb|KOM29276.1|//hypothetical protein LR48_Vigan641s006400 [Vigna angularis]
Aradu.KZ2JX	715	1376.51	5790	-1.31934	3.22246e-266	Down	NA	GO:0008233//peptidase activity;GO:0004869//cysteine-type endopeptidase inhibitor activity	GO:0010951//negative regulation of endopeptidase activity	K13899//cystatin-C	gi|306773390|emb|CBX19819.1|//cystein proteinase inhibitor [Arachis hypogaea]
Aradu.KZZ3J	1049	268.09	116.02	1.96155	4.00931e-38	Up	GO:0044434//chloroplast part;GO:0009526//plastid envelope	GO:0004364//glutathione transferase activity	GO:0006749//glutathione metabolic process	K00799//glutathione S-transferase [EC:2.5.1.18]	gi|965609199|dbj|BAT95690.1|//hypothetical protein VIGAN_08245800 [Vigna angularis var. angularis]
Aradu.L1HGF	1410	135.95	1516.72	-2.7266	2.53742e-183	Down	GO:0016021//integral component of membrane	GO:0004556//alpha-amylase activity;GO:0005509//calcium ion binding	GO:0005975//carbohydrate metabolic process	K01176//alpha-amylase [EC:3.2.1.1]	gi|357437821|ref|XP_003589186.1|//alpha amylase domain protein [Medicago truncatula]
Aradu.L2FUR	3724	26	1808.13	-5.36664	0	Down	NA	NA	NA	K17604//zinc finger SWIM domain-containing protein 3	gi|147799567|emb|CAN68463.1|//hypothetical protein VITISV_040413 [Vitis vinifera];gi|147765294|emb|CAN77889.1|//hypothetical protein VITISV_003778 [Vitis vinifera]
Aradu.L2ZIJ	1515	0	173	-7.68142	3.80737e-31	Down	GO:0005829//cytosol	GO:0019158//mannokinase activity;GO:0005524//ATP binding;GO:0070403//NAD+ binding;GO:0004340//glucokinase activity;GO:0008865//fructokinase activity;GO:0005536//glucose binding;GO:0004396//hexokinase activity	GO:0046835//carbohydrate phosphorylation;GO:0001678//cellular glucose homeostasis;GO:0016310//phosphorylation;GO:0051156//glucose 6-phosphate metabolic process;GO:0006096//glycolytic process;GO:0005975//carbohydrate metabolic process	K00844//hexokinase [EC:2.7.1.1]	gi|356564363|ref|XP_003550424.1|//PREDICTED: hexokinase-2, chloroplastic-like [Glycine max]
Aradu.L4EJ6	822	96.96	367.53	-1.16919	1.57964e-15	Down	GO:0005634//nucleus;GO:0070449//elongin complex	GO:0003677//DNA binding	GO:0006368//transcription elongation from RNA polymerase II promoter;GO:0006351//transcription, DNA-templated	K02542//DNA replication licensing factor MCM6 [EC:3.6.4.12];K15280//solute carrier family 35, member C2	gi|951064064|ref|XP_014523424.1|//PREDICTED: probable mediator of RNA polymerase II transcription subunit 26c [Vigna radiata var. radiata];gi|356567380|ref|XP_003551898.1|//PREDICTED: probable sugar phosphate/phosphate translocator At1g06470 [Glycine max]
Aradu.L4H02	1237	62	28	1.90005	9.38662e-10	Up	NA	NA	NA	K01679//fumarate hydratase, class II [EC:4.2.1.2]	NA
Aradu.L4MUM	1491	191.88	1018.17	-1.6545	1.07074e-66	Down	GO:0005794//Golgi apparatus	NA	NA	K12472//epidermal growth factor receptor substrate 15	gi|357439845|ref|XP_003590200.1|//embryonic abundant-like protein [Medicago truncatula];gi|950981439|ref|XP_014502295.1|//PREDICTED: dehydration-responsive protein RD22-like [Vigna radiata var. radiata]
Aradu.L50L9	4710	1810.92	1230.19	1.31105	1.14479e-139	Up	GO:0005871//kinesin complex	GO:0005524//ATP binding;GO:0008017//microtubule binding;GO:0008574//ATP-dependent microtubule motor activity, plus-end-directed	GO:0007018//microtubule-based movement	K10395//kinesin family member 4/21/27	gi|955380278|ref|XP_006600935.2|//PREDICTED: kinesin-like protein FRA1 isoform X2 [Glycine max];gi|734391159|gb|KHN27080.1|//Chromosome-associated kinesin KIF4A [Glycine soja];gi|356563596|ref|XP_003550047.1|//PREDICTED: kinesin-like protein FRA1 isoform X3 [Glycine max]
Aradu.L65IQ	1275	210.99	1146.84	-1.68921	4.04662e-77	Down	GO:0005788//endoplasmic reticulum lumen;GO:0033095//aleurone grain;GO:0005773//vacuole	GO:0008234//cysteine-type peptidase activity	GO:0006508//proteolysis	K16292//KDEL-tailed cysteine endopeptidase [EC:3.4.22.-]	gi|920697287|gb|KOM40512.1|//hypothetical protein LR48_Vigan04g071000 [Vigna angularis]
Aradu.L67UJ	1790	595.19	2185.41	-1.12328	5.02412e-79	Down	NA	NA	NA	NA	gi|922378384|ref|XP_013459431.1|//HMG (high mobility group) box protein [Medicago truncatula]
Aradu.L6KHA	400	4	72	-3.41672	2.58137e-12	Down	NA	NA	NA	NA	NA
Aradu.L6S7Y	1110	30.44	207.01	-2.01245	6.19474e-19	Down	GO:0005634//nucleus	GO:0003677//DNA binding	GO:0006355//regulation of transcription, DNA-templated;GO:0006351//transcription, DNA-templated	K12581//CCR4-NOT transcription complex subunit 7/8;K13126//polyadenylate-binding protein;K05941//glutathione gamma-glutamylcysteinyltransferase [EC:2.3.2.15];K01054//acylglycerol lipase [EC:3.1.1.23]	gi|593688503|ref|XP_007144886.1|//hypothetical protein PHAVU_007G192100g [Phaseolus vulgaris]
Aradu.L86UJ	4532	391.02	235.5	1.48472	1.3223e-37	Up	GO:0016021//integral component of membrane;GO:0005886//plasma membrane	GO:0005524//ATP binding;GO:0004672//protein kinase activity	GO:0006468//protein phosphorylation	K20718//LRR receptor-like serine/threonine-protein kinase ERECTA [EC:2.7.11.1];K13420//LRR receptor-like serine/threonine-protein kinase FLS2 [EC:2.7.11.1]	gi|955349679|ref|XP_014619378.1|//PREDICTED: probable LRR receptor-like serine/threonine-protein kinase At4g36180 [Glycine max]
Aradu.L924G	1485	65.91	300.38	-1.43501	3.13109e-17	Down	GO:0016021//integral component of membrane;GO:0005886//plasma membrane	GO:0022857//transmembrane transporter activity	GO:0006810//transport;GO:0055085//transmembrane transport	K07874//Ras-related protein Rab-1A;K00801//farnesyl-diphosphate farnesyltransferase [EC:2.5.1.21]	gi|356535430|ref|XP_003536248.1|//PREDICTED: WAT1-related protein At5g07050 isoform X1 [Glycine max]
Aradu.L9J3S	684	854.76	718.49	1.00376	4.36e-44	Up	NA	NA	NA	NA	gi|922375482|ref|XP_003601042.2|//adenine nucleotide alpha hydrolase superfamily protein [Medicago truncatula]
Aradu.L9VT7	2203	497.42	365.23	1.19887	1.40955e-34	Up	NA	NA	NA	K01530//phospholipid-translocating ATPase [EC:3.6.3.1];K11323//histone arginine demethylase JMJD6 [EC:1.14.11.-]	gi|734396165|gb|KHN29484.1|//hypothetical protein glysoja_005208 [Glycine soja];gi|571547919|ref|XP_006602722.1|//PREDICTED: flocculation protein FLO11-like isoform X1 [Glycine max]
Aradu.L9WUK	1086	52.68	198.39	-1.15981	4.62559e-09	Down	NA	NA	NA	K09419//heat shock transcription factor, other eukaryote	gi|357465547|ref|XP_003603058.1|//heat shock transcription factor [Medicago truncatula]
Aradu.LA8W4	695	6902.45	4428.93	1.39336	0	Up	NA	GO:0030414//peptidase inhibitor activity	GO:0010466//negative regulation of peptidase activity	NA	gi|66969430|gb|AAY59891.1|//serine protease inhibitor [Arachis hypogaea]
Aradu.LCH2B	1639	59.55	682.08	-2.76456	1.77421e-84	Down	GO:0016021//integral component of membrane;GO:0005886//plasma membrane	GO:0022857//transmembrane transporter activity	GO:0055085//transmembrane transport	K07874//Ras-related protein Rab-1A;K00801//farnesyl-diphosphate farnesyltransferase [EC:2.5.1.21]	gi|593783589|ref|XP_007154835.1|//hypothetical protein PHAVU_003G151700g [Phaseolus vulgaris];gi|502150096|ref|XP_004507786.1|//PREDICTED: WAT1-related protein At4g30420-like [Cicer arietinum]
Aradu.LCN30	1778	215.09	1049.11	-1.53295	1.16278e-61	Down	NA	NA	NA	K07466//replication factor A1	gi|922375162|ref|XP_003600272.2|//replication factor-A carboxy-terminal domain protein [Medicago truncatula];gi|357511469|ref|XP_003626023.1|//replication factor-A carboxy-terminal domain protein [Medicago truncatula]
Aradu.LF04V	1045	385	97	2.74201	8.93917e-80	Up	NA	NA	NA	NA	NA
Aradu.LFL4V	966	97.92	77.87	1.08374	3.5035e-07	Up	NA	NA	NA	NA	gi|502079226|ref|XP_004486194.1|//PREDICTED: uncharacterized protein LOC101513522 [Cicer arietinum]
Aradu.LK7ZD	1128	86.37	13	3.48523	1.57442e-23	Up	GO:0005737//cytoplasm	GO:0005506//iron ion binding;GO:0050113//inositol oxygenase activity	GO:0019310//inositol catabolic process;GO:0055114//oxidation-reduction process	K00469//inositol oxygenase [EC:1.13.99.1]	gi|255546251|ref|XP_002514185.1|//PREDICTED: inositol oxygenase 4 [Ricinus communis];gi|965656479|dbj|BAT72898.1|//hypothetical protein VIGAN_01034100 [Vigna angularis var. angularis]
Aradu.LM3N2	641	77	52	1.31955	1.36174e-07	Up	NA	NA	NA	NA	NA
Aradu.LP0UW	330	20.97	8.82	2.00268	0.000135536	Up	GO:0005634//nucleus;GO:0016021//integral component of membrane	GO:0061630//ubiquitin protein ligase activity;GO:0008270//zinc ion binding	GO:0043161//proteasome-mediated ubiquitin-dependent protein catabolic process;GO:0016567//protein ubiquitination	K19041//E3 ubiquitin-protein ligase RNF38/44 [EC:2.3.2.27]	gi|502150114|ref|XP_004507795.1|//PREDICTED: RING-H2 finger protein ATL56 [Cicer arietinum]
Aradu.LPM18	630	78.01	493.81	-1.90902	4.25705e-40	Down	NA	NA	NA	NA	gi|697107614|ref|XP_009607644.1|//PREDICTED: uncharacterized protein LOC104101825 [Nicotiana tomentosiformis];gi|971567228|ref|XP_015168552.1|//PREDICTED: uncharacterized protein LOC107062424 [Solanum tuberosum]
Aradu.LQT7X	828	64	50	1.10935	2.08005e-05	Up	NA	NA	NA	K11968//ariadne-1 [EC:2.3.2.27]	gi|951022555|ref|XP_014512952.1|//PREDICTED: protein yippee-like [Vigna radiata var. radiata];gi|356523300|ref|XP_003530278.1|//PREDICTED: protein yippee-like [Glycine max]
Aradu.LSK26	2734	56.68	356.64	-1.90035	3.02165e-29	Down	GO:0016020//membrane	GO:0000166//nucleotide binding;GO:0004672//protein kinase activity	GO:0016310//phosphorylation	K04733//interleukin-1 receptor-associated kinase 4 [EC:2.7.11.1]	gi|593654547|ref|XP_007143190.1|//hypothetical protein PHAVU_007G051200g [Phaseolus vulgaris]
Aradu.LVU6W	1452	122.57	74.12	1.47888	7.18336e-13	Up	NA	GO:0008270//zinc ion binding	NA	K01074//palmitoyl-protein thioesterase [EC:3.1.2.22];K19090//CRISPR-associated protein Cas5t;K19589//release factor glutamine methyltransferase [EC:2.1.1.297]	gi|922395771|ref|XP_003590373.2|//pentatricopeptide (PPR) repeat protein [Medicago truncatula]
Aradu.LW24D	942	49	169.01	-1.03305	6.87141e-07	Down	NA	NA	NA	NA	gi|920711750|gb|KOM52999.1|//hypothetical protein LR48_Vigan09g165800 [Vigna angularis]
Aradu.LX9DH	2295	2	407	-6.91568	5.14989e-75	Down	NA	NA	NA	K07466//replication factor A1	gi|698447244|ref|XP_009770498.1|//PREDICTED: replication protein A 70 kDa DNA-binding subunit A-like [Nicotiana sylvestris];gi|698525996|ref|XP_009759827.1|//PREDICTED: uncharacterized protein LOC104212304 [Nicotiana sylvestris]
Aradu.LZA9P	1785	1371.22	969.89	1.25277	5.46363e-99	Up	NA	NA	NA	K01889//phenylalanyl-tRNA synthetase alpha chain [EC:6.1.1.20];K11649//SWI/SNF related-matrix-associated actin-dependent regulator of chromatin subfamily C;K04079//molecular chaperone HtpG;K08955//ATP-dependent metalloprotease [EC:3.4.24.-]	gi|593486741|ref|XP_007140868.1|//hypothetical protein PHAVU_008G148100g [Phaseolus vulgaris]
Aradu.M0E1Q	1916	272.63	193.37	1.24879	6.71731e-21	Up	NA	NA	NA	NA	gi|356509598|ref|XP_003523534.1|//PREDICTED: uncharacterized protein LOC100815394 [Glycine max]
Aradu.M0NEF	1945	507	2480.4	-1.53731	3.10799e-144	Down	GO:0016021//integral component of membrane	GO:0004674//protein serine/threonine kinase activity;GO:0005524//ATP binding;GO:0008168//methyltransferase activity;GO:0004402//histone acetyltransferase activity	GO:0006468//protein phosphorylation;GO:0016573//histone acetylation;GO:0032259//methylation	K00924;K12890//splicing factor, arginine/serine-rich 1	gi|502145506|ref|XP_004506058.1|//PREDICTED: protein N-lysine methyltransferase METTL21A [Cicer arietinum];gi|734395403|gb|KHN28913.1|//LRR receptor-like serine/threonine-protein kinase GSO1 [Glycine soja]
Aradu.M1RRB	1208	129.11	458.23	-1.07426	9.59027e-17	Down	NA	GO:0004392//heme oxygenase (decyclizing) activity	GO:0006788//heme oxidation	K00510//heme oxygenase (biliverdin-producing) [EC:1.14.14.18]	gi|605059929|gb|AHV90559.1|//heme oxygenase, partial [Betula platyphylla]
Aradu.M2HKZ	1614	227.58	155	1.30731	6.58831e-19	Up	GO:0043625//delta DNA polymerase complex	GO:0046872//metal ion binding;GO:0003677//DNA binding;GO:0003887//DNA-directed DNA polymerase activity;GO:0000166//nucleotide binding;GO:0008296//3'-5'-exodeoxyribonuclease activity	GO:0071897//DNA biosynthetic process;GO:0006297//nucleotide-excision repair, DNA gap filling;GO:0090305//nucleic acid phosphodiester bond hydrolysis;GO:0045004//DNA replication proofreading;GO:0006287//base-excision repair, gap-filling	K02327//DNA polymerase delta subunit 1 [EC:2.7.7.7]	gi|976898932|gb|KVH87702.1|//hypothetical protein Ccrd_025014 [Cynara cardunculus var. scolymus];gi|955324487|ref|XP_014631963.1|//PREDICTED: DNA polymerase delta catalytic subunit isoform X2 [Glycine max];gi|955324489|ref|XP_014631964.1|//PREDICTED: DNA polymerase delta catalytic subunit isoform X3 [Glycine max]
Aradu.M2ZDQ	1397	81.97	1301.46	-3.23568	1.11325e-185	Down	NA	GO:0061630//ubiquitin protein ligase activity;GO:0008270//zinc ion binding;GO:0016874//ligase activity	GO:0043161//proteasome-mediated ubiquitin-dependent protein catabolic process;GO:0016567//protein ubiquitination	K10635//E3 ubiquitin-protein ligase Arkadia [EC:2.3.2.27];K19041//E3 ubiquitin-protein ligase RNF38/44 [EC:2.3.2.27]	gi|947101829|gb|KRH50321.1|//hypothetical protein GLYMA_07G214600 [Glycine max];gi|357475293|ref|XP_003607932.1|//RING zinc finger protein, putative [Medicago truncatula]
Aradu.M35ZU	1196	275.72	201.16	1.20807	3.97539e-20	Up	NA	GO:0005524//ATP binding;GO:0016787//hydrolase activity;GO:0004017//adenylate kinase activity	GO:0046939//nucleotide phosphorylation	K00939//adenylate kinase [EC:2.7.4.3]	gi|571558318|ref|XP_006604547.1|//PREDICTED: adenylate kinase 1, chloroplastic-like [Glycine max]
Aradu.M5SUM	3113	524.1	385.97	1.19456	3.79797e-36	Up	GO:0016459//myosin complex	GO:0003779//actin binding;GO:0005524//ATP binding;GO:0003774//motor activity;GO:0016157//sucrose synthase activity	GO:0005985//sucrose metabolic process	K10357//myosin V;K00695//sucrose synthase [EC:2.4.1.13]	gi|734420831|gb|KHN41027.1|//Sucrose synthase 2 [Glycine soja];gi|734376553|gb|KHN21355.1|//Unconventional myosin-Va [Glycine soja]
Aradu.M66BW	588	125.47	86.82	1.28445	6.38987e-11	Up	GO:0005634//nucleus	GO:0046982//protein heterodimerization activity;GO:0043565//sequence-specific DNA binding	GO:0006355//regulation of transcription, DNA-templated	K08065//nuclear transcription Y subunit beta	gi|922357610|ref|XP_003617812.2|//nuclear transcription factor Y protein [Medicago truncatula]
Aradu.M6HNJ	4513	640.63	2450.62	-1.18238	7.47226e-96	Down	GO:0016020//membrane	GO:0004672//protein kinase activity	GO:0016310//phosphorylation	K04733//interleukin-1 receptor-associated kinase 4 [EC:2.7.11.1]	gi|947069474|gb|KRH18365.1|//hypothetical protein GLYMA_13G054400 [Glycine max]
Aradu.M6THB	1660	571.16	414.01	1.21744	2.16435e-40	Up	GO:0005783//endoplasmic reticulum;GO:0016021//integral component of membrane	GO:0008289//lipid binding	NA	K12486//stromal membrane-associated protein;K19938//rabphilin-3A;K03511//DNA polymerase kappa [EC:2.7.7.7]	gi|356535625|ref|XP_003536345.1|//PREDICTED: synaptotagmin-3-like isoform X1 [Glycine max]
Aradu.M7BX0	1359	358.02	176	1.77767	2.76188e-44	Up	GO:0016020//membrane;GO:0005887//integral component of plasma membrane	GO:0008515//sucrose transmembrane transporter activity	GO:0015770//sucrose transport	K15378//solute carrier family 45, member 1/2/4	gi|920715687|gb|KOM55775.1|//hypothetical protein LR48_Vigan10g166700 [Vigna angularis];gi|78192247|gb|ABB30164.1|//sucrose transport protein SUT1 [Phaseolus vulgaris]
Aradu.M8Q81	1306	118.34	536.82	-1.42829	2.75808e-29	Down	GO:0016592//mediator complex	GO:0001104//RNA polymerase II transcription cofactor activity	GO:0006357//regulation of transcription from RNA polymerase II promoter	K03126//transcription initiation factor TFIID subunit 12;K14307//nucleoporin p58/p45;K15168//mediator of RNA polymerase II transcription subunit 25;K20641//Rho GTPase-activating protein 20	gi|571468857|ref|XP_006584474.1|//PREDICTED: uncharacterized protein LOC100305737 isoform X1 [Glycine max];gi|734418000|gb|KHN39308.1|//hypothetical protein glysoja_018080 [Glycine soja];gi|357513635|ref|XP_003627106.1|//mediator of RNA polymerase II transcription subunit-like protein, putative [Medicago truncatula]
Aradu.MA4ZB	3214	1238.22	640	1.70533	6.34195e-141	Up	GO:0016021//integral component of membrane	GO:0030246//carbohydrate binding;GO:0008270//zinc ion binding;GO:0004559//alpha-mannosidase activity	GO:0006013//mannose metabolic process;GO:0006517//protein deglycosylation	K01191//alpha-mannosidase [EC:3.2.1.24]	gi|571435670|ref|XP_006573549.1|//PREDICTED: alpha-mannosidase-like [Glycine max];gi|947121558|gb|KRH69764.1|//hypothetical protein GLYMA_02G046800 [Glycine max]
Aradu.MCD22	2307	1068.17	464.58	1.95435	2.08171e-146	Up	GO:0016021//integral component of membrane	GO:0004674//protein serine/threonine kinase activity;GO:0005524//ATP binding;GO:0042803//protein homodimerization activity	GO:0006468//protein phosphorylation	K04730//interleukin-1 receptor-associated kinase 1 [EC:2.7.11.1]	gi|502121936|ref|XP_004497498.1|//PREDICTED: serine/threonine-protein kinase-like protein CCR1 [Cicer arietinum]
Aradu.MDU1L	2082	0	661.91	-9.61728	3.89268e-92	Down	GO:0016020//membrane;GO:0016021//integral component of membrane	NA	NA	K14794//ribosomal RNA-processing protein 12	gi|947091058|gb|KRH39723.1|//hypothetical protein GLYMA_09G216300 [Glycine max];gi|356495264|ref|XP_003516499.1|//PREDICTED: protein NUCLEAR FUSION DEFECTIVE 4-like [Glycine max];gi|734348227|gb|KHN11805.1|//hypothetical protein glysoja_006258 [Glycine soja]
Aradu.MEC8Q	2393	20.54	1092.83	-4.98028	1.19636e-201	Down	GO:0005634//nucleus	NA	NA	K18810//cyclin D1/2/4, plant	gi|593788922|ref|XP_007157500.1|//hypothetical protein PHAVU_002G074800g [Phaseolus vulgaris]
Aradu.MEG9G	1790	447.18	119.72	2.6544	2.56777e-89	Up	GO:0005887//integral component of plasma membrane	GO:0005355//glucose transmembrane transporter activity;GO:0005351//sugar:proton symporter activity	GO:0046323//glucose import;GO:0015992//proton transport;GO:1904659//glucose transmembrane transport	K16055//trehalose 6-phosphate synthase/phosphatase [EC:2.4.1.15 3.1.3.12];K08150//MFS transporter, SP family, solute carrier family 2 (myo-inositol transporter), member 13;K08145//MFS transporter, SP family, solute carrier family 2 (facilitated glucose transporter), member 8	gi|950967254|ref|XP_014499281.1|//PREDICTED: sugar transport protein 5-like [Vigna radiata var. radiata]
Aradu.MEI7N	2724	405.56	1427.37	-1.06217	8.69394e-48	Down	NA	NA	NA	K11294//nucleolin;K20478//golgin subfamily B member 1	gi|356575963|ref|XP_003556105.1|//PREDICTED: low-temperature-induced 65 kDa protein [Glycine max]
Aradu.MH9NW	1663	330.44	64.21	3.11673	9.90689e-78	Up	GO:0005829//cytosol;GO:0005794//Golgi apparatus	GO:0016757//transferase activity, transferring glycosyl groups;GO:0052691//UDP-arabinopyranose mutase activity	GO:0033356//UDP-L-arabinose metabolic process;GO:0030244//cellulose biosynthetic process;GO:0009832//plant-type cell wall biogenesis	K13379//reversibly glycosylated polypeptide / UDP-arabinopyranose mutase [EC:2.4.1.- 5.4.99.30]	gi|356526536|ref|XP_003531873.1|//PREDICTED: alpha-1,4-glucan-protein synthase [UDP-forming] 1 [Glycine max]
Aradu.MHI7E	1145	780.94	279.94	2.2333	4.24581e-127	Up	NA	NA	NA	K08059//interferon, gamma-inducible protein 30	gi|194466075|gb|ACF74268.1|//unknown [Arachis hypogaea]
Aradu.MJ6HP	825	86.37	0	8.18567	2.54962e-25	Up	NA	GO:0003743//translation initiation factor activity	GO:0006413//translational initiation	K08857//NIMA (never in mitosis gene a)-related kinase 1/4/5 [EC:2.7.11.1];K03501//16S rRNA (guanine527-N7)-methyltransferase [EC:2.1.1.170];K11593//eukaryotic translation initiation factor 2C	gi|955326418|ref|XP_014632339.1|//PREDICTED: protein argonaute 4A-like [Glycine max]
Aradu.MJF8P	1184	12	82	-2.01938	1.51537e-08	Down	NA	NA	NA	K03036//26S proteasome regulatory subunit N6	gi|388494498|gb|AFK35315.1|//unknown [Lotus japonicus];gi|593306080|ref|XP_007137150.1|//hypothetical protein PHAVU_009G104000g [Phaseolus vulgaris]
Aradu.MJJ0W	632	34	6	3.25571	8.32609e-10	Up	GO:0009570//chloroplast stroma	NA	NA	NA	gi|357441797|ref|XP_003591176.1|//TPR repeat protein [Medicago truncatula];gi|502117065|ref|XP_004495687.1|//PREDICTED: uncharacterized protein LOC101491022 [Cicer arietinum]
Aradu.MKG78	963	100	2	6.39706	9.36943e-33	Up	NA	NA	NA	NA	gi|593660386|ref|XP_007143226.1|//hypothetical protein PHAVU_007G054700g [Phaseolus vulgaris]
Aradu.ML8EZ	645	1249.09	1049.73	1.00407	1.03697e-63	Up	NA	NA	NA	NA	gi|596192426|ref|XP_007223513.1|//hypothetical protein PRUPE_ppa011892mg [Prunus persica];gi|728829719|gb|KHG09162.1|//Glutamate-1-semialdehyde 2,1-aminomutase 1 [Gossypium arboreum]
Aradu.MM6MH	1600	4136.49	3304.05	1.07738	1.21581e-232	Up	GO:0005783//endoplasmic reticulum	GO:0003756//protein disulfide isomerase activity	GO:0006457//protein folding;GO:0034976//response to endoplasmic reticulum stress;GO:0045454//cell redox homeostasis	K09584//protein disulfide-isomerase A6 [EC:5.3.4.1]	gi|965665533|dbj|BAT81021.1|//hypothetical protein VIGAN_03066400 [Vigna angularis var. angularis]
Aradu.MM8M8	3345	339.07	169.41	1.75427	2.69441e-41	Up	GO:0005874//microtubule	GO:0005524//ATP binding;GO:0003777//microtubule motor activity;GO:0008017//microtubule binding	GO:0007018//microtubule-based movement	K10406//kinesin family member C2/C3	gi|571557051|ref|XP_006604352.1|//PREDICTED: kinesin-4-like [Glycine max]
Aradu.MQ4WG	2083	795.45	286.06	2.22866	4.17484e-129	Up	GO:0016021//integral component of membrane	GO:0005524//ATP binding;GO:0004672//protein kinase activity	GO:0006468//protein phosphorylation	K04733//interleukin-1 receptor-associated kinase 4 [EC:2.7.11.1]	gi|356534353|ref|XP_003535720.1|//PREDICTED: probable leucine-rich repeat receptor-like protein kinase At1g68400 [Glycine max]
Aradu.MR104	853	51.03	291.3	-1.75988	5.9907e-22	Down	GO:0005576//extracellular region	NA	GO:0019953//sexual reproduction	K20628//expansin	gi|922355450|ref|XP_003611388.2|//expansin-B1-like protein [Medicago truncatula]
Aradu.MT561	3087	24634.5	7414.94	2.48538	0	Up	NA	NA	NA	K12900//FUS-interacting serine-arginine-rich protein 1	gi|922327153|ref|XP_013442969.1|//senescence-associated protein [Medicago truncatula];gi|922327207|ref|XP_013442996.1|//senescence-associated protein [Medicago truncatula]
Aradu.MVI3C	862	73.09	326.34	-1.40542	4.72664e-18	Down	NA	GO:0004721//phosphoprotein phosphatase activity	NA	K17618//ubiquitin-like domain-containing CTD phosphatase 1 [EC:3.1.3.16]	gi|502126868|ref|XP_004499470.1|//PREDICTED: ubiquitin-like domain-containing CTD phosphatase 1 [Cicer arietinum];gi|593332066|ref|XP_007139459.1|//hypothetical protein PHAVU_008G031500g [Phaseolus vulgaris]
Aradu.MY5RT	832	2745.32	2149.72	1.10603	1.46932e-161	Up	NA	NA	NA	NA	gi|947097864|gb|KRH46449.1|//hypothetical protein GLYMA_08G334500 [Glycine max]
Aradu.N0F3U	1506	1166.79	798.79	1.29986	2.287e-89	Up	GO:0005829//cytosol	GO:0003922//GMP synthase (glutamine-hydrolyzing) activity;GO:0016787//hydrolase activity;GO:0016740//transferase activity	GO:0006541//glutamine metabolic process	NA	gi|734364545|gb|KHN17292.1|//Putative glutamine amidotransferase [Glycine soja]
Aradu.N0FIV	1325	275	77	2.58971	4.14966e-54	Up	GO:0016021//integral component of membrane	GO:0004674//protein serine/threonine kinase activity;GO:0005524//ATP binding;GO:0004714//transmembrane receptor protein tyrosine kinase activity	GO:0018108//peptidyl-tyrosine phosphorylation	K04733//interleukin-1 receptor-associated kinase 4 [EC:2.7.11.1]	gi|356559110|ref|XP_003547844.1|//PREDICTED: probable leucine-rich repeat receptor-like protein kinase At5g49770 [Glycine max];gi|922336505|ref|XP_013446242.1|//LRR receptor-like kinase [Medicago truncatula]
Aradu.N0GRH	1740	1097.72	826.84	1.16204	8.18364e-71	Up	NA	NA	NA	NA	NA
Aradu.N19AE	977	32.16	264.3	-2.28563	1.54214e-27	Down	NA	NA	NA	NA	gi|357514385|ref|XP_003627481.1|//strubbelig-receptor family 6 protein [Medicago truncatula]
Aradu.N2IL4	979	105	2	6.46745	3.14222e-34	Up	GO:0009506//plasmodesma;GO:0016021//integral component of membrane;GO:0005886//plasma membrane	GO:0005524//ATP binding;GO:0004674//protein serine/threonine kinase activity	GO:0006952//defense response;GO:0048544//recognition of pollen;GO:0006468//protein phosphorylation	K04733//interleukin-1 receptor-associated kinase 4 [EC:2.7.11.1];K15397//3-ketoacyl-CoA synthase [EC:2.3.1.199]	gi|920700485|gb|KOM43710.1|//hypothetical protein LR48_Vigan05g131500 [Vigna angularis]
Aradu.N2X0I	1261	1267.38	912.12	1.22776	8.40007e-89	Up	GO:0016020//membrane;GO:0009505//plant-type cell wall;GO:0005576//extracellular region	GO:0020037//heme binding;GO:0046872//metal ion binding;GO:0004601//peroxidase activity	GO:0006979//response to oxidative stress;GO:0009664//plant-type cell wall organization;GO:0098869//cellular oxidant detoxification;GO:0042744//hydrogen peroxide catabolic process;GO:0055114//oxidation-reduction process	K00430//peroxidase [EC:1.11.1.7]	gi|593797714|ref|XP_007161895.1|//hypothetical protein PHAVU_001G106600g [Phaseolus vulgaris]
Aradu.N4XUZ	504	49.13	30.27	1.45192	4.88439e-06	Up	GO:0022625//cytosolic large ribosomal subunit	GO:0003735//structural constituent of ribosome	GO:1902626//assembly of large subunit precursor of preribosome;GO:0000027//ribosomal large subunit assembly;GO:0006412//translation	K02896//large subunit ribosomal protein L24e	gi|965604874|dbj|BAT92050.1|//hypothetical protein VIGAN_07070800 [Vigna angularis var. angularis]
Aradu.N4Y9K	1280	77.6	300.4	-1.19955	1.79774e-13	Down	NA	NA	NA	K09422//myb proto-oncogene protein, plant	gi|593794685|ref|XP_007160381.1|//hypothetical protein PHAVU_002G317000g [Phaseolus vulgaris]
Aradu.N52DB	915	233	804	-1.03366	1.65592e-26	Down	GO:0005737//cytoplasm	GO:0061630//ubiquitin protein ligase activity;GO:0031625//ubiquitin protein ligase binding	GO:0016567//protein ubiquitination	K20417//palmitoyl-[glycerolipid] 3-(E)-desaturase [EC:1.14.19.43]	gi|734372339|gb|KHN19819.1|//Transmembrane protein 189 [Glycine soja]
Aradu.N56TJ	1988	347	272.86	1.09998	1.15393e-21	Up	GO:0005618//cell wall;GO:0016021//integral component of membrane	GO:0045330//aspartyl esterase activity;GO:0030599//pectinesterase activity;GO:0046910//pectinesterase inhibitor activity	GO:0045490//pectin catabolic process;GO:0043086//negative regulation of catalytic activity;GO:0042545//cell wall modification	K01051//pectinesterase [EC:3.1.1.11]	gi|965671679|dbj|BAT86286.1|//hypothetical protein VIGAN_04392200 [Vigna angularis var. angularis]
Aradu.N57FE	210	18	9	1.75321	0.000934394	Up	NA	NA	NA	NA	NA
Aradu.N5BYB	846	387	313	1.05938	1.20295e-22	Up	NA	NA	NA	NA	NA
Aradu.N6TY9	747	65	46.22	1.24513	3.0988e-06	Up	NA	NA	NA	NA	NA
Aradu.N7F34	1591	60.36	304.28	-1.58053	7.52208e-20	Down	GO:0009570//chloroplast stroma	GO:0032440//2-alkenal reductase [NAD(P)] activity;GO:0046872//metal ion binding;GO:0042132//fructose 1,6-bisphosphate 1-phosphatase activity	GO:0019253//reductive pentose-phosphate cycle;GO:0016311//dephosphorylation;GO:0055114//oxidation-reduction process	K03841//fructose-1,6-bisphosphatase I [EC:3.1.3.11]	gi|356568028|ref|XP_003552216.1|//PREDICTED: fructose-1,6-bisphosphatase, chloroplastic [Glycine max]
Aradu.N7HLR	1157	943.01	793.49	1.00227	2.35101e-48	Up	GO:0016020//membrane;GO:0005634//nucleus;GO:0016021//integral component of membrane;GO:0005789//endoplasmic reticulum membrane	GO:0043565//sequence-specific DNA binding;GO:0003700//transcription factor activity, sequence-specific DNA binding	GO:0006355//regulation of transcription, DNA-templated;GO:0030968//endoplasmic reticulum unfolded protein response	NA	gi|388501110|gb|AFK38621.1|//unknown [Lotus japonicus];gi|502169952|ref|XP_004514723.1|//PREDICTED: bZIP transcription factor 60 [Cicer arietinum]
Aradu.N7LCR	1145	20.9	165.95	-2.23597	1.75434e-17	Down	NA	NA	NA	NA	gi|802702719|ref|XP_012084021.1|//PREDICTED: uncharacterized protein LOC105643501 [Jatropha curcas];gi|357449069|ref|XP_003594810.1|//transmembrane protein, putative [Medicago truncatula]
Aradu.N7TNH	2528	440.05	1899.39	-1.35659	3.95146e-92	Down	NA	GO:0016787//hydrolase activity	GO:0008152//metabolic process	K18551//pyrimidine and pyridine-specific 5'-nucleotidase [EC:3.1.3.-]	gi|920692162|gb|KOM35387.1|//hypothetical protein LR48_Vigan02g153700 [Vigna angularis]
Aradu.N8FJN	1327	862.97	2939.51	-1.01499	6.95159e-90	Down	GO:0009507//chloroplast	GO:0004322//ferroxidase activity;GO:0008199//ferric iron binding	GO:0006879//cellular iron ion homeostasis;GO:0006826//iron ion transport;GO:0055114//oxidation-reduction process	K00522//ferritin heavy chain [EC:1.16.3.2]	gi|356503052|ref|XP_003520326.1|//PREDICTED: ferritin-2, chloroplastic [Glycine max]
Aradu.N8J5B	475	97.93	68.56	1.26759	9.53556e-09	Up	NA	NA	NA	NA	gi|502146217|ref|XP_004506354.1|//PREDICTED: probable inactive purple acid phosphatase 24 [Cicer arietinum]
Aradu.N8WG9	1768	1535.14	638.68	2.01841	8.7364e-219	Up	NA	GO:0004332//fructose-bisphosphate aldolase activity	GO:0006096//glycolytic process	K01623//fructose-bisphosphate aldolase, class I [EC:4.1.2.13]	gi|693302447|gb|AIS36040.1|//fructose bisphosphate aldolase [Arachis hypogaea]
Aradu.NA077	1098	68	286	-1.3192	1.04992e-14	Down	NA	NA	NA	NA	NA
Aradu.NC0MB	3179	241.27	150.23	1.43668	8.96569e-23	Up	NA	NA	NA	K10268//F-box and leucine-rich repeat protein 2/20	gi|947072057|gb|KRH20948.1|//hypothetical protein GLYMA_13G211600 [Glycine max];gi|947113428|gb|KRH61730.1|//hypothetical protein GLYMA_04G065000 [Glycine max]
Aradu.NC6JU	1984	2169.78	7347.35	-1.00647	2.33584e-219	Down	GO:0005829//cytosol	GO:0004411//homogentisate 1,2-dioxygenase activity	GO:0006572//tyrosine catabolic process;GO:1902000//homogentisate catabolic process;GO:0055114//oxidation-reduction process;GO:0006559//L-phenylalanine catabolic process	K00451//homogentisate 1,2-dioxygenase [EC:1.13.11.5]	gi|571493465|ref|XP_006592560.1|//PREDICTED: homogentisate 1,2-dioxygenase-like [Glycine max]
Aradu.NE9UM	2649	544.55	3201.54	-1.80242	1.49507e-232	Down	NA	NA	NA	K15082//DNA repair protein RAD7	gi|922390239|ref|XP_013463542.1|//Rad7, putative [Medicago truncatula]
Aradu.NG8V7	3016	2538.53	2021	1.08213	2.39029e-144	Up	NA	NA	GO:0009987//cellular process	K14503//brassinosteroid resistant 1/2	gi|571539525|ref|XP_006601311.1|//PREDICTED: protein BRASSINAZOLE-RESISTANT 1-like [Glycine max]
Aradu.NH44H	1047	945.37	770.73	1.04786	4.98766e-52	Up	NA	NA	NA	K13425//WRKY transcription factor 22	gi|151934217|gb|ABS18446.1|//WRKY50 [Glycine max]
Aradu.NH8IF	2116	480.99	1922.52	-1.24571	6.88442e-82	Down	GO:0016020//membrane	GO:0003855//3-dehydroquinate dehydratase activity;GO:0003824//catalytic activity;GO:0004764//shikimate 3-dehydrogenase (NADP+) activity	GO:0055114//oxidation-reduction process	K13832//3-dehydroquinate dehydratase / shikimate dehydrogenase [EC:4.2.1.10 1.1.1.25]	gi|955313337|ref|XP_014629492.1|//PREDICTED: bifunctional 3-dehydroquinate dehydratase/shikimate dehydrogenase, chloroplastic-like isoform X1 [Glycine max]
Aradu.NJ2WV	2224	278.55	1189.7	-1.34138	2.48732e-57	Down	GO:0009505//plant-type cell wall;GO:0009506//plasmodesma	GO:0016722//oxidoreductase activity, oxidizing metal ions;GO:0005507//copper ion binding	GO:0055114//oxidation-reduction process	K19791//iron transport multicopper oxidase	gi|502144383|ref|XP_004505676.1|//PREDICTED: L-ascorbate oxidase homolog [Cicer arietinum]
Aradu.NP2NU	1523	287.47	20.05	4.59494	7.60206e-88	Up	GO:0016021//integral component of membrane	GO:0016491//oxidoreductase activity	GO:0055114//oxidation-reduction process	K04708//3-dehydrosphinganine reductase [EC:1.1.1.102]	gi|593694462|ref|XP_007147752.1|//hypothetical protein PHAVU_006G152000g [Phaseolus vulgaris]
Aradu.NPK2K	2800	214	763	-1.08087	5.03479e-27	Down	NA	NA	NA	K05909//laccase [EC:1.10.3.2];K01188//beta-glucosidase [EC:3.2.1.21];K00620//glutamate N-acetyltransferase / amino-acid N-acetyltransferase [EC:2.3.1.35 2.3.1.1];K18195//rhamnogalacturonan endolyase [EC:4.2.2.23];K08873//serine/threonine-protein kinase SMG1 [EC:2.7.11.1]	gi|124359343|gb|ABD28505.2|//RNA-directed DNA polymerase (Reverse transcriptase); Polynucleotidyl transferase, Ribonuclease H fold [Medicago truncatula]
Aradu.NSZ11	1131	205.94	0	9.43929	3.01473e-50	Up	NA	NA	NA	K08592//sentrin-specific protease 1 [EC:3.4.22.68]	gi|357484057|ref|XP_003612315.1|//Ulp1 protease family, carboxy-terminal domain protein [Medicago truncatula]
Aradu.NTQ7W	2006	181.23	761.07	-1.317	2.83438e-36	Down	GO:0005634//nucleus	NA	NA	K09419//heat shock transcription factor, other eukaryote	gi|965614893|dbj|BAU00526.1|//hypothetical protein VIGAN_10212900 [Vigna angularis var. angularis]
Aradu.NUY55	2342	1697.32	7612.82	-1.41197	0	Down	NA	NA	NA	NA	gi|502148102|ref|XP_004507038.1|//PREDICTED: uncharacterized protein LOC101500032 [Cicer arietinum];gi|593513184|ref|XP_007142109.1|//hypothetical protein PHAVU_008G253300g [Phaseolus vulgaris]
Aradu.NVV3E	739	0	42.45	-5.65449	1.38062e-09	Down	GO:0030126//COPI vesicle coat	GO:0005198//structural molecule activity	GO:0006886//intracellular protein transport;GO:0006888//ER to Golgi vesicle-mediated transport;GO:0006890//retrograde vesicle-mediated transport, Golgi to ER;GO:0006891//intra-Golgi vesicle-mediated transport	K17302//coatomer subunit beta';K12447//UDP-sugar pyrophosphorylase [EC:2.7.7.64]	gi|743917476|ref|XP_011002725.1|//PREDICTED: coatomer subunit beta'-2 [Populus euphratica]
Aradu.NW8ML	1251	654.62	300.83	1.87492	1.55652e-85	Up	GO:0009507//chloroplast	NA	NA	K01859//chalcone isomerase [EC:5.5.1.6]	gi|763760744|gb|KJB27998.1|//hypothetical protein B456_005G020800, partial [Gossypium raimondii]
Aradu.NXB9J	1186	9	246	-4.01938	1.65362e-42	Down	GO:0022627//cytosolic small ribosomal subunit	GO:0048027//mRNA 5'-UTR binding;GO:0070181//small ribosomal subunit rRNA binding;GO:0003735//structural constituent of ribosome	GO:0000028//ribosomal small subunit assembly;GO:0000462//maturation of SSU-rRNA from tricistronic rRNA transcript (SSU-rRNA, 5.8S rRNA, LSU-rRNA);GO:0006412//translation	K02955//small subunit ribosomal protein S14e	gi|449453111|ref|XP_004144302.1|//PREDICTED: uncharacterized protein LOC101212156 [Cucumis sativus];gi|743936015|ref|XP_011012389.1|//PREDICTED: 40S ribosomal protein S14-like [Populus euphratica]
Aradu.P0XHI	2132	452.12	280.42	1.44232	1.82503e-41	Up	GO:0005618//cell wall	GO:0004252//serine-type endopeptidase activity	GO:0006508//proteolysis	K04733//interleukin-1 receptor-associated kinase 4 [EC:2.7.11.1];K13199//plasminogen activator inhibitor 1 RNA-binding protein;K01183//chitinase [EC:3.2.1.14]	gi|356533680|ref|XP_003535388.1|//PREDICTED: subtilisin-like protease SBT1.7 [Glycine max]
Aradu.P1CU1	921	15.37	551.25	-4.41131	5.57159e-98	Down	NA	NA	NA	K05909//laccase [EC:1.10.3.2];K03661//V-type H+-transporting ATPase 21kDa proteolipid subunit	gi|922379381|ref|XP_013459926.1|//hypothetical protein MTR_3g055517 [Medicago truncatula];gi|698561717|ref|XP_009772204.1|//PREDICTED: uncharacterized protein LOC104222656 [Nicotiana sylvestris];gi|728821797|gb|KHG04508.1|//V-type proton ATPase subunit c'' [Gossypium arboreum]
Aradu.P1LA4	1998	512.25	337.77	1.35401	1.22608e-42	Up	GO:0016020//membrane	GO:0016788//hydrolase activity, acting on ester bonds	GO:0071555//cell wall organization	K01051//pectinesterase [EC:3.1.1.11]	gi|593266370|ref|XP_007135363.1|//hypothetical protein PHAVU_010G123100g [Phaseolus vulgaris]
Aradu.P1X6T	573	0	21.13	-4.64801	1.93018e-05	Down	NA	NA	NA	NA	NA
Aradu.P2S76	1137	587	191	2.37299	4.67128e-103	Up	NA	GO:0044373//cytokinin binding	GO:0016337//single organismal cell-cell adhesion;GO:0080037//negative regulation of cytokinin-activated signaling pathway	K04733//interleukin-1 receptor-associated kinase 4 [EC:2.7.11.1]	gi|4033446|sp|Q39529.1|LEC2_CLAKE//RecName: Full=Agglutinin-2; AltName: Full=Agglutinin II; AltName: Full=ClAII; AltName: Full=LecClAII; Flags: Precursor
Aradu.P2TU7	1001	44.81	212.46	-1.49209	2.43853e-13	Down	GO:0005795//Golgi stack;GO:0005783//endoplasmic reticulum;GO:0098588//bounding membrane of organelle;GO:0005829//cytosol;GO:0012507//ER to Golgi transport vesicle membrane;GO:0000139//Golgi membrane;GO:0044431//Golgi apparatus part	GO:0008565//protein transporter activity	GO:0006810//transport;GO:0046907//intracellular transport;GO:0032527//protein exit from endoplasmic reticulum;GO:0048211//Golgi vesicle docking;GO:0044763//single-organism cellular process;GO:0006886//intracellular protein transport;GO:0061025//membrane fusion;GO:0048193//Golgi vesicle transport;GO:0009791//post-embryonic development;GO:0048280//vesicle fusion with Golgi apparatus;GO:0006888//ER …	NA	gi|734371818|gb|KHN19682.1|//Golgin candidate 6 [Glycine soja];gi|828292960|ref|XP_012568043.1|//PREDICTED: golgin candidate 6 isoform X2 [Cicer arietinum];gi|571553184|ref|XP_003554992.2|//PREDICTED: golgin candidate 6-like [Glycine max]
Aradu.P31VC	1486	165.64	40.09	2.79994	5.47e-36	Up	GO:0016020//membrane	GO:0016298//lipase activity	GO:0006629//lipid metabolic process	K01054//acylglycerol lipase [EC:3.1.1.23]	gi|357500381|ref|XP_003620479.1|//monoglyceride lipase [Medicago truncatula];gi|593704761|ref|XP_007152754.1|//hypothetical protein PHAVU_004G156600g [Phaseolus vulgaris]
Aradu.P33NE	789	605.4	333.26	1.61445	1.37303e-64	Up	NA	NA	GO:0050794//regulation of cellular process;GO:0044699//single-organism process;GO:0050896//response to stimulus;GO:0006351//transcription, DNA-templated	K14484//auxin-responsive protein IAA	gi|593782937|ref|XP_007154509.1|//hypothetical protein PHAVU_003G124600g [Phaseolus vulgaris]
Aradu.P34AE	1268	0	99.12	-6.8779	1.48845e-19	Down	NA	NA	NA	K05909//laccase [EC:1.10.3.2]	gi|723689023|ref|XP_010319213.1|//PREDICTED: uncharacterized protein LOC101255289 [Solanum lycopersicum]
Aradu.P39C1	2827	6196.16	35620	-1.77004	0	Down	NA	GO:0047216//inositol 3-alpha-galactosyltransferase activity	GO:0009409//response to cold;GO:0006012//galactose metabolic process	K18819//inositol 3-alpha-galactosyltransferase [EC:2.4.1.123]	gi|802691692|ref|XP_012082953.1|//PREDICTED: galactinol synthase 1 [Jatropha curcas]
Aradu.P5HL2	1751	567.67	265.69	1.84852	5.37082e-73	Up	NA	NA	NA	K00924;K02882//large subunit ribosomal protein L18Ae;K01381//saccharopepsin [EC:3.4.23.25]	gi|645234259|ref|XP_008223730.1|//PREDICTED: protein ASPARTIC PROTEASE IN GUARD CELL 2-like [Prunus mume]
Aradu.P68ES	1385	430	185	1.97002	1.70655e-60	Up	NA	NA	NA	K14826//FK506-binding nuclear protein [EC:5.2.1.8]	gi|502146321|ref|XP_004506402.1|//PREDICTED: peptidyl-prolyl cis-trans isomerase FKBP43-like isoform X1 [Cicer arietinum]
Aradu.P7H9H	2564	377.13	164.79	1.94764	1.76572e-52	Up	NA	NA	NA	K10352//myosin heavy chain;K20283//golgin subfamily A member 4	gi|734436718|gb|KHN48324.1|//Interactor of constitutive active ROPs 2, chloroplastic [Glycine soja]
Aradu.P7NHT	1024	133	88	1.34906	3.00453e-12	Up	NA	NA	NA	NA	gi|566203150|ref|XP_006375335.1|//hypothetical protein POPTR_0014s07830g [Populus trichocarpa]
Aradu.P81TA	1447	277.78	1118.03	-1.25574	6.96547e-49	Down	GO:0016021//integral component of membrane	GO:0008270//zinc ion binding	NA	NA	gi|703114054|ref|XP_010100542.1|//RING finger protein 141 [Morus notabilis];gi|359497085|ref|XP_002269005.2|//PREDICTED: uncharacterized protein LOC100244841 [Vitis vinifera]
Aradu.P8KI1	459	1050.38	772.07	1.19731	4.68431e-71	Up	NA	NA	NA	K03686//molecular chaperone DnaJ;K01956//carbamoyl-phosphate synthase small subunit [EC:6.3.5.5]	gi|593692284|ref|XP_007146684.1|//hypothetical protein PHAVU_006G060700g [Phaseolus vulgaris]
Aradu.P8P9U	645	1659.95	967.96	1.53133	1.36606e-161	Up	GO:0005576//extracellular region	NA	NA	K20412//peptidase inhibitor 16	gi|920682258|gb|KOM29030.1|//hypothetical protein LR48_Vigan627s007900 [Vigna angularis]
Aradu.P9IKS	2002	858.27	578.47	1.3224	6.83197e-68	Up	GO:0016021//integral component of membrane	GO:0004185//serine-type carboxypeptidase activity;GO:0016747//transferase activity, transferring acyl groups other than amino-acyl groups;GO:0016740//transferase activity	GO:0051603//proteolysis involved in cellular protein catabolic process;GO:0019748//secondary metabolic process	K16296//serine carboxypeptidase-like clade I [EC:3.4.16.-];K09756//serine carboxypeptidase-like 19 [EC:3.4.16.- 2.3.1.91]	gi|356504360|ref|XP_003520964.1|//PREDICTED: serine carboxypeptidase-like 11 isoform X2 [Glycine max];gi|828322033|ref|XP_012572937.1|//PREDICTED: serine carboxypeptidase-like 11 isoform X1 [Cicer arietinum]
Aradu.P9PXC	1083	98	411.82	-1.31795	2.07483e-20	Down	GO:0005737//cytoplasm	GO:0005094//Rho GDP-dissociation inhibitor activity	GO:0009932//cell tip growth;GO:0050790//regulation of catalytic activity;GO:0010053//root epidermal cell differentiation	K12462//Rho GDP-dissociation inhibitor	gi|920703122|gb|KOM46347.1|//hypothetical protein LR48_Vigan07g005100 [Vigna angularis]
Aradu.PAK8F	1522	180.27	891.66	-1.55313	1.23278e-53	Down	NA	GO:0004185//serine-type carboxypeptidase activity	GO:0006508//proteolysis	K05909//laccase [EC:1.10.3.2];K16297//serine carboxypeptidase-like clade II [EC:3.4.16.-]	gi|922339041|ref|XP_003621641.2|//serine carboxypeptidase-like protein [Medicago truncatula];gi|698582381|ref|XP_009777809.1|//PREDICTED: uncharacterized protein LOC104227286 [Nicotiana sylvestris]
Aradu.PC0BS	1402	1	110.93	-6.0403	2.62929e-22	Down	GO:0016020//membrane	GO:0015171//amino acid transmembrane transporter activity	GO:0003333//amino acid transmembrane transport	K19476//vacuolar protein sorting-associated protein IST1;K14209//solute carrier family 36 (proton-coupled amino acid transporter);K00021//hydroxymethylglutaryl-CoA reductase (NADPH) [EC:1.1.1.34];K15015//solute carrier family 32 (vesicular inhibitory amino acid transporter)	gi|356544365|ref|XP_003540623.1|//PREDICTED: lysine histidine transporter-like 8 [Glycine max];gi|950940631|ref|XP_014493233.1|//PREDICTED: lysine histidine transporter-like 8 [Vigna radiata var. radiata]
Aradu.PCF48	760	33	177	-1.67	4.03136e-13	Down	NA	NA	NA	NA	gi|593332203|ref|XP_007139527.1|//hypothetical protein PHAVU_008G037400g [Phaseolus vulgaris]
Aradu.PG28A	2124	540.59	361.85	1.33235	7.56268e-44	Up	NA	NA	NA	NA	gi|950955401|ref|XP_014496630.1|//PREDICTED: transcription factor TCP17-like [Vigna radiata var. radiata];gi|734331618|gb|KHN07132.1|//Transcription factor TCP13 [Glycine soja];gi|734355966|gb|KHN14028.1|//Transcription factor TCP13 [Glycine soja]
Aradu.PHP4N	843	60.61	24.65	2.05117	2.08551e-10	Up	NA	NA	NA	NA	NA
Aradu.PI7D5	1243	159.81	23	3.54986	1.03253e-42	Up	NA	NA	NA	NA	NA
Aradu.PIQ1Z	1003	20	146.7	-2.12159	9.14414e-15	Down	NA	NA	GO:0050794//regulation of cellular process;GO:0006950//response to stress;GO:0048583//regulation of response to stimulus	K13464//jasmonate ZIM domain-containing protein	gi|356555522|ref|XP_003546080.1|//PREDICTED: protein TIFY 5A-like [Glycine max]
Aradu.PJ6U1	901	402.07	294.2	1.20386	1.92999e-28	Up	NA	NA	GO:0006952//defense response	K03239//translation initiation factor eIF-2B subunit alpha	gi|951003618|ref|XP_014507651.1|//PREDICTED: protein LURP-one-related 17-like isoform X1 [Vigna radiata var. radiata]
Aradu.PM81Q	1032	195.68	700.36	-1.08639	3.87795e-25	Down	NA	NA	NA	K02542//DNA replication licensing factor MCM6 [EC:3.6.4.12];K15280//solute carrier family 35, member C2	gi|356567380|ref|XP_003551898.1|//PREDICTED: probable sugar phosphate/phosphate translocator At1g06470 [Glycine max];gi|947089299|gb|KRH37964.1|//hypothetical protein GLYMA_09G101300 [Glycine max];gi|734380385|gb|KHN22827.1|//Putative sugar phosphate/phosphate translocator [Glycine soja]
Aradu.PQ5HC	1656	400.69	258.51	1.38547	7.45559e-35	Up	GO:0005774//vacuolar membrane;GO:0016021//integral component of membrane;GO:0005886//plasma membrane	GO:0022857//transmembrane transporter activity	GO:0044763//single-organism cellular process;GO:0010817//regulation of hormone levels;GO:0055085//transmembrane transport;GO:0031325//positive regulation of cellular metabolic process;GO:0071840//cellular component organization or biogenesis	K00801//farnesyl-diphosphate farnesyltransferase [EC:2.5.1.21]	gi|356509972|ref|XP_003523716.1|//PREDICTED: protein WALLS ARE THIN 1-like [Glycine max]
Aradu.PR2BP	1347	17.14	104.33	-1.85251	1.80783e-09	Down	GO:0016021//integral component of membrane	GO:0102003//Delta8-sphingolipid desaturase activity	GO:0055114//oxidation-reduction process;GO:0006629//lipid metabolic process	K13076//Delta8-fatty-acid desaturase [EC:1.14.19.4]	gi|502158607|ref|XP_004511216.1|//PREDICTED: delta(8)-fatty-acid desaturase 1-like [Cicer arietinum]
Aradu.PRI0H	1245	1	305.29	-7.50083	1.71883e-54	Down	GO:0016021//integral component of membrane	GO:0017176//phosphatidylinositol N-acetylglucosaminyltransferase activity	NA	NA	gi|955342195|ref|XP_014617808.1|//PREDICTED: uncharacterized protein LOC106794654 [Glycine max]
Aradu.PS4CZ	1584	3922.21	3000.12	1.13985	1.43488e-241	Up	NA	GO:0004674//protein serine/threonine kinase activity;GO:0005524//ATP binding;GO:0016787//hydrolase activity	GO:0008152//metabolic process;GO:0006468//protein phosphorylation	K04733//interleukin-1 receptor-associated kinase 4 [EC:2.7.11.1];K14493//gibberellin receptor GID1 [EC:3.-.-.-]	gi|356575910|ref|XP_003556079.1|//PREDICTED: probable carboxylesterase 120 [Glycine max];gi|920692805|gb|KOM36030.1|//hypothetical protein LR48_Vigan02g218000 [Vigna angularis]
Aradu.PXM5A	1842	643.18	2807.22	-1.37264	7.52205e-138	Down	GO:0043231//intracellular membrane-bounded organelle	GO:0047215//indole-3-acetate beta-glucosyltransferase activity;GO:0080043//quercetin 3-O-glucosyltransferase activity;GO:0080044//quercetin 7-O-glucosyltransferase activity;GO:0047251//thiohydroximate beta-D-glucosyltransferase activity	GO:0009813//flavonoid biosynthetic process;GO:0019761//glucosinolate biosynthetic process;GO:0042742//defense response to bacterium;GO:0052544//defense response by callose deposition in cell wall;GO:0052696//flavonoid glucuronidation	K11820//N-hydroxythioamide S-beta-glucosyltransferase [EC:2.4.1.195]	gi|356498018|ref|XP_003517852.1|//PREDICTED: UDP-glycosyltransferase 74B1-like [Glycine max]
Aradu.PY4IT	606	1425.08	1034.43	1.21541	4.15367e-98	Up	NA	NA	NA	NA	gi|593692854|ref|XP_007146969.1|//hypothetical protein PHAVU_006G085800g [Phaseolus vulgaris]
Aradu.PZ2KX	1828	1420.8	1034.33	1.21121	2.71588e-97	Up	NA	GO:0016787//hydrolase activity	NA	K06889//uncharacterized protein	gi|920702285|gb|KOM45510.1|//hypothetical protein LR48_Vigan06g081600 [Vigna angularis]
Aradu.Q0YIY	2070	805.39	449.91	1.59326	8.10283e-84	Up	NA	GO:0016597//amino acid binding;GO:0051287//NAD binding;GO:0004617//phosphoglycerate dehydrogenase activity	GO:0006564//L-serine biosynthetic process;GO:0055114//oxidation-reduction process	K00058//D-3-phosphoglycerate dehydrogenase [EC:1.1.1.95]	gi|502120417|ref|XP_004496955.1|//PREDICTED: D-3-phosphoglycerate dehydrogenase 1, chloroplastic [Cicer arietinum]
Aradu.Q0YXR	1788	100.5	753.5	-2.15321	3.05353e-70	Down	NA	NA	NA	NA	gi|734427655|gb|KHN44332.1|//hypothetical protein glysoja_014373, partial [Glycine soja];gi|734400287|gb|KHN31361.1|//hypothetical protein glysoja_023015 [Glycine soja]
Aradu.Q1VWH	2129	2021.72	1677.63	1.02237	3.51872e-105	Up	GO:0016021//integral component of membrane	GO:0005215//transporter activity	GO:0006810//transport	K14638//solute carrier family 15 (peptide/histidine transporter), member 3/4	gi|356504645|ref|XP_003521106.1|//PREDICTED: protein NRT1/ PTR FAMILY 3.1 [Glycine max]
Aradu.Q21Y2	1619	216.03	145.08	1.32759	1.99829e-18	Up	NA	GO:0004674//protein serine/threonine kinase activity;GO:0005524//ATP binding;GO:0000166//nucleotide binding;GO:0004672//protein kinase activity	GO:0006468//protein phosphorylation	K04733//interleukin-1 receptor-associated kinase 4 [EC:2.7.11.1]	gi|955369108|ref|XP_014623058.1|//PREDICTED: receptor-like cytosolic serine/threonine-protein kinase RBK2 [Glycine max];gi|955358588|ref|XP_014621222.1|//PREDICTED: receptor-like cytosolic serine/threonine-protein kinase RBK2 isoform X1 [Glycine max]
Aradu.Q350M	2126	312.76	219.74	1.26247	4.11585e-24	Up	GO:0005829//cytosol	GO:0005524//ATP binding;GO:0042803//protein homodimerization activity;GO:0004066//asparagine synthase (glutamine-hydrolyzing) activity	GO:0070981//L-asparagine biosynthetic process;GO:0006541//glutamine metabolic process;GO:0009646//response to absence of light;GO:0006529//asparagine biosynthetic process	K01953//asparagine synthase (glutamine-hydrolysing) [EC:6.3.5.4]	gi|502129378|ref|XP_004500279.1|//PREDICTED: asparagine synthetase, nodule [glutamine-hydrolyzing] [Cicer arietinum]
Aradu.Q3CBB	2124	258.56	158.32	1.46086	7.32886e-25	Up	GO:0005887//integral component of plasma membrane	GO:0005355//glucose transmembrane transporter activity;GO:0005351//sugar:proton symporter activity	GO:0046323//glucose import;GO:0015992//proton transport;GO:1904659//glucose transmembrane transport	K08150//MFS transporter, SP family, solute carrier family 2 (myo-inositol transporter), member 13	gi|90954408|emb|CAJ29291.1|//putative polyol transporter protein 4 [Lotus japonicus]
Aradu.Q6ITY	2503	257.06	928.06	-1.09891	2.36831e-33	Down	NA	GO:0008568//microtubule-severing ATPase activity;GO:0008270//zinc ion binding	NA	K17285//selenium-binding protein 1;K11000//callose synthase [EC:2.4.1.-]	gi|951005524|ref|XP_014508175.1|//PREDICTED: pentatricopeptide repeat-containing protein At4g16835, mitochondrial [Vigna radiata var. radiata];gi|502152498|ref|XP_004508953.1|//PREDICTED: pentatricopeptide repeat-containing protein At4g16835, mitochondrial [Cicer arietinum]
Aradu.Q7IXG	913	360.63	1236.9	-1.02493	2.31555e-39	Down	GO:0005759//mitochondrial matrix	NA	NA	K15414//complement component 1 Q subcomponent-binding protein, mitochondrial	gi|356553032|ref|XP_003544862.1|//PREDICTED: mitochondrial acidic protein mam33-like [Glycine max]
Aradu.Q86YJ	1404	3441.66	2090.22	1.47266	0	Up	NA	NA	NA	NA	gi|734379280|gb|KHN22444.1|//hypothetical protein glysoja_024953 [Glycine soja]
Aradu.Q8JL3	2793	196.01	814.68	-1.3021	4.57385e-38	Down	NA	GO:0016757//transferase activity, transferring glycosyl groups	NA	K06617//raffinose synthase [EC:2.4.1.82]	gi|356513695|ref|XP_003525546.1|//PREDICTED: galactinol--sucrose galactosyltransferase-like [Glycine max]
Aradu.Q8UNU	1752	69.95	1114.86	-3.24119	1.6786e-159	Down	GO:0005783//endoplasmic reticulum;GO:0044425//membrane part	GO:0046872//metal ion binding	NA	K08054//calnexin	gi|502139546|ref|XP_004503810.1|//PREDICTED: calnexin homolog [Cicer arietinum]
Aradu.QA3W8	1799	11	635.54	-5.0992	1.35161e-118	Down	NA	NA	NA	K11721//bromodomain-containing protein 3	gi|659108897|ref|XP_008454445.1|//PREDICTED: transcription factor GTE7 [Cucumis melo];gi|920712670|gb|KOM53919.1|//hypothetical protein LR48_Vigan09g257800 [Vigna angularis]
Aradu.QC0XQ	1492	4.53	153.26	-4.32712	3.62386e-28	Down	GO:0005634//nucleus;GO:0005829//cytosol;GO:0008540//proteasome regulatory particle, base subcomplex	GO:0031593//polyubiquitin binding	GO:0043248//proteasome assembly;GO:0043161//proteasome-mediated ubiquitin-dependent protein catabolic process	K03029//26S proteasome regulatory subunit N10	gi|947128789|gb|KRH76643.1|//hypothetical protein GLYMA_01G165100 [Glycine max]
Aradu.QD6T9	2683	712	207	2.53545	2.04652e-134	Up	NA	GO:0043565//sequence-specific DNA binding;GO:0003700//transcription factor activity, sequence-specific DNA binding	GO:0006355//regulation of transcription, DNA-templated;GO:0006351//transcription, DNA-templated	K14431//transcription factor TGA	gi|502120881|ref|XP_004497114.1|//PREDICTED: transcription factor HBP-1b(c38)-like isoform X2 [Cicer arietinum];gi|922408249|ref|XP_013470215.1|//BZIP family transcription factor [Medicago truncatula]
Aradu.QE1MY	846	6	576	-5.83176	3.47459e-109	Down	GO:0016020//membrane;GO:0016021//integral component of membrane	GO:0008422//beta-glucosidase activity;GO:0046872//metal ion binding;GO:0036459//thiol-dependent ubiquitinyl hydrolase activity	GO:0006511//ubiquitin-dependent protein catabolic process;GO:1901657//glycosyl compound metabolic process;GO:0016579//protein deubiquitination	K19964//hydroxyisourate hydrolase [EC:3.5.2.17];K11855//ubiquitin carboxyl-terminal hydrolase 36/42 [EC:3.4.19.12]	gi|593375907|ref|XP_007140262.1|//hypothetical protein PHAVU_008G097300g [Phaseolus vulgaris];gi|734336512|gb|KHN08238.1|//Ubiquitin carboxyl-terminal hydrolase 16 [Glycine soja]
Aradu.QI5GI	2102	754.31	392.89	1.69424	1.11971e-85	Up	NA	GO:0016746//transferase activity, transferring acyl groups;GO:0016740//transferase activity;GO:0016747//transferase activity, transferring acyl groups other than amino-acyl groups	NA	K14329//agmatine coumaroyltransferase [EC:2.3.1.64 2.3.1.-];K13264//isoflavone 7-O-glucoside-6''-O-malonyltransferase [EC:2.3.1.115]	gi|356526530|ref|XP_003531870.1|//PREDICTED: coumaroyl-CoA:anthocyanidin 3-O-glucoside-6''-O-coumaroyltransferase 1-like [Glycine max];gi|920693535|gb|KOM36760.1|//hypothetical protein LR48_Vigan03g014100 [Vigna angularis];gi|922341413|ref|XP_013447660.1|//anthocyanin 5-aromatic acyltransferase [Medicago truncatula]
Aradu.QJ19Z	600	6	39.69	-1.97253	6.82966e-05	Down	NA	NA	NA	K13993//HSP20 family protein	gi|802630117|ref|XP_012077224.1|//PREDICTED: 18.8 kDa class II heat shock protein-like [Jatropha curcas]
Aradu.QK488	1516	400	1444	-1.09879	5.70284e-51	Down	NA	NA	NA	K12236//transcriptional repressor NF-X1	gi|965664128|dbj|BAT79837.1|//hypothetical protein VIGAN_02277700 [Vigna angularis var. angularis]
Aradu.QLP22	1144	835.71	360.3	1.96701	7.49174e-116	Up	NA	NA	NA	K04733//interleukin-1 receptor-associated kinase 4 [EC:2.7.11.1];K16219//protein N-terminal methyltransferase [EC:2.1.1.244];K08235//xyloglucan:xyloglucosyl transferase [EC:2.4.1.207]	gi|356572952|ref|XP_003554629.1|//PREDICTED: F-box protein PP2-B15-like [Glycine max]
Aradu.QMM7L	1777	309.53	45.62	3.51555	1.28364e-80	Up	GO:0005634//nucleus;GO:0005777//peroxisome	GO:0004674//protein serine/threonine kinase activity;GO:0005524//ATP binding	GO:0006468//protein phosphorylation;GO:0046777//protein autophosphorylation	K04733//interleukin-1 receptor-associated kinase 4 [EC:2.7.11.1]	gi|951042443|ref|XP_014518166.1|//PREDICTED: receptor-like cytosolic serine/threonine-protein kinase RBK2 [Vigna radiata var. radiata];gi|920712258|gb|KOM53507.1|//hypothetical protein LR48_Vigan09g216600 [Vigna angularis]
Aradu.QN5ZJ	1895	353.98	101.43	2.55639	3.19961e-68	Up	GO:0005634//nucleus	NA	NA	K05868//cyclin B	gi|502098357|ref|XP_004491216.1|//PREDICTED: G2/mitotic-specific cyclin S13-7 [Cicer arietinum];gi|734346207|gb|KHN11018.1|//G2/mitotic-specific cyclin-1 [Glycine soja]
Aradu.QQ49L	1292	261	30	3.87422	4.67402e-73	Up	NA	GO:0016787//hydrolase activity	NA	NA	gi|593331462|ref|XP_007139157.1|//hypothetical protein PHAVU_008G006100g [Phaseolus vulgaris];gi|955385550|ref|XP_014626625.1|//PREDICTED: uncharacterized protein LOC100805737 [Glycine max];gi|388514297|gb|AFK45210.1|//unknown [Lotus japonicus];gi|734364562|gb|KHN17309.1|//hypothetical protein glysoja_036914 [Glycine soja]
Aradu.QS20K	1733	216.7	98.86	1.88545	1.28797e-29	Up	GO:0016021//integral component of membrane	GO:0020037//heme binding;GO:0070330//aromatase activity;GO:0005506//iron ion binding	GO:0055114//oxidation-reduction process	K20665//jasmonoyl-isoleucine 12-hydroxylase [EC:1.14.-.-];K20624//12-hydroxyjasmonoyl-L-isoleucine oxidase / fatty acid hydroxylase [EC:1.14.-.-]	gi|502145722|ref|XP_004506151.1|//PREDICTED: cytochrome P450 94C1 [Cicer arietinum]
Aradu.QSH92	2057	5992.88	29244.3	-1.53363	0	Down	GO:0016020//membrane	GO:0004190//aspartic-type endopeptidase activity	GO:0006508//proteolysis;GO:0030163//protein catabolic process;GO:0006629//lipid metabolic process	K08245//phytepsin [EC:3.4.23.40]	gi|356532081|ref|XP_003534602.1|//PREDICTED: aspartic proteinase A1 [Glycine max];gi|734410996|gb|KHN35722.1|//Aspartic proteinase [Glycine soja]
Aradu.QSW68	1578	226	803	-1.07587	3.74235e-28	Down	GO:0009505//plant-type cell wall;GO:0009506//plasmodesma	GO:0052887//7,9,9'-tricis-neurosporene:quinone oxidoreductase activity;GO:0052886//9,9'-dicis-carotene:quinone oxidoreductase activity;GO:0016788//hydrolase activity, acting on ester bonds	GO:0052889//9,9'-di-cis-zeta-carotene desaturation to 7,9,7',9'-tetra-cis-lycopene;GO:0055114//oxidation-reduction process	K01206//alpha-L-fucosidase [EC:3.2.1.51]	gi|356558821|ref|XP_003547701.1|//PREDICTED: GDSL esterase/lipase At5g14450 [Glycine max]
Aradu.QT618	2131	698.12	5467.23	-2.21606	0	Down	NA	GO:0004357//glutamate-cysteine ligase activity;GO:0016874//ligase activity	GO:0042398//cellular modified amino acid biosynthetic process;GO:0006750//glutathione biosynthetic process	K01919//glutamate--cysteine ligase [EC:6.3.2.2]	gi|356495680|ref|XP_003516702.1|//PREDICTED: glutamate--cysteine ligase, chloroplastic-like [Glycine max];gi|357481601|ref|XP_003611086.1|//glutamate-cysteine ligase B [Medicago truncatula]
Aradu.QV0NG	2240	1262.67	912.15	1.22234	7.09683e-88	Up	GO:0005887//integral component of plasma membrane	GO:0005249//voltage-gated potassium channel activity	GO:0071805//potassium ion transmembrane transport;GO:0042391//regulation of membrane potential	K05391//cyclic nucleotide gated channel, other eukaryote	gi|593254861|ref|XP_007132934.1|//hypothetical protein PHAVU_011G137200g [Phaseolus vulgaris]
Aradu.QVN0R	1472	3611.71	2533.81	1.26458	4.25816e-262	Up	NA	GO:0016866//intramolecular transferase activity	GO:0030244//cellulose biosynthetic process	K13379//reversibly glycosylated polypeptide / UDP-arabinopyranose mutase [EC:2.4.1.- 5.4.99.30]	gi|697100367|ref|XP_009590755.1|//PREDICTED: alpha-1,4-glucan-protein synthase [UDP-forming] 2-like [Nicotiana tomentosiformis]
Aradu.QW2YT	864	94.9	789.87	-2.30393	8.59423e-80	Down	NA	NA	NA	K12741//heterogeneous nuclear ribonucleoprotein A1/A3;K14651//transcription initiation factor TFIID subunit 15	gi|351722069|ref|NP_001237487.1|//abscisic stress ripening-like protein [Glycine max]
Aradu.QXJ49	1449	1624.22	1187.7	1.20478	4.38381e-110	Up	NA	NA	NA	K13346//peroxin-10	gi|734365331|gb|KHN17710.1|//hypothetical protein glysoja_005907 [Glycine soja]
Aradu.QYL3B	729	112	52	1.86012	7.50712e-16	Up	NA	NA	NA	NA	gi|357446141|ref|XP_003593348.1|//hypothetical protein MTR_2g010490 [Medicago truncatula];gi|356546724|ref|XP_003541773.1|//PREDICTED: uncharacterized protein LOC100810951 [Glycine max]
Aradu.QZ6DW	2010	2072.91	1703.9	1.03602	3.77643e-110	Up	GO:0005829//cytosol;GO:0016021//integral component of membrane	GO:0046538//2,3-bisphosphoglycerate-dependent phosphoglycerate mutase activity	GO:0006094//gluconeogenesis;GO:0006096//glycolytic process;GO:0043456//regulation of pentose-phosphate shunt	K01834//2,3-bisphosphoglycerate-dependent phosphoglycerate mutase [EC:5.4.2.11]	gi|955315956|ref|XP_014630077.1|//PREDICTED: 2,3-bisphosphoglycerate-dependent phosphoglycerate mutase-like isoform X1 [Glycine max];gi|922381252|ref|XP_013460855.1|//phosphoglycerate/bisphosphoglycerate mutase family protein [Medicago truncatula]
Aradu.R03U9	1645	107	571	-1.66267	2.2325e-38	Down	GO:0005685//U1 snRNP;GO:0043229//intracellular organelle	GO:0003729//mRNA binding	GO:0006376//mRNA splice site selection	K06674//structural maintenance of chromosome 2	gi|951063096|ref|XP_014523201.1|//PREDICTED: putative RNA-binding protein Luc7-like 2 [Vigna radiata var. radiata];gi|778668130|ref|XP_011649045.1|//PREDICTED: putative RNA-binding protein Luc7-like 2 isoform X3 [Cucumis sativus];gi|703116823|ref|XP_010101230.1|//hypothetical protein L484_005579 [Morus notabilis];gi|700206243|gb|KGN61362.1|//hypothetical protein Csa_2G099460 [Cucumis sativus];gi|…
Aradu.R25G5	2400	243.89	195.24	1.07419	3.41954e-15	Up	GO:0016021//integral component of membrane	NA	NA	NA	gi|502152911|ref|XP_004509149.1|//PREDICTED: uncharacterized membrane protein At3g27390 [Cicer arietinum]
Aradu.R2ERN	1357	11	177	-3.25497	8.87495e-27	Down	GO:0005887//integral component of plasma membrane	GO:0015250//water channel activity;GO:0015254//glycerol channel activity	GO:0006833//water transport;GO:0071702//organic substance transport;GO:0046713//borate transport;GO:0034220//ion transmembrane transport;GO:0009992//cellular water homeostasis;GO:0015793//glycerol transport;GO:0044765//single-organism transport	K09874//aquaporin NIP	gi|502080593|ref|XP_004486614.1|//PREDICTED: aquaporin NIP6-1-like [Cicer arietinum]
Aradu.R3DJ0	1085	74	0	7.96266	2.21382e-22	Up	NA	GO:0003985//acetyl-CoA C-acetyltransferase activity	GO:0008152//metabolic process	K00626//acetyl-CoA C-acetyltransferase [EC:2.3.1.9]	gi|657984204|ref|XP_008384188.1|//PREDICTED: acetyl-CoA acetyltransferase, cytosolic 1 isoform X1 [Malus domestica];gi|694399435|ref|XP_009374846.1|//PREDICTED: probable acetyl-CoA acetyltransferase, cytosolic 2 isoform X2 [Pyrus x bretschneideri]
Aradu.R3KCC	1646	108.65	508.11	-1.47225	5.06108e-29	Down	GO:0016021//integral component of membrane	GO:0008810//cellulase activity	GO:0030245//cellulose catabolic process	K01179//endoglucanase [EC:3.2.1.4];K20471//coatomer subunit delta;K08832//serine/threonine-protein kinase SRPK3 [EC:2.7.11.1]	gi|703105967|ref|XP_010098378.1|//Endoglucanase 16 [Morus notabilis]
Aradu.R3V2L	1057	18	300	-3.30569	8.25741e-45	Down	GO:0005737//cytoplasm	GO:0004081//bis(5'-nucleosyl)-tetraphosphatase (asymmetrical) activity;GO:0004843//thiol-dependent ubiquitin-specific protease activity;GO:0008893//guanosine-3',5'-bis(diphosphate) 3'-diphosphatase activity	GO:0006511//ubiquitin-dependent protein catabolic process;GO:0016579//protein deubiquitination;GO:0015967//diadenosine tetraphosphate catabolic process	K05609//ubiquitin carboxyl-terminal hydrolase L3 [EC:3.4.19.12]	gi|947089534|gb|KRH38199.1|//hypothetical protein GLYMA_09G117600 [Glycine max];gi|734341682|gb|KHN09850.1|//Ubiquitin carboxyl-terminal hydrolase isozyme L3 [Glycine soja]
Aradu.R403Z	2153	98.5	750.75	-2.17693	6.19736e-71	Down	NA	GO:0016874//ligase activity	GO:0008152//metabolic process	K00666//fatty-acyl-CoA synthase [EC:6.2.1.-];K10526//OPC-8:0 CoA ligase 1 [EC:6.2.1.-]	gi|571437842|ref|XP_006574350.1|//PREDICTED: uncharacterized protein LOC100500429 isoform X1 [Glycine max]
Aradu.R44TI	1329	33	443.04	-2.99369	6.63949e-60	Down	NA	NA	NA	K07466//replication factor A1	gi|357491997|ref|XP_003616287.1|//replication factor-A carboxy-terminal domain protein [Medicago truncatula]
Aradu.R4F90	1364	12	455.6	-4.49345	6.32241e-82	Down	NA	NA	NA	K06268//serine/threonine-protein phosphatase 2B regulatory subunit;K18328//lariat debranching enzyme [EC:3.1.-.-]	gi|357479975|ref|XP_003610273.1|//zein-binding protein [Medicago truncatula]
Aradu.R4V03	3388	1121.55	4871.59	-1.36569	2.50665e-236	Down	GO:0044611//nuclear pore inner ring	GO:0017056//structural constituent of nuclear pore	GO:0006999//nuclear pore organization;GO:0000059//protein import into nucleus, docking	K11294//nucleolin	gi|571445566|ref|XP_006576839.1|//PREDICTED: uncharacterized protein LOC100777738 isoform X1 [Glycine max]
Aradu.R70ZF	452	296.99	177	1.49987	2.26066e-29	Up	NA	GO:0016597//amino acid binding;GO:0046983//protein dimerization activity	GO:0008152//metabolic process	NA	gi|922357194|ref|XP_003616743.2|//transcription factor bHLH93-like protein [Medicago truncatula]
Aradu.R77UT	1261	116.25	432.83	-1.14336	2.0344e-17	Down	NA	GO:0008080//N-acetyltransferase activity	NA	NA	gi|388498350|gb|AFK37241.1|//unknown [Lotus japonicus]
Aradu.R79FV	1028	720	2537	-1.06385	6.66433e-84	Down	NA	NA	NA	NA	NA
Aradu.R7CC6	1047	544.1	368	1.31737	2.17776e-43	Up	GO:0005634//nucleus	GO:0043565//sequence-specific DNA binding;GO:0008483//transaminase activity;GO:0003700//transcription factor activity, sequence-specific DNA binding	GO:0006355//regulation of transcription, DNA-templated	K09338//homeobox-leucine zipper protein	gi|470103473|ref|XP_004288161.1|//PREDICTED: homeobox-leucine zipper protein ATHB-6-like isoform X2 [Fragaria vesca subsp. vesca]
Aradu.R7JCU	1380	119.41	649.81	-1.69089	1.86453e-44	Down	NA	NA	NA	NA	gi|255646286|gb|ACU23627.1|//unknown [Glycine max];gi|356564188|ref|XP_003550338.1|//PREDICTED: uncharacterized protein LOC100814610 isoform X1 [Glycine max]
Aradu.R9ICM	1728	2444.04	1041.88	1.98329	0	Up	GO:0044444//cytoplasmic part	NA	GO:0044699//single-organism process	K17262//tubulin-folding cofactor B	gi|922400587|ref|XP_013467430.1|//tubulin folding cofactor B [Medicago truncatula];gi|388508528|gb|AFK42330.1|//unknown [Lotus japonicus];gi|828335400|ref|XP_012575417.1|//PREDICTED: tubulin-folding cofactor B isoform X1 [Cicer arietinum]
Aradu.R9Y8J	1825	338.99	167.73	1.76831	9.97829e-42	Up	NA	NA	NA	NA	gi|502160696|ref|XP_004511853.1|//PREDICTED: UPF0553 protein-like [Cicer arietinum]
Aradu.RA346	940	0	399.27	-8.88801	1.18049e-61	Down	GO:0016020//membrane	GO:0003824//catalytic activity	GO:0008152//metabolic process	K07574//RNA-binding protein	gi|734350526|gb|KHN12473.1|//L-Ala-D/L-Glu epimerase [Glycine soja];gi|502107501|ref|XP_004493283.1|//PREDICTED: uncharacterized protein LOC101489167 [Cicer arietinum]
Aradu.RAP3E	570	1845	1427.23	1.12361	7.64121e-112	Up	NA	NA	NA	NA	gi|734433471|gb|KHN46726.1|//hypothetical protein glysoja_014977 [Glycine soja]
Aradu.RB14Z	2507	180.43	1566.46	-2.36479	1.27122e-161	Down	NA	NA	NA	K12133//MYB-related transcription factor LHY	gi|734338396|gb|KHN08771.1|//Myb-like protein G [Glycine soja]
Aradu.RB83Y	3950	292.37	1012.48	-1.03882	3.30364e-33	Down	GO:0005960//glycine cleavage complex;GO:0005829//cytosol;GO:0005739//mitochondrion	GO:0016594//glycine binding;GO:0004375//glycine dehydrogenase (decarboxylating) activity	GO:0019464//glycine decarboxylation via glycine cleavage system;GO:0055114//oxidation-reduction process	K00281//glycine dehydrogenase [EC:1.4.4.2]	gi|950991400|ref|XP_014504509.1|//PREDICTED: glycine dehydrogenase (decarboxylating), mitochondrial [Vigna radiata var. radiata]
Aradu.RBD4B	2899	414	65.97	3.40296	1.41158e-104	Up	NA	NA	NA	NA	NA
Aradu.RBT52	3556	843.58	3409.51	-1.26176	6.52487e-147	Down	GO:0005737//cytoplasm;GO:0009570//chloroplast stroma	GO:0005524//ATP binding	GO:0016485//protein processing;GO:0009658//chloroplast organization;GO:0009408//response to heat	K03695//ATP-dependent Clp protease ATP-binding subunit ClpB	gi|302793610|ref|XP_002978570.1|//hypothetical protein SELMODRAFT_176984 [Selaginella moellendorffii];gi|734354139|gb|KHN13577.1|//Chaperone protein ClpB3, chloroplastic [Glycine soja];gi|734306108|gb|KHM98801.1|//Chaperone protein ClpB3, chloroplastic [Glycine soja]
Aradu.RCQ63	1757	1020.8	81.6	4.39819	2.91985e-302	Up	NA	GO:0016798//hydrolase activity, acting on glycosyl bonds	GO:0008152//metabolic process	K01179//endoglucanase [EC:3.2.1.4]	gi|356541382|ref|XP_003539156.1|//PREDICTED: uncharacterized protein LOC100816102 [Glycine max]
Aradu.RD48R	573	17	93	-1.69849	7.76213e-08	Down	NA	NA	NA	NA	NA
Aradu.RDQ06	438	52	177	-1.01396	5.69547e-07	Down	NA	NA	GO:0050832//defense response to fungus;GO:0042742//defense response to bacterium	NA	gi|684194203|gb|AIN56735.1|//pseudo-hevein, partial [Dipteryx odorata]
Aradu.RE11W	990	146	79	1.63925	3.61555e-17	Up	NA	NA	NA	NA	gi|356527292|ref|XP_003532245.1|//PREDICTED: uncharacterized protein LOC100805674 [Glycine max];gi|356567735|ref|XP_003552072.1|//PREDICTED: uncharacterized protein LOC100808210 [Glycine max]
Aradu.RE2WJ	1052	249.48	165	1.34966	1.61743e-21	Up	GO:0005634//nucleus	GO:0004674//protein serine/threonine kinase activity;GO:0005524//ATP binding	GO:0006355//regulation of transcription, DNA-templated;GO:0006468//protein phosphorylation	K02206//cyclin-dependent kinase 2 [EC:2.7.11.22]	gi|356507433|ref|XP_003522471.1|//PREDICTED: uncharacterized protein LOC100527074 [Glycine max];gi|951069277|ref|XP_014490133.1|//PREDICTED: cell division control protein 2 homolog [Vigna radiata var. radiata];gi|734331445|gb|KHN07044.1|//SAP30-binding protein [Glycine soja]
Aradu.RFH8Y	1262	84	428.7	-1.5983	1.04786e-27	Down	GO:0005737//cytoplasm	GO:0004364//glutathione transferase activity	GO:0006749//glutathione metabolic process;GO:0009407//toxin catabolic process	K00799//glutathione S-transferase [EC:2.5.1.18]	gi|1000964164|ref|XP_002520166.2|//PREDICTED: pentatricopeptide repeat-containing protein At1g05670, mitochondrial [Ricinus communis];gi|694361437|ref|XP_009360416.1|//PREDICTED: glutathione S-transferase U17-like [Pyrus x bretschneideri]
Aradu.RPN4J	1565	288.58	209.72	1.21371	3.93058e-21	Up	GO:0005669//transcription factor TFIID complex	GO:0003677//DNA binding;GO:0003682//chromatin binding;GO:0043565//sequence-specific DNA binding;GO:0001129//RNA polymerase II transcription factor activity, TBP-class protein binding, involved in preinitiation complex assembly;GO:0001075//transcription factor activity, RNA polymerase II core promoter sequence-specific binding involved in preinitiation complex assembly;GO:0044212//transcription re…	GO:0019538//protein metabolic process;GO:0045944//positive regulation of transcription from RNA polymerase II promoter;GO:0006366//transcription from RNA polymerase II promoter	K03128//transcription initiation factor TFIID subunit 2	gi|734344334|gb|KHN10419.1|//Transcription initiation factor TFIID subunit 2 [Glycine soja];gi|593784215|ref|XP_007155148.1|//hypothetical protein PHAVU_003G177400g [Phaseolus vulgaris];gi|502151710|ref|XP_004508575.1|//PREDICTED: transcription initiation factor TFIID subunit 2 isoform X1 [Cicer arietinum]
Aradu.RQF3U	2083	221	180	1.04926	1.82246e-13	Up	NA	GO:0003677//DNA binding	NA	K16670//homeobox protein Meis2;K15613//homeobox protein Meis1	gi|388556558|ref|NP_001253999.1|//homeobox protein knotted-1-like 2-like [Glycine max];gi|950994064|ref|XP_014505047.1|//PREDICTED: homeobox protein knotted-1-like 1 isoform X2 [Vigna radiata var. radiata]
Aradu.RQH3E	1753	89.69	394.22	-1.38278	5.59844e-21	Down	NA	NA	NA	K12133//MYB-related transcription factor LHY	gi|563425572|gb|AHB59600.1|//putative MYB-related protein 13 [Arachis hypogaea]
Aradu.RR85L	992	120	17	3.57263	1.23626e-32	Up	GO:0016020//membrane	NA	NA	NA	gi|571555930|ref|XP_006604188.1|//PREDICTED: uncharacterized protein LOC102661637 [Glycine max]
Aradu.RSI8W	1098	90.6	6	4.66968	5.6312e-29	Up	NA	NA	NA	K12605//CCR4-NOT transcription complex subunit 2	gi|920708765|gb|KOM50762.1|//hypothetical protein LR48_Vigan08g158900 [Vigna angularis];gi|1000944799|ref|XP_015581510.1|//PREDICTED: probable NOT transcription complex subunit VIP2 isoform X2 [Ricinus communis]
Aradu.RSX9K	6721	1329.82	66	5.08583	0	Up	NA	NA	NA	K07466//replication factor A1	gi|947057797|gb|KRH07203.1|//hypothetical protein GLYMA_16G074500 [Glycine max];gi|828328027|ref|XP_012573993.1|//PREDICTED: uncharacterized protein LOC101506477 isoform X1 [Cicer arietinum];gi|828328029|ref|XP_012573994.1|//PREDICTED: uncharacterized protein LOC101506477 isoform X2 [Cicer arietinum];gi|922329455|ref|XP_003628568.2|//replication factor-A carboxy-terminal domain protein [Medicago …
Aradu.RU8HS	1356	112.02	472.03	-1.32192	2.98779e-23	Down	GO:0009506//plasmodesma;GO:0046658//anchored component of plasma membrane	GO:0004871//signal transducer activity	GO:0006952//defense response	NA	gi|502112119|ref|XP_004494244.1|//PREDICTED: protein YLS9-like [Cicer arietinum]
Aradu.RUP8Q	960	209.59	0	9.46463	6.11808e-51	Up	GO:0016020//membrane	NA	NA	K04567//lysyl-tRNA synthetase, class II [EC:6.1.1.6];K13466//EIX receptor 1/2;K03021//DNA-directed RNA polymerase III subunit RPC2 [EC:2.7.7.6];K19613//leucine-rich repeat protein SHOC2	gi|955383326|ref|XP_014626113.1|//PREDICTED: LRR receptor-like serine/threonine-protein kinase GSO2 [Glycine max]
Aradu.RVP3T	2312	425	2021.04	-1.49636	2.86676e-113	Down	NA	GO:0004674//protein serine/threonine kinase activity;GO:0005524//ATP binding;GO:0005509//calcium ion binding;GO:0016740//transferase activity	GO:0006468//protein phosphorylation	K13066//caffeic acid 3-O-methyltransferase [EC:2.1.1.68];K00924;K05279//flavonol 3-O-methyltransferase [EC:2.1.1.76];K13412//calcium-dependent protein kinase [EC:2.7.11.1];K15190//7SK snRNA methylphosphate capping enzyme [EC:2.1.1.-];K09838//zeaxanthin epoxidase [EC:1.14.15.21];K12643//anthranilate N-methyltransferase [EC:2.1.1.111]	gi|388512375|gb|AFK44249.1|//unknown [Lotus japonicus]
Aradu.RWI1K	2311	826.14	590.94	1.23658	4.37234e-59	Up	GO:0016021//integral component of membrane;GO:0005886//plasma membrane	GO:0004674//protein serine/threonine kinase activity;GO:0005524//ATP binding;GO:0030247//polysaccharide binding	GO:0006468//protein phosphorylation;GO:0007166//cell surface receptor signaling pathway	K04733//interleukin-1 receptor-associated kinase 4 [EC:2.7.11.1]	gi|351725755|ref|NP_001235056.1|//protein kinase-related protein precursor [Glycine max]
Aradu.RY6N7	1236	7.5	7098.3	-9.13316	0	Down	GO:0016020//membrane;GO:0012505//endomembrane system	GO:0020037//heme binding;GO:0016491//oxidoreductase activity	NA	K17278//membrane-associated progesterone receptor component	gi|356575951|ref|XP_003556099.1|//PREDICTED: membrane steroid-binding protein 1-like [Glycine max]
Aradu.RYB4L	2157	1722.98	1240.44	1.22726	4.29679e-120	Up	NA	NA	NA	K14487//auxin responsive GH3 gene family	gi|356504890|ref|XP_003521227.1|//PREDICTED: probable indole-3-acetic acid-amido synthetase GH3.6 [Glycine max]
Aradu.RYN4L	495	4712.42	3778.66	1.0718	1.2521e-262	Up	NA	NA	NA	K13993//HSP20 family protein	gi|720021314|ref|XP_010262690.1|//PREDICTED: 17.3 kDa class I heat shock protein-like [Nelumbo nucifera]
Aradu.RYS1S	1386	40.2	169.45	-1.32239	1.99548e-09	Down	GO:0005634//nucleus	GO:0043565//sequence-specific DNA binding;GO:0003700//transcription factor activity, sequence-specific DNA binding	GO:0006355//regulation of transcription, DNA-templated	K14494//DELLA protein	gi|356514974|ref|XP_003526176.1|//PREDICTED: scarecrow-like protein 21 [Glycine max]
Aradu.S0A8H	269	13.28	0	4.93842	9.49886e-06	Up	GO:0016021//integral component of membrane	GO:0008422//beta-glucosidase activity	GO:1901657//glycosyl compound metabolic process;GO:0005975//carbohydrate metabolic process	K05350//beta-glucosidase [EC:3.2.1.21]	gi|947062140|gb|KRH11401.1|//hypothetical protein GLYMA_15G106000 [Glycine max]
Aradu.S166E	1151	101.82	423.69	-1.30378	1.24739e-20	Down	GO:0016021//integral component of membrane	NA	GO:0006952//defense response	NA	gi|356496281|ref|XP_003516997.1|//PREDICTED: protein LURP-one-related 15-like [Glycine max]
Aradu.S1EHV	1408	217	1367	-1.90204	1.25957e-107	Down	GO:0000228//nuclear chromosome;GO:0032301//MutSalpha complex	GO:0032137//guanine/thymine mispair binding;GO:0005524//ATP binding;GO:0003684//damaged DNA binding;GO:0032138//single base insertion or deletion binding;GO:0000400//four-way junction DNA binding	GO:0000710//meiotic mismatch repair;GO:0045910//negative regulation of DNA recombination;GO:0007131//reciprocal meiotic recombination;GO:0009411//response to UV;GO:0043570//maintenance of DNA repeat elements	K08737//DNA mismatch repair protein MSH6	gi|566203820|ref|XP_002320307.2|//DNA mismatch repair protein MSH6-1 [Populus trichocarpa];gi|802689824|ref|XP_012082881.1|//PREDICTED: DNA mismatch repair protein MSH6 [Jatropha curcas];gi|965604525|dbj|BAT91701.1|//hypothetical protein VIGAN_07031900 [Vigna angularis var. angularis]
Aradu.S3MQ8	1422	156.5	109	1.27504	4.45478e-13	Up	GO:0009523//photosystem II;GO:0019898//extrinsic component of membrane;GO:0009654//photosystem II oxygen evolving complex	GO:0005509//calcium ion binding	GO:0015979//photosynthesis	K09264//MADS-box transcription factor, plant	gi|950971227|ref|XP_014500264.1|//PREDICTED: psbP domain-containing protein 3, chloroplastic [Vigna radiata var. radiata]
Aradu.S3QGS	657	121.64	99.63	1.04117	4.37995e-08	Up	NA	NA	NA	NA	gi|720068926|ref|XP_010277272.1|//PREDICTED: uncharacterized protein LOC104611772 [Nelumbo nucifera]
Aradu.S4UH1	733	859.03	418.62	1.79027	5.07465e-105	Up	NA	GO:0033743//peptide-methionine (R)-S-oxide reductase activity	GO:0006979//response to oxidative stress;GO:0030091//protein repair;GO:0055114//oxidation-reduction process	K07305//peptide-methionine (R)-S-oxide reductase [EC:1.8.4.12]	gi|357447579|ref|XP_003594065.1|//methionine sulfoxide reductase B 2 [Medicago truncatula]
Aradu.S4V52	995	771.96	359.78	1.85462	3.88449e-99	Up	GO:0009535//chloroplast thylakoid membrane;GO:0010287//plastoglobule;GO:0016021//integral component of membrane;GO:0009941//chloroplast envelope;GO:0009522//photosystem I	GO:0046872//metal ion binding;GO:0016168//chlorophyll binding	GO:0009765//photosynthesis, light harvesting;GO:0018298//protein-chromophore linkage	K08910//light-harvesting complex I chlorophyll a/b binding protein 4	gi|255547367|ref|XP_002514741.1|//PREDICTED: chlorophyll a-b binding protein P4, chloroplastic [Ricinus communis]
Aradu.S5MWI	1857	299.84	1087.98	-1.10618	3.23863e-39	Down	GO:0016021//integral component of membrane	GO:0020037//heme binding;GO:0005506//iron ion binding;GO:0010295//(+)-abscisic acid 8'-hydroxylase activity	GO:0010268//brassinosteroid homeostasis;GO:0016132//brassinosteroid biosynthetic process;GO:0016125//sterol metabolic process;GO:0009687//abscisic acid metabolic process;GO:0048838//release of seed from dormancy;GO:0055114//oxidation-reduction process	K11866//STAM-binding protein [EC:3.4.19.12];K09571//FK506-binding protein 4/5 [EC:5.2.1.8];K09843//(+)-abscisic acid 8'-hydroxylase [EC:1.14.13.93]	gi|1000971986|ref|XP_002516651.2|//PREDICTED: protein RKD4 [Ricinus communis];gi|976907270|gb|KVH94648.1|//cytochrome P450 [Cynara cardunculus var. scolymus]
Aradu.S5PR2	654	111.34	2.53	6.2129	1.79565e-36	Up	GO:0044424//intracellular part	NA	GO:0006259//DNA metabolic process	NA	gi|922329871|ref|XP_003629719.2|//F-box protein [Medicago truncatula]
Aradu.S5XS2	3063	780.48	526.95	1.3199	1.03211e-61	Up	NA	NA	NA	K14972//PAX-interacting protein 1;K01507//inorganic pyrophosphatase [EC:3.6.1.1];K15542//polyadenylation factor subunit 2;K12662//U4/U6 small nuclear ribonucleoprotein PRP4;K14963//COMPASS component SWD3	gi|571535860|ref|XP_006600769.1|//PREDICTED: transcriptional corepressor LEUNIG-like isoform X1 [Glycine max];gi|571535866|ref|XP_006600771.1|//PREDICTED: transcriptional corepressor LEUNIG-like isoform X3 [Glycine max];gi|734359121|gb|KHN15134.1|//Transcriptional corepressor LEUNIG [Glycine soja];gi|356513914|ref|XP_003525653.1|//PREDICTED: transcriptional corepressor LEUNIG-like isoform X2 [Gly…
Aradu.S6ATU	789	49.02	13.01	2.66696	2.54693e-11	Up	NA	NA	NA	K11592//endoribonuclease Dicer [EC:3.1.26.-];K10532//heparan-alpha-glucosaminide N-acetyltransferase [EC:2.3.1.78]	gi|950971504|ref|XP_014500330.1|//PREDICTED: protein FAM179B isoform X1 [Vigna radiata var. radiata]
Aradu.S6Z23	1710	664.07	434.3	1.36585	1.67057e-55	Up	NA	NA	NA	K11323//histone arginine demethylase JMJD6 [EC:1.14.11.-];K20285//Rab9 effector protein with kelch motifs;K12872//pre-mRNA-splicing factor RBM22/SLT11	gi|502133608|ref|XP_004501827.1|//PREDICTED: LOW QUALITY PROTEIN: kelch domain-containing protein 4 [Cicer arietinum];gi|734402159|gb|KHN31924.1|//Kelch domain-containing protein 4 [Glycine soja];gi|571451280|ref|XP_006578686.1|//PREDICTED: kelch domain-containing protein 4-like isoform X1 [Glycine max]
Aradu.S7CZ4	2532	343.71	70.15	3.04588	4.14477e-79	Up	GO:0009505//plant-type cell wall;GO:0016021//integral component of membrane;GO:0005578//proteinaceous extracellular matrix	GO:0046556//alpha-L-arabinofuranosidase activity;GO:0009044//xylan 1,4-beta-xylosidase activity	GO:0045493//xylan catabolic process;GO:0031222//arabinan catabolic process	K15920//beta-D-xylosidase 4 [EC:3.2.1.37]	gi|922370097|ref|XP_013457212.1|//beta-xylosidase/alpha-L-arabinofuranosidase-like protein [Medicago truncatula]
Aradu.S8680	1099	33.98	145.26	-1.34267	1.77169e-08	Down	GO:0009507//chloroplast	GO:0008878//glucose-1-phosphate adenylyltransferase activity;GO:0005524//ATP binding	GO:0019252//starch biosynthetic process;GO:0005978//glycogen biosynthetic process	K00975//glucose-1-phosphate adenylyltransferase [EC:2.7.7.27]	gi|359807441|ref|NP_001241391.1|//uncharacterized protein LOC100810451 [Glycine max];gi|947102560|gb|KRH51052.1|//hypothetical protein GLYMA_07G258500 [Glycine max]
Aradu.S8IGJ	1373	7	174	-3.88238	6.34256e-30	Down	NA	NA	NA	NA	gi|502116836|ref|XP_004495610.1|//PREDICTED: uncharacterized protein LOC101496090 [Cicer arietinum]
Aradu.S8XWY	1527	3980.26	2072.05	1.69501	0	Up	GO:0016020//membrane;GO:0045298//tubulin complex;GO:0005874//microtubule;GO:0005794//Golgi apparatus	GO:0005515//protein binding;GO:0005525//GTP binding;GO:0005200//structural constituent of cytoskeleton;GO:0003924//GTPase activity	GO:0009651//response to salt stress;GO:0007017//microtubule-based process	K07375//tubulin beta	gi|567858482|ref|XP_006421924.1|//hypothetical protein CICLE_v10004755mg [Citrus clementina]
Aradu.S9CWT	2289	469.69	330.19	1.26162	2.43017e-35	Up	NA	NA	NA	K09285//AP2-like factor, ANT lineage	gi|571455005|ref|XP_006579963.1|//PREDICTED: AP2-like ethylene-responsive transcription factor ANT isoform X5 [Glycine max];gi|593785517|ref|XP_007155799.1|//hypothetical protein PHAVU_003G232600g [Phaseolus vulgaris]
Aradu.S9P8W	471	31	7	2.90005	2.49519e-08	Up	GO:0016020//membrane	NA	NA	K07213//copper chaperone;K10752//histone-binding protein RBBP4	gi|357483859|ref|XP_003612216.1|//heavy metal transport/detoxification superfamily protein [Medicago truncatula]
Aradu.SB5CI	597	189.28	89.88	1.82766	4.52224e-25	Up	NA	GO:0005509//calcium ion binding	NA	K13448//calcium-binding protein CML	gi|950973438|ref|XP_014500722.1|//PREDICTED: probable calcium-binding protein CML41 [Vigna radiata var. radiata]
Aradu.SC6RY	1174	1410.54	1152.76	1.04436	1.98053e-76	Up	NA	GO:0005488//binding	NA	K19027//zinc finger FYVE domain-containing protein 26;K17895//GATA-binding protein 3	gi|593266932|ref|XP_007135644.1|//hypothetical protein PHAVU_010G146300g [Phaseolus vulgaris]
Aradu.SDS8E	1162	301.38	152.37	1.73721	2.06778e-36	Up	GO:0005634//nucleus;GO:0005737//cytoplasm	GO:0043424//protein histidine kinase binding;GO:0009927//histidine phosphotransfer kinase activity	GO:0010089//xylem development;GO:0016310//phosphorylation;GO:0009736//cytokinin-activated signaling pathway;GO:0000160//phosphorelay signal transduction system	K14490//histidine-containing phosphotransfer peotein	gi|593267158|ref|XP_007135757.1|//hypothetical protein PHAVU_010G156100g [Phaseolus vulgaris]
Aradu.SG4XX	563	1639.23	997.77	1.46945	3.17858e-150	Up	NA	NA	NA	K04733//interleukin-1 receptor-associated kinase 4 [EC:2.7.11.1]	gi|659112156|ref|XP_008456091.1|//PREDICTED: basic blue protein-like [Cucumis melo];gi|595792743|ref|XP_007200120.1|//hypothetical protein PRUPE_ppa018507mg [Prunus persica]
Aradu.SGR1V	1405	397.17	308.15	1.11933	3.26968e-25	Up	GO:0010287//plastoglobule;GO:0009535//chloroplast thylakoid membrane;GO:0016021//integral component of membrane;GO:0009941//chloroplast envelope;GO:0009522//photosystem I	GO:0031409//pigment binding;GO:0046872//metal ion binding;GO:0016168//chlorophyll binding	GO:0009768//photosynthesis, light harvesting in photosystem I;GO:0009416//response to light stimulus;GO:0018298//protein-chromophore linkage	K08916//light-harvesting complex II chlorophyll a/b binding protein 5	gi|955341430|ref|XP_003534048.3|//PREDICTED: chlorophyll a-b binding protein CP26, chloroplastic [Glycine max]
Aradu.SH1N1	327	3	31	-2.61603	3.26244e-05	Down	GO:0016021//integral component of membrane	NA	NA	NA	gi|734420416|gb|KHN40803.1|//hypothetical protein glysoja_015170 [Glycine soja]
Aradu.SH88G	1613	458	12	6.00745	1.36165e-145	Up	NA	GO:0030151//molybdenum ion binding;GO:0008482//sulfite oxidase activity	GO:0042128//nitrate assimilation;GO:0055114//oxidation-reduction process;GO:0044710//single-organism metabolic process	K00387//sulfite oxidase [EC:1.8.3.1]	gi|950934495|ref|XP_014514586.1|//PREDICTED: sulfite oxidase [Vigna radiata var. radiata]
Aradu.SI3S6	547	389	215	1.60864	7.11029e-42	Up	NA	NA	NA	NA	gi|593144281|ref|XP_007131848.1|//hypothetical protein PHAVU_011G046400g [Phaseolus vulgaris]
Aradu.SI6KD	1084	95	350.99	-1.13222	3.04032e-14	Down	GO:0005634//nucleus	GO:0008270//zinc ion binding;GO:0044212//transcription regulatory region DNA binding	GO:0000724//double-strand break repair via homologous recombination;GO:0042742//defense response to bacterium	NA	gi|356517808|ref|XP_003527578.1|//PREDICTED: zinc finger SWIM domain-containing protein 7-like isoform X4 [Glycine max];gi|502127450|ref|XP_004499716.1|//PREDICTED: zinc finger SWIM domain-containing protein 7-like [Cicer arietinum]
Aradu.SIK94	693	498.69	2385.67	-1.50497	1.49786e-134	Down	NA	NA	NA	NA	gi|356572769|ref|XP_003554538.1|//PREDICTED: uncharacterized protein LOC100806287 [Glycine max]
Aradu.SJ1JD	1339	1070.63	843.23	1.09767	3.403e-63	Up	NA	NA	NA	NA	NA
Aradu.SN0JN	1974	26.65	450.21	-3.32518	9.23457e-67	Down	GO:0016021//integral component of membrane;GO:0005773//vacuole	GO:0015140//malate transmembrane transporter activity;GO:0005215//transporter activity	GO:0071423//malate transmembrane transport;GO:0098656//anion transmembrane transport;GO:0006814//sodium ion transport	K14445//solute carrier family 13 (sodium-dependent dicarboxylate transporter), member 2/3/5	gi|593694260|ref|XP_007147651.1|//hypothetical protein PHAVU_006G142700g [Phaseolus vulgaris];gi|357480493|ref|XP_003610532.1|//tonoplast dicarboxylate transporter-like protein [Medicago truncatula]
Aradu.SNG7P	447	23.99	9.93	2.02577	4.53637e-05	Up	GO:0005618//cell wall;GO:0005773//vacuole	GO:0030246//carbohydrate binding;GO:0004565//beta-galactosidase activity	GO:0005975//carbohydrate metabolic process	K12309//beta-galactosidase [EC:3.2.1.23]	gi|965664225|dbj|BAT79934.1|//hypothetical protein VIGAN_02287700 [Vigna angularis var. angularis];gi|357450109|ref|XP_003595331.1|//beta-galactosidase-like protein [Medicago truncatula]
Aradu.SQ9YX	454	219	109	1.75981	2.28064e-27	Up	GO:0016021//integral component of membrane;GO:0022625//cytosolic large ribosomal subunit;GO:0030687//preribosome, large subunit precursor	GO:0003735//structural constituent of ribosome;GO:0070180//large ribosomal subunit rRNA binding	GO:0002181//cytoplasmic translation;GO:0006414//translational elongation	K02943//large subunit ribosomal protein LP2	gi|567875341|ref|XP_006430260.1|//hypothetical protein CICLE_v10013051mg [Citrus clementina]
Aradu.ST5ZJ	1583	256	1167.47	-1.43596	2.98893e-62	Down	GO:0005886//plasma membrane	GO:0022857//transmembrane transporter activity	GO:0006810//transport	K07874//Ras-related protein Rab-1A;K00801//farnesyl-diphosphate farnesyltransferase [EC:2.5.1.21]	gi|571471975|ref|XP_006585457.1|//PREDICTED: WAT1-related protein At1g68170-like isoform X1 [Glycine max]
Aradu.SV3M6	1159	71.53	330.74	-1.45587	3.54221e-19	Down	NA	NA	NA	K07466//replication factor A1	gi|357511469|ref|XP_003626023.1|//replication factor-A carboxy-terminal domain protein [Medicago truncatula]
Aradu.SV4JZ	1325	39.65	286.52	-2.10004	6.46325e-27	Down	NA	GO:0003677//DNA binding;GO:0005524//ATP binding	NA	K19562//bifunctional dethiobiotin synthetase / adenosylmethionine---8-amino-7-oxononanoate aminotransferase [EC:6.3.3.3 2.6.1.62];K11665//DNA helicase INO80 [EC:3.6.4.12]	gi|920700521|gb|KOM43746.1|//hypothetical protein LR48_Vigan05g135100 [Vigna angularis];gi|965670612|dbj|BAT85219.1|//hypothetical protein VIGAN_04274100 [Vigna angularis var. angularis];gi|922393507|ref|XP_013465161.1|//methyltransferase 21D-like protein [Medicago truncatula]
Aradu.SW45G	3605	435.45	1909.75	-1.3796	5.44434e-95	Down	GO:0016021//integral component of membrane	NA	GO:0055085//transmembrane transport	K14794//ribosomal RNA-processing protein 12;K17892//ferredoxin-thioredoxin reductase catalytic chain [EC:1.8.7.2]	gi|356519027|ref|XP_003528176.1|//PREDICTED: protein NUCLEAR FUSION DEFECTIVE 4-like [Glycine max]
Aradu.SW5JR	1864	229.51	47.4	3.0288	4.42004e-53	Up	NA	GO:0008810//cellulase activity	GO:0030245//cellulose catabolic process	K01179//endoglucanase [EC:3.2.1.4]	gi|502117774|ref|XP_004495939.1|//PREDICTED: endoglucanase 17 [Cicer arietinum];gi|356536709|ref|XP_003536878.1|//PREDICTED: endoglucanase 17-like [Glycine max]
Aradu.SW7ZD	1320	2106.81	1684.68	1.07579	6.21617e-119	Up	NA	NA	NA	K06911//uncharacterized protein	gi|734426741|gb|KHN43861.1|//Pirin-like protein [Glycine soja]
Aradu.SYU88	1720	303	79	2.6926	5.95619e-62	Up	GO:0030117//membrane coat	GO:0003899//DNA-directed 5'-3' RNA polymerase activity;GO:0005198//structural molecule activity;GO:0051536//iron-sulfur cluster binding	GO:0006886//intracellular protein transport;GO:0048193//Golgi vesicle transport;GO:0006260//DNA replication;GO:0016192//vesicle-mediated transport	K17302//coatomer subunit beta';K02685//DNA primase large subunit [EC:2.7.7.-]	gi|470121788|ref|XP_004296940.1|//PREDICTED: probable DNA primase large subunit [Fragaria vesca subsp. vesca];gi|734350429|gb|KHN12376.1|//Putative DNA primase large subunit [Glycine soja];gi|728819678|gb|KHG03311.1|//hypothetical protein F383_26494 [Gossypium arboreum];gi|920680473|gb|KOM27338.1|//hypothetical protein LR48_Vigan406s014800 [Vigna angularis]
Aradu.SZ6Y0	1146	1276.33	573.74	1.90674	4.64976e-169	Up	NA	GO:0016787//hydrolase activity	NA	K01061//carboxymethylenebutenolidase [EC:3.1.1.45]	gi|734415147|gb|KHN37559.1|//Endo-1,3(4)-beta-D-glucanase [Glycine soja]
Aradu.T00FF	2155	476.68	383.75	1.06606	8.91951e-28	Up	GO:0016020//membrane;GO:0009505//plant-type cell wall;GO:0009506//plasmodesma	GO:0016722//oxidoreductase activity, oxidizing metal ions;GO:0005507//copper ion binding;GO:0008447//L-ascorbate oxidase activity	GO:0055114//oxidation-reduction process	K19791//iron transport multicopper oxidase	gi|743907069|ref|XP_011046956.1|//PREDICTED: L-ascorbate oxidase homolog [Populus euphratica];gi|593781847|ref|XP_007153964.1|//hypothetical protein PHAVU_003G080100g [Phaseolus vulgaris]
Aradu.T0MLJ	1187	94.63	848.98	-2.41215	2.45656e-90	Down	NA	NA	NA	K03283//heat shock 70kDa protein 1/8;K16219//protein N-terminal methyltransferase [EC:2.1.1.244];K20393//PRA1 family protein 3	gi|356523382|ref|XP_003530319.1|//PREDICTED: uncharacterized protein LOC100815805 [Glycine max]
Aradu.T0NPE	1722	308.71	1551.98	-1.57658	3.5593e-94	Down	NA	NA	NA	K14007//protein transport protein SEC24;K01301//N-acetylated-alpha-linked acidic dipeptidase [EC:3.4.17.21];K14299//nucleoporin SEH1;K05658//ATP-binding cassette, subfamily B (MDR/TAP), member 1 [EC:3.6.3.44];K20182//vacuolar protein sorting-associated protein 33;K00026//malate dehydrogenase [EC:1.1.1.37]	gi|502130405|ref|XP_004500639.1|//PREDICTED: protein EXORDIUM-like [Cicer arietinum];gi|571504288|ref|XP_003543854.2|//PREDICTED: uncharacterized protein LOC100780312 [Glycine max]
Aradu.T0ZKV	651	146.91	31.89	2.95696	8.13381e-34	Up	NA	NA	NA	NA	gi|571474154|ref|XP_006586139.1|//PREDICTED: classical arabinogalactan protein 4-like [Glycine max]
Aradu.T18UG	318	44.51	35.03	1.09875	0.000320242	Up	NA	NA	NA	NA	NA
Aradu.T1H3M	1651	0	564	-9.38634	3.33896e-81	Down	GO:0016020//membrane;GO:0005739//mitochondrion	NA	NA	K13484//5-hydroxyisourate hydrolase / 2-oxo-4-hydroxy-4-carboxy-5-ureidoimidazoline decarboxylase [EC:3.5.2.17 4.1.1.97];K17785//mitofilin	gi|593264198|ref|XP_007134277.1|//hypothetical protein PHAVU_010G033700g [Phaseolus vulgaris];gi|955335588|ref|XP_014634433.1|//PREDICTED: MICOS complex subunit MIC60-like isoform X3 [Glycine max];gi|955335590|ref|XP_014634435.1|//PREDICTED: uncharacterized protein LOC100794530 isoform X4 [Glycine max];gi|947094657|gb|KRH43242.1|//hypothetical protein GLYMA_08G139400 [Glycine max]
Aradu.T1I30	342	6	35	-1.79111	0.000371521	Down	GO:0016021//integral component of membrane	GO:0005524//ATP binding;GO:0004672//protein kinase activity	GO:0006468//protein phosphorylation	K13420//LRR receptor-like serine/threonine-protein kinase FLS2 [EC:2.7.11.1]	gi|734390501|gb|KHN26789.1|//Leucine-rich repeat receptor-like serine/threonine-protein kinase [Glycine soja]
Aradu.T1ZRM	1586	95	348.56	-1.1222	5.58986e-14	Down	GO:0016021//integral component of membrane	NA	NA	K04733//interleukin-1 receptor-associated kinase 4 [EC:2.7.11.1];K12173//BRCA1-A complex subunit BRE	gi|955374631|ref|XP_006599330.2|//PREDICTED: thaumatin-like protein 1b [Glycine max]
Aradu.T25QT	1110	1136.11	466.17	2.03838	2.34351e-164	Up	NA	GO:0003993//acid phosphatase activity	GO:0016311//dephosphorylation	K20728//vegetative storage protein 2;K02866//large subunit ribosomal protein L10e	gi|356575237|ref|XP_003555748.1|//PREDICTED: acid phosphatase 1-like [Glycine max]
Aradu.T28MJ	1331	953.63	3367.91	-1.06715	2.01086e-111	Down	GO:0005739//mitochondrion;GO:0009507//chloroplast	GO:0005507//copper ion binding;GO:0004124//cysteine synthase activity;GO:0016740//transferase activity;GO:0030170//pyridoxal phosphate binding;GO:0050017//L-3-cyanoalanine synthase activity	GO:0019500//cyanide catabolic process;GO:0008652//cellular amino acid biosynthetic process;GO:0006535//cysteine biosynthetic process from serine;GO:0006955//immune response;GO:0080147//root hair cell development	K13034//L-3-cyanoalanine synthase/ cysteine synthase [EC:2.5.1.47 4.4.1.9]	gi|502105258|ref|XP_004492762.1|//PREDICTED: bifunctional L-3-cyanoalanine synthase/cysteine synthase 1, mitochondrial [Cicer arietinum];gi|636747235|gb|AIA22208.1|//beta-cyanoalanine synthase [Lathyrus sativus]
Aradu.T2RRK	858	117	96	1.03861	8.14091e-08	Up	NA	NA	NA	NA	NA
Aradu.T2X2K	1201	5317	3783.66	1.24404	0	Up	GO:0016021//integral component of membrane	GO:0051119//sugar transmembrane transporter activity	GO:0008643//carbohydrate transport;GO:0034219//carbohydrate transmembrane transport	K15382//solute carrier family 50 (sugar transporter)	gi|920716696|gb|KOM56784.1|//hypothetical protein LR48_Vigan10g267600 [Vigna angularis];gi|356571441|ref|XP_003553885.1|//PREDICTED: bidirectional sugar transporter SWEET5-like [Glycine max]
Aradu.T32FV	1877	329.81	1280.41	-1.20369	2.9389e-52	Down	GO:0005634//nucleus;GO:0016021//integral component of membrane;GO:0009941//chloroplast envelope;GO:0000786//nucleosome;GO:0009570//chloroplast stroma	GO:0003677//DNA binding;GO:0005524//ATP binding;GO:0004003//ATP-dependent DNA helicase activity	GO:0006344//maintenance of chromatin silencing;GO:0032197//transposition, RNA-mediated;GO:0090241//negative regulation of histone H4 acetylation;GO:0006349//regulation of gene expression by genetic imprinting;GO:0051574//positive regulation of histone H3-K9 methylation;GO:0032508//DNA duplex unwinding;GO:0006346//methylation-dependent chromatin silencing;GO:0009294//DNA mediated transformation;GO…	K17302//coatomer subunit beta';K19001//ATP-dependent DNA helicase	gi|527206164|gb|EPS71817.1|//hypothetical protein M569_02942, partial [Genlisea aurea];gi|357483387|ref|XP_003611980.1|//chromatin-remodeling complex ATPase chain, putative [Medicago truncatula];gi|15240074|ref|NP_201476.1|//ATP-dependent DNA helicase DDM1 [Arabidopsis thaliana]
Aradu.T33RR	1102	4	144.71	-4.42381	5.87078e-27	Down	GO:0031965//nuclear membrane;GO:0044424//intracellular part;GO:0005737//cytoplasm	GO:0008565//protein transporter activity;GO:0008139//nuclear localization sequence binding	GO:0006606//protein import into nucleus	K15436//transportin-3	gi|828325814|ref|XP_012573588.1|//PREDICTED: transportin-3 [Cicer arietinum];gi|920689239|gb|KOM33222.1|//hypothetical protein LR48_Vigan01g277800 [Vigna angularis];gi|947053938|gb|KRH03391.1|//hypothetical protein GLYMA_17G094800 [Glycine max]
Aradu.T3S5X	1540	757	604.25	1.07835	6.39954e-44	Up	NA	GO:0005488//binding	GO:0006366//transcription from RNA polymerase II promoter	K16189//phytochrome-interacting factor 4;K04733//interleukin-1 receptor-associated kinase 4 [EC:2.7.11.1];K11253//histone H3;K12126//phytochrome-interacting factor 3	gi|734395850|gb|KHN29208.1|//Transcription factor bHLH130 [Glycine soja]
Aradu.T3UVI	710	216	145	1.32819	1.95635e-18	Up	NA	NA	NA	NA	NA
Aradu.T3Z68	543	124.2	73.85	1.5032	2.69769e-13	Up	NA	NA	NA	NA	gi|571505964|ref|XP_006595646.1|//PREDICTED: VQ motif-containing protein 22-like [Glycine max]
Aradu.T4VTL	1882	29.95	337.05	-2.73913	3.61671e-42	Down	GO:0016020//membrane;GO:0016021//integral component of membrane	NA	NA	NA	gi|223531921|gb|EEF33735.1|//conserved hypothetical protein [Ricinus communis];gi|571481946|ref|XP_006588810.1|//PREDICTED: uncharacterized protein LOC100788770 [Glycine max]
Aradu.T554L	950	107.03	35.5	2.34533	7.05952e-20	Up	GO:0005777//peroxisome;GO:0005773//vacuole	GO:0004185//serine-type carboxypeptidase activity;GO:0016747//transferase activity, transferring acyl groups other than amino-acyl groups	GO:0051603//proteolysis involved in cellular protein catabolic process;GO:0019748//secondary metabolic process	K16296//serine carboxypeptidase-like clade I [EC:3.4.16.-]	gi|734419973|gb|KHN40479.1|//Serine carboxypeptidase-like 20 [Glycine soja]
Aradu.T5EIW	444	33.37	11	2.35425	2.23262e-07	Up	NA	GO:0005509//calcium ion binding	NA	K17338//receptor expression-enhancing protein 1/2/3/4	gi|351721377|ref|NP_001237975.1|//uncharacterized protein LOC100500687 [Glycine max]
Aradu.T6ZTX	447	43.06	2	5.18148	4.73575e-15	Up	GO:0016021//integral component of membrane	GO:0016740//transferase activity	GO:0044237//cellular metabolic process;GO:1901564//organonitrogen compound metabolic process	K03283//heat shock 70kDa protein 1/8;K01800//maleylacetoacetate isomerase [EC:5.2.1.2]	gi|194466145|gb|ACF74303.1|//glutathione S-transferase 4 [Arachis hypogaea];gi|357484413|ref|XP_003612494.1|//transmembrane protein, putative [Medicago truncatula]
Aradu.T7TUD	1412	216.51	155.87	1.2273	1.57109e-16	Up	GO:0016021//integral component of membrane	GO:0005215//transporter activity	GO:0006810//transport	K15272//solute carrier family 35 (UDP-sugar transporter), member A1/2/3	gi|356565414|ref|XP_003550935.1|//PREDICTED: probable purine permease 11 [Glycine max]
Aradu.T882N	361	199	112	1.58248	9.5237e-22	Up	NA	NA	NA	K17081//prohibitin 2	NA
Aradu.T9UJ8	1254	0	219	-8.02158	7.68204e-38	Down	GO:0005737//cytoplasm	GO:0047429//nucleoside-triphosphate diphosphatase activity;GO:0046872//metal ion binding;GO:0000166//nucleotide binding	GO:0009204//deoxyribonucleoside triphosphate catabolic process;GO:0009117//nucleotide metabolic process	K01519//inosine triphosphate pyrophosphatase [EC:3.6.1.-]	gi|568868654|ref|XP_006487596.1|//PREDICTED: inosine triphosphate pyrophosphatase [Citrus sinensis]
Aradu.TB6GC	1490	530.51	1892.2	-1.08141	1.22191e-64	Down	GO:0005634//nucleus	GO:0003677//DNA binding;GO:0003700//transcription factor activity, sequence-specific DNA binding;GO:0046983//protein dimerization activity	GO:0006355//regulation of transcription, DNA-templated	K09264//MADS-box transcription factor, plant	gi|734411675|gb|KHN36061.1|//Floral homeotic protein DEFICIENS [Glycine soja];gi|951049196|ref|XP_014519900.1|//PREDICTED: floral homeotic protein DEFICIENS-like isoform X2 [Vigna radiata var. radiata]
Aradu.TBA51	923	2542.45	11117.8	-1.37537	0	Down	NA	NA	NA	NA	gi|71040661|gb|AAZ20279.1|//lea protein 2 [Arachis hypogaea]
Aradu.TCQ2L	1684	1051.02	4510.69	-1.34835	1.02039e-214	Down	GO:0005783//endoplasmic reticulum;GO:0031090//organelle membrane;GO:0016021//integral component of membrane	GO:0020037//heme binding;GO:0016853//isomerase activity;GO:0005506//iron ion binding;GO:0033770//2-hydroxyisoflavanone synthase activity	GO:0009717//isoflavonoid biosynthetic process;GO:0055114//oxidation-reduction process	K13257//2-hydroxyisoflavanone synthase [EC:1.14.13.136];K07408//cytochrome P450 family 1 subfamily A polypeptide 1 [EC:1.14.14.1]	gi|920687607|gb|KOM31590.1|//hypothetical protein LR48_Vigan01g114500 [Vigna angularis];gi|75314070|sp|Q9SXS3.1|C93C2_GLYEC//RecName: Full=2-hydroxyisoflavanone synthase; Short=2HI synthase; AltName: Full=CYP Ge-8; AltName: Full=Cytochrome P450 93C2; AltName: Full=Isoflavonoid synthase
Aradu.TE0XJ	2479	305.95	215.08	1.26163	1.34115e-23	Up	GO:0016021//integral component of membrane	GO:0015238//drug transmembrane transporter activity;GO:0015297//antiporter activity	GO:0006855//drug transmembrane transport	K20456//oxysterol-binding protein 1	gi|356557725|ref|XP_003547162.1|//PREDICTED: protein DETOXIFICATION 42 isoform X2 [Glycine max]
Aradu.TJ4B5	1105	472.08	1769.07	-1.15268	6.30117e-67	Down	NA	NA	NA	NA	gi|593780751|ref|XP_007153416.1|//hypothetical protein PHAVU_003G033400g, partial [Phaseolus vulgaris]
Aradu.TL6UB	1716	463.28	362.87	1.10564	1.37049e-28	Up	NA	GO:0003677//DNA binding;GO:0005524//ATP binding	GO:0006260//DNA replication	K07478//putative ATPase	gi|920703151|gb|KOM46376.1|//hypothetical protein LR48_Vigan07g008000 [Vigna angularis]
Aradu.TLE1X	1963	2034	1374.01	1.31913	3.55434e-158	Up	NA	NA	NA	NA	NA
Aradu.TLG7W	1747	2358.49	8353.69	-1.07134	6.02138e-276	Down	GO:0016021//integral component of membrane;GO:0005886//plasma membrane	GO:0022857//transmembrane transporter activity	GO:0006810//transport;GO:0055085//transmembrane transport	K07874//Ras-related protein Rab-1A;K00801//farnesyl-diphosphate farnesyltransferase [EC:2.5.1.21]	gi|356528775|ref|XP_003532973.1|//PREDICTED: WAT1-related protein At1g68170-like [Glycine max];gi|764521411|ref|XP_004288673.2|//PREDICTED: uncharacterized protein LOC101300394 [Fragaria vesca subsp. vesca]
Aradu.TML8X	797	21.08	405	-3.51077	7.13058e-63	Down	NA	NA	NA	NA	NA
Aradu.TQ01E	1506	22490.3	15925.8	1.25114	0	Up	NA	NA	NA	K02883//large subunit ribosomal protein L18e;K03006//DNA-directed RNA polymerase II subunit RPB1 [EC:2.7.7.6];K14709//solute carrier family 39 (zinc transporter), member 1/2/3;K11855//ubiquitin carboxyl-terminal hydrolase 36/42 [EC:3.4.19.12]	gi|356547549|ref|XP_003542174.1|//PREDICTED: 36.4 kDa proline-rich protein-like [Glycine max];gi|951065296|ref|XP_014523711.1|//PREDICTED: 36.4 kDa proline-rich protein-like [Vigna radiata var. radiata]
Aradu.TRJ3V	1481	377.43	275.57	1.207	6.63705e-27	Up	GO:0043231//intracellular membrane-bounded organelle	GO:0080043//quercetin 3-O-glucosyltransferase activity;GO:0080044//quercetin 7-O-glucosyltransferase activity	GO:0009813//flavonoid biosynthetic process;GO:0052696//flavonoid glucuronidation	K13496//UDP-glucosyl transferase 73C [EC:2.4.1.-];K14595//abscisate beta-glucosyltransferase [EC:2.4.1.263]	gi|922369414|ref|XP_013456871.1|//flavonoid glucosyltransferase [Medicago truncatula]
Aradu.TSF3S	1659	372.98	1352.59	-1.10535	2.7078e-48	Down	NA	NA	NA	NA	gi|502164278|ref|XP_004513107.1|//PREDICTED: uncharacterized protein LOC101508941 [Cicer arietinum];gi|502169604|ref|XP_004514645.1|//PREDICTED: uncharacterized protein LOC101512620 [Cicer arietinum]
Aradu.TSM0G	581	31	108	-1.04748	4.45404e-05	Down	NA	NA	NA	NA	gi|698544568|ref|XP_009767109.1|//PREDICTED: uncharacterized protein LOC104218338 [Nicotiana sylvestris]
Aradu.TST6W	870	188.16	1	8.30902	1.48818e-52	Up	NA	NA	NA	NA	NA
Aradu.TTW29	1379	3960.95	2542.86	1.3926	0	Up	GO:0030529//intracellular ribonucleoprotein complex;GO:0019013//viral nucleocapsid	GO:0000166//nucleotide binding;GO:0003676//nucleic acid binding	NA	K11294//nucleolin	gi|356533254|ref|XP_003535181.1|//PREDICTED: 29 kDa ribonucleoprotein A, chloroplastic [Glycine max]
Aradu.TUT46	1158	51.69	186.73	-1.09979	4.66512e-08	Down	NA	GO:0016740//transferase activity	GO:0000280//nuclear division;GO:0000819//sister chromatid segregation	K11268//N-acetyltransferase [EC:2.3.1.-]	gi|502088238|ref|XP_004488777.1|//PREDICTED: protein CHROMOSOME TRANSMISSION FIDELITY 7-like [Cicer arietinum]
Aradu.TV3WI	1817	329.36	1344.47	-1.27609	6.66958e-60	Down	NA	GO:0051213//dioxygenase activity	GO:0055114//oxidation-reduction process	NA	gi|947075043|gb|KRH23883.1|//hypothetical protein GLYMA_12G008700 [Glycine max]
Aradu.TV4LZ	959	14809	11446.7	1.12475	0	Up	NA	NA	NA	K18635//protein SPIRAL1 and related proteins	gi|194466083|gb|ACF74272.1|//putative nitrilase-associated protein [Arachis hypogaea]
Aradu.TWU0S	1662	714.84	355.79	1.7598	1.24044e-85	Up	GO:0016021//integral component of membrane	GO:0046872//metal ion binding;GO:0004721//phosphoprotein phosphatase activity	GO:0006470//protein dephosphorylation	K06269//serine/threonine-protein phosphatase PP1 catalytic subunit [EC:3.1.3.16]	gi|356505811|ref|XP_003521683.1|//PREDICTED: serine/threonine-protein phosphatase PP1 [Glycine max]
Aradu.TY9MP	1590	124.83	571.03	-1.4404	2.01314e-31	Down	GO:0009505//plant-type cell wall;GO:0009506//plasmodesma;GO:0016021//integral component of membrane;GO:0046658//anchored component of plasma membrane;GO:0005773//vacuole	GO:0004553//hydrolase activity, hydrolyzing O-glycosyl compounds;GO:0030247//polysaccharide binding	GO:0005975//carbohydrate metabolic process	K19893//glucan endo-1,3-beta-glucosidase 5/6 [EC:3.2.1.39]	gi|734343159|gb|KHN10282.1|//Glucan endo-1,3-beta-glucosidase 5 [Glycine soja]
Aradu.U0ER6	1800	4838.64	3857.88	1.08	5.69361e-273	Up	NA	GO:0001047//core promoter binding	GO:0007623//circadian rhythm;GO:0009637//response to blue light;GO:0006355//regulation of transcription, DNA-templated;GO:0009911//positive regulation of flower development	K12116//flavin-binding kelch repeat F-box protein 1	gi|734377138|gb|KHN21615.1|//Adagio protein 3 [Glycine soja]
Aradu.U0LB0	1873	967.39	810.13	1.00915	4.14979e-50	Up	NA	GO:0016491//oxidoreductase activity	GO:0055114//oxidation-reduction process	K08243//Polyketide reductase;K19642//D-galacturonate reductase [EC:1.1.1.365];K00011//aldehyde reductase [EC:1.1.1.21]	gi|565488761|ref|XP_006302020.1|//hypothetical protein CARUB_v10020002mg [Capsella rubella];gi|356577291|ref|XP_003556761.1|//PREDICTED: NAD(P)H-dependent 6'-deoxychalcone synthase [Glycine max];gi|951019113|ref|XP_014512039.1|//PREDICTED: NAD(P)H-dependent 6'-deoxychalcone synthase-like [Vigna radiata var. radiata]
Aradu.U0S8R	520	73.32	447.88	-1.85763	2.92401e-35	Down	NA	GO:0043531//ADP binding;GO:0005524//ATP binding	GO:0007165//signal transduction;GO:0006952//defense response	K03283//heat shock 70kDa protein 1/8;K07466//replication factor A1;K11251//histone H2A;K08852//serine/threonine-protein kinase/endoribonuclease IRE1 [EC:2.7.11.1 3.1.26.-];K13414//mitogen-activated protein kinase kinase kinase 1 [EC:2.7.11.25]	gi|694378397|ref|XP_009365438.1|//PREDICTED: TMV resistance protein N-like [Pyrus x bretschneideri];gi|694402078|ref|XP_009376052.1|//PREDICTED: TMV resistance protein N-like [Pyrus x bretschneideri]
Aradu.U0WMD	4178	3	1159	-7.8405	9.78594e-197	Down	NA	NA	NA	K07466//replication factor A1	gi|922329981|ref|XP_003629969.2|//DUF223 domain protein [Medicago truncatula];gi|502130230|ref|XP_004500576.1|//PREDICTED: uncharacterized protein LOC101500546 [Cicer arietinum];gi|922362498|ref|XP_003605674.2|//replication factor-A carboxy-terminal domain protein [Medicago truncatula];gi|357491997|ref|XP_003616287.1|//replication factor-A carboxy-terminal domain protein [Medicago truncatula];gi|…
Aradu.U13TY	2789	233	1238.65	-1.65716	5.62237e-81	Down	NA	GO:0016740//transferase activity	GO:0016070//RNA metabolic process;GO:0032259//methylation	K14292//trimethylguanosine synthase [EC:2.1.1.-]	gi|955365157|ref|XP_014622740.1|//PREDICTED: uncharacterized protein LOC100782129 isoform X1 [Glycine max];gi|955365159|ref|XP_014622741.1|//PREDICTED: uncharacterized protein LOC100782129 isoform X2 [Glycine max]
Aradu.U1N83	1122	9	154.09	-3.3445	4.82346e-24	Down	NA	NA	GO:0006952//defense response	K03239//translation initiation factor eIF-2B subunit alpha	gi|955374583|ref|XP_003547894.3|//PREDICTED: protein LURP-one-related 11-like [Glycine max]
Aradu.U41C8	2104	0	113.93	-7.0788	5.57601e-22	Down	GO:0005794//Golgi apparatus;GO:0016021//integral component of membrane;GO:0009507//chloroplast	GO:0005247//voltage-gated chloride channel activity	GO:0006821//chloride transport;GO:1903959//regulation of anion transmembrane transport	K01870//isoleucyl-tRNA synthetase [EC:6.1.1.5];K11279//nucleosome assembly protein 1-like 1	gi|593696382|ref|XP_007148673.1|//hypothetical protein PHAVU_005G005200g [Phaseolus vulgaris];gi|357468441|ref|XP_003604505.1|//disease resistance-responsive, dirigent domain protein [Medicago truncatula]
Aradu.U481X	598	484.15	391.33	1.06028	5.97432e-28	Up	NA	GO:0016301//kinase activity;GO:0016538//cyclin-dependent protein serine/threonine kinase regulator activity	GO:0045859//regulation of protein kinase activity;GO:0051301//cell division;GO:0007049//cell cycle	K02219//cyclin-dependent kinase regulatory subunit CKS1	gi|351725771|ref|NP_001237104.1|//cyclin-dependent kinases regulatory subunit [Glycine max];gi|502145641|ref|XP_004506113.1|//PREDICTED: cyclin-dependent kinases regulatory subunit 1 [Cicer arietinum]
Aradu.U4DGM	1975	338.97	185.96	1.61937	4.88321e-37	Up	GO:0016021//integral component of membrane	NA	NA	K11593//eukaryotic translation initiation factor 2C	gi|965613919|dbj|BAT99551.1|//hypothetical protein VIGAN_10100300 [Vigna angularis var. angularis]
Aradu.U4WAJ	2001	290.36	152.38	1.68338	1.09457e-33	Up	GO:0046658//anchored component of plasma membrane	GO:0042973//glucan endo-1,3-beta-D-glucosidase activity;GO:0030247//polysaccharide binding	GO:0005975//carbohydrate metabolic process	K19891//glucan endo-1,3-beta-glucosidase 1/2/3 [EC:3.2.1.39]	gi|802604851|ref|XP_012073613.1|//PREDICTED: glucan endo-1,3-beta-glucosidase 12 [Jatropha curcas]
Aradu.U51AH	1572	1491.68	561.37	2.16312	3.9164e-232	Up	NA	GO:0004170//dUTP diphosphatase activity	GO:0046080//dUTP metabolic process	K01520//dUTP pyrophosphatase [EC:3.6.1.23]	gi|593499575|ref|XP_007141989.1|//hypothetical protein PHAVU_008G243100g [Phaseolus vulgaris]
Aradu.U526H	2340	160.48	73.32	1.88332	2.4835e-22	Up	GO:0005634//nucleus	GO:0005524//ATP binding;GO:0004672//protein kinase activity	GO:0006468//protein phosphorylation	K14500//BR-signaling kinase [EC:2.7.11.1];K11446//histone demethylase JARID1 [EC:1.14.11.-]	gi|734436410|gb|KHN48114.1|//Putative lysine-specific demethylase JMJ14 [Glycine soja];gi|502157222|ref|XP_004510799.1|//PREDICTED: probable serine/threonine-protein kinase At5g41260 [Cicer arietinum]
Aradu.U6ZP1	1151	71	362	-1.59689	1.25918e-23	Down	GO:0016021//integral component of membrane	GO:0004970//ionotropic glutamate receptor activity	GO:0035235//ionotropic glutamate receptor signaling pathway;GO:0006811//ion transport	K05387//glutamate receptor, ionotropic, plant	gi|955358879|ref|XP_014621282.1|//PREDICTED: glutamate receptor 2.7-like isoform X2 [Glycine max];gi|734337535|gb|KHN08472.1|//Glutamate receptor 2.7 [Glycine soja]
Aradu.U7WPY	2319	325.63	270.59	1.02033	2.89281e-18	Up	GO:0016020//membrane	GO:0004674//protein serine/threonine kinase activity;GO:0005524//ATP binding;GO:0000166//nucleotide binding	GO:0000165//MAPK cascade;GO:0006468//protein phosphorylation	K08857//NIMA (never in mitosis gene a)-related kinase 1/4/5 [EC:2.7.11.1]	gi|356536779|ref|XP_003536912.1|//PREDICTED: serine/threonine-protein kinase Nek2-like [Glycine max]
Aradu.U8C21	1445	324.75	273.66	1.00015	1.1016e-17	Up	NA	NA	NA	K08332	gi|356564127|ref|XP_003550308.1|//PREDICTED: U-box domain-containing protein 4 [Glycine max]
Aradu.U9DZ8	2406	1689.92	5850.23	-1.03833	4.39008e-184	Down	GO:0009507//chloroplast	GO:0003824//catalytic activity	NA	K00943//dTMP kinase [EC:2.7.4.9]	gi|115432144|gb|ABI97349.1|//cold-induced thioredoxin domain-containing protein [Ammopiptanthus mongolicus]
Aradu.UA0RZ	3411	447.19	185.69	2.0212	6.15774e-65	Up	NA	NA	NA	K03013//DNA-directed RNA polymerases I, II, and III subunit RPABC1;K20777//exonuclease 3'-5' domain-containing protein 2 [EC:3.1.11.1];K17913//carlactone synthase / all-trans-10'-apo-beta-carotenal 13,14-cleaving dioxygenase [EC:1.13.11.69 1.13.11.70];K03501//16S rRNA (guanine527-N7)-methyltransferase [EC:2.1.1.170];K11593//eukaryotic translation initiation factor 2C	gi|590720075|ref|XP_007051231.1|//Uncharacterized protein TCM_004901 [Theobroma cacao];gi|698438661|ref|XP_009757288.1|//PREDICTED: uncharacterized protein LOC104210165 [Nicotiana sylvestris]
Aradu.UAV1Q	1719	14.39	681.11	-4.81154	6.09741e-125	Down	GO:0016021//integral component of membrane;GO:0000139//Golgi membrane	GO:0008378//galactosyltransferase activity	GO:0006486//protein glycosylation	K20855//beta-1,3-galactosyltransferase 1/2/3/4/5/7/8 [EC:2.4.1.-]	gi|947077944|gb|KRH26784.1|//hypothetical protein GLYMA_12G193600 [Glycine max];gi|955355165|ref|XP_014620511.1|//PREDICTED: probable beta-1,3-galactosyltransferase 2 isoform X1 [Glycine max];gi|955355168|ref|XP_014620512.1|//PREDICTED: probable beta-1,3-galactosyltransferase 2 isoform X3 [Glycine max]
Aradu.UB39J	2795	346.32	258.7	1.17403	7.91484e-24	Up	GO:0009941//chloroplast envelope;GO:0009534//chloroplast thylakoid	GO:0016630//protochlorophyllide reductase activity	GO:0055114//oxidation-reduction process;GO:0015979//photosynthesis;GO:0015995//chlorophyll biosynthetic process	K00218//protochlorophyllide reductase [EC:1.3.1.33]	gi|593698264|ref|XP_007149605.1|//hypothetical protein PHAVU_005G083700g [Phaseolus vulgaris]
Aradu.UF1FY	2658	1045.81	765.91	1.20258	3.08969e-71	Up	GO:0016020//membrane;GO:0016021//integral component of membrane	GO:0046872//metal ion binding;GO:0008131//primary amine oxidase activity;GO:0005507//copper ion binding;GO:0048038//quinone binding;GO:0016491//oxidoreductase activity	GO:0008152//metabolic process;GO:0009308//amine metabolic process;GO:0055114//oxidation-reduction process	K00276//primary-amine oxidase [EC:1.4.3.21]	gi|357462275|ref|XP_003601419.1|//copper amine oxidase, enzyme domain protein [Medicago truncatula]
Aradu.UID4B	1653	550	402	1.20544	2.24736e-38	Up	GO:0005634//nucleus;GO:0005737//cytoplasm	NA	NA	K00276//primary-amine oxidase [EC:1.4.3.21]	gi|356538287|ref|XP_003537635.1|//PREDICTED: uncharacterized protein LOC100801498 [Glycine max]
Aradu.UJ6Z9	1054	4352	20277.8	-1.46694	0	Down	NA	GO:0008106//alcohol dehydrogenase (NADP+) activity	GO:0055114//oxidation-reduction process	K00011//aldehyde reductase [EC:1.1.1.21]	gi|356566736|ref|XP_003551585.1|//PREDICTED: aldose reductase-like [Glycine max]
Aradu.UK1FU	1965	176.22	20.29	3.87174	7.88954e-50	Up	NA	NA	NA	K09273//upstream-binding transcription factor	gi|356513291|ref|XP_003525347.1|//PREDICTED: high mobility group B protein 6 [Glycine max]
Aradu.UK4HJ	719	164	76	1.86283	1.78608e-22	Up	NA	NA	NA	NA	NA
Aradu.UM03P	1254	216.25	28	3.70241	5.44207e-59	Up	GO:0016021//integral component of membrane	GO:0016491//oxidoreductase activity	GO:0055114//oxidation-reduction process	K10251//17beta-estradiol 17-dehydrogenase / very-long-chain 3-oxoacyl-CoA reductase [EC:1.1.1.62 1.1.1.330]	gi|734383767|gb|KHN24111.1|//Inactive hydroxysteroid dehydrogenase-like protein 1 [Glycine soja]
Aradu.UR751	2090	405	1758	-1.36473	3.70376e-86	Down	GO:0016021//integral component of membrane;GO:0005886//plasma membrane	GO:0004674//protein serine/threonine kinase activity;GO:0005524//ATP binding	GO:0006468//protein phosphorylation	K04733//interleukin-1 receptor-associated kinase 4 [EC:2.7.11.1]	gi|593783255|ref|XP_007154668.1|//hypothetical protein PHAVU_003G137700g [Phaseolus vulgaris];gi|947053274|gb|KRH02727.1|//hypothetical protein GLYMA_17G055900 [Glycine max];gi|922364144|ref|XP_003610010.2|//receptor-like kinase [Medicago truncatula]
Aradu.US8PA	576	1580	550	2.27563	1.53492e-261	Up	NA	NA	NA	NA	gi|593261720|ref|XP_007133039.1|//hypothetical protein PHAVU_011G146200g [Phaseolus vulgaris]
Aradu.US93A	840	57.62	634.46	-2.70768	5.07448e-77	Down	NA	NA	NA	K03946//NADH dehydrogenase (ubiquinone) 1 alpha subcomplex subunit 2	gi|734370579|gb|KHN19337.1|//NADH dehydrogenase [ubiquinone] 1 alpha subcomplex subunit 2 [Glycine soja]
Aradu.USQ9X	402	114.26	88	1.12995	1.49515e-08	Up	NA	NA	NA	NA	gi|734414427|gb|KHN37258.1|//Putative lipid-transfer protein DIR1 [Glycine soja]
Aradu.UU2H2	597	65.92	43.36	1.35756	5.76868e-07	Up	NA	GO:0004672//protein kinase activity	GO:0016310//phosphorylation;GO:0050896//response to stimulus	K04733//interleukin-1 receptor-associated kinase 4 [EC:2.7.11.1];K20718//LRR receptor-like serine/threonine-protein kinase ERECTA [EC:2.7.11.1];K10144//RING finger and CHY zinc finger domain-containing protein 1 [EC:2.3.2.27];K13420//LRR receptor-like serine/threonine-protein kinase FLS2 [EC:2.7.11.1]	gi|743891629|ref|XP_011039407.1|//PREDICTED: probable LRR receptor-like serine/threonine-protein kinase At5g45780 isoform X2 [Populus euphratica];gi|147828640|emb|CAN77573.1|//hypothetical protein VITISV_010410 [Vitis vinifera]
Aradu.UVK8T	1552	1206.2	4228.43	-1.05645	3.01162e-137	Down	GO:0005634//nucleus;GO:0005737//cytoplasm	GO:0000994//RNA polymerase III core binding	GO:0016480//negative regulation of transcription from RNA polymerase III promoter;GO:0070217//transcription factor TFIIIB complex assembly	K07953//GTP-binding protein SAR1 [EC:3.6.5.-]	gi|593628574|ref|XP_007143007.1|//hypothetical protein PHAVU_007G035700g [Phaseolus vulgaris]
Aradu.UX4KT	3188	1857.74	1001.11	1.64515	2.66735e-200	Up	GO:0044464//cell part;GO:0016021//integral component of membrane;GO:0005886//plasma membrane	GO:0005199//structural constituent of cell wall;GO:0005524//ATP binding;GO:0004674//protein serine/threonine kinase activity	GO:0000165//MAPK cascade;GO:0006468//protein phosphorylation	K04733//interleukin-1 receptor-associated kinase 4 [EC:2.7.11.1]	gi|593331824|ref|XP_007139338.1|//hypothetical protein PHAVU_008G021000g [Phaseolus vulgaris];gi|734354922|gb|KHN13807.1|//Proline-rich receptor-like protein kinase PERK9 [Glycine soja]
Aradu.UX62G	1288	1611.88	1356.98	1.00155	2.0239e-81	Up	GO:0005737//cytoplasm	GO:0046914//transition metal ion binding	GO:0030001//metal ion transport;GO:0046916//cellular transition metal ion homeostasis	K17046//protein DEK;K07213//copper chaperone	gi|571532034|ref|XP_006600157.1|//PREDICTED: uncharacterized protein LOC100527827 isoform X1 [Glycine max];gi|922388859|ref|XP_013462942.1|//heavy metal transport/detoxification superfamily protein [Medicago truncatula]
Aradu.UX9CD	1482	11.43	274.1	-3.8306	8.55251e-46	Down	GO:0016021//integral component of membrane	GO:0000166//nucleotide binding;GO:0003676//nucleic acid binding;GO:0005215//transporter activity	GO:0055085//transmembrane transport	NA	gi|571483896|ref|XP_003535506.2|//PREDICTED: hippocampus abundant transcript-like protein 1 isoform X1 [Glycine max];gi|357442989|ref|XP_003591772.1|//hippocampus abundant transcript-like protein [Medicago truncatula]
Aradu.UXN6T	1172	6695.29	4971.07	1.1828	0	Up	GO:0005634//nucleus	GO:0003677//DNA binding	GO:0006355//regulation of transcription, DNA-templated	K12581//CCR4-NOT transcription complex subunit 7/8;K03094//S-phase kinase-associated protein 1;K13126//polyadenylate-binding protein;K05941//glutathione gamma-glutamylcysteinyltransferase [EC:2.3.2.15];K01054//acylglycerol lipase [EC:3.1.1.23]	gi|356508929|ref|XP_003523205.1|//PREDICTED: NAC domain-containing protein 2 [Glycine max]
Aradu.UZ501	2355	253.82	83.11	2.36392	2.84428e-45	Up	NA	NA	NA	K17609//nucleoredoxin [EC:1.8.1.8]	gi|947042597|gb|KRG92321.1|//hypothetical protein GLYMA_20G204500 [Glycine max]
Aradu.V05DH	3750	934.33	641.54	1.2956	1.61013e-71	Up	GO:0016021//integral component of membrane	GO:0004674//protein serine/threonine kinase activity;GO:0005524//ATP binding;GO:0016491//oxidoreductase activity	GO:0006468//protein phosphorylation	K00924;K17422//large subunit ribosomal protein L41	gi|951070208|ref|XP_014490612.1|//PREDICTED: probable LRR receptor-like serine/threonine-protein kinase At4g26540 [Vigna radiata var. radiata]
Aradu.V0CGL	1585	811.27	538.77	1.34372	7.98604e-66	Up	GO:0005576//extracellular region	GO:0008061//chitin binding;GO:0004568//chitinase activity	GO:0006032//chitin catabolic process	K01183//chitinase [EC:3.2.1.14]	gi|502131776|ref|XP_004501097.1|//PREDICTED: acidic mammalian chitinase-like [Cicer arietinum]
Aradu.V0DHY	527	47	25	1.66394	9.04443e-07	Up	NA	NA	NA	NA	NA
Aradu.V0PXB	1308	144.86	843.14	-1.78791	1.04385e-61	Down	GO:0030117//membrane coat;GO:0016021//integral component of membrane	GO:0008908//isochorismatase activity	GO:0048193//Golgi vesicle transport;GO:0046907//intracellular transport;GO:0008152//metabolic process	K10750//chromatin assembly factor 1 subunit A;K17302//coatomer subunit beta'	gi|593700467|ref|XP_007150672.1|//hypothetical protein PHAVU_005G172000g [Phaseolus vulgaris];gi|255070035|ref|XP_002507099.1|//predicted protein [Micromonas sp. RCC299];gi|947098766|gb|KRH47258.1|//hypothetical protein GLYMA_07G018600 [Glycine max]
Aradu.V17TH	943	1056.33	862.09	1.04636	8.14694e-58	Up	GO:0016020//membrane	GO:0016853//isomerase activity	GO:0009987//cellular process	K20782//hydroxyproline O-arabinosyltransferase [EC:2.4.2.58];K05864//peptidyl-prolyl isomerase D [EC:5.2.1.8];K10848//DNA excision repair protein ERCC-4 [EC:3.1.-.-]	gi|734408782|gb|KHN34889.1|//hypothetical protein glysoja_004655 [Glycine soja]
[truncated: 2,023 more rows]
