# Supplementary material for: Gene expression and DNA methylation altering lead to the high oil content in wild allotetraploid peanut (A. monticola)
Source: Research Square preprint supplement (doi:10.21203/rs.3.rs-1222296/v1), 2022-01-07
Supplement: Supplementary file 2 [file dc39e557176d4f5424563534.xlsx]

## Sheet: Table S8
Table S8. The number of DMRs in CG, CHG, and CHH contexts
	CG-DMR	CHG-DMR	CHH-DMR
S245 vs SZ16	135334	157021	2058426
B245 vs BZ16	148142	213844	1943292
